# Supplementary material for: YAP and TAZ regulate adherens junction dynamics and endothelial cell distribution during vascular development
Source: eLife. 2018 Feb 5;7:e31037. doi: 10.7554/eLife.31037 (PMC5814147; doi:10.7554/eLife.31037)
Supplement: Figure 2—source data 1. — Each value corresponds to the average of several measurements for one animal (see Material and methods for details). [file elife-31037-fig2-data1.xlsx]

## Sheet: Figure 2G
Figure 2G - Radial expansion analysis
	Radial expansion in um								% of littermate control
	Yap Control	Yap KO	Taz Control	Taz KO	Y/T Control	Y/T KO			Yap Control	Yap KO	Taz Control	Taz KO	Y/T Control	Y/T KO
	1540.49	1471.05	1526.12	1573.46	1770.38	1006.21			96.3307	91.9887	97.0566	100.067	116.094	65.9834
	1691.31	1518.83	1570.33	1490.66	1232.05	1465.38			105.762	94.9763	99.8682	94.8013	80.7931	96.0933
	1685.41	1450.4	1563.17	1581.21	1374.87	1393.54			105.393	90.6974	99.4125	100.56	90.1586	91.3826
	1737.68	1584.69	1477.54	1496.73	1486.17	1244.25			108.661	99.095	93.9671	95.187	97.4569	81.593
	1439.27	1419.59	1650.49	1384.37	1458.09	851.252			90.0013	88.771	104.966	88.0413	95.6156	55.8216
	1479.04	1376.95	1555.67	1652.57	1600.06	1399.28			92.4883	86.1042	98.9356	105.098	104.926	91.7593
	1452.8	1447.95	1551.65	1613.98	1618.65	1099.11			90.8475	90.544	98.6799	102.644	106.144	72.0749
	1675.94	1398.6	1672.34	1527.04	1669.13	1177.18			104.801	87.4583	106.356	97.1148	109.454	77.1944
	1516.92	1445.59	1606.44	1371.09	1600.23				94.8571	90.3963	102.165	87.1969	104.937
	1701.92	1653.82	1555.39		1469.26				106.425	103.417	98.9178		96.348
	1670.04		1567.31		1495.56				104.432		99.6759		98.0725
n animals	11	10	11	9	11	8		Mean	100	92.3449	100	96.7457	100	78.9878
								STD	7.08074	5.38072	3.4542	6.15864	9.71235	14.0047
								Decrease		7.65512		3.25435		21.0122
Average of control	1599.16		1572.41		1524.95			t-test	p=0.0123		p=0.1525		p=0.0012

## Sheet: Figure 2H
Figure 2H - Vessel density analysis
	Ib4 area/ Field of view area (%)								% of littermate control
	Yap Control	Yap KO	Taz Control	Taz KO	Y/T Control	Y/T KO			Yap Control	Yap KO	Taz Control	Taz KO	Y/T Control	Y/T KO
	30.433	29.649	32.6594	26.987	30.1379	23.4266			100.881	87.1023	97.5113	80.575	84.6225	65.7782
	32.456	29.534	33.4887	31.9914	33.9852	23.2			97.7643	85.927	99.9873	95.5167	95.4251	65.1419
	31.816	30.094	35.0509	31.837	32.624	26.181			98.5347	85.1901	104.652	95.056	91.6031	73.5122
	30.98	27.3876	31.894	33.5042	33.9109	27.266			96.7876	91.721	95.2261	100.033	95.2166	76.5586
	32.417	27.0181	31.5563	31.3393	37.3382	29.232			103.221	94.2942	94.2178	93.5697	104.84	82.079
	31.7202	26.7864	33.6333	32.7948	37.8857	27.7073			101.186	93.9285	100.419	97.9156	106.377	77.7976
	30.7401	28.8399	34.5519	30.9805	36.5437	29.3545			98.5272	95.7095	103.162	92.4987	102.609	82.423
	30.9823		35.109	31.0317	39.6316	24.0643			103.097		104.825	92.6513	111.279	67.5687
					39.781								111.699
					34.307								96.3286
n animals	8	7	8	8	10	8		Mean	100	90.5532	100	93.4771	100	73.8574
								STD	2.44333	4.38581	4.0972	5.82421	8.81445	7.01718
								Decrease		9.44679		6.52293		26.1426
Average of control	31.4431		33.4929		35.6145			t-test	p=0.0002		p=0.0214		p<0.0001

## Sheet: Figure 2 I
Figure 2I - Branching frequency analysis
	# of branching points per field of view (200x200um)								% of littermate control
	Yap Control	Yap KO	Taz Control	Taz KO	Y/T WT	Y/T KO			Yap Control	Yap KO	Taz Control	Taz KO	Y/T WT	Y/T KO
	43.6	33	50.6	49	49.2	24.2			96.6741	73.1707	99.541	96.3934	105.429	51.8571
	42.4	28.4	56.6	51.6	44	21.2			94.0133	62.9712	111.344	101.508	94.2857	45.4286
	47.4	26.6	63.6	57	51.2	16.6			105.1	58.98	125.115	112.131	109.714	35.5714
	47.2	35.4	44.8	47.6	51.2	30.8			104.656	78.4922	88.1311	93.6393	109.714	66
	41.8	51.4	44.8	49.8	42.6	12			92.6829	113.969	88.1311	97.9672	91.2857	25.7143
	48.2	43.4	44.6	38.2	41.8				106.874	96.2306	87.7377	75.1475	89.5714
		47								104.213
n animals	6	7	6	6	6	5		Mean	100	84.0038	100	96.1311	100	44.9143
								STD	6.25104	21.1033	15.4386	12.1233	9.33328	15.403
								Decrease in %		15.9962		3.86885		55.0857
Average of control	45.1		50.8333		46.6667			t-test	p=0.1025		p=0.6397		p<0.0001

## Sheet: Figure 2J, K, L
Figure 2J, K, L - Analysis of gaps area, STD of area of gaps and gaps circularity
Same source images (so, same animals)
	Area of gaps								% of littermate control
	Yap Control	Yap KO	Taz Control	Taz KO	Y/T Control	Y/T KO			Yap Control	Yap KO	Taz Control	Taz KO	Y/T Control	Y/T KO
	6985.24	7598.24	6120.21	7479.23	6861.3	12949			104.7	113.888	101.49	124.026	108.33	204.447
	6360.92	6631.39	5754.94	5949.89	5233.01	12682.7			95.3423	99.3962	95.4327	98.6654	82.6218	200.242
	6579.84	6961.59	5721.05	6132.59	5450.19	10810.7			98.6235	104.345	94.8708	101.695	86.0507	170.685
	6424.04	9606.51	6654.28	6042.74	6495.58	16477.9			96.2883	143.99	110.346	100.205	102.556	260.162
	6425.58	11831.9	6522.91	7086.47	7359.55	13779.4			96.3114	177.345	108.168	117.513	116.197	217.558
	7054.58	11493	5491.55	6666.79	6015.16				105.739	172.265	91.065	110.554	94.9709
	6714.58	7757.42	5947.6	7847.34	6921.04				100.643	116.274	98.6276	130.13	109.273
	6828.61			9240.89					102.352			153.239
n animals	8	7	7	8	7	5		Mean	100	132.5	100	117.004	100	210.619
								STD	3.99906	32.204	7.12819	18.6292	12.5574	32.5697
Average of control	6671.67		6030.36		6333.69			Increase		32.5004		17.0035		110.619
								t-test	p=0.0138		p=0.0412		p<0.0001
	STD of area of gaps								STD of area of gaps - % of littermate control
	Yap Control	Yap KO	Taz Control	Taz KO	Y/T Control	Y/T KO			Yap Control	Yap KO	Taz Control	Taz KO	Y/T Control	Y/T KO
	9016.56	7401.36	6214.56	8490.36	8313.26	14589.8			118.633	97.3814	98.2457	134.224	118.468	207.912
	7325.06	6535.24	5627.37	5594.19	5502.53	14781.7			96.3775	85.9857	88.9629	88.4383	78.4137	210.646
	7153.65	7201.61	6058.3	5976.89	4829.35	12434.1			94.1223	94.7532	95.7754	94.4884	68.8206	177.192
	7800.72	10163	7082.94	6304.2	6435.03	20784.1			102.636	133.718	111.974	99.6627	91.7022	296.183
	6780.97	12688.4	7332.93	8302.47	8657.65	14623			89.2188	166.945	115.926	131.253	123.376	208.385
	7554.27	12199.2	5542.18	5882.76	7222				99.3933	160.508	87.6161	93.0003	102.917
	7546.62	10288.8	6420.42	8991.38	8161.34				99.2927	135.372	101.5	142.144	116.303
	7625.2			10539.2					100.326			166.613
								Mean	100	124.952	100	118.728	100	220.063
Average of control	7600.38		6325.53		7017.31			STD	8.61076	32.6688	10.7654	28.7072	21.0901	44.7349
								Increase		24.9518		18.728		120.063
								t-test	p=0.0569		p=0.1286		p<0.0001
	STD of circularity of gaps								STD of circularity of gaps - % of littermate control
	Yap Control	Yap KO	Taz Control	Taz KO	Y/T Control	Y/T KO			Yap Control	Yap KO	Taz Control	Taz KO	Y/T Control	Y/T KO
	0.520428	0.664225	0.984336	0.872748	0.678491	0.90375			54.7015	69.8158	72.5439	64.32	96.5035	128.543
	0.564004	0.528308	0.796331	0.894717	0.738237	1.1808			59.2816	55.5297	58.6882	65.939	105.002	167.948
	0.58507	0.563097	1.16145	0.923911	0.736118	0.987223			61.4959	59.1863	85.597	68.0906	104.7	140.415
	0.497067	1.26565	1.07976	1.06271	0.846542	1.53317			52.246	133.031	79.5764	78.3202	120.406	218.067
	0.425265	1.73056	2.18988	1.85323	0.764173	1.23018			44.6991	181.897	161.39	136.579	108.69	174.972
	1.17286	1.94338	1.72663	3.39111	0.581017				123.278	204.266	127.249	249.919	82.6397
	2.0631	1.64066	1.55981	1.8651	0.576933				216.85	172.447	114.955	137.454	82.0588
	1.78338			2.6029					187.449			191.829
								Mean	100	125.168	100	124.056	100	165.989
Average of control	0.951397		1.35688		0.703073			STD	68.0064	63.2966	36.1017	68.5991	13.9912	34.8313
								Increase		25.1675		24.0565		65.9891
								t-test	p=0.4735		p=0.4215		p=0.0010
