# Supplementary material for: YAP and TAZ regulate adherens junction dynamics and endothelial cell distribution during vascular development
Source: eLife. 2018 Feb 5;7:e31037. doi: 10.7554/eLife.31037 (PMC5814147; doi:10.7554/eLife.31037)
Supplement: Figure 3—source data 1. — Each value corresponds to the average of several measurements for one animal (see Material and methods for details). Values for quantification of endothelial proliferation in vitro in response to VEGF (Figure 3G) and stretch (Figure 3H) in YAP, TAZ and YAPTAZ knockdown cells. [file elife-31037-fig3-data1.xlsx]

## Sheet: Figure 3C
Figure 3C - Quantification of endothelial proliferation in vivo
	Proliferation - Erg + EdU + cells/ vessel area								Proliferation - Erg + EdU + cells/ vessel area - % of littermate control
	Yap Control	Yap KO	Taz Control	Taz KO	Y/T Control	Y/T KO			Yap Control	Yap KO	Taz Control	Taz KO	Y/T Control	Y/T KO
	Yap Wt	Yap KO	Taz WT	Taz KO	Double WT	Double KO			107.388	83.1099	103.928	97.8487	91.829	84.4557
	0.000674175	0.00052176	0.000845328	0.000795883	0.00073809	0.000678826			108.897	61.3982	98.8165	81.3256	119.884	88.9052
	0.000683648	0.000385455	0.000803755	0.000661487	0.000963587	0.00071459			83.7157	81.8537	95.8277	106.333	105.05	64.6625
	0.000525563	0.000513874	0.000779445	0.000864891	0.000844357	0.000519735				77.0208	94.6592	97.1933	91.3852	34.4747
		0.000483533	0.00076994	0.000790552	0.000734523	0.000277096					106.769	109.873	104.337	28.3408
			0.000868439	0.000893684	0.000838623	0.000227794							105.512	73.4574
					0.000848072	0.000590426							83.7446	93.3288
					0.000673111	0.000750146							98.2581
					0.000789766
n animals	3	4	5	5	8	7		Mean	100	75.8456	100	98.5146	100	66.8036
								STD	14.1228	9.98292	5.21005	11.0429	11.2015	26.0674
								Decrease		24.1544		1.4854		33.1964
Average of control	0.000627795		0.000813381		0.000803766			t-test	p=0.0469		p=0.7925		p=0.0059
YAP									TAZ	MEASURED VALUES				Proliferating EC's per µm2 vascular area				YAPTAZ	MEASURED VALUES				Proliferating EC's per µm2 vascular area
	MEASURED VALUES				Proliferating EC's per µm2 vascular area					# ECs: Erg (+) MANUAL COUNT	# proliferating EC's: Erg (+) AND EdU (+) - Manual count	Vascular area in sq µm (Ib4)	Vascularized area sq um	Per image	Average per animal	Genotype		Double KO 1	# ECs: Erg (+) MANUAL COUNT	# proliferating EC's: Erg (+) AND EdU (+) - Manual count	Vascular area in sq µm (Ib4)	Vascularized area sq um	Per image	Average per animal	Genotype
	# ECs: Erg (+) MANUAL COUNT	# proliferating EC's: Erg (+) AND EdU (+) - Manual count	Vascular area in sq µm (Ib4)	Vascularized area sq um	Per image	Average per animal	Genotype		B59 - 13/07/2015 - P1 - 1	95	30	32228.2	75639.5	0.000930861	0.000795883	KO		B74 - 10/09/2015 - P1A-1	157	30	44731.2	135220	0.000670673	0.00073809	WT
B1225 -Litter 7 - P1A - 1	111	27	42318	108222	0.000638026	0.00052176	WT		B59 - 13/07/2015 - P1 - 2	113	29	32241.1	68483.1	0.000899472				B74 - 10/09/2015 - P1A-2	151	31	50514.4	136011	0.000613686
B1225 -Litter 7 - P1A - 2	117	21	50551.5	118945	0.000415418				B59 - 13/07/2015 - P1 - 3	117	20	31285	70910.7	0.000639285				B74 - 10/09/2015 - P1A-3	135	33	49109.5	131251	0.000671967
B1225 -Litter 7 - P1A - 3	126	25	46503	118684	0.0005376				B59 - 13/07/2015 - P1 - 4	75	19	26613.8	60321.5	0.000713916				B74 - 10/09/2015 - P1A-4	161	54	54215	124603	0.000996035
B1225 -Litter 7 - P1B- 1	142	23	46371.3	126332	0.000495996				B59 - 13/07/2015 - P2 - 1	69	20	27071.3	62912.6	0.000738789	0.000845328	WT		B74 - 10/09/2015 - P3A-1	186	21	48446.9	129998	0.000433464	0.000678826	KO
B1225 -Litter 7 - P3A - 1	153	28	53741.1	124693	0.000521017	0.000385455	KO		B59 - 13/07/2015 - P2 - 2	104	28	22665.9	48522.9	0.00123533				B74 - 10/09/2015 - P3A-2	163	40	52538	119502	0.000761354
B1225 -Litter 7 - P3A - 2	108	11	53741.1	131173	0.000204685				B59 - 13/07/2015 - P2 - 3	125	27	34902.4	74183.9	0.000773585				B74 - 10/09/2015 - P3A-3	157	30	54632	136613	0.000549128
B1225 -Litter 7 - P3A - 3	175	22	57876.5	132877	0.00038012				B59 - 13/07/2015 - P2 - 4	87	20	31565.5	56153.2	0.000633604				B74 - 10/09/2015 - P3A-4	158	48	49415.4	118880	0.000971356
B1225 -Litter 7 - P3B - 1	108	18	41284.7	109122	0.000435997				B59 - 13/07/2015 - P3 - 1	126	24	36155.1	61829.7	0.000663807	0.000803755	WT		B74 - 10/09/2015 - P5A - 1	100	16	36785.5	112012	0.000434954	0.00071459	KO
B1225 -Litter 7 - P4A - 1	142	29	54304.3	121706	0.000534028	0.000513874	KO		B59 - 13/07/2015 - P3 - 2	68	20	24379.5	54455.8	0.000820363				B74 - 10/09/2015 - P5A - 2	167	39	43387.5	115838	0.000898877
B1225 -Litter 7 - P4A - 2	136	34	62847.3	131087	0.000540994				B59 - 13/07/2015 - P3 - 3	83	25	33673.8	76541.1	0.000742418				B74 - 10/09/2015 - P5A - 3	161	35	50710.9	110703	0.000690187
B1225 -Litter 7 - P4A - 3	168	37	68356.5	141765	0.00054128				B59 - 13/07/2015 - P3 - 4	102	39	39456.5	66159.8	0.000988431				B74 - 10/09/2015 - P5A - 4	209	47	56331.8	135244	0.000834343
B1225 -Litter 7 - P4B - 1	125	25	56922.4	133958	0.000439194				B59 - 13/07/2015 - P6 - 1	86	19	31866.3	67974.2	0.000596241	0.000661487	KO		B74 - 16/10/2015 - P2A-1	109	31	28830.4	70431.9	0.00107525	0.000789766	WT
B1225 -Litter 7 - P5A - 1	123	25	46730.5	119723	0.000534983	0.000674175	WT		B59 - 13/07/2015 - P6 - 2	77	20	28348.2	69103.5	0.000705512				B74 - 16/10/2015 - P2A-2	87	15	25714.5	55414.3	0.000583327
B1225 -Litter 7 - P5A - 2	179	47	66319.5	121458	0.00070869				B59 - 13/07/2015 - P6 - 3	98	12	25242.3	65287.8	0.000475392				B74 - 16/10/2015 - P2A-3	83	15	29979	69940.4	0.000500351
B1225 -Litter 7 - P5A - 3	171	31	49407.9	121118	0.00062743				B59 - 13/07/2015 - P6 - 4	118	32	36832.3	72756.9	0.000868802				B74 - 16/10/2015 - P2A-4	96	30	29996.1	65922.9	0.00100013
B1225 -Litter 7 - P5B - 1	157	48	58139.8	108473	0.000825596				B59 - 13/08/2015 - P1A - 1	55	20	27484.8	59013.8	0.000727676	0.000864891	KO		B74 - 10/09/2015 - P3A-1	106	24	42732.7	64938.1	0.000561631	0.000590426	KO
B1225 -Litter 7 - P6A - 1	147	40	59793.5	122300	0.000668969	0.000683648	WT		B59 - 13/08/2015 - P1A - 2	101	32	27897.4	75219.5	0.00114706				B74 - 10/09/2015 - P3A-2	85	23	35220.6	75335	0.000653027
B1225 -Litter 7 - P6A - 2	167	39	49340.3	125704	0.000790428				B59 - 13/08/2015 - P1A - 3	105	29	27516	71917.1	0.00105393				B74 - 10/09/2015 - P3A-3	158	26	45479.6	75359.4	0.000571685
B1225 -Litter 7 - P6A - 3	145	32	62427.5	137013	0.000512595				B59 - 13/08/2015 - P1B - 1	70	14	26370.5	64718.5	0.000530897				B74 - 10/09/2015 - P3A-4	115	19	33022.8	64442.8	0.00057536
B1225 -Litter 7 - P6B - 1	148	40	52452	116124	0.000762602				B59 - 13/08/2015 - P2A - 1	95	21	33022.2	72457.3	0.000635935	0.000779445	WT		B74 - 10/09/2015 - P4A - 1	130	30	43565	62432.4	0.000688627	0.000750146	KO
B1225 -Litter 7 - P7A - 1	120	28	40589.1	102269	0.00068984	0.000483533	KO		B59 - 13/08/2015 - P2A - 2	142	40	45895.4	69576.4	0.000871546				B74 - 10/09/2015 - P4A - 2	93	28	36288.7	63874.6	0.000771591
B1225 -Litter 7 - P7A - 2	132	23	50315.8	124943	0.000457113				B59 - 13/08/2015 - P2A - 3	120	24	29519.4	73437.6	0.000813023				B74 - 10/09/2015 - P4A - 3	125	33	40232.5	70708.5	0.000820233
B1225 -Litter 7 - P7A - 3	133	28	55414.1	102156	0.000505286				B59 - 13/08/2015 - P2B - 1	145	32	40136.7	84146	0.000797275				B74 - 10/09/2015 - P4A - 4	148	29	40270.4	78631.2	0.000720132
B1225 -Litter 7 - P7B - 1	164	16	56759	129840	0.000281893				B59 - 13/08/2015 - P3A - 1	153	31	40910.2	77754	0.000757757	0.00076994	WT		B116 (23102015) - P1A - 1.tif	69	18	28994	60278.3	0.000620819	0.000963587	WT
B1225 -Litter 7 - P8A - 1	129	25	49881.5	96547.2	0.000501188	0.000525563	WT		B59 - 13/08/2015 - P3A - 2	97	20	38277.5	75375.8	0.0005225				B116 (23102015) - P1A - 2.tif	120	29	32532.3	72191.6	0.000891421
B1225 -Litter 7 - P8A - 2	209	37	77719.9	126870	0.000476069				B59 - 13/08/2015 - P3A - 3	102	31	29699.1	73443.4	0.0010438				B116 (23102015) - P1A - 3.tif	116	32	35670.2	67281.9	0.000897106
B1225 -Litter 7 - P8A - 3	157	36	65122.1	109954	0.000552807				B59 - 13/08/2015 - P3B - 1	113	27	35728.4	71063.4	0.000755702				B116 (23102015) - P1A - 4.tif	87	34	23529.4	63335.3	0.001445
B1225 -Litter 7 - P8B - 1	176	43	75150	135230	0.000572189				B59 - 13/08/2015 - P4A - 1	107	43	30365.7	61946.5	0.00141607	0.000868439	WT		B116 (23102015) - P2A - 1.tif	108	27	34518.2	69866	0.000782197	0.000844357	WT
									B59 - 13/08/2015 - P4A - 2	75	25	29593.8	70135.2	0.000844771				B116 (23102015) - P2A - 2.tif	136	29	45371.4	78756.2	0.000639169
									B59 - 13/08/2015 - P4A - 3	95	32	29865.7	68736.4	0.00107146				B116 (23102015) - P2A - 3.tif	97	23	37864.5	70368.6	0.000607429
									B59 - 13/08/2015 - P4B - 1	121	5	35348.1	73987.3	0.00014145				B116 (23102015 - P2A - 4.tif	92	36	26693.7	59892.5	0.00134863
									B59 - 13/08/2015 - P5A - 1	104	27	30356.1	68658.3	0.000889441	0.000790552	KO		B116 (23102015) - P3A - 1.tif	85	11	27020.6	74997.2	0.000407096	0.000519735	KO
									B59 - 13/08/2015 - P5A - 2	98	24	26450.5	71962.5	0.000907355				B116 (23102015) - P3A - 2.tif	61	9	27771.6	63577	0.000324072
									B59 - 13/08/2015 - P5A - 3	107	26	28353.8	61395.5	0.000916985				B116 (23102015) - P3A - 3.tif	68	15	30742.5	63815.6	0.000487924
									B59 - 13/08/2015 - P5B - 1	60	10	22300.2	61880.7	0.000448427				B116 (23102015) - P3A - 4.tif	76	27	31400.9	74922.4	0.000859847
									B59 - 13/08/2015 - P6A - 1	94	19	27490.9	70047.1	0.000691138	0.000893684	KO		B116 (23102015) - P4A - 1.tif	58	6	22339.1	46004.5	0.000268588	0.000277096	KO
									B59 - 13/08/2015 - P6A - 2	91	34	25413.4	74522	0.00133788				B116 (23102015 )- P4A - 2.tif	68	8	20622.7	50861.3	0.000387922
									B59 - 13/08/2015 - P6A - 3	57	17	19649.9	64543.8	0.000865143				B116 (23102015 )- P4A - 3.tif	68	4	28810.2	63486.8	0.00013884
									B59 - 13/08/2015 - P6B - 1	79	16	23509.4	65983.3	0.000680577				B116 (23102015) - P4B - 1.tif	57	8	25556.3	57160.3	0.000313035
																		B116 (23102015) - P5A - 1.tif	111	24	33965.8	70481.6	0.000706593	0.000734523	WT
																		B116 (23102015)- P5A - 2.tif	75	22	25492.1	65792.9	0.000863014
																		B116 (23102015) - P5A - 3.tif	81	18	24659.1	49770.7	0.000729954
																		B116 (23102015) - P5A - 4.tif	61	14	21925.3	60996.2	0.000638532
																		B116 (23102015) - P6A - 1.tif	114	34	40751.9	70752	0.000834317	0.000838623	WT
	MEASURED VALUES				Proliferating EC's per µm2 vascular area													B116 (23102015) - P6A - 2.tif	89	31	30160.3	60515.2	0.00102784
Double KO 1	# ECs: Erg (+) MANUAL COUNT	# proliferating EC's: Erg (+) AND EdU (+) - Manual count	Vascular area in sq µm (Ib4)	Vascularized area sq um	Per image	Average per animal	Genotype											B116 (23102015) - P6A - 3.tif	105	28	33111.6	70130.7	0.000845624
B74 - 10/09/2015 - P1A-1	157	30	44731.2	135220	0.000670673	0.00073809	WT											B116 (23102015) - P6A - 4.tif	95	19	29379.4	66571.6	0.000646711
B74 - 10/09/2015 - P1A-2	151	31	50514.4	136011	0.000613686													B116 - 27/10/2015 - P2A - 1	81	25	24362.9	52809.9	0.00102615	0.000848072	WT
B74 - 10/09/2015 - P1A-3	135	33	49109.5	131251	0.000671967													B116 - 27/10/2015 - P2A - 2	107	32	30621.6	72942.1	0.00104501
B74 - 10/09/2015 - P1A-4	161	54	54215	124603	0.000996035													B116 - 27/10/2015 - P2A - 3	113	21	39135.4	71431.3	0.000536598
B74 - 10/09/2015 - P3A-1	186	21	48446.9	129998	0.000433464	0.000678826	KO											B116 - 27/10/2015 - P2A - 4	89	23	29317	60526.3	0.000784528
B74 - 10/09/2015 - P3A-2	163	40	52538	119502	0.000761354													B116 - 27/10/2015 - P4A - 1	86	23	28294.4	71959.4	0.000812883	0.000673111	WT
B74 - 10/09/2015 - P3A-3	157	30	54632	136613	0.000549128													B116 - 27/10/2015 - P4A - 2	86	19	28963.5	73896.1	0.000655998
B74 - 10/09/2015 - P3A-4	158	48	49415.4	118880	0.000971356													B116 - 27/10/2015 - P4A - 3	100	23	29686.4	74784.1	0.000774765
B74 - 10/09/2015 - P5A - 1	100	16	36785.5	112012	0.000434954	0.00071459	KO											B116 - 27/10/2015 - P4A - 4	79	12	26738.2	72412.3	0.000448797
B74 - 10/09/2015 - P5A - 2	167	39	43387.5	115838	0.000898877													B116 - 27/10/2015 - P6A - 1	65	5	26862.2	70490	0.000186135	0.000227794	KO
B74 - 10/09/2015 - P5A - 3	161	35	50710.9	110703	0.000690187													B116 - 27/10/2015 - P6A - 2	79	13	29123	75349.8	0.000446382
B74 - 10/09/2015 - P5A - 4	209	47	56331.8	135244	0.000834343													B116 - 27/10/2015 - P6A - 3	61	0	29372.2	74011.8	0
B74 - 16/10/2015 - P2A-1	109	31	28830.4	70431.9	0.00107525	0.000789766	WT											B116 - 27/10/2015 - P6B - 2	53	8	28708.8	69233	0.000278661
B74 - 16/10/2015 - P2A-2	87	15	25714.5	55414.3	0.000583327
B74 - 16/10/2015 - P2A-3	83	15	29979	69940.4	0.000500351
B74 - 16/10/2015 - P2A-4	96	30	29996.1	65922.9	0.00100013
B74 - 10/09/2015 - P3A-1	106	24	42732.7	64938.1	0.000561631	0.000590426	KO
B74 - 10/09/2015 - P3A-2	85	23	35220.6	75335	0.000653027
B74 - 10/09/2015 - P3A-3	158	26	45479.6	75359.4	0.000571685
B74 - 10/09/2015 - P3A-4	115	19	33022.8	64442.8	0.00057536
B74 - 10/09/2015 - P4A - 1	130	30	43565	62432.4	0.000688627	0.000750146	KO
B74 - 10/09/2015 - P4A - 2	93	28	36288.7	63874.6	0.000771591
B74 - 10/09/2015 - P4A - 3	125	33	40232.5	70708.5	0.000820233
B74 - 10/09/2015 - P4A - 4	148	29	40270.4	78631.2	0.000720132
B116 (23102015) - P1A - 1.tif	69	18	28994	60278.3	0.000620819	0.000963587	WT
B116 (23102015) - P1A - 2.tif	120	29	32532.3	72191.6	0.000891421
B116 (23102015) - P1A - 3.tif	116	32	35670.2	67281.9	0.000897106
B116 (23102015) - P1A - 4.tif	87	34	23529.4	63335.3	0.001445
B116 (23102015) - P2A - 1.tif	108	27	34518.2	69866	0.000782197	0.000844357	WT
B116 (23102015) - P2A - 2.tif	136	29	45371.4	78756.2	0.000639169
B116 (23102015) - P2A - 3.tif	97	23	37864.5	70368.6	0.000607429
B116 (23102015 - P2A - 4.tif	92	36	26693.7	59892.5	0.00134863
B116 (23102015) - P3A - 1.tif	85	11	27020.6	74997.2	0.000407096	0.000519735	KO
B116 (23102015) - P3A - 2.tif	61	9	27771.6	63577	0.000324072
B116 (23102015) - P3A - 3.tif	68	15	30742.5	63815.6	0.000487924
B116 (23102015) - P3A - 4.tif	76	27	31400.9	74922.4	0.000859847
B116 (23102015) - P4A - 1.tif	58	6	22339.1	46004.5	0.000268588	0.000277096	KO
B116 (23102015 )- P4A - 2.tif	68	8	20622.7	50861.3	0.000387922
B116 (23102015 )- P4A - 3.tif	68	4	28810.2	63486.8	0.00013884
B116 (23102015) - P4B - 1.tif	57	8	25556.3	57160.3	0.000313035
B116 (23102015) - P5A - 1.tif	111	24	33965.8	70481.6	0.000706593	0.000734523	WT
B116 (23102015)- P5A - 2.tif	75	22	25492.1	65792.9	0.000863014
B116 (23102015) - P5A - 3.tif	81	18	24659.1	49770.7	0.000729954
B116 (23102015) - P5A - 4.tif	61	14	21925.3	60996.2	0.000638532
B116 (23102015) - P6A - 1.tif	114	34	40751.9	70752	0.000834317	0.000838623	WT
B116 (23102015) - P6A - 2.tif	89	31	30160.3	60515.2	0.00102784
B116 (23102015) - P6A - 3.tif	105	28	33111.6	70130.7	0.000845624
B116 (23102015) - P6A - 4.tif	95	19	29379.4	66571.6	0.000646711
B116 - 27/10/2015 - P2A - 1	81	25	24362.9	52809.9	0.00102615	0.000848072	WT
B116 - 27/10/2015 - P2A - 2	107	32	30621.6	72942.1	0.00104501
B116 - 27/10/2015 - P2A - 3	113	21	39135.4	71431.3	0.000536598
B116 - 27/10/2015 - P2A - 4	89	23	29317	60526.3	0.000784528
B116 - 27/10/2015 - P4A - 1	86	23	28294.4	71959.4	0.000812883	0.000673111	WT
B116 - 27/10/2015 - P4A - 2	86	19	28963.5	73896.1	0.000655998
B116 - 27/10/2015 - P4A - 3	100	23	29686.4	74784.1	0.000774765
B116 - 27/10/2015 - P4A - 4	79	12	26738.2	72412.3	0.000448797
B116 - 27/10/2015 - P6A - 1	65	5	26862.2	70490	0.000186135	0.000227794	KO
B116 - 27/10/2015 - P6A - 2	79	13	29123	75349.8	0.000446382
B116 - 27/10/2015 - P6A - 3	61	0	29372.2	74011.8	0
B116 - 27/10/2015 - P6B - 2	53	8	28708.8	69233	0.000278661

## Sheet: Figure 3F
Figure 3F - Quantification of apoptosis in vivo
	Apoptosis per area of IB4								Apoptosis per area of IB4 - % of littermate control
	Yap Control	Yap KO	Taz Control	Taz KO	Y/T Control	Y/T KO			Yap Control	Yap KO	Taz Control	Taz KO	Y/T Control	Y/T KO
	1.47612e-05	3.61713e-06	1.03493e-05	1.04445e-05	1.46036e-05	5.05739e-06			146.359	35.8642	98.1623	99.0654	156.337	54.1413
	1.08434e-05	4.92596e-06	9.21076e-06	7.1763e-06	8.2394e-06	6.35687e-06			107.513	48.8414	87.3637	68.067	88.2059	68.0526
	3.58544e-06	3.86003e-06	9.81488e-06	5.46868e-06	6.28285e-06	8.04645e-06			35.55	38.2727	93.0938	51.8702	67.2602	86.1403
	9.21599e-06	3.34589e-06	1.27971e-05	4.50548e-06	1.10164e-05	1.50472e-06			91.3776	33.1748	121.38	42.7343	117.934	16.1086
	7.89497e-06	1.25239e-05			6.56335e-06				78.2796	124.176			70.2631
	1.24817e-05	1.04564e-05							123.758	103.676
	1.18166e-05	8.58023e-06							117.163	85.074
n animals	7	7	4	4	5	4		Mean	100	67.0113	100	65.4342	100	56.1107
								STD	35.9735	36.9898	14.9205	24.7471	37.3856	29.7121
								Decrease		32.9887		34.5658		32.9887
Average of control	1.00856e-05		1.0543e-05		9.34111e-06			t-test	p=0.1165		p=0.0539		p=0.0982
YAP	Area of Ib4 in sq um	# apoptosis figures/retina	Apoptosis figures/area of Ib4	Genotype			TAZ	# apoptosis figures/retina	Area Ib4 sq um	apoptosis per area	Genotype		YAPTAZ	# apoptosis figures/retina	Area of Ib4	Apoptosis figures/area of Ib4	Genotype
C1-MAX_B139 (171115) - CC3 555 Ib4488 - 10x zoom1 zstack 5x5 tilescan - P6.tif	3.04852e+06	45	1.47612e-05	WT			B117 (191115) - CC3 555 Ib4488 - 10x zoom1 zstack 5x5 tilescan - P1-1.tif	27	2.60888e+06	1.03493e-05	WT		B116 (251115) - CC3 555 Ib4488 - 10x zoom1 zstack 5x5 tilescan - P1-1.tif	11	2.17503e+06	5.05739e-06	KO
C1-MAX_B139 (171115) - CC3 555 Ib4488 - 10x zoom1 zstack 5x5 tilescan - P7.tif	2.76462e+06	10	3.61713e-06	KO			B117 (191115) - CC3 555 Ib4488 - 10x zoom1 zstack 5x5 tilescan - P2-1.tif	22	2.38851e+06	9.21076e-06	WT		B116 (251115) - CC3 555 Ib4488 - 10x zoom1 zstack 5x5 tilescan - P2-1.tif	41	2.80753e+06	1.46036e-05	WT
C1-MAX_B139 (171115) - CC3 555 Ib4488 - 10x zoom1 zstack 5x5 tilescan - P8.tif	3.41222e+06	37	1.08434e-05	WT			B117 (191115) - CC3 555 Ib4488 - 10x zoom1 zstack 5x5 tilescan - P3-1.tif	20	1.91489e+06	1.04445e-05	KO		B116 (251115) - CC3 555 Ib4488 - 10x zoom1 zstack 5x5 tilescan - P3-1.tif	11	1.73041e+06	6.35687e-06	KO
							B117 (191115) - CC3 555 Ib4488 - 10x zoom1 zstack 5x5 tilescan - P4-1.tif	27	2.75092e+06	9.81488e-06	WT		B116 (251115) - CC3 555 Ib4488 - 10x zoom1 zstack 5x5 tilescan - P4-1.tif	27	3.27694e+06	8.2394e-06	WT
C1-MAX_B139 (191115) - CC3 555 Ib4488 - 10x zoom1 zstack 5x5 tilescan - P1.tif	3.06796e+06	11	3.58544e-06	WT			B117 (191115) - CC3 555 Ib4488 - 10x zoom1 zstack 5x5 tilescan - P5-1.tif	26	2.03171e+06	1.27971e-05	WT		B116 (251115) - CC3 555 Ib4488 - 10x zoom1 zstack 5x5 tilescan - P5-1.tif	16	2.54662e+06	6.28285e-06	WT
C1-MAX_B139 (191115) - CC3 555 Ib4488 - 10x zoom1 zstack 5x5 tilescan - P2.tif	2.23307e+06	11	4.92596e-06	KO			B117 (191115) - CC3 555 Ib4488 - 10x zoom1 zstack 5x5 tilescan - P6-1.tif	13	1.81152e+06	7.1763e-06	KO		B116 (251115) - CC3 555 Ib4488 - 10x zoom1 zstack 5x5 tilescan - P6-1.tif	16	1.98845e+06	8.04645e-06	KO
C1-MAX_B139 (191115) - CC3 555 Ib4488 - 10x zoom1 zstack 5x5 tilescan - P3.tif	3.1467e+06	29	9.21599e-06	WT			B117 (191115) - CC3 555 Ib4488 - 10x zoom1 zstack 5x5 tilescan - P7-1.tif	10	1.8286e+06	5.46868e-06	KO		B116 (251115) - CC3 555 Ib4488 - 10x zoom1 zstack 5x5 tilescan - P7-1.tif	2	1.32915e+06	1.50472e-06	KO
C1-MAX_B139 (191115) - CC3 555 Ib4488 - 10x zoom1 zstack 5x5 tilescan - P4.tif	2.59065e+06	10	3.86003e-06	KO			B117 (191115) - CC3 555 Ib4488 - 10x zoom1 zstack 5x5 tilescan - P8-1.tif	8	1.77562e+06	4.50548e-06	KO		B116 (251115) - CC3 555 Ib4488 - 10x zoom1 zstack 5x5 tilescan - P8-1.tif	41	3.72174e+06	1.10164e-05	WT
C1-MAX_B139 (191115) - CC3 555 Ib4488 - 10x zoom1 zstack 5x5 tilescan - P5.tif	1.79325e+06	6	3.34589e-06	KO									B116 (251115) - CC3 555 Ib4488 - 10x zoom1 zstack 5x5 tilescan - P9-1.tif	18	2.7425e+06	6.56335e-06	WT
C1-MAX_B97 (241115) - CC3 555 Ib4488 - 10x zoom1 zstack 5x5 tilescan - P1.tif	2.79465e+06	35	1.25239e-05	KO
C1-MAX_B97 (241115) - CC3 555 Ib4488 - 10x zoom1 zstack 5x5 tilescan - P2.tif	3.16657e+06	25	7.89497e-06	WT
C1-MAX_B97 (241115) - CC3 555 Ib4488 - 10x zoom1 zstack 5x5 tilescan - P3.tif	2.64387e+06	33	1.24817e-05	WT
C1-MAX_B97 (241115) - CC3 555 Ib4488 - 10x zoom1 zstack 5x5 tilescan - P4.tif	2.96194e+06	35	1.18166e-05	WT
C1-MAX_B97 (241115) - CC3 555 Ib4488 - 10x zoom1 zstack 5x5 tilescan - P5.tif	3.25161e+06	34	1.04564e-05	KO
C1-MAX_B97 (241115) - CC3 555 Ib4488 - 10x zoom1 zstack 5x5 tilescan - P6.tif	3.37986e+06	29	8.58023e-06	KO

## Sheet: Figure 3G
Figure 3G - Quantification of VEGF induced proliferation in vitro
EXP1	Cells/single cells/Apoptosis | Freq. of Parent (%)	Cells/single cells/G0-G1 | Freq. of Parent (%)	Cells/single cells/G2-M | Freq. of Parent (%)	Cells/single cells/polyploidy | Freq. of Parent (%)	Cells/single cells/S | Freq. of Parent (%)
HUVECs YAP-TAZ VEGF_siCTR VEGF0_001.fcs	0.67	84.2	11	0.91	3.18				% of cells in S phase
HUVECs YAP-TAZ VEGF_siCTR VEGF4_002.fcs	0.91	81.2	12.3	1.48	4.06					0	4	20	100
HUVECs YAP-TAZ VEGF_siCTR VEGF20_003.fcs	1.21	78	14.8	1.48	4.43				siCTR	3.18	4.06	4.43	5.73
HUVECs YAP-TAZ VEGF_siCTR VEGF100_004.fcs	0.97	78.3	13.6	1.45	5.73				siYap	3.05	3.37	5.94	6.44
HUVECs YAP-TAZ VEGF_siTAZ VEGF0_005.fcs	0.25	79.9	15.9	1.38	2.26				siTaz	2.26	2.4	4.26	5.49
HUVECs YAP-TAZ VEGF_siTAZ VEGF4_006.fcs	0.3	78.6	16.8	1.39	2.4				siYapTaz	1.66	2.53	4.64	4.91
HUVECs YAP-TAZ VEGF_siTAZ VEGF20_007.fcs	0.24	77.5	16.3	1.37	4.26
HUVECs YAP-TAZ VEGF_siTAZ VEGF100_008.fcs	0.25	75.7	16.3	1.54	5.49
HUVECs YAP-TAZ VEGF_siTAZ-YAP VEGF0_013.fcs	0.25	84.9	12.7	0.61	1.66
HUVECs YAP-TAZ VEGF_siTAZ-YAP VEGF4_014.fcs	0.34	82.5	14	0.66	2.53
HUVECs YAP-TAZ VEGF_siTAZ-YAP VEGF20_015.fcs	0.16	76.7	17.2	1.18	4.64				Increment of S phase cells with VEGF
HUVECs YAP-TAZ VEGF_siTAZ-YAP VEGF100_016.fcs	0.17	77.4	16.5	0.99	4.91					0	4	20	100
HUVECs YAP-TAZ VEGF_siYAP VEGF0_009.fcs	0.13	82.5	13.4	0.85	3.05				siCTR	1	1.27673	1.39308	1.80189
HUVECs YAP-TAZ VEGF_siYAP VEGF4_010.fcs	0.11	81.1	14.3	0.97	3.37				siYap	1	1.10492	1.94754	2.11148
HUVECs YAP-TAZ VEGF_siYAP VEGF20_011.fcs	0.11	75.4	17	1.2	5.94				siTaz	1	1.06195	1.88496	2.4292
HUVECs YAP-TAZ VEGF_siYAP VEGF100_012.fcs	0.094	76.2	16.2	1.03	6.44				siYapTaz	1	1.5241	2.79518	2.95783
Mean	0.36	79.4	15.1	1.2	3.79
SD	0.29	3.23	1.69	0.49	1.66
EXP2	Cells/single cells/Apoptosis | Freq. of Parent	Cells/single cells/G0-G1 | Freq. of Parent	Cells/single cells/G2-M | Freq. of Parent	Cells/single cells/polyploidy | Freq. of Parent	Cells/single cells/S | Freq. of Parent
HUVECs YAP-TAZ VEGF 3103_siCTR VEGF0_001.fcs	20.0 %	67.1 %	7.03 %	0.73 %	5.43 %				% of cells in S phase
HUVECs YAP-TAZ VEGF 3103_siCTR VEGF4_002.fcs	27.1 %	56.6 %	6.28 %	0.75 %	5.39 %					0	4	20	100
HUVECs YAP-TAZ VEGF 3103_siCTR VEGF20_003.fcs	30.7 %	52.8 %	6.98 %	0.97 %	9.34 %				siCTR	5.43	5.39	9.34	8.64
HUVECs YAP-TAZ VEGF 3103_siCTR VEGF100_004.fcs	7.33 %	76.3 %	7.09 %	0.93 %	8.64 %				siYap	5.48	5.48	11.2	10.7
HUVECs YAP-TAZ VEGF 3103_siTAZ VEGF0_005.fcs	19.1 %	70.6 %	6.29 %	0.64 %	3.38 %				siTaz	3.38	4.6	6.33	6.7
HUVECs YAP-TAZ VEGF 3103_siTAZ VEGF4_006.fcs	18.8 %	70.2 %	5.81 %	0.56 %	4.60 %				siYapTaz	2.89	5.53		10.1
HUVECs YAP-TAZ VEGF 3103_siTAZ VEGF20_007.fcs	15.9 %	63.9 %	8.49 %	0.90 %	6.33 %
HUVECs YAP-TAZ VEGF 3103_siTAZ VEGF100_008.fcs	15.4 %	68.1 %	8.73 %	1.12 %	6.70 %
HUVECs YAP-TAZ VEGF 3103_siTAZ-YAP VEGF0_013.fcs	21.4 %	70.9 %	4.69 %	0.36 %	2.89 %
HUVECs YAP-TAZ VEGF 3103_siTAZ-YAP VEGF4_014.fcs	16.9 %	72.3 %	4.85 %	0.44 %	5.53 %
HUVECs YAP-TAZ VEGF 3103_siTAZ-YAP VEGF20_015.fcs	5.82 %	70.0 %	8.77 %	1.33 %	14.6 %	wrongh FACS			Increment of S phase cells with VEGF
HUVECs YAP-TAZ VEGF 3103_siTAZ-YAP VEGF100_016.fcs	17.8 %	60.2 %	10.8 %	1.06 %	10.1 %					0	4	20	100
HUVECs YAP-TAZ VEGF 3103_siYAP VEGF0_009.fcs	31.6 %	57.3 %	5.08 %	0.49 %	5.48 %				siCTR	1	0.992634	1.72007	1.59116
HUVECs YAP-TAZ VEGF 3103_siYAP VEGF4_010.fcs	33.1 %	60.6 %	4.41 %	0.39 %	5.48 %				siYap	1	1	2.0438	1.95255
HUVECs YAP-TAZ VEGF 3103_siYAP VEGF20_011.fcs	24.3 %	55.6 %	7.99 %	0.58 %	11.2 %				siTaz	1	1.36095	1.87278	1.98225
HUVECs YAP-TAZ VEGF 3103_siYAP VEGF100_012.fcs	16.7 %	61.9 %	10.4 %	0.64 %	10.7 %				siYapTaz	1	1.91349		3.49481
Mean	20.1 %	64.6 %	7.11 %	0.74 %	7.24 %
SD	7.82 %	6.98 %	1.97 %	0.28 %	3.21 %
EXP3	Cells/single cells/Apoptosis | Freq. of Parent	Cells/single cells/G0-G1 | Freq. of Parent	Cells/single cells/G2-M | Freq. of Parent	Cells/single cells/polyploidy | Freq. of Parent	Cells/single cells/S | Freq. of Parent
HUVECs YAP-TAZ VEGF 0304_siCTR VEGF0_025.fcs	30.8 %	55.6 %	6.37 %	0.94 %	6.23 %				% of cells in S phase
HUVECs YAP-TAZ VEGF 0304_siCTR VEGF4_026.fcs	32.3 %	53.7 %	6.47 %	1.00 %	6.48 %					0	4	20	100
HUVECs YAP-TAZ VEGF 0304_siCTR VEGF20_027.fcs	36.9 %	45.8 %	6.52 %	1.32 %	9.47 %				siCTR	6.23	6.48	9.47	8.32
HUVECs YAP-TAZ VEGF 0304_siCTR VEGF100_028.fcs	31.3 %	53.1 %	6.40 %	0.95 %	8.32 %				siYap	6.82	5.39	10.7	10.3
HUVECs YAP-TAZ VEGF 0304_siTAZ VEGF0_029.fcs	27.4 %	60.4 %	5.64 %	0.56 %	6.03 %				siTaz	6.03	5.84	6.32	6.41
HUVECs YAP-TAZ VEGF 0304_siTAZ VEGF4_030.fcs	29.7 %	58.5 %	5.30 %	0.66 %	5.84 %				siYapTaz	4.19	5.85	8.9	9.4
HUVECs YAP-TAZ VEGF 0304_siTAZ VEGF20_031.fcs	29.4 %	56.3 %	5.07 %	0.57 %	6.32 %
HUVECs YAP-TAZ VEGF 0304_siTAZ VEGF100_032.fcs	30.6 %	57.5 %	4.78 %	0.70 %	6.41 %
HUVECs YAP-TAZ VEGF 0304_siTAZ-YAP VEGF0_037.fcs	31.1 %	60.4 %	4.06 %	0.26 %	4.19 %
HUVECs YAP-TAZ VEGF 0304_siTAZ-YAP VEGF4_038.fcs	47.7 %	42.1 %	3.92 %	0.35 %	5.85 %
HUVECs YAP-TAZ VEGF 0304_siTAZ-YAP VEGF20_039.fcs	52.3 %	34.3 %	4.00 %	0.52 %	8.90 %				Increment of S phase cells with VEGF
HUVECs YAP-TAZ VEGF 0304_siTAZ-YAP VEGF100_040.fcs	53.9 %	32.0 %	4.29 %	0.49 %	9.40 %					0	4	20	100
HUVECs YAP-TAZ VEGF 0304_siYAP VEGF0_033.fcs	22.1 %	65.7 %	4.71 %	0.69 %	6.82 %				siCTR	1	1.04013	1.52006	1.33547
HUVECs YAP-TAZ VEGF 0304_siYAP VEGF4_034.fcs	30.4 %	58.8 %	5.05 %	0.44 %	5.39 %				siYap	1	0.790323	1.56891	1.51026
HUVECs YAP-TAZ VEGF 0304_siYAP VEGF20_035.fcs	24.5 %	56.8 %	7.33 %	0.64 %	10.7 %				siTaz	1	0.968491	1.04809	1.06302
HUVECs YAP-TAZ VEGF 0304_siYAP VEGF100_036.fcs	25.8 %	57.0 %	6.32 %	0.55 %	10.3 %				siYapTaz	1	1.39618	2.12411	2.24344
Mean	33.5 %	53.0 %	5.39 %	0.66 %	7.29 %
SD	9.52 %	9.54 %	1.07 %	0.27 %	1.94 %
	S phase %	VEGF0			VEGF4			VEGF20			VEGF100
	CTR	3.18	5.43	6.23	4.06	5.39	6.48	4.43	9.34	9.47	5.73	8.64	8.32
	YAP	3.05	5.48	6.82	3.37	5.48	5.39	5.94	11.2	10.7	6.44	10.7	10.3
	TAZ	2.26	3.38	6.03	2.4	4.6	5.84	4.26	6.33	6.32	5.49	6.7	6.41
	YAPTAZ	1.66	2.89	4.19	2.53	5.53	5.85	4.64		8.9	4.91	10.1	9.4
	Increase in S phase	VEGF0			VEGF4			VEGF20			VEGF100
	CTR	1	1	1	1.27673	0.992634	1.04013	1.39308	1.72007	1.52006	1.80189	1.59116	1.33547
	YAP	1	1	1	1.10492	1	0.790323	1.94754	2.0438	1.56891	2.11148	1.95255	1.51026
	TAZ	1	1	1	1.06195	1.36095	0.968491	1.88496	1.87278	1.04809	2.4292	1.98225	1.06302
	YAPTAZ	1	1	1	1.5241	1.91349	1.39618	2.79518		2.12411	2.95783	3.49481	2.24344

## Sheet: Figure 3H
Figure 3G - Quantification of stretch induced proliferation in vitro
EXP1	ctr (average)	stretch (average)	ctr (STD)	stretch (STD)		ctr (average)	stretch (average)	ctr (STD)	stretch (STD)			fold change
notreat	402	353.667	6.16441	18.0801	notreat	10.2984	24.3262	2.22982	2.10944		notreat	2.36213		cell numbers
siCtr	277.667	226.667	4.6428	9.53357	siCtr	0.472886	3.80686	0.438278	0.396866		siCtr	8.05027		EdUpos - Sphase
siYAP	203.667	202	16.7796	18.0185	siYAP	3.89332	10.7357	0.531915	2.29733		siYAP	2.75747
siTAZ	247.167	217	35.1113	24.9132	siTAZ	1.25222	1.90398	0.87784	0.557425		siTAZ	1.52048
siYAP/TAZ	246.333	157.667	8.17856	14.0554	siYAP/TAZ	0.800112	1.63786	0.547889	0.699634		siYAP/TAZ	2.04704
siVEcadh	105.667	121.667	27.5358	5.18545	siVEcadh	3.66443	2.51828	0.491634	1.8532		siVEcadh	0.687225
EXP2	ctr	stretch				ctr	stretch					fold change
notreat	410	397	22.5536	11.0454	notreat	3.04712	8.60283	0.857373	1.39358		notreat	2.82326
siCtr	269	279.667	13.4907	3.39935	siCtr	0.861048	2.02536	0.127768	0.33		siCtr	2.3522
siYAP	219.333	238.667	6.2361	21.2968	siYAP	4.61876	8.20054	2.19438	3.60271		siYAP	1.77548
siTAZ	296	291.667	13.1403	15.7973	siTAZ	0	2.98872	0	0.429759		siTAZ	2.98872
siYAP/TAZ	238	228	7.78888	4.32049	siYAP/TAZ	0.841258	1.44599	0.0281758	0.868592		siYAP/TAZ	1.71884
siVEcadh	205.333	243	8.73053	10.198	siVEcadh	2.57183	3.76242	0.90186	1.39925		siVEcadh	1.46294
EXP3	ctr	stretch				ctr	stretch					fold change
notreat	367.333	422.333	10.3709	38.3782	notreat	8.4778	12.117	1.36705	3.21833		notreat	1.42927
siCtr	296	247.667	11.0454	8.17856	siCtr	0.338312	2.13428	0.0127009	0.628638		siCtr	6.30861
siYAP	221.333	251	10.6562	11.5758	siYAP	6.56028	10.0282	1.94024	1.40516		siYAP	1.52862
siTAZ	262	288.333	6.16441	10.3387	siTAZ	0.255149	5.1365	0.18064	1.84025		siTAZ	20.1313
siYAP/TAZ	243.333	211.667	12.2837	5.55778	siYAP/TAZ	0.548521	1.72553	0.390056	0.410102		siYAP/TAZ	3.1458
siVEcadh	231	255	8.28654	20.1163	siVEcadh	1.14471	3.5449	0.36966	0.566947		siVEcadh	3.09677
EXP4	ctr	stretch				ctr	stretch					fold change
notreat	361.667	396	17.7451	4.54606	notreat	12.8709	10.3392	1.60681	3.33452		notreat	0.803299
siCtr	266	286.667	15.9374	15.1511	siCtr	0.2331	1.25337	0.329654	0.625339		siCtr	5.37697
siYAP	224.667	217.333	11.2645	12.2565	siYAP	7.79646	15.1451	1.73483	2.97079		siYAP	1.94256
siTAZ	319	307.667	10.8012	9.56847	siTAZ	0.109649	2.19321	0.155067	1.28741		siTAZ	20.002
siYAP/TAZ	251.667	262.333	20.1384	12.9185	siYAP/TAZ	0.238095	1.15096	0.336718	0.322296		siYAP/TAZ	4.83404
siVEcadh	146.333	264	12.4989	32.4448	siVEcadh	6.63776	8.14981	0.471491	1.60183		siVEcadh	1.22779
EXP5	ctr	stretch				ctr	stretch					fold change
notreat	315.667	371.333	21.5149	17.4611	notreat	14.182	16.0628	1.88127	0.989515		notreat	1.13262
siCtr	226.667	200	13.2246	13.9284	siCtr	0.863491	1.75076	0.9028	1.23901		siCtr	2.02753
siYAP	151.667	207	13.0979	5.71548	siYAP	14.0752	13.8708	0.247657	2.23642		siYAP	0.985478
siTAZ	119.333	183.667	23.6972	10.6249	siTAZ	1.26115	5.69836	1.10196	1.89052		siTAZ	4.51837
siYAP/TAZ	151	148	16.5126	28.0832	siYAP/TAZ	1.5551	1.88075	1.20666	0.774031		siYAP/TAZ	1.2094
siVEcadh	122	167	11.8603	4.08248	siVEcadh	0.7621	2.76647	0.597717	1.33287		siVEcadh	3.63007
	ctr	stretch				ctr	stretch					fold change
siCtr	277.667	226.667			siCtr	0.472886	3.80686				siCtr	8.05027
	269	279.667				0.861048	2.02536					2.3522
	296	247.667				0.338312	2.13428					6.30861
	266	286.667				0.2331	1.25337					5.37697
	226.667	200				0.863491	1.75076					2.02753
siYAP	203.667	202			siYAP	3.89332	10.7357				siYAP	2.75747
	219.333	238.667				4.61876	8.20054					1.77548
	221.333	251				6.56028	10.0282					1.52862
	224.667	217.333				7.79646	15.1451					1.94256
	151.667	207				14.0752	13.8708					0.985478
siTAZ	247.167	217			siTAZ	1.25222	1.90398				siTAZ	1.52048
	296	291.667				0	2.98872					2.98872
	262	288.333				0.255149	5.1365					20.1313
	319	307.667				0.109649	2.19321					20.002
	119.333	183.667				1.26115	5.69836					4.51837
siYAP/TAZ	246.333	157.667			siYAP/TAZ	0.800112	1.63786				siYAP/TAZ	2.04704
	238	228				0.841258	1.44599					1.71884
	243.333	211.667				0.548521	1.72553					3.1458
	251.667	262.333				0.238095	1.15096					4.83404
	151	148				1.5551	1.88075					1.2094
siVEcadh	105.667	121.667			siVEcadh	3.66443	2.51828				siVEcadh	0.687225
	205.333	243				2.57183	3.76242					1.46294
	231	255				1.14471	3.5449					3.09677
	146.333	264				6.63776	8.14981					1.22779
	122	167				0.7621	2.76647					3.63007
	ctr	stretch				ctr	stretch					fold change
siCtr	267.067	248.133	22.7444	32.4254	siCtr	0.553767	2.19412	0.263112	0.861923		siCtr	4.82312
siYAP	204.133	223.2	27.2083	18.7529	siYAP	7.38881	11.5961	3.61807	2.54944		siYAP	1.79792
siTAZ	248.7	257.667	69.4181	48.4277	siTAZ	0.575635	3.58415	0.561946	1.54867		siTAZ	9.83219
siYAP/TAZ	226.067	201.533	37.7932	43.1043	siYAP/TAZ	0.796618	1.56822	0.436075	0.251522		siYAP/TAZ	2.59102
siVEcadh	162.067	210.133	48.2859	56.003	siVEcadh	2.95616	4.14838	2.11181	2.05385		siVEcadh	2.02096
