# Supplementary material for: YAP and TAZ regulate adherens junction dynamics and endothelial cell distribution during vascular development
Source: eLife. 2018 Feb 5;7:e31037. doi: 10.7554/eLife.31037 (PMC5814147; doi:10.7554/eLife.31037)
Supplement: Figure 5—source data 1. — Values for quantification of permeability of YAP, TAZ and YAP/TAZ knockdown monolayers of HUVECs to 250 kDa fluorescent dextran molecules (Figure 5G). Values for quantification of VE-Cadherin mEos immobile fraction (Figure 5M) and half-life of fluorescence loss (Figure 5N). [file elife-31037-fig5-data1.xlsx]

## Sheet: Figure 5F
																					Figure 5F - Morphological analysis of VE-Cadherin labelled cell junctions in HUVECs knocked down for YAP, TAZ and YAP/TAZ
ANALYSIS																											Unordered patches classification
Morphological classification
			Counts	% of total patches					Counts	% of total patches					Counts	% of total patches				Counts	% of total patches
siCTR	Straight	Exp1	16	7.23982		siYAP	Straight	Exp1	96	52.7473		siTAZ	Straight	Exp1	22	15.0685		siYapTaz	Straight	Exp1	38	21.8391					0	No junction - not sure - out of focus
		Exp2	26	12.2066				Exp2	138	74.5946				Exp2	21	11.2299				Exp2	49	27.3743					1	Linear
		Exp3	40	18.5185				Exp3	123	75.9259				Exp3						Exp3	83	48.8235					2	Thicker
																											3	Pre-JAIL
	Thick	Exp1	58	26.2443			Thick	Exp1	57	31.3187			Thick	Exp1	26	17.8082			Thick	Exp1	53	30.4598					4	JAIL
		Exp2	48	22.5352				Exp2	27	14.5946				Exp2	56	29.9465				Exp2	37	20.6704					5	Fingers
		Exp3	31	14.3519				Exp3	30	18.5185				Exp3						Exp3	28	16.4706					6	Dots
	Thick-JAIL	Exp1	50	22.6244			Thick-JAIL	Exp1	14	7.69231			Thick-JAIL	Exp1	21	14.3836			Thick-JAIL	Exp1	20	11.4943					Patches classification								Patches solutions
		Exp2	67	31.4554				Exp2	5	2.7027				Exp2	57	30.4813				Exp2	29	16.2011					EXP1				EXP2 and 3				EXP1					EXP2 and 3
		Exp3	50	23.1481				Exp3	2	1.23457				Exp3						Exp3	13	7.64706					Patch number	Morphology classification			Categories:				patch_number	image_name	patch_number_in_image			patch_number	image_name	patch_number_in_image
																											0	1			1	Straight junction			0	VeCad_DAPI_40x8bit_2016_11_07_siYap_1.tif	27			0	Exp2_13317_DAPI_VeCad_Phalloidin_siTaz_4.tif	44
	JAIL	Exp1	92	41.629			JAIL	Exp1	12	6.59341			JAIL	Exp1	39	26.7123			JAIL	Exp1	21	12.069					1	2			2	Thick junction			1	VeCad_DAPI_40x8bit_2016_11_07_siCTR_3.tif	55			1	Exp3_27217_DAPI_VeCad_Phalloidin_siYap_3.tif	16
		Exp2	49	23.0047				Exp2	3	1.62162				Exp2	11	5.88235				Exp2	4	2.23464					2	3			3	Thick/ JAIL			2	VeCad_DAPI_40x8bit_2016_11_07_siTaz_4.tif	45			2	Exp2_13317_DAPI_VeCad_Phalloidin_siTaz_5.tif	33
		Exp3	64	29.6296				Exp3	0	0				Exp3						Exp3	4	2.35294					3	2			4	JAIL			3	VeCad_DAPI_40x8bit_2016_11_07_siYap_4.tif	47			3	Exp2_13317_DAPI_VeCad_Phalloidin_siTaz_1.tif	76
																											4	0			5	Fingers			4	VeCad_DAPI_40x8bit_2016_11_07_siCTR_5.tif	5			4	Exp3_27217_DAPI_VeCad_Phalloidin_siYapTaz_3.tif	55
	Fingers	Exp1	5	2.26244			Fingers	Exp1	3	1.64835			Fingers	Exp1	38	26.0274			Fingers	Exp1	42	24.1379					5	0			0	Don’t know			5	VeCad_DAPI_40x8bit_2016_11_07_siTaz_4.tif	63			5	Exp2_13317_DAPI_VeCad_Phalloidin_siTaz_2.tif	37
		Exp2	23	10.7981				Exp2	12	6.48649				Exp2	42	22.4599				Exp2	60	33.5196					6	3							6	VeCad_DAPI_40x8bit_2016_11_07_siYapTaz_1.tif	25			6	Exp2_13317_DAPI_VeCad_Phalloidin_siYap_2.tif	96
		Exp3	31	14.3519				Exp3	7	4.32099				Exp3						Exp3	42	24.7059					7	2							7	VeCad_DAPI_40x8bit_2016_11_07_siYapTaz_5.tif	92			7	Exp2_13317_DAPI_VeCad_Phalloidin_siYap_4.tif	47
																											8	2			Patch	Category			8	VeCad_DAPI_40x8bit_2016_11_07_siTaz_3.tif	4			8	Exp2_13317_DAPI_VeCad_Phalloidin_siCTR_2.tif	43
																											9	4			0	4			9	VeCad_DAPI_40x8bit_2016_11_07_siTaz_4.tif	81			9	Exp3_27217_DAPI_VeCad_Phalloidin_siYapTaz_3.tif	67
																											10	0			1	1			10	VeCad_DAPI_40x8bit_2016_11_07_siYap_3.tif	98			10	Exp3_27217_DAPI_VeCad_Phalloidin_siCTR_1.tif	66
	Total counts	Exp1	221				Total counts	Exp1	182				Total counts	Exp1	146				Total counts	Exp1	174						11	4			2	3			11	VeCad_DAPI_40x8bit_2016_11_07_siTaz_5.tif	92			11	Exp2_13317_DAPI_VeCad_Phalloidin_siCTR_1.tif	92
		Exp2	213					Exp2	185					Exp2	187					Exp2	179						12	1			3	4			12	VeCad_DAPI_40x8bit_2016_11_07_siYap_5.tif	25			12	Exp3_27217_DAPI_VeCad_Phalloidin_siCTR_1.tif	47
		Exp3	216					Exp3	162					Exp3	0					Exp3	170						13	5			4	2			13	VeCad_DAPI_40x8bit_2016_11_07_siTaz_4.tif	9			13	Exp3_27217_DAPI_VeCad_Phalloidin_siCTR_5.tif	84
																											14	2			5	5			14	VeCad_DAPI_40x8bit_2016_11_07_siTaz_5.tif	35			14	Exp2_13317_DAPI_VeCad_Phalloidin_siCTR_5.tif	47
																											15	3			6	1			15	VeCad_DAPI_40x8bit_2016_11_07_siTaz_4.tif	14			15	Exp2_13317_DAPI_VeCad_Phalloidin_siYapTaz_1.tif	54
																											16	0			7	5			16	VeCad_DAPI_40x8bit_2016_11_07_siYapTaz_1.tif	28			16	Exp3_27217_DAPI_VeCad_Phalloidin_siYap_2.tif	39
																											17	2			8	0			17	VeCad_DAPI_40x8bit_2016_11_07_siCTR_4.tif	64			17	Exp2_13317_DAPI_VeCad_Phalloidin_siTaz_3.tif	95
																											18	5			9	1			18	VeCad_DAPI_40x8bit_2016_11_07_siTaz_5.tif	28			18	Exp3_27217_DAPI_VeCad_Phalloidin_siCTR_2.tif	96
n=	3 independent experiments																										19	2			10	3			19	VeCad_DAPI_40x8bit_2016_11_07_siTaz_3.tif	55			19	Exp2_13317_DAPI_VeCad_Phalloidin_siYap_3.tif	92
	5 images per experiment per condition																										20	6			11	4			20	VeCad_DAPI_40x8bit_2016_11_07_siTaz_3.tif	78			20	Exp2_13317_DAPI_VeCad_Phalloidin_siTaz_5.tif	80
	at least ve-cadherin 140 patches classified per experiment																										21	2			12	4			21	VeCad_DAPI_40x8bit_2016_11_07_siCTR_1.tif	11			21	Exp2_13317_DAPI_VeCad_Phalloidin_siYapTaz_5.tif	13
																											22	2			13	0			22	VeCad_DAPI_40x8bit_2016_11_07_siCTR_5.tif	64			22	Exp2_13317_DAPI_VeCad_Phalloidin_siYap_2.tif	52
																											23	2			14	2			23	VeCad_DAPI_40x8bit_2016_11_07_siYap_1.tif	42			23	Exp2_13317_DAPI_VeCad_Phalloidin_siYap_1.tif	55
																											24	0			15	5			24	VeCad_DAPI_40x8bit_2016_11_07_siYapTaz_5.tif	0			24	Exp2_13317_DAPI_VeCad_Phalloidin_siCTR_5.tif	80
																											25	2			16	1			25	VeCad_DAPI_40x8bit_2016_11_07_siCTR_1.tif	59			25	Exp3_27217_DAPI_VeCad_Phalloidin_siYap_3.tif	91
																											26	3			17	3			26	VeCad_DAPI_40x8bit_2016_11_07_siTaz_1.tif	12			26	Exp2_13317_DAPI_VeCad_Phalloidin_siTaz_4.tif	55
																											27	6			18	3			27	VeCad_DAPI_40x8bit_2016_11_07_siYap_2.tif	25			27	Exp3_27217_DAPI_VeCad_Phalloidin_siCTR_5.tif	1
																											28	4			19	0			28	VeCad_DAPI_40x8bit_2016_11_07_siCTR_1.tif	40			28	Exp3_27217_DAPI_VeCad_Phalloidin_siCTR_3.tif	41
																											29	0			20	0			29	VeCad_DAPI_40x8bit_2016_11_07_siTaz_2.tif	19			29	Exp3_27217_DAPI_VeCad_Phalloidin_siYap_3.tif	21
																											30	4			21	5			30	VeCad_DAPI_40x8bit_2016_11_07_siCTR_1.tif	78			30	Exp3_27217_DAPI_VeCad_Phalloidin_siYap_3.tif	6
																											31	4			22	0			31	VeCad_DAPI_40x8bit_2016_11_07_siTaz_2.tif	64			31	Exp2_13317_DAPI_VeCad_Phalloidin_siYapTaz_5.tif	38
																											32	3			23	1			32	VeCad_DAPI_40x8bit_2016_11_07_siTaz_4.tif	72			32	Exp2_13317_DAPI_VeCad_Phalloidin_siTaz_4.tif	18
																											33	0			24	1			33	VeCad_DAPI_40x8bit_2016_11_07_siTaz_1.tif	81			33	Exp2_13317_DAPI_VeCad_Phalloidin_siTaz_5.tif	41
																											34	1			25	0			34	VeCad_DAPI_40x8bit_2016_11_07_siTaz_3.tif	8			34	Exp3_27217_DAPI_VeCad_Phalloidin_siYap_1.tif	68
																											35	3			26	0			35	VeCad_DAPI_40x8bit_2016_11_07_siTaz_2.tif	46			35	Exp2_13317_DAPI_VeCad_Phalloidin_siYapTaz_4.tif	74
																											36	6			27	0			36	VeCad_DAPI_40x8bit_2016_11_07_siTaz_3.tif	18			36	Exp2_13317_DAPI_VeCad_Phalloidin_siYap_4.tif	70
																											37	0			28	0			37	VeCad_DAPI_40x8bit_2016_11_07_siYapTaz_1.tif	76			37	Exp2_13317_DAPI_VeCad_Phalloidin_siYapTaz_3.tif	53
																											38	2			29	2			38	VeCad_DAPI_40x8bit_2016_11_07_siCTR_2.tif	39			38	Exp2_13317_DAPI_VeCad_Phalloidin_siTaz_1.tif	51
																											39	3			30	0			39	VeCad_DAPI_40x8bit_2016_11_07_siYap_4.tif	49			39	Exp3_27217_DAPI_VeCad_Phalloidin_siYap_3.tif	41
																											40	4			31	0			40	VeCad_DAPI_40x8bit_2016_11_07_siCTR_5.tif	75			40	Exp2_13317_DAPI_VeCad_Phalloidin_siYap_2.tif	37
																											41	2			32	3			41	VeCad_DAPI_40x8bit_2016_11_07_siTaz_3.tif	47			41	Exp3_27217_DAPI_VeCad_Phalloidin_siYap_3.tif	94
																											42	4			33	0			42	VeCad_DAPI_40x8bit_2016_11_07_siYapTaz_3.tif	35			42	Exp3_27217_DAPI_VeCad_Phalloidin_siYapTaz_2.tif	19
																											43	2			34	1			43	VeCad_DAPI_40x8bit_2016_11_07_siCTR_2.tif	54			43	Exp3_27217_DAPI_VeCad_Phalloidin_siYapTaz_1.tif	0
																											44	3			35	5			44	VeCad_DAPI_40x8bit_2016_11_07_siCTR_3.tif	37			44	Exp2_13317_DAPI_VeCad_Phalloidin_siCTR_2.tif	8
																											45	1			36	1			45	VeCad_DAPI_40x8bit_2016_11_07_siYap_1.tif	97			45	Exp2_13317_DAPI_VeCad_Phalloidin_siTaz_5.tif	51
																											46	0			37	2			46	VeCad_DAPI_40x8bit_2016_11_07_siYapTaz_1.tif	86			46	Exp2_13317_DAPI_VeCad_Phalloidin_siYap_2.tif	88
																											47	0			38	2			47	VeCad_DAPI_40x8bit_2016_11_07_siTaz_1.tif	33			47	Exp3_27217_DAPI_VeCad_Phalloidin_siYapTaz_4.tif	75
																											48	3			39	1			48	VeCad_DAPI_40x8bit_2016_11_07_siYapTaz_2.tif	61			48	Exp3_27217_DAPI_VeCad_Phalloidin_siYap_1.tif	44
																											49	0			40	2			49	VeCad_DAPI_40x8bit_2016_11_07_siYapTaz_2.tif	9			49	Exp2_13317_DAPI_VeCad_Phalloidin_siYap_5.tif	89
																											50	2			41	1			50	VeCad_DAPI_40x8bit_2016_11_07_siTaz_4.tif	69			50	Exp3_27217_DAPI_VeCad_Phalloidin_siYap_5.tif	79
																											51	4			42	5			51	VeCad_DAPI_40x8bit_2016_11_07_siTaz_1.tif	16			51	Exp3_27217_DAPI_VeCad_Phalloidin_siYap_4.tif	96
																											52	2			43	0			52	VeCad_DAPI_40x8bit_2016_11_07_siYap_3.tif	69			52	Exp3_27217_DAPI_VeCad_Phalloidin_siYapTaz_1.tif	84
																											53	3			44	0			53	VeCad_DAPI_40x8bit_2016_11_07_siCTR_5.tif	8			53	Exp3_27217_DAPI_VeCad_Phalloidin_siYapTaz_1.tif	41
																											54	4			45	0			54	VeCad_DAPI_40x8bit_2016_11_07_siTaz_2.tif	41			54	Exp3_27217_DAPI_VeCad_Phalloidin_siYap_3.tif	20
																											55	4			46	1			55	VeCad_DAPI_40x8bit_2016_11_07_siCTR_2.tif	0			55	Exp2_13317_DAPI_VeCad_Phalloidin_siTaz_1.tif	82
																											56	0			47	5			56	VeCad_DAPI_40x8bit_2016_11_07_siYap_4.tif	60			56	Exp2_13317_DAPI_VeCad_Phalloidin_siTaz_2.tif	23
																											57	3			48	0			57	VeCad_DAPI_40x8bit_2016_11_07_siYap_1.tif	70			57	Exp2_13317_DAPI_VeCad_Phalloidin_siCTR_5.tif	33
																											58	1			49	0			58	VeCad_DAPI_40x8bit_2016_11_07_siTaz_4.tif	62			58	Exp3_27217_DAPI_VeCad_Phalloidin_siYapTaz_2.tif	20
																											59	2			50	1			59	VeCad_DAPI_40x8bit_2016_11_07_siCTR_3.tif	28			59	Exp3_27217_DAPI_VeCad_Phalloidin_siYapTaz_5.tif	22
																											60	0			51	0			60	VeCad_DAPI_40x8bit_2016_11_07_siYapTaz_2.tif	81			60	Exp3_27217_DAPI_VeCad_Phalloidin_siCTR_1.tif	8
																											61	2			52	1			61	VeCad_DAPI_40x8bit_2016_11_07_siYap_5.tif	15			61	Exp3_27217_DAPI_VeCad_Phalloidin_siCTR_5.tif	80
																											62	1			53	1			62	VeCad_DAPI_40x8bit_2016_11_07_siYapTaz_5.tif	29			62	Exp2_13317_DAPI_VeCad_Phalloidin_siTaz_3.tif	37
																											63	1			54	1			63	VeCad_DAPI_40x8bit_2016_11_07_siYap_1.tif	66			63	Exp3_27217_DAPI_VeCad_Phalloidin_siCTR_4.tif	84
																											64	2			55	3			64	VeCad_DAPI_40x8bit_2016_11_07_siYap_5.tif	42			64	Exp2_13317_DAPI_VeCad_Phalloidin_siYap_5.tif	16
																											65	4			56	3			65	VeCad_DAPI_40x8bit_2016_11_07_siCTR_1.tif	15			65	Exp2_13317_DAPI_VeCad_Phalloidin_siTaz_3.tif	4
																											66	3			57	5			66	VeCad_DAPI_40x8bit_2016_11_07_siCTR_3.tif	83			66	Exp2_13317_DAPI_VeCad_Phalloidin_siYapTaz_1.tif	36
																											67	1			58	0			67	VeCad_DAPI_40x8bit_2016_11_07_siTaz_1.tif	65			67	Exp3_27217_DAPI_VeCad_Phalloidin_siYap_2.tif	70
																											68	1			59	0			68	VeCad_DAPI_40x8bit_2016_11_07_siYap_2.tif	59			68	Exp3_27217_DAPI_VeCad_Phalloidin_siYapTaz_3.tif	60
																											69	0			60	0			69	VeCad_DAPI_40x8bit_2016_11_07_siYap_3.tif	89			69	Exp3_27217_DAPI_VeCad_Phalloidin_siYap_5.tif	88
																											70	1			61	3			70	VeCad_DAPI_40x8bit_2016_11_07_siYapTaz_3.tif	14			70	Exp2_13317_DAPI_VeCad_Phalloidin_siYap_3.tif	36
																											71	2			62	0			71	VeCad_DAPI_40x8bit_2016_11_07_siYapTaz_5.tif	17			71	Exp2_13317_DAPI_VeCad_Phalloidin_siYap_3.tif	33
																											72	2			63	0			72	VeCad_DAPI_40x8bit_2016_11_07_siYap_3.tif	14			72	Exp3_27217_DAPI_VeCad_Phalloidin_siYap_2.tif	63
																											73	2			64	0			73	VeCad_DAPI_40x8bit_2016_11_07_siYapTaz_5.tif	8			73	Exp3_27217_DAPI_VeCad_Phalloidin_siYap_5.tif	15
																											74	2			65	0			74	VeCad_DAPI_40x8bit_2016_11_07_siYap_2.tif	12			74	Exp2_13317_DAPI_VeCad_Phalloidin_siTaz_4.tif	6
																											75	1			66	1			75	VeCad_DAPI_40x8bit_2016_11_07_siYap_5.tif	88			75	Exp2_13317_DAPI_VeCad_Phalloidin_siYapTaz_4.tif	57
																											76	1			67	2			76	VeCad_DAPI_40x8bit_2016_11_07_siYap_4.tif	0			76	Exp3_27217_DAPI_VeCad_Phalloidin_siYap_4.tif	19
																											77	3			68	0			77	VeCad_DAPI_40x8bit_2016_11_07_siCTR_5.tif	69			77	Exp2_13317_DAPI_VeCad_Phalloidin_siYapTaz_3.tif	82
																											78	4			69	0			78	VeCad_DAPI_40x8bit_2016_11_07_siTaz_2.tif	36			78	Exp2_13317_DAPI_VeCad_Phalloidin_siYapTaz_1.tif	59
																											79	3			70	0			79	VeCad_DAPI_40x8bit_2016_11_07_siYap_1.tif	36			79	Exp2_13317_DAPI_VeCad_Phalloidin_siCTR_4.tif	47
																											80	0			71	1			80	VeCad_DAPI_40x8bit_2016_11_07_siCTR_5.tif	94			80	Exp2_13317_DAPI_VeCad_Phalloidin_siTaz_2.tif	38
																											81	3			72	0			81	VeCad_DAPI_40x8bit_2016_11_07_siCTR_5.tif	42			81	Exp3_27217_DAPI_VeCad_Phalloidin_siYap_5.tif	2
																											82	2			73	1			82	VeCad_DAPI_40x8bit_2016_11_07_siCTR_4.tif	18			82	Exp2_13317_DAPI_VeCad_Phalloidin_siCTR_1.tif	17
																											83	4			74	3			83	VeCad_DAPI_40x8bit_2016_11_07_siCTR_2.tif	91			83	Exp2_13317_DAPI_VeCad_Phalloidin_siCTR_1.tif	64
																											84	0			75	0			84	VeCad_DAPI_40x8bit_2016_11_07_siTaz_2.tif	74			84	Exp2_13317_DAPI_VeCad_Phalloidin_siCTR_5.tif	0
																											85	1			76	5			85	VeCad_DAPI_40x8bit_2016_11_07_siYap_1.tif	16			85	Exp3_27217_DAPI_VeCad_Phalloidin_siYap_4.tif	34
																											86	2			77	0			86	VeCad_DAPI_40x8bit_2016_11_07_siCTR_2.tif	73			86	Exp3_27217_DAPI_VeCad_Phalloidin_siYap_1.tif	21
																											87	1			78	1			87	VeCad_DAPI_40x8bit_2016_11_07_siYap_4.tif	42			87	Exp3_27217_DAPI_VeCad_Phalloidin_siYap_3.tif	35
																											88	0			79	3			88	VeCad_DAPI_40x8bit_2016_11_07_siYapTaz_2.tif	68			88	Exp3_27217_DAPI_VeCad_Phalloidin_siCTR_3.tif	70
																											89	0			80	0			89	VeCad_DAPI_40x8bit_2016_11_07_siYap_3.tif	5			89	Exp2_13317_DAPI_VeCad_Phalloidin_siYapTaz_4.tif	49
																											90	4			81	0			90	VeCad_DAPI_40x8bit_2016_11_07_siTaz_1.tif	74			90	Exp2_13317_DAPI_VeCad_Phalloidin_siYap_1.tif	92
																											91	0			82	0			91	VeCad_DAPI_40x8bit_2016_11_07_siTaz_2.tif	59			91	Exp3_27217_DAPI_VeCad_Phalloidin_siYapTaz_5.tif	37
																											92	2			83	1			92	VeCad_DAPI_40x8bit_2016_11_07_siYapTaz_5.tif	21			92	Exp3_27217_DAPI_VeCad_Phalloidin_siYapTaz_2.tif	92
																											93	4			84	0			93	VeCad_DAPI_40x8bit_2016_11_07_siTaz_1.tif	46			93	Exp2_13317_DAPI_VeCad_Phalloidin_siCTR_5.tif	72
																											94	4			85	1			94	VeCad_DAPI_40x8bit_2016_11_07_siTaz_2.tif	97			94	Exp3_27217_DAPI_VeCad_Phalloidin_siYapTaz_1.tif	56
																											95	0			86	0			95	VeCad_DAPI_40x8bit_2016_11_07_siYapTaz_3.tif	36			95	Exp2_13317_DAPI_VeCad_Phalloidin_siTaz_5.tif	15
																											96	5			87	1			96	VeCad_DAPI_40x8bit_2016_11_07_siYapTaz_2.tif	62			96	Exp3_27217_DAPI_VeCad_Phalloidin_siCTR_4.tif	1
																											97	6			88	0			97	VeCad_DAPI_40x8bit_2016_11_07_siYapTaz_3.tif	74			97	Exp2_13317_DAPI_VeCad_Phalloidin_siTaz_3.tif	44
																											98	2			89	0			98	VeCad_DAPI_40x8bit_2016_11_07_siYapTaz_3.tif	81			98	Exp2_13317_DAPI_VeCad_Phalloidin_siYapTaz_1.tif	97
																											99	6			90	0			99	VeCad_DAPI_40x8bit_2016_11_07_siYap_2.tif	84			99	Exp3_27217_DAPI_VeCad_Phalloidin_siYapTaz_4.tif	16
																											100	1			91	0			100	VeCad_DAPI_40x8bit_2016_11_07_siYap_2.tif	21			100	Exp2_13317_DAPI_VeCad_Phalloidin_siYap_4.tif	42
																											101	5			92	0			101	VeCad_DAPI_40x8bit_2016_11_07_siYapTaz_5.tif	6			101	Exp2_13317_DAPI_VeCad_Phalloidin_siYap_5.tif	38
																											102	2			93	0			102	VeCad_DAPI_40x8bit_2016_11_07_siYap_5.tif	23			102	Exp3_27217_DAPI_VeCad_Phalloidin_siYap_2.tif	73
																											103	3			94	0			103	VeCad_DAPI_40x8bit_2016_11_07_siCTR_4.tif	16			103	Exp3_27217_DAPI_VeCad_Phalloidin_siCTR_4.tif	11
																											104	0			95	4			104	VeCad_DAPI_40x8bit_2016_11_07_siYapTaz_5.tif	57			104	Exp2_13317_DAPI_VeCad_Phalloidin_siYap_1.tif	49
																											105	2			96	1			105	VeCad_DAPI_40x8bit_2016_11_07_siCTR_3.tif	98			105	Exp2_13317_DAPI_VeCad_Phalloidin_siYap_1.tif	78
																											106	3			97	2			106	VeCad_DAPI_40x8bit_2016_11_07_siCTR_5.tif	55			106	Exp3_27217_DAPI_VeCad_Phalloidin_siYap_5.tif	42
																											107	4			98	0			107	VeCad_DAPI_40x8bit_2016_11_07_siTaz_5.tif	62			107	Exp3_27217_DAPI_VeCad_Phalloidin_siCTR_1.tif	67
																											108	1			99	1			108	VeCad_DAPI_40x8bit_2016_11_07_siTaz_5.tif	25			108	Exp2_13317_DAPI_VeCad_Phalloidin_siYap_3.tif	62
																											109	0			100	0			109	VeCad_DAPI_40x8bit_2016_11_07_siYapTaz_3.tif	37			109	Exp2_13317_DAPI_VeCad_Phalloidin_siYap_5.tif	12
																											110	1			101	2			110	VeCad_DAPI_40x8bit_2016_11_07_siYap_2.tif	7			110	Exp2_13317_DAPI_VeCad_Phalloidin_siYapTaz_4.tif	73
																											111	4			102	0			111	VeCad_DAPI_40x8bit_2016_11_07_siTaz_4.tif	58			111	Exp3_27217_DAPI_VeCad_Phalloidin_siYap_3.tif	92
																											112	2			103	4			112	VeCad_DAPI_40x8bit_2016_11_07_siYapTaz_3.tif	69			112	Exp2_13317_DAPI_VeCad_Phalloidin_siYapTaz_2.tif	30
																											113	4			104	3			113	VeCad_DAPI_40x8bit_2016_11_07_siYap_4.tif	51			113	Exp3_27217_DAPI_VeCad_Phalloidin_siYap_4.tif	95
																											114	0			105	2			114	VeCad_DAPI_40x8bit_2016_11_07_siYapTaz_1.tif	83			114	Exp3_27217_DAPI_VeCad_Phalloidin_siYapTaz_5.tif	84
																											115	4			106	0			115	VeCad_DAPI_40x8bit_2016_11_07_siYap_3.tif	28			115	Exp3_27217_DAPI_VeCad_Phalloidin_siYap_1.tif	60
																											116	1			107	3			116	VeCad_DAPI_40x8bit_2016_11_07_siYap_5.tif	49			116	Exp3_27217_DAPI_VeCad_Phalloidin_siYapTaz_3.tif	35
																											117	0			108	3			117	VeCad_DAPI_40x8bit_2016_11_07_siTaz_1.tif	56			117	Exp2_13317_DAPI_VeCad_Phalloidin_siYapTaz_2.tif	90
																											118	2			109	0			118	VeCad_DAPI_40x8bit_2016_11_07_siCTR_3.tif	16			118	Exp2_13317_DAPI_VeCad_Phalloidin_siCTR_2.tif	64
																											119	1			110	1			119	VeCad_DAPI_40x8bit_2016_11_07_siYap_2.tif	26			119	Exp2_13317_DAPI_VeCad_Phalloidin_siYapTaz_2.tif	29
																											120	0			111	1			120	VeCad_DAPI_40x8bit_2016_11_07_siYap_2.tif	35			120	Exp3_27217_DAPI_VeCad_Phalloidin_siYap_1.tif	35
																											121	4			112	4			121	VeCad_DAPI_40x8bit_2016_11_07_siCTR_5.tif	15			121	Exp2_13317_DAPI_VeCad_Phalloidin_siTaz_2.tif	59
																											122	3			113	1			122	VeCad_DAPI_40x8bit_2016_11_07_siCTR_4.tif	28			122	Exp3_27217_DAPI_VeCad_Phalloidin_siYap_5.tif	52
																											123	0			114	3			123	VeCad_DAPI_40x8bit_2016_11_07_siTaz_5.tif	64			123	Exp2_13317_DAPI_VeCad_Phalloidin_siYapTaz_2.tif	38
																											124	1			115	5			124	VeCad_DAPI_40x8bit_2016_11_07_siYapTaz_2.tif	2			124	Exp3_27217_DAPI_VeCad_Phalloidin_siYapTaz_1.tif	87
																											125	4			116	2			125	VeCad_DAPI_40x8bit_2016_11_07_siYapTaz_3.tif	63			125	Exp3_27217_DAPI_VeCad_Phalloidin_siCTR_3.tif	64
																											126	4			117	0			126	VeCad_DAPI_40x8bit_2016_11_07_siCTR_4.tif	96			126	Exp2_13317_DAPI_VeCad_Phalloidin_siTaz_4.tif	5
																											127	1			118	2			127	VeCad_DAPI_40x8bit_2016_11_07_siYap_5.tif	92			127	Exp3_27217_DAPI_VeCad_Phalloidin_siYapTaz_2.tif	77
																											128	3			119	5			128	VeCad_DAPI_40x8bit_2016_11_07_siYapTaz_1.tif	24			128	Exp2_13317_DAPI_VeCad_Phalloidin_siTaz_5.tif	38
																											129	0			120	2			129	VeCad_DAPI_40x8bit_2016_11_07_siTaz_2.tif	87			129	Exp3_27217_DAPI_VeCad_Phalloidin_siYapTaz_3.tif	94
																											130	4			121	0			130	VeCad_DAPI_40x8bit_2016_11_07_siTaz_2.tif	11			130	Exp2_13317_DAPI_VeCad_Phalloidin_siYap_5.tif	41
																											131	0			122	0			131	VeCad_DAPI_40x8bit_2016_11_07_siYapTaz_5.tif	56			131	Exp2_13317_DAPI_VeCad_Phalloidin_siYap_1.tif	42
																											132	0			123	1			132	VeCad_DAPI_40x8bit_2016_11_07_siTaz_2.tif	91			132	Exp2_13317_DAPI_VeCad_Phalloidin_siYapTaz_4.tif	58
																											133	3			124	5			133	VeCad_DAPI_40x8bit_2016_11_07_siCTR_2.tif	21			133	Exp3_27217_DAPI_VeCad_Phalloidin_siYapTaz_5.tif	73
																											134	4			125	5			134	VeCad_DAPI_40x8bit_2016_11_07_siCTR_1.tif	96			134	Exp3_27217_DAPI_VeCad_Phalloidin_siCTR_1.tif	11
																											135	2			126	0			135	VeCad_DAPI_40x8bit_2016_11_07_siCTR_3.tif	24			135	Exp3_27217_DAPI_VeCad_Phalloidin_siYap_4.tif	68
																											136	5			127	1			136	VeCad_DAPI_40x8bit_2016_11_07_siTaz_5.tif	56			136	Exp2_13317_DAPI_VeCad_Phalloidin_siCTR_1.tif	48
																											137	2			128	0			137	VeCad_DAPI_40x8bit_2016_11_07_siTaz_5.tif	99			137	Exp2_13317_DAPI_VeCad_Phalloidin_siYapTaz_1.tif	42
																											138	2			129	0			138	VeCad_DAPI_40x8bit_2016_11_07_siTaz_2.tif	65			138	Exp3_27217_DAPI_VeCad_Phalloidin_siYapTaz_2.tif	27
																											139	4			130	0			139	VeCad_DAPI_40x8bit_2016_11_07_siCTR_5.tif	77			139	Exp2_13317_DAPI_VeCad_Phalloidin_siYapTaz_4.tif	30
																											140	4			131	0			140	VeCad_DAPI_40x8bit_2016_11_07_siYapTaz_1.tif	77			140	Exp2_13317_DAPI_VeCad_Phalloidin_siCTR_4.tif	2
																											141	0			132	2			141	VeCad_DAPI_40x8bit_2016_11_07_siYap_1.tif	48			141	Exp2_13317_DAPI_VeCad_Phalloidin_siYapTaz_4.tif	23
																											142	3			133	1			142	VeCad_DAPI_40x8bit_2016_11_07_siCTR_3.tif	87			142	Exp3_27217_DAPI_VeCad_Phalloidin_siYapTaz_2.tif	1
																											143	1			134	3			143	VeCad_DAPI_40x8bit_2016_11_07_siYap_2.tif	64			143	Exp2_13317_DAPI_VeCad_Phalloidin_siCTR_3.tif	45
																											144	0			135	1			144	VeCad_DAPI_40x8bit_2016_11_07_siTaz_5.tif	13			144	Exp2_13317_DAPI_VeCad_Phalloidin_siYapTaz_1.tif	1
																											145	2			136	2			145	VeCad_DAPI_40x8bit_2016_11_07_siYapTaz_4.tif	6			145	Exp2_13317_DAPI_VeCad_Phalloidin_siCTR_3.tif	79
																											146	4			137	5			146	VeCad_DAPI_40x8bit_2016_11_07_siYapTaz_1.tif	65			146	Exp3_27217_DAPI_VeCad_Phalloidin_siCTR_1.tif	56
																											147	3			138	0			147	VeCad_DAPI_40x8bit_2016_11_07_siCTR_4.tif	11			147	Exp3_27217_DAPI_VeCad_Phalloidin_siCTR_5.tif	7
																											148	5			139	0			148	VeCad_DAPI_40x8bit_2016_11_07_siYapTaz_5.tif	30			148	Exp3_27217_DAPI_VeCad_Phalloidin_siCTR_5.tif	78
																											149	4			140	3			149	VeCad_DAPI_40x8bit_2016_11_07_siCTR_2.tif	16			149	Exp2_13317_DAPI_VeCad_Phalloidin_siYapTaz_4.tif	53
																											150	1			141	2			150	VeCad_DAPI_40x8bit_2016_11_07_siYap_4.tif	48			150	Exp3_27217_DAPI_VeCad_Phalloidin_siCTR_1.tif	26
																											151	4			142	0			151	VeCad_DAPI_40x8bit_2016_11_07_siTaz_1.tif	34			151	Exp2_13317_DAPI_VeCad_Phalloidin_siYapTaz_3.tif	29
																											152	0			143	4			152	VeCad_DAPI_40x8bit_2016_11_07_siTaz_1.tif	28			152	Exp2_13317_DAPI_VeCad_Phalloidin_siYap_4.tif	28
																											153	0			144	5			153	VeCad_DAPI_40x8bit_2016_11_07_siTaz_2.tif	93			153	Exp3_27217_DAPI_VeCad_Phalloidin_siYapTaz_3.tif	90
																											154	0			145	2			154	VeCad_DAPI_40x8bit_2016_11_07_siYapTaz_4.tif	31			154	Exp2_13317_DAPI_VeCad_Phalloidin_siTaz_1.tif	50
																											155	3			146	3			155	VeCad_DAPI_40x8bit_2016_11_07_siCTR_2.tif	17			155	Exp2_13317_DAPI_VeCad_Phalloidin_siYapTaz_2.tif	40
																											156	5			147	3			156	VeCad_DAPI_40x8bit_2016_11_07_siYapTaz_5.tif	83			156	Exp2_13317_DAPI_VeCad_Phalloidin_siYap_1.tif	90
																											157	4			148	4			157	VeCad_DAPI_40x8bit_2016_11_07_siTaz_5.tif	63			157	Exp2_13317_DAPI_VeCad_Phalloidin_siYapTaz_1.tif	57
																											158	0			149	1			158	VeCad_DAPI_40x8bit_2016_11_07_siYap_4.tif	7			158	Exp3_27217_DAPI_VeCad_Phalloidin_siYap_2.tif	33
																											159	2			150	4			159	VeCad_DAPI_40x8bit_2016_11_07_siCTR_2.tif	4			159	Exp2_13317_DAPI_VeCad_Phalloidin_siYap_4.tif	13
																											160	3			151	5			160	VeCad_DAPI_40x8bit_2016_11_07_siCTR_4.tif	10			160	Exp2_13317_DAPI_VeCad_Phalloidin_siTaz_4.tif	57
																											161	4			152	2			161	VeCad_DAPI_40x8bit_2016_11_07_siTaz_1.tif	92			161	Exp2_13317_DAPI_VeCad_Phalloidin_siTaz_4.tif	36
																											162	2			153	2			162	VeCad_DAPI_40x8bit_2016_11_07_siYap_2.tif	8			162	Exp3_27217_DAPI_VeCad_Phalloidin_siYap_5.tif	50
																											163	0			154	3			163	VeCad_DAPI_40x8bit_2016_11_07_siYap_3.tif	66			163	Exp3_27217_DAPI_VeCad_Phalloidin_siYapTaz_4.tif	82
																											164	4			155	5			164	VeCad_DAPI_40x8bit_2016_11_07_siTaz_5.tif	98			164	Exp2_13317_DAPI_VeCad_Phalloidin_siCTR_5.tif	6
																											165	0			156	1			165	VeCad_DAPI_40x8bit_2016_11_07_siYapTaz_2.tif	95			165	Exp3_27217_DAPI_VeCad_Phalloidin_siCTR_1.tif	60
																											166	3			157	0			166	VeCad_DAPI_40x8bit_2016_11_07_siYapTaz_3.tif	40			166	Exp3_27217_DAPI_VeCad_Phalloidin_siYap_5.tif	54
																											167	5			158	0			167	VeCad_DAPI_40x8bit_2016_11_07_siTaz_4.tif	35			167	Exp3_27217_DAPI_VeCad_Phalloidin_siYap_5.tif	14
																											168	0			159	1			168	VeCad_DAPI_40x8bit_2016_11_07_siTaz_1.tif	53			168	Exp2_13317_DAPI_VeCad_Phalloidin_siYapTaz_5.tif	96
																											169	2			160	5			169	VeCad_DAPI_40x8bit_2016_11_07_siCTR_5.tif	4			169	Exp2_13317_DAPI_VeCad_Phalloidin_siTaz_1.tif	12
																											170	0			161	0			170	VeCad_DAPI_40x8bit_2016_11_07_siTaz_4.tif	24			170	Exp3_27217_DAPI_VeCad_Phalloidin_siCTR_5.tif	17
																											171	0			162	2			171	VeCad_DAPI_40x8bit_2016_11_07_siCTR_1.tif	53			171	Exp2_13317_DAPI_VeCad_Phalloidin_siYapTaz_2.tif	1
																											172	0			163	0			172	VeCad_DAPI_40x8bit_2016_11_07_siYapTaz_5.tif	31			172	Exp3_27217_DAPI_VeCad_Phalloidin_siCTR_3.tif	22
																											173	4			164	3			173	VeCad_DAPI_40x8bit_2016_11_07_siTaz_3.tif	5			173	Exp3_27217_DAPI_VeCad_Phalloidin_siYapTaz_3.tif	68
																											174	2			165	4			174	VeCad_DAPI_40x8bit_2016_11_07_siYapTaz_3.tif	45			174	Exp3_27217_DAPI_VeCad_Phalloidin_siYap_4.tif	77
																											175	1			166	1			175	VeCad_DAPI_40x8bit_2016_11_07_siCTR_4.tif	37			175	Exp3_27217_DAPI_VeCad_Phalloidin_siYapTaz_5.tif	67
																											176	4			167	1			176	VeCad_DAPI_40x8bit_2016_11_07_siCTR_1.tif	47			176	Exp3_27217_DAPI_VeCad_Phalloidin_siYap_2.tif	89
																											177	4			168	0			177	VeCad_DAPI_40x8bit_2016_11_07_siCTR_4.tif	74			177	Exp2_13317_DAPI_VeCad_Phalloidin_siYap_2.tif	59
																											178	3			169	3			178	VeCad_DAPI_40x8bit_2016_11_07_siTaz_3.tif	96			178	Exp2_13317_DAPI_VeCad_Phalloidin_siCTR_1.tif	16
																											179	2			170	3			179	VeCad_DAPI_40x8bit_2016_11_07_siYapTaz_1.tif	90			179	Exp3_27217_DAPI_VeCad_Phalloidin_siCTR_1.tif	12
																											180	1			171	1			180	VeCad_DAPI_40x8bit_2016_11_07_siYap_2.tif	61			180	Exp3_27217_DAPI_VeCad_Phalloidin_siCTR_4.tif	39
																											181	0			172	2			181	VeCad_DAPI_40x8bit_2016_11_07_siTaz_1.tif	0			181	Exp2_13317_DAPI_VeCad_Phalloidin_siTaz_3.tif	71
																											182	0			173	1			182	VeCad_DAPI_40x8bit_2016_11_07_siYapTaz_4.tif	85			182	Exp3_27217_DAPI_VeCad_Phalloidin_siYapTaz_4.tif	33
																											183	5			174	1			183	VeCad_DAPI_40x8bit_2016_11_07_siTaz_5.tif	39			183	Exp3_27217_DAPI_VeCad_Phalloidin_siCTR_4.tif	57
																											184	4			175	2			184	VeCad_DAPI_40x8bit_2016_11_07_siCTR_3.tif	30			184	Exp2_13317_DAPI_VeCad_Phalloidin_siCTR_2.tif	7
																											185	5			176	1			185	VeCad_DAPI_40x8bit_2016_11_07_siTaz_3.tif	6			185	Exp2_13317_DAPI_VeCad_Phalloidin_siTaz_5.tif	19
																											186	1			177	0			186	VeCad_DAPI_40x8bit_2016_11_07_siYap_1.tif	50			186	Exp2_13317_DAPI_VeCad_Phalloidin_siTaz_3.tif	64
																											187	0			178	2			187	VeCad_DAPI_40x8bit_2016_11_07_siYapTaz_1.tif	23			187	Exp3_27217_DAPI_VeCad_Phalloidin_siYapTaz_5.tif	17
																											188	0			179	4			188	VeCad_DAPI_40x8bit_2016_11_07_siYap_3.tif	49			188	Exp2_13317_DAPI_VeCad_Phalloidin_siYap_4.tif	60
																											189	4			180	4	5		189	VeCad_DAPI_40x8bit_2016_11_07_siCTR_3.tif	63			189	Exp2_13317_DAPI_VeCad_Phalloidin_siCTR_3.tif	56
																											190	0			181	2			190	VeCad_DAPI_40x8bit_2016_11_07_siTaz_1.tif	27			190	Exp3_27217_DAPI_VeCad_Phalloidin_siYapTaz_3.tif	93
																											191	4			182	1			191	VeCad_DAPI_40x8bit_2016_11_07_siCTR_4.tif	65			191	Exp3_27217_DAPI_VeCad_Phalloidin_siCTR_3.tif	89
																											192	1			183	3			192	VeCad_DAPI_40x8bit_2016_11_07_siYap_5.tif	52			192	Exp3_27217_DAPI_VeCad_Phalloidin_siYapTaz_1.tif	45
																											193	1			184	5	1		193	VeCad_DAPI_40x8bit_2016_11_07_siTaz_5.tif	81			193	Exp2_13317_DAPI_VeCad_Phalloidin_siYapTaz_1.tif	91
																											194	3			185	3			194	VeCad_DAPI_40x8bit_2016_11_07_siCTR_2.tif	80			194	Exp2_13317_DAPI_VeCad_Phalloidin_siYap_3.tif	98
																											195	0			186	2			195	VeCad_DAPI_40x8bit_2016_11_07_siYapTaz_3.tif	11			195	Exp2_13317_DAPI_VeCad_Phalloidin_siYap_4.tif	68
																											196	1			187	0			196	VeCad_DAPI_40x8bit_2016_11_07_siYap_3.tif	82			196	Exp2_13317_DAPI_VeCad_Phalloidin_siYap_5.tif	63
																											197	2			188	1			197	VeCad_DAPI_40x8bit_2016_11_07_siYap_2.tif	6			197	Exp2_13317_DAPI_VeCad_Phalloidin_siCTR_4.tif	95
																											198	0			189	3			198	VeCad_DAPI_40x8bit_2016_11_07_siYapTaz_2.tif	85			198	Exp2_13317_DAPI_VeCad_Phalloidin_siCTR_1.tif	30
																											199	2			190	2			199	VeCad_DAPI_40x8bit_2016_11_07_siTaz_5.tif	91			199	Exp3_27217_DAPI_VeCad_Phalloidin_siYap_5.tif	40
																											200	2			191	0			200	VeCad_DAPI_40x8bit_2016_11_07_siYapTaz_4.tif	99			200	Exp3_27217_DAPI_VeCad_Phalloidin_siYap_4.tif	66
																											201	0			192	0			201	VeCad_DAPI_40x8bit_2016_11_07_siTaz_1.tif	1			201	Exp2_13317_DAPI_VeCad_Phalloidin_siYapTaz_4.tif	12
																											202	3			193	1			202	VeCad_DAPI_40x8bit_2016_11_07_siTaz_3.tif	41			202	Exp2_13317_DAPI_VeCad_Phalloidin_siCTR_5.tif	57
																											203	4			194	0			203	VeCad_DAPI_40x8bit_2016_11_07_siYap_1.tif	94			203	Exp2_13317_DAPI_VeCad_Phalloidin_siYapTaz_3.tif	85
																											204	3			195	2			204	VeCad_DAPI_40x8bit_2016_11_07_siYap_5.tif	24			204	Exp3_27217_DAPI_VeCad_Phalloidin_siCTR_2.tif	64
																											205	5			196	0			205	VeCad_DAPI_40x8bit_2016_11_07_siTaz_3.tif	45			205	Exp2_13317_DAPI_VeCad_Phalloidin_siYap_1.tif	35
																											206	2			197	0			206	VeCad_DAPI_40x8bit_2016_11_07_siYap_3.tif	29			206	Exp3_27217_DAPI_VeCad_Phalloidin_siYapTaz_4.tif	28
																											207	2			198	4			207	VeCad_DAPI_40x8bit_2016_11_07_siCTR_4.tif	90			207	Exp2_13317_DAPI_VeCad_Phalloidin_siCTR_3.tif	66
																											208	0			199	1			208	VeCad_DAPI_40x8bit_2016_11_07_siCTR_3.tif	49			208	Exp3_27217_DAPI_VeCad_Phalloidin_siCTR_1.tif	72
																											209	3			200	1			209	VeCad_DAPI_40x8bit_2016_11_07_siCTR_2.tif	30			209	Exp2_13317_DAPI_VeCad_Phalloidin_siTaz_3.tif	5
																											210	0			201	0			210	VeCad_DAPI_40x8bit_2016_11_07_siTaz_5.tif	12			210	Exp3_27217_DAPI_VeCad_Phalloidin_siCTR_4.tif	64
																											211	0			202	3			211	VeCad_DAPI_40x8bit_2016_11_07_siTaz_3.tif	9			211	Exp2_13317_DAPI_VeCad_Phalloidin_siYapTaz_2.tif	7
																											212	5			203	1			212	VeCad_DAPI_40x8bit_2016_11_07_siTaz_4.tif	98			212	Exp2_13317_DAPI_VeCad_Phalloidin_siTaz_5.tif	24
																											213	1			204	4			213	VeCad_DAPI_40x8bit_2016_11_07_siCTR_1.tif	28			213	Exp2_13317_DAPI_VeCad_Phalloidin_siCTR_1.tif	26
																											214	6			205	3			214	VeCad_DAPI_40x8bit_2016_11_07_siYap_5.tif	93			214	Exp2_13317_DAPI_VeCad_Phalloidin_siYapTaz_5.tif	69
																											215	0			206	0			215	VeCad_DAPI_40x8bit_2016_11_07_siYapTaz_1.tif	99			215	Exp2_13317_DAPI_VeCad_Phalloidin_siCTR_1.tif	6
																											216	2			207	5			216	VeCad_DAPI_40x8bit_2016_11_07_siYapTaz_2.tif	65			216	Exp2_13317_DAPI_VeCad_Phalloidin_siYap_5.tif	40
																											217	2			208	5	3		217	VeCad_DAPI_40x8bit_2016_11_07_siYapTaz_1.tif	70			217	Exp3_27217_DAPI_VeCad_Phalloidin_siYapTaz_3.tif	98
																											218	2			209	2			218	VeCad_DAPI_40x8bit_2016_11_07_siCTR_2.tif	8			218	Exp3_27217_DAPI_VeCad_Phalloidin_siYap_2.tif	27
																											219	4			210	5			219	VeCad_DAPI_40x8bit_2016_11_07_siCTR_5.tif	86			219	Exp2_13317_DAPI_VeCad_Phalloidin_siYapTaz_2.tif	44
																											220	2			211	2	1		220	VeCad_DAPI_40x8bit_2016_11_07_siCTR_1.tif	41			220	Exp3_27217_DAPI_VeCad_Phalloidin_siYap_2.tif	15
																											221	5			212	2			221	VeCad_DAPI_40x8bit_2016_11_07_siYap_4.tif	93			221	Exp2_13317_DAPI_VeCad_Phalloidin_siYapTaz_3.tif	54
																											222	5			213	2			222	VeCad_DAPI_40x8bit_2016_11_07_siTaz_1.tif	60			222	Exp3_27217_DAPI_VeCad_Phalloidin_siYapTaz_4.tif	6
																											223	4			214	5			223	VeCad_DAPI_40x8bit_2016_11_07_siYapTaz_1.tif	87			223	Exp3_27217_DAPI_VeCad_Phalloidin_siCTR_1.tif	54
																											224	0			215	0			224	VeCad_DAPI_40x8bit_2016_11_07_siTaz_3.tif	27			224	Exp2_13317_DAPI_VeCad_Phalloidin_siYap_3.tif	69
																											225	5			216	1			225	VeCad_DAPI_40x8bit_2016_11_07_siCTR_3.tif	84			225	Exp3_27217_DAPI_VeCad_Phalloidin_siYap_4.tif	10
																											226	0			217	1			226	VeCad_DAPI_40x8bit_2016_11_07_siYap_3.tif	64			226	Exp3_27217_DAPI_VeCad_Phalloidin_siCTR_3.tif	32
																											227	4			218	0			227	VeCad_DAPI_40x8bit_2016_11_07_siCTR_2.tif	28			227	Exp2_13317_DAPI_VeCad_Phalloidin_siYapTaz_1.tif	79
																											228	0			219	0			228	VeCad_DAPI_40x8bit_2016_11_07_siYap_3.tif	22			228	Exp3_27217_DAPI_VeCad_Phalloidin_siCTR_5.tif	81
																											229	0			220	0			229	VeCad_DAPI_40x8bit_2016_11_07_siCTR_1.tif	45			229	Exp2_13317_DAPI_VeCad_Phalloidin_siCTR_4.tif	60
																											230	0			221	0			230	VeCad_DAPI_40x8bit_2016_11_07_siTaz_1.tif	58			230	Exp2_13317_DAPI_VeCad_Phalloidin_siYap_5.tif	59
																											231	5			222	5			231	VeCad_DAPI_40x8bit_2016_11_07_siTaz_5.tif	55			231	Exp2_13317_DAPI_VeCad_Phalloidin_siYap_1.tif	64
																											232	1			223	0			232	VeCad_DAPI_40x8bit_2016_11_07_siTaz_3.tif	0			232	Exp2_13317_DAPI_VeCad_Phalloidin_siYapTaz_3.tif	20
																											233	2			224	1			233	VeCad_DAPI_40x8bit_2016_11_07_siYapTaz_2.tif	16			233	Exp2_13317_DAPI_VeCad_Phalloidin_siYapTaz_1.tif	32
																											234	5			225	0			234	VeCad_DAPI_40x8bit_2016_11_07_siYapTaz_4.tif	92			234	Exp2_13317_DAPI_VeCad_Phalloidin_siCTR_1.tif	41
																											235	1			226	4			235	VeCad_DAPI_40x8bit_2016_11_07_siCTR_2.tif	3			235	Exp2_13317_DAPI_VeCad_Phalloidin_siYapTaz_4.tif	67
																											236	0			227	0			236	VeCad_DAPI_40x8bit_2016_11_07_siCTR_4.tif	95			236	Exp2_13317_DAPI_VeCad_Phalloidin_siCTR_2.tif	67
																											237	1	2		228	4			237	VeCad_DAPI_40x8bit_2016_11_07_siYap_4.tif	11			237	Exp3_27217_DAPI_VeCad_Phalloidin_siYap_2.tif	99
																											238	2			229	0			238	VeCad_DAPI_40x8bit_2016_11_07_siTaz_3.tif	99			238	Exp3_27217_DAPI_VeCad_Phalloidin_siCTR_4.tif	12
																											239	1			230	5			239	VeCad_DAPI_40x8bit_2016_11_07_siTaz_5.tif	72			239	Exp2_13317_DAPI_VeCad_Phalloidin_siYapTaz_1.tif	16
																											240	2			231	0			240	VeCad_DAPI_40x8bit_2016_11_07_siYapTaz_4.tif	44			240	Exp3_27217_DAPI_VeCad_Phalloidin_siYapTaz_2.tif	53
																											241	5			232	5			241	VeCad_DAPI_40x8bit_2016_11_07_siTaz_5.tif	83			241	Exp2_13317_DAPI_VeCad_Phalloidin_siYapTaz_3.tif	42
																											242	5			233	0			242	VeCad_DAPI_40x8bit_2016_11_07_siTaz_4.tif	64			242	Exp3_27217_DAPI_VeCad_Phalloidin_siYapTaz_4.tif	51
																											243	2			234	0			243	VeCad_DAPI_40x8bit_2016_11_07_siYapTaz_5.tif	98			243	Exp2_13317_DAPI_VeCad_Phalloidin_siYap_3.tif	20
																											244	4			235	5			244	VeCad_DAPI_40x8bit_2016_11_07_siCTR_1.tif	58			244	Exp3_27217_DAPI_VeCad_Phalloidin_siYapTaz_1.tif	96
																											245	4			236	3			245	VeCad_DAPI_40x8bit_2016_11_07_siYapTaz_1.tif	19			245	Exp2_13317_DAPI_VeCad_Phalloidin_siYapTaz_5.tif	85
																											246	4			237	0			246	VeCad_DAPI_40x8bit_2016_11_07_siCTR_1.tif	1			246	Exp2_13317_DAPI_VeCad_Phalloidin_siCTR_2.tif	45
																											247	3			238	0			247	VeCad_DAPI_40x8bit_2016_11_07_siCTR_2.tif	66			247	Exp2_13317_DAPI_VeCad_Phalloidin_siTaz_3.tif	40
																											248	0			239	2			248	VeCad_DAPI_40x8bit_2016_11_07_siYapTaz_1.tif	82			248	Exp2_13317_DAPI_VeCad_Phalloidin_siTaz_1.tif	45
																											249	2			240	0			249	VeCad_DAPI_40x8bit_2016_11_07_siCTR_2.tif	53			249	Exp3_27217_DAPI_VeCad_Phalloidin_siYap_5.tif	81
																											250	5			241	0			250	VeCad_DAPI_40x8bit_2016_11_07_siYapTaz_5.tif	59			250	Exp2_13317_DAPI_VeCad_Phalloidin_siTaz_1.tif	52
																											251	5			242	0			251	VeCad_DAPI_40x8bit_2016_11_07_siYapTaz_5.tif	65			251	Exp3_27217_DAPI_VeCad_Phalloidin_siCTR_2.tif	3
																											252	4			243	1			252	VeCad_DAPI_40x8bit_2016_11_07_siTaz_3.tif	54			252	Exp2_13317_DAPI_VeCad_Phalloidin_siYap_4.tif	2
																											253	0			244	2			253	VeCad_DAPI_40x8bit_2016_11_07_siYap_5.tif	0			253	Exp2_13317_DAPI_VeCad_Phalloidin_siYap_4.tif	85
																											254	1			245	1			254	VeCad_DAPI_40x8bit_2016_11_07_siTaz_5.tif	49			254	Exp2_13317_DAPI_VeCad_Phalloidin_siYap_5.tif	86
																											255	2			246	2			255	VeCad_DAPI_40x8bit_2016_11_07_siTaz_4.tif	40			255	Exp2_13317_DAPI_VeCad_Phalloidin_siYapTaz_4.tif	55
																											256	0			247	5			256	VeCad_DAPI_40x8bit_2016_11_07_siYap_3.tif	11			256	Exp3_27217_DAPI_VeCad_Phalloidin_siCTR_4.tif	23
																											257	1			248	3			257	VeCad_DAPI_40x8bit_2016_11_07_siYapTaz_2.tif	91			257	Exp3_27217_DAPI_VeCad_Phalloidin_siYapTaz_5.tif	54
																											258	1	6		249	5			258	VeCad_DAPI_40x8bit_2016_11_07_siYap_4.tif	76			258	Exp3_27217_DAPI_VeCad_Phalloidin_siCTR_2.tif	19
																											259	5			250	2			259	VeCad_DAPI_40x8bit_2016_11_07_siTaz_5.tif	4			259	Exp2_13317_DAPI_VeCad_Phalloidin_siCTR_5.tif	78
																											260	5			251	5			260	VeCad_DAPI_40x8bit_2016_11_07_siTaz_3.tif	22			260	Exp3_27217_DAPI_VeCad_Phalloidin_siYap_5.tif	63
																											261	1			252	5			261	VeCad_DAPI_40x8bit_2016_11_07_siYap_1.tif	71			261	Exp3_27217_DAPI_VeCad_Phalloidin_siYapTaz_3.tif	27
																											262	0			253	1			262	VeCad_DAPI_40x8bit_2016_11_07_siYapTaz_5.tif	45			262	Exp3_27217_DAPI_VeCad_Phalloidin_siCTR_1.tif	28
																											263	2			254	0			263	VeCad_DAPI_40x8bit_2016_11_07_siTaz_4.tif	20			263	Exp3_27217_DAPI_VeCad_Phalloidin_siYap_5.tif	17
																											264	3			255	0			264	VeCad_DAPI_40x8bit_2016_11_07_siTaz_5.tif	77			264	Exp2_13317_DAPI_VeCad_Phalloidin_siTaz_4.tif	82
																											265	5			256	2	1		265	VeCad_DAPI_40x8bit_2016_11_07_siYapTaz_1.tif	7			265	Exp2_13317_DAPI_VeCad_Phalloidin_siYap_2.tif	74
																											266	2			257	5			266	VeCad_DAPI_40x8bit_2016_11_07_siYapTaz_5.tif	69			266	Exp2_13317_DAPI_VeCad_Phalloidin_siTaz_4.tif	25
																											267	1			258	0			267	VeCad_DAPI_40x8bit_2016_11_07_siYap_1.tif	37			267	Exp3_27217_DAPI_VeCad_Phalloidin_siYap_2.tif	19
																											268	2			259	4			268	VeCad_DAPI_40x8bit_2016_11_07_siYapTaz_5.tif	58			268	Exp3_27217_DAPI_VeCad_Phalloidin_siYapTaz_3.tif	56
																											269	1			260	2			269	VeCad_DAPI_40x8bit_2016_11_07_siYap_4.tif	92			269	Exp2_13317_DAPI_VeCad_Phalloidin_siTaz_1.tif	44
																											270	4			261	1			270	VeCad_DAPI_40x8bit_2016_11_07_siCTR_4.tif	82			270	Exp3_27217_DAPI_VeCad_Phalloidin_siYap_3.tif	74
																											271	0			262	3			271	VeCad_DAPI_40x8bit_2016_11_07_siTaz_4.tif	89			271	Exp2_13317_DAPI_VeCad_Phalloidin_siYapTaz_3.tif	86
																											272	4			263	0			272	VeCad_DAPI_40x8bit_2016_11_07_siCTR_2.tif	43			272	Exp3_27217_DAPI_VeCad_Phalloidin_siCTR_4.tif	74
																											273	0			264	0			273	VeCad_DAPI_40x8bit_2016_11_07_siTaz_4.tif	88			273	Exp3_27217_DAPI_VeCad_Phalloidin_siYap_1.tif	74
																											274	0			265	2			274	VeCad_DAPI_40x8bit_2016_11_07_siTaz_1.tif	18			274	Exp3_27217_DAPI_VeCad_Phalloidin_siYapTaz_5.tif	5
																											275	0			266	3			275	VeCad_DAPI_40x8bit_2016_11_07_siYapTaz_5.tif	35			275	Exp2_13317_DAPI_VeCad_Phalloidin_siYapTaz_2.tif	42
																											276	2			267	5			276	VeCad_DAPI_40x8bit_2016_11_07_siYap_5.tif	6			276	Exp2_13317_DAPI_VeCad_Phalloidin_siYap_2.tif	7
																											277	1			268	2			277	VeCad_DAPI_40x8bit_2016_11_07_siYapTaz_2.tif	14			277	Exp2_13317_DAPI_VeCad_Phalloidin_siTaz_1.tif	69
																											278	0			269	3			278	VeCad_DAPI_40x8bit_2016_11_07_siTaz_2.tif	27			278	Exp3_27217_DAPI_VeCad_Phalloidin_siCTR_2.tif	86
																											279	3			270	0			279	VeCad_DAPI_40x8bit_2016_11_07_siYapTaz_1.tif	53			279	Exp3_27217_DAPI_VeCad_Phalloidin_siYapTaz_2.tif	41
																											280	0			271	3			280	VeCad_DAPI_40x8bit_2016_11_07_siTaz_2.tif	90			280	Exp2_13317_DAPI_VeCad_Phalloidin_siYap_1.tif	76
																											281	1			272	4			281	VeCad_DAPI_40x8bit_2016_11_07_siYap_1.tif	35			281	Exp3_27217_DAPI_VeCad_Phalloidin_siYap_1.tif	75
																											282	3			273	0			282	VeCad_DAPI_40x8bit_2016_11_07_siCTR_1.tif	16			282	Exp2_13317_DAPI_VeCad_Phalloidin_siYapTaz_2.tif	85
																											283	2			274	5			283	VeCad_DAPI_40x8bit_2016_11_07_siCTR_3.tif	96			283	Exp2_13317_DAPI_VeCad_Phalloidin_siYap_4.tif	93
																											284	4			275	1			284	VeCad_DAPI_40x8bit_2016_11_07_siTaz_4.tif	7			284	Exp2_13317_DAPI_VeCad_Phalloidin_siYap_2.tif	93
																											285	1			276	2			285	VeCad_DAPI_40x8bit_2016_11_07_siYap_3.tif	45			285	Exp2_13317_DAPI_VeCad_Phalloidin_siCTR_3.tif	14
																											286	0			277	0			286	VeCad_DAPI_40x8bit_2016_11_07_siTaz_2.tif	45			286	Exp3_27217_DAPI_VeCad_Phalloidin_siYapTaz_5.tif	72
																											287	4			278	0			287	VeCad_DAPI_40x8bit_2016_11_07_siYapTaz_3.tif	88			287	Exp2_13317_DAPI_VeCad_Phalloidin_siYapTaz_1.tif	7
																											288	1			279	1			288	VeCad_DAPI_40x8bit_2016_11_07_siCTR_5.tif	32			288	Exp3_27217_DAPI_VeCad_Phalloidin_siYapTaz_3.tif	16
																											289	1			280	2			289	VeCad_DAPI_40x8bit_2016_11_07_siYapTaz_2.tif	19			289	Exp2_13317_DAPI_VeCad_Phalloidin_siCTR_2.tif	3
																											290	2			281	1			290	VeCad_DAPI_40x8bit_2016_11_07_siYap_4.tif	69			290	Exp2_13317_DAPI_VeCad_Phalloidin_siYapTaz_4.tif	63
																											291	3			282	2			291	VeCad_DAPI_40x8bit_2016_11_07_siCTR_4.tif	92			291	Exp2_13317_DAPI_VeCad_Phalloidin_siYapTaz_4.tif	51
																											292	0			283	5			292	VeCad_DAPI_40x8bit_2016_11_07_siTaz_2.tif	30			292	Exp3_27217_DAPI_VeCad_Phalloidin_siCTR_1.tif	22
																											293	5			284	1			293	VeCad_DAPI_40x8bit_2016_11_07_siYapTaz_4.tif	7			293	Exp2_13317_DAPI_VeCad_Phalloidin_siTaz_4.tif	35
																											294	4			285	4			294	VeCad_DAPI_40x8bit_2016_11_07_siTaz_2.tif	84			294	Exp2_13317_DAPI_VeCad_Phalloidin_siYap_2.tif	3
																											295	4			286	0			295	VeCad_DAPI_40x8bit_2016_11_07_siCTR_5.tif	43			295	Exp3_27217_DAPI_VeCad_Phalloidin_siYapTaz_3.tif	51
																											296	4			287	3			296	VeCad_DAPI_40x8bit_2016_11_07_siYap_4.tif	27			296	Exp2_13317_DAPI_VeCad_Phalloidin_siTaz_4.tif	52
																											297	3			288	1			297	VeCad_DAPI_40x8bit_2016_11_07_siCTR_5.tif	80			297	Exp2_13317_DAPI_VeCad_Phalloidin_siTaz_3.tif	94
																											298	4			289	0			298	VeCad_DAPI_40x8bit_2016_11_07_siCTR_5.tif	1			298	Exp3_27217_DAPI_VeCad_Phalloidin_siCTR_3.tif	17
																											299	2			290	0			299	VeCad_DAPI_40x8bit_2016_11_07_siYap_5.tif	17			299	Exp3_27217_DAPI_VeCad_Phalloidin_siYap_3.tif	53
																											300	3			291	3			300	VeCad_DAPI_40x8bit_2016_11_07_siYap_1.tif	96			300	Exp3_27217_DAPI_VeCad_Phalloidin_siYap_5.tif	22
																											301	1			292	1			301	VeCad_DAPI_40x8bit_2016_11_07_siYapTaz_2.tif	73			301	Exp2_13317_DAPI_VeCad_Phalloidin_siCTR_2.tif	34
																											302	0			293	5			302	VeCad_DAPI_40x8bit_2016_11_07_siCTR_4.tif	20			302	Exp3_27217_DAPI_VeCad_Phalloidin_siYap_3.tif	68
																											303	4			294	1			303	VeCad_DAPI_40x8bit_2016_11_07_siCTR_1.tif	68			303	Exp2_13317_DAPI_VeCad_Phalloidin_siYapTaz_3.tif	23
																											304	3			295	5			304	VeCad_DAPI_40x8bit_2016_11_07_siCTR_5.tif	63			304	Exp3_27217_DAPI_VeCad_Phalloidin_siYapTaz_5.tif	24
																											305	5			296	1			305	VeCad_DAPI_40x8bit_2016_11_07_siYapTaz_3.tif	56			305	Exp3_27217_DAPI_VeCad_Phalloidin_siYap_5.tif	0
																											306	2			297	3			306	VeCad_DAPI_40x8bit_2016_11_07_siYapTaz_4.tif	63			306	Exp2_13317_DAPI_VeCad_Phalloidin_siYapTaz_1.tif	44
																											307	3			298	4			307	VeCad_DAPI_40x8bit_2016_11_07_siYapTaz_1.tif	98			307	Exp2_13317_DAPI_VeCad_Phalloidin_siTaz_1.tif	20
																											308	2			299	1			308	VeCad_DAPI_40x8bit_2016_11_07_siYapTaz_1.tif	55			308	Exp3_27217_DAPI_VeCad_Phalloidin_siCTR_3.tif	94
																											309	2			300	0			309	VeCad_DAPI_40x8bit_2016_11_07_siYap_3.tif	77			309	Exp3_27217_DAPI_VeCad_Phalloidin_siYapTaz_2.tif	28
																											310	5			301	3			310	VeCad_DAPI_40x8bit_2016_11_07_siYapTaz_1.tif	14			310	Exp3_27217_DAPI_VeCad_Phalloidin_siYapTaz_5.tif	25
																											311	4			302	0			311	VeCad_DAPI_40x8bit_2016_11_07_siTaz_2.tif	47			311	Exp3_27217_DAPI_VeCad_Phalloidin_siYapTaz_3.tif	85
																											312	1			303	5			312	VeCad_DAPI_40x8bit_2016_11_07_siYap_4.tif	44			312	Exp3_27217_DAPI_VeCad_Phalloidin_siYapTaz_1.tif	92
																											313	0			304	1	5		313	VeCad_DAPI_40x8bit_2016_11_07_siYapTaz_2.tif	53			313	Exp3_27217_DAPI_VeCad_Phalloidin_siCTR_5.tif	65
																											314	3			305	2			314	VeCad_DAPI_40x8bit_2016_11_07_siCTR_5.tif	31			314	Exp3_27217_DAPI_VeCad_Phalloidin_siYapTaz_2.tif	0
																											315	4			306	5			315	VeCad_DAPI_40x8bit_2016_11_07_siTaz_5.tif	58			315	Exp3_27217_DAPI_VeCad_Phalloidin_siYap_4.tif	23
																											316	3			307	4			316	VeCad_DAPI_40x8bit_2016_11_07_siTaz_5.tif	52			316	Exp3_27217_DAPI_VeCad_Phalloidin_siYap_5.tif	84
																											317	3			308	0			317	VeCad_DAPI_40x8bit_2016_11_07_siCTR_4.tif	69			317	Exp3_27217_DAPI_VeCad_Phalloidin_siYap_5.tif	8
																											318	4			309	2			318	VeCad_DAPI_40x8bit_2016_11_07_siCTR_3.tif	5			318	Exp2_13317_DAPI_VeCad_Phalloidin_siTaz_2.tif	48
																											319	6			310	0			319	VeCad_DAPI_40x8bit_2016_11_07_siCTR_5.tif	57			319	Exp3_27217_DAPI_VeCad_Phalloidin_siYap_5.tif	60
																											320	1			311	5			320	VeCad_DAPI_40x8bit_2016_11_07_siYap_1.tif	82			320	Exp2_13317_DAPI_VeCad_Phalloidin_siTaz_4.tif	74
																											321	1			312	2			321	VeCad_DAPI_40x8bit_2016_11_07_siYap_3.tif	92			321	Exp3_27217_DAPI_VeCad_Phalloidin_siYapTaz_2.tif	83
																											322	0			313	1			322	VeCad_DAPI_40x8bit_2016_11_07_siYap_3.tif	57			322	Exp2_13317_DAPI_VeCad_Phalloidin_siCTR_4.tif	69
																											323	4			314	5			323	VeCad_DAPI_40x8bit_2016_11_07_siYapTaz_4.tif	45			323	Exp3_27217_DAPI_VeCad_Phalloidin_siYapTaz_4.tif	74
																											324	0			315	0			324	VeCad_DAPI_40x8bit_2016_11_07_siYap_1.tif	9			324	Exp2_13317_DAPI_VeCad_Phalloidin_siTaz_1.tif	24
																											325	4			316	0			325	VeCad_DAPI_40x8bit_2016_11_07_siYap_1.tif	4			325	Exp2_13317_DAPI_VeCad_Phalloidin_siYapTaz_2.tif	62
																											326	0			317	0			326	VeCad_DAPI_40x8bit_2016_11_07_siTaz_1.tif	39			326	Exp3_27217_DAPI_VeCad_Phalloidin_siCTR_5.tif	95
																											327	0			318	0			327	VeCad_DAPI_40x8bit_2016_11_07_siYapTaz_4.tif	16			327	Exp3_27217_DAPI_VeCad_Phalloidin_siCTR_2.tif	73
																											328	4			319	1			328	VeCad_DAPI_40x8bit_2016_11_07_siYap_3.tif	35			328	Exp3_27217_DAPI_VeCad_Phalloidin_siYapTaz_2.tif	81
																											329	1	2		320	5			329	VeCad_DAPI_40x8bit_2016_11_07_siYap_1.tif	76			329	Exp3_27217_DAPI_VeCad_Phalloidin_siYap_2.tif	45
																											330	1			321	2			330	VeCad_DAPI_40x8bit_2016_11_07_siYap_4.tif	98			330	Exp3_27217_DAPI_VeCad_Phalloidin_siCTR_1.tif	29
																											331	1			322	3			331	VeCad_DAPI_40x8bit_2016_11_07_siYap_2.tif	97			331	Exp3_27217_DAPI_VeCad_Phalloidin_siYap_4.tif	82
																											332	1			323	0			332	VeCad_DAPI_40x8bit_2016_11_07_siYap_4.tif	84			332	Exp3_27217_DAPI_VeCad_Phalloidin_siYap_5.tif	29
																											333	0			324	1			333	VeCad_DAPI_40x8bit_2016_11_07_siCTR_2.tif	56			333	Exp3_27217_DAPI_VeCad_Phalloidin_siCTR_3.tif	47
																											334	4			325	2			334	VeCad_DAPI_40x8bit_2016_11_07_siCTR_5.tif	21			334	Exp2_13317_DAPI_VeCad_Phalloidin_siYapTaz_3.tif	6
																											335	0			326	0			335	VeCad_DAPI_40x8bit_2016_11_07_siYap_2.tif	79			335	Exp3_27217_DAPI_VeCad_Phalloidin_siYap_4.tif	30
																											336	4			327	3			336	VeCad_DAPI_40x8bit_2016_11_07_siCTR_1.tif	42			336	Exp2_13317_DAPI_VeCad_Phalloidin_siCTR_1.tif	77
																											337	4			328	1			337	VeCad_DAPI_40x8bit_2016_11_07_siYapTaz_5.tif	63			337	Exp3_27217_DAPI_VeCad_Phalloidin_siCTR_3.tif	38
																											338	3			329	0			338	VeCad_DAPI_40x8bit_2016_11_07_siCTR_3.tif	51			338	Exp3_27217_DAPI_VeCad_Phalloidin_siYapTaz_4.tif	46
																											339	3			330	0			339	VeCad_DAPI_40x8bit_2016_11_07_siYap_1.tif	74			339	Exp2_13317_DAPI_VeCad_Phalloidin_siYap_1.tif	77
																											340	0			331	0			340	VeCad_DAPI_40x8bit_2016_11_07_siTaz_2.tif	55			340	Exp3_27217_DAPI_VeCad_Phalloidin_siYap_3.tif	89
																											341	3			332	1			341	VeCad_DAPI_40x8bit_2016_11_07_siCTR_2.tif	1			341	Exp3_27217_DAPI_VeCad_Phalloidin_siCTR_2.tif	7
																											342	1			333	3			342	VeCad_DAPI_40x8bit_2016_11_07_siYap_2.tif	78			342	Exp2_13317_DAPI_VeCad_Phalloidin_siTaz_4.tif	89
																											343	0			334	5			343	VeCad_DAPI_40x8bit_2016_11_07_siYap_5.tif	56			343	Exp3_27217_DAPI_VeCad_Phalloidin_siYapTaz_4.tif	97
																											344	2			335	1			344	VeCad_DAPI_40x8bit_2016_11_07_siYapTaz_4.tif	33			344	Exp2_13317_DAPI_VeCad_Phalloidin_siTaz_1.tif	19
																											345	2			336	5			345	VeCad_DAPI_40x8bit_2016_11_07_siYapTaz_1.tif	93			345	Exp2_13317_DAPI_VeCad_Phalloidin_siCTR_2.tif	84
																											346	3			337	1			346	VeCad_DAPI_40x8bit_2016_11_07_siCTR_3.tif	79			346	Exp2_13317_DAPI_VeCad_Phalloidin_siYapTaz_1.tif	41
																											347	4			338	1			347	VeCad_DAPI_40x8bit_2016_11_07_siCTR_1.tif	18			347	Exp2_13317_DAPI_VeCad_Phalloidin_siCTR_2.tif	48
																											348	2			339	0			348	VeCad_DAPI_40x8bit_2016_11_07_siYapTaz_5.tif	72			348	Exp2_13317_DAPI_VeCad_Phalloidin_siTaz_5.tif	25
																											349	1			340	0			349	VeCad_DAPI_40x8bit_2016_11_07_siYapTaz_3.tif	83			349	Exp2_13317_DAPI_VeCad_Phalloidin_siTaz_1.tif	38
																											350	0			341	0			350	VeCad_DAPI_40x8bit_2016_11_07_siCTR_4.tif	4			350	Exp3_27217_DAPI_VeCad_Phalloidin_siYapTaz_5.tif	33
																											351	0			342	0			351	VeCad_DAPI_40x8bit_2016_11_07_siYapTaz_4.tif	98			351	Exp3_27217_DAPI_VeCad_Phalloidin_siCTR_1.tif	52
																											352	0			343	5			352	VeCad_DAPI_40x8bit_2016_11_07_siYapTaz_5.tif	89			352	Exp3_27217_DAPI_VeCad_Phalloidin_siYapTaz_5.tif	55
																											353	0			344	0			353	VeCad_DAPI_40x8bit_2016_11_07_siTaz_2.tif	51			353	Exp2_13317_DAPI_VeCad_Phalloidin_siTaz_3.tif	89
																											354	2			345	3			354	VeCad_DAPI_40x8bit_2016_11_07_siTaz_5.tif	96			354	Exp3_27217_DAPI_VeCad_Phalloidin_siCTR_3.tif	6
																											355	3			346	1			355	VeCad_DAPI_40x8bit_2016_11_07_siCTR_4.tif	98			355	Exp3_27217_DAPI_VeCad_Phalloidin_siYap_5.tif	94
																											356	3			347	0			356	VeCad_DAPI_40x8bit_2016_11_07_siCTR_1.tif	6			356	Exp2_13317_DAPI_VeCad_Phalloidin_siYapTaz_1.tif	64
																											357	1			348	0			357	VeCad_DAPI_40x8bit_2016_11_07_siTaz_3.tif	90			357	Exp2_13317_DAPI_VeCad_Phalloidin_siCTR_4.tif	62
																											358	5			349	3			358	VeCad_DAPI_40x8bit_2016_11_07_siCTR_4.tif	66			358	Exp3_27217_DAPI_VeCad_Phalloidin_siCTR_4.tif	66
																											359	5			350	1			359	VeCad_DAPI_40x8bit_2016_11_07_siYapTaz_5.tif	67			359	Exp2_13317_DAPI_VeCad_Phalloidin_siCTR_2.tif	33
																											360	1			351	2			360	VeCad_DAPI_40x8bit_2016_11_07_siYap_5.tif	70			360	Exp3_27217_DAPI_VeCad_Phalloidin_siCTR_1.tif	45
																											361	2			352	1			361	VeCad_DAPI_40x8bit_2016_11_07_siYapTaz_4.tif	96			361	Exp3_27217_DAPI_VeCad_Phalloidin_siCTR_3.tif	39
																											362	2			353	1			362	VeCad_DAPI_40x8bit_2016_11_07_siYap_3.tif	70			362	Exp3_27217_DAPI_VeCad_Phalloidin_siYapTaz_4.tif	1
																											363	0			354	4			363	VeCad_DAPI_40x8bit_2016_11_07_siYapTaz_2.tif	29			363	Exp3_27217_DAPI_VeCad_Phalloidin_siYap_5.tif	39
																											364	2			355	1			364	VeCad_DAPI_40x8bit_2016_11_07_siTaz_3.tif	88			364	Exp3_27217_DAPI_VeCad_Phalloidin_siCTR_3.tif	36
																											365	4			356	2			365	VeCad_DAPI_40x8bit_2016_11_07_siCTR_3.tif	64			365	Exp2_13317_DAPI_VeCad_Phalloidin_siCTR_1.tif	36
																											366	5			357	3			366	VeCad_DAPI_40x8bit_2016_11_07_siYapTaz_5.tif	54			366	Exp3_27217_DAPI_VeCad_Phalloidin_siCTR_4.tif	47
																											367	1			358	5			367	VeCad_DAPI_40x8bit_2016_11_07_siYap_4.tif	97			367	Exp3_27217_DAPI_VeCad_Phalloidin_siCTR_4.tif	41
																											368	1			359	0			368	VeCad_DAPI_40x8bit_2016_11_07_siTaz_5.tif	30			368	Exp2_13317_DAPI_VeCad_Phalloidin_siYap_1.tif	27
																											369	4			360	3			369	VeCad_DAPI_40x8bit_2016_11_07_siYap_2.tif	37			369	Exp2_13317_DAPI_VeCad_Phalloidin_siCTR_1.tif	38
																											370	0			361	2			370	VeCad_DAPI_40x8bit_2016_11_07_siTaz_5.tif	70			370	Exp2_13317_DAPI_VeCad_Phalloidin_siTaz_5.tif	17
																											371	5			362	0			371	VeCad_DAPI_40x8bit_2016_11_07_siYapTaz_5.tif	44			371	Exp2_13317_DAPI_VeCad_Phalloidin_siYap_5.tif	47
																											372	4			363	1			372	VeCad_DAPI_40x8bit_2016_11_07_siTaz_1.tif	25			372	Exp3_27217_DAPI_VeCad_Phalloidin_siYapTaz_5.tif	65
																											373	6			364	4			373	VeCad_DAPI_40x8bit_2016_11_07_siTaz_3.tif	35			373	Exp3_27217_DAPI_VeCad_Phalloidin_siYapTaz_5.tif	12
																											374	3			365	1	5		374	VeCad_DAPI_40x8bit_2016_11_07_siYapTaz_3.tif	25			374	Exp2_13317_DAPI_VeCad_Phalloidin_siTaz_5.tif	63
																											375	4			366	1			375	VeCad_DAPI_40x8bit_2016_11_07_siYap_3.tif	48			375	Exp3_27217_DAPI_VeCad_Phalloidin_siYap_1.tif	34
																											376	4			367	0			376	VeCad_DAPI_40x8bit_2016_11_07_siCTR_1.tif	29			376	Exp2_13317_DAPI_VeCad_Phalloidin_siYap_4.tif	14
																											377	1			368	1			377	VeCad_DAPI_40x8bit_2016_11_07_siTaz_4.tif	32			377	Exp2_13317_DAPI_VeCad_Phalloidin_siTaz_1.tif	66
																											378	6			369	3			378	VeCad_DAPI_40x8bit_2016_11_07_siCTR_4.tif	71			378	Exp2_13317_DAPI_VeCad_Phalloidin_siYapTaz_1.tif	66
																											379	0			370	5			379	VeCad_DAPI_40x8bit_2016_11_07_siTaz_2.tif	76			379	Exp2_13317_DAPI_VeCad_Phalloidin_siYapTaz_3.tif	58
																											380	1			371	0			380	VeCad_DAPI_40x8bit_2016_11_07_siYapTaz_5.tif	33			380	Exp3_27217_DAPI_VeCad_Phalloidin_siYapTaz_1.tif	94
																											381	3			372	5			381	VeCad_DAPI_40x8bit_2016_11_07_siYap_1.tif	20			381	Exp3_27217_DAPI_VeCad_Phalloidin_siYapTaz_4.tif	11
																											382	4	5		373	2	3		382	VeCad_DAPI_40x8bit_2016_11_07_siTaz_4.tif	23			382	Exp2_13317_DAPI_VeCad_Phalloidin_siYap_3.tif	25
																											383	4			374	0			383	VeCad_DAPI_40x8bit_2016_11_07_siTaz_3.tif	23			383	Exp3_27217_DAPI_VeCad_Phalloidin_siYap_1.tif	59
																											384	1			375	0			384	VeCad_DAPI_40x8bit_2016_11_07_siCTR_2.tif	97			384	Exp3_27217_DAPI_VeCad_Phalloidin_siYap_4.tif	87
																											385	0			376	0			385	VeCad_DAPI_40x8bit_2016_11_07_siYap_2.tif	38			385	Exp2_13317_DAPI_VeCad_Phalloidin_siYapTaz_1.tif	70
																											386	0			377	3			386	VeCad_DAPI_40x8bit_2016_11_07_siYap_3.tif	50			386	Exp3_27217_DAPI_VeCad_Phalloidin_siYap_4.tif	47
																											387	1			378	0			387	VeCad_DAPI_40x8bit_2016_11_07_siTaz_2.tif	86			387	Exp3_27217_DAPI_VeCad_Phalloidin_siYap_3.tif	84
																											388	0			379	0			388	VeCad_DAPI_40x8bit_2016_11_07_siTaz_1.tif	67			388	Exp2_13317_DAPI_VeCad_Phalloidin_siCTR_2.tif	40
																											389	3			380	0			389	VeCad_DAPI_40x8bit_2016_11_07_siCTR_5.tif	18			389	Exp3_27217_DAPI_VeCad_Phalloidin_siYapTaz_2.tif	97
																											390	0			381	0			390	VeCad_DAPI_40x8bit_2016_11_07_siTaz_3.tif	79			390	Exp3_27217_DAPI_VeCad_Phalloidin_siYapTaz_4.tif	71
																											391	2			382	1			391	VeCad_DAPI_40x8bit_2016_11_07_siYap_5.tif	91			391	Exp2_13317_DAPI_VeCad_Phalloidin_siCTR_5.tif	18
																											392	0			383	0			392	VeCad_DAPI_40x8bit_2016_11_07_siTaz_2.tif	53			392	Exp2_13317_DAPI_VeCad_Phalloidin_siYap_1.tif	41
																											393	0			384	0			393	VeCad_DAPI_40x8bit_2016_11_07_siTaz_1.tif	26			393	Exp2_13317_DAPI_VeCad_Phalloidin_siCTR_3.tif	72
																											394	4			385	0			394	VeCad_DAPI_40x8bit_2016_11_07_siYap_3.tif	60			394	Exp2_13317_DAPI_VeCad_Phalloidin_siYap_2.tif	6
																											395	1			386	1			395	VeCad_DAPI_40x8bit_2016_11_07_siTaz_4.tif	6			395	Exp2_13317_DAPI_VeCad_Phalloidin_siCTR_3.tif	35
																											396	0			387	1			396	VeCad_DAPI_40x8bit_2016_11_07_siYap_2.tif	49			396	Exp2_13317_DAPI_VeCad_Phalloidin_siYap_3.tif	18
																											397	0			388	5			397	VeCad_DAPI_40x8bit_2016_11_07_siYap_5.tif	97			397	Exp2_13317_DAPI_VeCad_Phalloidin_siYap_3.tif	6
																											398	5			389	0			398	VeCad_DAPI_40x8bit_2016_11_07_siYapTaz_5.tif	81			398	Exp3_27217_DAPI_VeCad_Phalloidin_siCTR_5.tif	3
																											399	1			390	5			399	VeCad_DAPI_40x8bit_2016_11_07_siYapTaz_2.tif	34			399	Exp2_13317_DAPI_VeCad_Phalloidin_siYap_4.tif	80
																											400	5			391	0			400	VeCad_DAPI_40x8bit_2016_11_07_siTaz_5.tif	26			400	Exp3_27217_DAPI_VeCad_Phalloidin_siYapTaz_5.tif	75
																											401	2			392	1			401	VeCad_DAPI_40x8bit_2016_11_07_siYapTaz_4.tif	4			401	Exp2_13317_DAPI_VeCad_Phalloidin_siYap_3.tif	22
																											402	1			393	3			402	VeCad_DAPI_40x8bit_2016_11_07_siYap_5.tif	12			402	Exp3_27217_DAPI_VeCad_Phalloidin_siCTR_1.tif	34
																											403	0			394	1			403	VeCad_DAPI_40x8bit_2016_11_07_siYap_5.tif	10			403	Exp3_27217_DAPI_VeCad_Phalloidin_siYapTaz_5.tif	40
																											404	3			395	2			404	VeCad_DAPI_40x8bit_2016_11_07_siYap_2.tif	27			404	Exp2_13317_DAPI_VeCad_Phalloidin_siCTR_2.tif	5
																											405	4			396	1			405	VeCad_DAPI_40x8bit_2016_11_07_siYapTaz_1.tif	89			405	Exp2_13317_DAPI_VeCad_Phalloidin_siYap_5.tif	67
																											406	1			397	0			406	VeCad_DAPI_40x8bit_2016_11_07_siYap_3.tif	91			406	Exp2_13317_DAPI_VeCad_Phalloidin_siYapTaz_3.tif	24
																											407	1	5		398	4			407	VeCad_DAPI_40x8bit_2016_11_07_siYapTaz_1.tif	45			407	Exp2_13317_DAPI_VeCad_Phalloidin_siTaz_4.tif	51
																											408	5			399	1			408	VeCad_DAPI_40x8bit_2016_11_07_siCTR_1.tif	82			408	Exp2_13317_DAPI_VeCad_Phalloidin_siCTR_4.tif	43
																											409	1			400	0			409	VeCad_DAPI_40x8bit_2016_11_07_siYap_5.tif	78			409	Exp3_27217_DAPI_VeCad_Phalloidin_siCTR_4.tif	0
																											410	2			401	1			410	VeCad_DAPI_40x8bit_2016_11_07_siCTR_1.tif	27			410	Exp2_13317_DAPI_VeCad_Phalloidin_siYap_2.tif	72
																											411	2			402	2			411	VeCad_DAPI_40x8bit_2016_11_07_siTaz_5.tif	61			411	Exp2_13317_DAPI_VeCad_Phalloidin_siTaz_5.tif	52
																											412	2			403	1			412	VeCad_DAPI_40x8bit_2016_11_07_siCTR_4.tif	75			412	Exp2_13317_DAPI_VeCad_Phalloidin_siYapTaz_3.tif	17
																											413	4			404	3			413	VeCad_DAPI_40x8bit_2016_11_07_siTaz_4.tif	13			413	Exp3_27217_DAPI_VeCad_Phalloidin_siYapTaz_5.tif	78
																											414	1			405	5			414	VeCad_DAPI_40x8bit_2016_11_07_siCTR_1.tif	23			414	Exp2_13317_DAPI_VeCad_Phalloidin_siYap_5.tif	46
																											415	3			406	1			415	VeCad_DAPI_40x8bit_2016_11_07_siYapTaz_3.tif	96			415	Exp2_13317_DAPI_VeCad_Phalloidin_siTaz_3.tif	52
																											416	0			407	5			416	VeCad_DAPI_40x8bit_2016_11_07_siYap_4.tif	89			416	Exp3_27217_DAPI_VeCad_Phalloidin_siYapTaz_1.tif	71
																											417	1			408	0			417	VeCad_DAPI_40x8bit_2016_11_07_siYap_2.tif	19			417	Exp3_27217_DAPI_VeCad_Phalloidin_siCTR_2.tif	14
																											418	1			409	3			418	VeCad_DAPI_40x8bit_2016_11_07_siYapTaz_1.tif	38			418	Exp3_27217_DAPI_VeCad_Phalloidin_siYap_4.tif	65
																											419	0			410	5			419	VeCad_DAPI_40x8bit_2016_11_07_siTaz_5.tif	47			419	Exp3_27217_DAPI_VeCad_Phalloidin_siCTR_1.tif	82
																											420	1			411	2			420	VeCad_DAPI_40x8bit_2016_11_07_siYap_4.tif	63			420	Exp2_13317_DAPI_VeCad_Phalloidin_siCTR_2.tif	1
																											421	3			412	3			421	VeCad_DAPI_40x8bit_2016_11_07_siCTR_1.tif	71			421	Exp2_13317_DAPI_VeCad_Phalloidin_siYapTaz_5.tif	59
																											422	2			413	1			422	VeCad_DAPI_40x8bit_2016_11_07_siYap_4.tif	78			422	Exp2_13317_DAPI_VeCad_Phalloidin_siTaz_2.tif	20
																											423	1			414	0			423	VeCad_DAPI_40x8bit_2016_11_07_siYapTaz_5.tif	22			423	Exp3_27217_DAPI_VeCad_Phalloidin_siCTR_1.tif	70
																											424	3			415	1			424	VeCad_DAPI_40x8bit_2016_11_07_siYapTaz_4.tif	60			424	Exp3_27217_DAPI_VeCad_Phalloidin_siYap_4.tif	29
																											425	2			416	5			425	VeCad_DAPI_40x8bit_2016_11_07_siYapTaz_3.tif	70			425	Exp2_13317_DAPI_VeCad_Phalloidin_siTaz_4.tif	71
																											426	4			417	2			426	VeCad_DAPI_40x8bit_2016_11_07_siYapTaz_3.tif	39			426	Exp3_27217_DAPI_VeCad_Phalloidin_siYap_5.tif	56
																											427	1			418	1			427	VeCad_DAPI_40x8bit_2016_11_07_siYap_5.tif	41			427	Exp3_27217_DAPI_VeCad_Phalloidin_siYapTaz_5.tif	76
																											428	2			419	1			428	VeCad_DAPI_40x8bit_2016_11_07_siYap_5.tif	16			428	Exp2_13317_DAPI_VeCad_Phalloidin_siYap_3.tif	88
																											429	0			420	0			429	VeCad_DAPI_40x8bit_2016_11_07_siCTR_5.tif	23			429	Exp2_13317_DAPI_VeCad_Phalloidin_siCTR_3.tif	48
																											430	0			421	3			430	VeCad_DAPI_40x8bit_2016_11_07_siYap_3.tif	53			430	Exp3_27217_DAPI_VeCad_Phalloidin_siYapTaz_4.tif	44
																											431	3			422	3			431	VeCad_DAPI_40x8bit_2016_11_07_siCTR_5.tif	22			431	Exp2_13317_DAPI_VeCad_Phalloidin_siYap_1.tif	99
																											432	0			423	0			432	VeCad_DAPI_40x8bit_2016_11_07_siCTR_1.tif	61			432	Exp2_13317_DAPI_VeCad_Phalloidin_siCTR_2.tif	44
																											433	4			424	0			433	VeCad_DAPI_40x8bit_2016_11_07_siCTR_1.tif	25			433	Exp2_13317_DAPI_VeCad_Phalloidin_siTaz_4.tif	33
																											434	0			425	5			434	VeCad_DAPI_40x8bit_2016_11_07_siTaz_3.tif	34			434	Exp2_13317_DAPI_VeCad_Phalloidin_siYapTaz_1.tif	55
																											435	1			426	1			435	VeCad_DAPI_40x8bit_2016_11_07_siYap_3.tif	96			435	Exp2_13317_DAPI_VeCad_Phalloidin_siTaz_3.tif	3
																											436	0			427	0			436	VeCad_DAPI_40x8bit_2016_11_07_siYap_2.tif	96			436	Exp2_13317_DAPI_VeCad_Phalloidin_siYapTaz_1.tif	73
																											437	0			428	1			437	VeCad_DAPI_40x8bit_2016_11_07_siYap_2.tif	52			437	Exp2_13317_DAPI_VeCad_Phalloidin_siYap_4.tif	96
																											438	1			429	5			438	VeCad_DAPI_40x8bit_2016_11_07_siYap_5.tif	37			438	Exp2_13317_DAPI_VeCad_Phalloidin_siTaz_1.tif	27
																											439	4			430	0			439	VeCad_DAPI_40x8bit_2016_11_07_siCTR_1.tif	98			439	Exp3_27217_DAPI_VeCad_Phalloidin_siYap_1.tif	3
																											440	2			431	3			440	VeCad_DAPI_40x8bit_2016_11_07_siCTR_2.tif	93			440	Exp2_13317_DAPI_VeCad_Phalloidin_siYap_3.tif	70
																											441	1			432	3			441	VeCad_DAPI_40x8bit_2016_11_07_siYap_2.tif	73			441	Exp2_13317_DAPI_VeCad_Phalloidin_siYap_1.tif	20
																											442	5			433	0			442	VeCad_DAPI_40x8bit_2016_11_07_siYapTaz_4.tif	46			442	Exp3_27217_DAPI_VeCad_Phalloidin_siYap_2.tif	23
																											443	0			434	1			443	VeCad_DAPI_40x8bit_2016_11_07_siTaz_3.tif	48			443	Exp2_13317_DAPI_VeCad_Phalloidin_siTaz_5.tif	87
																											444	4			435	2			444	VeCad_DAPI_40x8bit_2016_11_07_siCTR_1.tif	63			444	Exp3_27217_DAPI_VeCad_Phalloidin_siYap_4.tif	64
																											445	2			436	0			445	VeCad_DAPI_40x8bit_2016_11_07_siYapTaz_4.tif	69			445	Exp3_27217_DAPI_VeCad_Phalloidin_siCTR_2.tif	89
																											446	3			437	1			446	VeCad_DAPI_40x8bit_2016_11_07_siCTR_5.tif	3			446	Exp3_27217_DAPI_VeCad_Phalloidin_siYap_1.tif	98
																											447	0			438	0			447	VeCad_DAPI_40x8bit_2016_11_07_siTaz_1.tif	97			447	Exp2_13317_DAPI_VeCad_Phalloidin_siYap_2.tif	35
																											448	1			439	1			448	VeCad_DAPI_40x8bit_2016_11_07_siYap_5.tif	7			448	Exp2_13317_DAPI_VeCad_Phalloidin_siTaz_1.tif	78
																											449	2			440	0			449	VeCad_DAPI_40x8bit_2016_11_07_siYapTaz_5.tif	87			449	Exp3_27217_DAPI_VeCad_Phalloidin_siYap_5.tif	11
																											450	4			441	1			450	VeCad_DAPI_40x8bit_2016_11_07_siCTR_3.tif	53			450	Exp2_13317_DAPI_VeCad_Phalloidin_siTaz_3.tif	41
																											451	0			442	2			451	VeCad_DAPI_40x8bit_2016_11_07_siYapTaz_4.tif	1			451	Exp2_13317_DAPI_VeCad_Phalloidin_siCTR_2.tif	38
																											452	4			443	5			452	VeCad_DAPI_40x8bit_2016_11_07_siCTR_5.tif	33			452	Exp2_13317_DAPI_VeCad_Phalloidin_siCTR_3.tif	68
																											453	2			444	1			453	VeCad_DAPI_40x8bit_2016_11_07_siCTR_1.tif	65			453	Exp3_27217_DAPI_VeCad_Phalloidin_siYapTaz_1.tif	85
																											454	1			445	0			454	VeCad_DAPI_40x8bit_2016_11_07_siYapTaz_2.tif	42			454	Exp2_13317_DAPI_VeCad_Phalloidin_siYapTaz_1.tif	51
																											455	1			446	1			455	VeCad_DAPI_40x8bit_2016_11_07_siTaz_4.tif	90			455	Exp2_13317_DAPI_VeCad_Phalloidin_siYapTaz_3.tif	33
																											456	0			447	0			456	VeCad_DAPI_40x8bit_2016_11_07_siTaz_1.tif	8			456	Exp2_13317_DAPI_VeCad_Phalloidin_siCTR_3.tif	55
																											457	0			448	0			457	VeCad_DAPI_40x8bit_2016_11_07_siYapTaz_2.tif	35			457	Exp3_27217_DAPI_VeCad_Phalloidin_siCTR_5.tif	38
																											458	0			449	1			458	VeCad_DAPI_40x8bit_2016_11_07_siCTR_5.tif	27			458	Exp2_13317_DAPI_VeCad_Phalloidin_siCTR_4.tif	1
																											459	0			450	3			459	VeCad_DAPI_40x8bit_2016_11_07_siTaz_2.tif	34			459	Exp3_27217_DAPI_VeCad_Phalloidin_siYap_2.tif	97
																											460	5			451	2			460	VeCad_DAPI_40x8bit_2016_11_07_siTaz_5.tif	41			460	Exp2_13317_DAPI_VeCad_Phalloidin_siYap_5.tif	94
																											461	0			452	3			461	VeCad_DAPI_40x8bit_2016_11_07_siYapTaz_1.tif	56			461	Exp3_27217_DAPI_VeCad_Phalloidin_siCTR_2.tif	85
																											462	1			453	1			462	VeCad_DAPI_40x8bit_2016_11_07_siYap_3.tif	94			462	Exp2_13317_DAPI_VeCad_Phalloidin_siYapTaz_2.tif	89
																											463	5			454	5			463	VeCad_DAPI_40x8bit_2016_11_07_siYapTaz_1.tif	63			463	Exp2_13317_DAPI_VeCad_Phalloidin_siYap_2.tif	98
																											464	0			455	5			464	VeCad_DAPI_40x8bit_2016_11_07_siCTR_1.tif	20			464	Exp3_27217_DAPI_VeCad_Phalloidin_siYap_1.tif	24
																											465	0			456	3			465	VeCad_DAPI_40x8bit_2016_11_07_siYapTaz_3.tif	78			465	Exp3_27217_DAPI_VeCad_Phalloidin_siYapTaz_3.tif	74
																											466	5			457	1			466	VeCad_DAPI_40x8bit_2016_11_07_siYapTaz_5.tif	73			466	Exp3_27217_DAPI_VeCad_Phalloidin_siCTR_5.tif	56
																											467	0			458	3			467	VeCad_DAPI_40x8bit_2016_11_07_siYapTaz_5.tif	43			467	Exp3_27217_DAPI_VeCad_Phalloidin_siCTR_3.tif	80
																											468	0			459	1			468	VeCad_DAPI_40x8bit_2016_11_07_siCTR_2.tif	90			468	Exp2_13317_DAPI_VeCad_Phalloidin_siCTR_3.tif	64
																											469	0			460	0			469	VeCad_DAPI_40x8bit_2016_11_07_siTaz_1.tif	75			469	Exp3_27217_DAPI_VeCad_Phalloidin_siYap_1.tif	38
																											470	0			461	1			470	VeCad_DAPI_40x8bit_2016_11_07_siYapTaz_2.tif	57			470	Exp3_27217_DAPI_VeCad_Phalloidin_siCTR_5.tif	28
																											471	6			462	0			471	VeCad_DAPI_40x8bit_2016_11_07_siYap_2.tif	70			471	Exp2_13317_DAPI_VeCad_Phalloidin_siYapTaz_3.tif	70
																											472	2			463	1			472	VeCad_DAPI_40x8bit_2016_11_07_siYap_5.tif	45			472	Exp3_27217_DAPI_VeCad_Phalloidin_siYap_1.tif	43
																											473	0			464	0			473	VeCad_DAPI_40x8bit_2016_11_07_siTaz_3.tif	73			473	Exp3_27217_DAPI_VeCad_Phalloidin_siCTR_3.tif	27
																											474	1			465	1			474	VeCad_DAPI_40x8bit_2016_11_07_siYap_1.tif	25			474	Exp3_27217_DAPI_VeCad_Phalloidin_siYapTaz_2.tif	87
																											475	1			466	0			475	VeCad_DAPI_40x8bit_2016_11_07_siYap_4.tif	21			475	Exp3_27217_DAPI_VeCad_Phalloidin_siYapTaz_1.tif	83
																											476	5			467	0			476	VeCad_DAPI_40x8bit_2016_11_07_siYapTaz_3.tif	49			476	Exp3_27217_DAPI_VeCad_Phalloidin_siYapTaz_1.tif	40
																											477	0			468	3			477	VeCad_DAPI_40x8bit_2016_11_07_siTaz_1.tif	37			477	Exp3_27217_DAPI_VeCad_Phalloidin_siYapTaz_2.tif	79
																											478	2			469	0			478	VeCad_DAPI_40x8bit_2016_11_07_siYapTaz_2.tif	38			478	Exp3_27217_DAPI_VeCad_Phalloidin_siYapTaz_1.tif	54
																											479	4			470	3			479	VeCad_DAPI_40x8bit_2016_11_07_siCTR_1.tif	2			479	Exp3_27217_DAPI_VeCad_Phalloidin_siCTR_3.tif	71
																											480	5			471	0			480	VeCad_DAPI_40x8bit_2016_11_07_siYapTaz_3.tif	50			480	Exp2_13317_DAPI_VeCad_Phalloidin_siYapTaz_1.tif	47
																											481	0			472	0			481	VeCad_DAPI_40x8bit_2016_11_07_siYapTaz_4.tif	90			481	Exp3_27217_DAPI_VeCad_Phalloidin_siYapTaz_5.tif	98
																											482	3			473	3			482	VeCad_DAPI_40x8bit_2016_11_07_siYap_4.tif	59			482	Exp2_13317_DAPI_VeCad_Phalloidin_siCTR_1.tif	21
																											483	4			474	5			483	VeCad_DAPI_40x8bit_2016_11_07_siCTR_1.tif	93			483	Exp3_27217_DAPI_VeCad_Phalloidin_siYap_4.tif	74
																											484	0			475	0			484	VeCad_DAPI_40x8bit_2016_11_07_siYap_2.tif	2			484	Exp2_13317_DAPI_VeCad_Phalloidin_siCTR_1.tif	15
																											485	3			476	0			485	VeCad_DAPI_40x8bit_2016_11_07_siYap_1.tif	44			485	Exp3_27217_DAPI_VeCad_Phalloidin_siCTR_2.tif	87
																											486	1			477	1			486	VeCad_DAPI_40x8bit_2016_11_07_siYapTaz_4.tif	12			486	Exp2_13317_DAPI_VeCad_Phalloidin_siYap_4.tif	64
																											487	2			478	0			487	VeCad_DAPI_40x8bit_2016_11_07_siCTR_1.tif	74			487	Exp3_27217_DAPI_VeCad_Phalloidin_siYap_1.tif	49
																											488	1			479	0			488	VeCad_DAPI_40x8bit_2016_11_07_siYap_2.tif	41			488	Exp2_13317_DAPI_VeCad_Phalloidin_siYap_2.tif	29
																											489	2			480	0			489	VeCad_DAPI_40x8bit_2016_11_07_siYap_2.tif	33			489	Exp2_13317_DAPI_VeCad_Phalloidin_siYapTaz_2.tif	96
																											490	0			481	5			490	VeCad_DAPI_40x8bit_2016_11_07_siTaz_4.tif	21			490	Exp2_13317_DAPI_VeCad_Phalloidin_siTaz_4.tif	76
																											491	1			482	4			491	VeCad_DAPI_40x8bit_2016_11_07_siYap_3.tif	12			491	Exp3_27217_DAPI_VeCad_Phalloidin_siYap_4.tif	56
																											492	0			483	1			492	VeCad_DAPI_40x8bit_2016_11_07_siYap_3.tif	52			492	Exp2_13317_DAPI_VeCad_Phalloidin_siYapTaz_2.tif	58
																											493	0			484	2			493	VeCad_DAPI_40x8bit_2016_11_07_siYap_3.tif	8			493	Exp2_13317_DAPI_VeCad_Phalloidin_siTaz_1.tif	43
																											494	1			485	1			494	VeCad_DAPI_40x8bit_2016_11_07_siYap_1.tif	91			494	Exp2_13317_DAPI_VeCad_Phalloidin_siTaz_3.tif	77
																											495	5			486	0			495	VeCad_DAPI_40x8bit_2016_11_07_siYap_5.tif	86			495	Exp2_13317_DAPI_VeCad_Phalloidin_siCTR_4.tif	6
																											496	2			487	0			496	VeCad_DAPI_40x8bit_2016_11_07_siYapTaz_3.tif	15			496	Exp3_27217_DAPI_VeCad_Phalloidin_siCTR_3.tif	84
																											497	0			488	1			497	VeCad_DAPI_40x8bit_2016_11_07_siTaz_1.tif	55			497	Exp2_13317_DAPI_VeCad_Phalloidin_siYap_1.tif	17
																											498	2	1		489	0			498	VeCad_DAPI_40x8bit_2016_11_07_siYap_3.tif	36			498	Exp2_13317_DAPI_VeCad_Phalloidin_siYapTaz_5.tif	75
																											499	1			490	1			499	VeCad_DAPI_40x8bit_2016_11_07_siCTR_5.tif	17			499	Exp2_13317_DAPI_VeCad_Phalloidin_siCTR_5.tif	23
																											500	2			491	0			500	VeCad_DAPI_40x8bit_2016_11_07_siTaz_4.tif	85			500	Exp3_27217_DAPI_VeCad_Phalloidin_siYap_2.tif	52
																											501	0			492	5			501	VeCad_DAPI_40x8bit_2016_11_07_siTaz_1.tif	51			501	Exp2_13317_DAPI_VeCad_Phalloidin_siYapTaz_2.tif	35
																											502	1			493	2			502	VeCad_DAPI_40x8bit_2016_11_07_siYap_3.tif	46			502	Exp3_27217_DAPI_VeCad_Phalloidin_siYapTaz_1.tif	3
																											503	2			494	1			503	VeCad_DAPI_40x8bit_2016_11_07_siTaz_5.tif	1			503	Exp3_27217_DAPI_VeCad_Phalloidin_siYapTaz_5.tif	85
																											504	4			495	1			504	VeCad_DAPI_40x8bit_2016_11_07_siCTR_1.tif	60			504	Exp2_13317_DAPI_VeCad_Phalloidin_siTaz_3.tif	26
																											505	4			496	4			505	VeCad_DAPI_40x8bit_2016_11_07_siCTR_2.tif	15			505	Exp2_13317_DAPI_VeCad_Phalloidin_siTaz_3.tif	53
																											506	3			497	1			506	VeCad_DAPI_40x8bit_2016_11_07_siTaz_4.tif	25			506	Exp2_13317_DAPI_VeCad_Phalloidin_siCTR_3.tif	26
																											507	0			498	2			507	VeCad_DAPI_40x8bit_2016_11_07_siYap_4.tif	74			507	Exp2_13317_DAPI_VeCad_Phalloidin_siYapTaz_3.tif	35
																											508	2			499	3			508	VeCad_DAPI_40x8bit_2016_11_07_siCTR_1.tif	10			508	Exp3_27217_DAPI_VeCad_Phalloidin_siYapTaz_5.tif	88
																											509	1			500	0			509	VeCad_DAPI_40x8bit_2016_11_07_siTaz_2.tif	79			509	Exp2_13317_DAPI_VeCad_Phalloidin_siYapTaz_5.tif	86
																											510	0			501	1			510	VeCad_DAPI_40x8bit_2016_11_07_siYap_5.tif	28			510	Exp2_13317_DAPI_VeCad_Phalloidin_siTaz_2.tif	2
																											511	4			502	5			511	VeCad_DAPI_40x8bit_2016_11_07_siCTR_2.tif	14			511	Exp2_13317_DAPI_VeCad_Phalloidin_siCTR_2.tif	54
																											512	0			503	0			512	VeCad_DAPI_40x8bit_2016_11_07_siTaz_5.tif	29			512	Exp3_27217_DAPI_VeCad_Phalloidin_siCTR_3.tif	13
																											513	4			504	5			513	VeCad_DAPI_40x8bit_2016_11_07_siYap_2.tif	85			513	Exp2_13317_DAPI_VeCad_Phalloidin_siCTR_5.tif	60
																											514	1			505	0			514	VeCad_DAPI_40x8bit_2016_11_07_siYap_2.tif	90			514	Exp2_13317_DAPI_VeCad_Phalloidin_siTaz_1.tif	73
																											515	1			506	5			515	VeCad_DAPI_40x8bit_2016_11_07_siYap_3.tif	71			515	Exp2_13317_DAPI_VeCad_Phalloidin_siTaz_2.tif	14
																											516	1			507	2			516	VeCad_DAPI_40x8bit_2016_11_07_siCTR_3.tif	91			516	Exp2_13317_DAPI_VeCad_Phalloidin_siYap_1.tif	48
																											517	1			508	1			517	VeCad_DAPI_40x8bit_2016_11_07_siYap_3.tif	33			517	Exp3_27217_DAPI_VeCad_Phalloidin_siCTR_2.tif	93
																											518	0			509	5			518	VeCad_DAPI_40x8bit_2016_11_07_siTaz_2.tif	62			518	Exp2_13317_DAPI_VeCad_Phalloidin_siYap_4.tif	34
																											519	2			510	3			519	VeCad_DAPI_40x8bit_2016_11_07_siYapTaz_3.tif	92			519	Exp3_27217_DAPI_VeCad_Phalloidin_siCTR_2.tif	11
																											520	1			511	0			520	VeCad_DAPI_40x8bit_2016_11_07_siYapTaz_1.tif	6			520	Exp3_27217_DAPI_VeCad_Phalloidin_siYapTaz_3.tif	21
																											521	2			512	0			521	VeCad_DAPI_40x8bit_2016_11_07_siYap_5.tif	94			521	Exp3_27217_DAPI_VeCad_Phalloidin_siYapTaz_4.tif	52
																											522	1			513	2			522	VeCad_DAPI_40x8bit_2016_11_07_siYap_3.tif	74			522	Exp3_27217_DAPI_VeCad_Phalloidin_siCTR_2.tif	91
																											523	2			514	0			523	VeCad_DAPI_40x8bit_2016_11_07_siYapTaz_5.tif	80			523	Exp2_13317_DAPI_VeCad_Phalloidin_siYapTaz_4.tif	5
																											524	0			515	2			524	VeCad_DAPI_40x8bit_2016_11_07_siCTR_5.tif	82			524	Exp2_13317_DAPI_VeCad_Phalloidin_siYapTaz_1.tif	14
																											525	2			516	1			525	VeCad_DAPI_40x8bit_2016_11_07_siYap_4.tif	79			525	Exp3_27217_DAPI_VeCad_Phalloidin_siYap_5.tif	55
																											526	3			517	4			526	VeCad_DAPI_40x8bit_2016_11_07_siTaz_5.tif	60			526	Exp3_27217_DAPI_VeCad_Phalloidin_siYapTaz_5.tif	66
																											527	3			518	1			527	VeCad_DAPI_40x8bit_2016_11_07_siYap_1.tif	12			527	Exp2_13317_DAPI_VeCad_Phalloidin_siCTR_2.tif	71
																											528	0			519	5			528	VeCad_DAPI_40x8bit_2016_11_07_siTaz_5.tif	42			528	Exp3_27217_DAPI_VeCad_Phalloidin_siYap_4.tif	98
																											529	4			520	0			529	VeCad_DAPI_40x8bit_2016_11_07_siCTR_2.tif	11			529	Exp3_27217_DAPI_VeCad_Phalloidin_siYap_1.tif	1
																											530	1			521	0			530	VeCad_DAPI_40x8bit_2016_11_07_siYap_4.tif	17			530	Exp2_13317_DAPI_VeCad_Phalloidin_siYap_3.tif	97
																											531	2			522	0			531	VeCad_DAPI_40x8bit_2016_11_07_siYap_4.tif	71			531	Exp3_27217_DAPI_VeCad_Phalloidin_siYap_4.tif	46
																											532	1			523	5			532	VeCad_DAPI_40x8bit_2016_11_07_siYap_4.tif	20			532	Exp3_27217_DAPI_VeCad_Phalloidin_siYapTaz_2.tif	93
																											533	0			524	3			533	VeCad_DAPI_40x8bit_2016_11_07_siYapTaz_2.tif	80			533	Exp2_13317_DAPI_VeCad_Phalloidin_siCTR_5.tif	77
																											534	1			525	1			534	VeCad_DAPI_40x8bit_2016_11_07_siYapTaz_2.tif	6			534	Exp2_13317_DAPI_VeCad_Phalloidin_siYapTaz_1.tif	89
																											535	2			526	4			535	VeCad_DAPI_40x8bit_2016_11_07_siYap_5.tif	55			535	Exp3_27217_DAPI_VeCad_Phalloidin_siCTR_1.tif	30
																											536	0			527	2			536	VeCad_DAPI_40x8bit_2016_11_07_siYap_3.tif	17			536	Exp3_27217_DAPI_VeCad_Phalloidin_siCTR_3.tif	78
																											537	5			528	0			537	VeCad_DAPI_40x8bit_2016_11_07_siTaz_4.tif	86			537	Exp2_13317_DAPI_VeCad_Phalloidin_siYapTaz_3.tif	63
																											538	3			529	0			538	VeCad_DAPI_40x8bit_2016_11_07_siYap_4.tif	5			538	Exp3_27217_DAPI_VeCad_Phalloidin_siYap_3.tif	71
																											539	0			530	1			539	VeCad_DAPI_40x8bit_2016_11_07_siCTR_1.tif	24			539	Exp2_13317_DAPI_VeCad_Phalloidin_siYapTaz_2.tif	0
																											540	4			531	2			540	VeCad_DAPI_40x8bit_2016_11_07_siCTR_1.tif	55			540	Exp3_27217_DAPI_VeCad_Phalloidin_siYap_1.tif	26
																											541	5			532	1			541	VeCad_DAPI_40x8bit_2016_11_07_siTaz_2.tif	33			541	Exp3_27217_DAPI_VeCad_Phalloidin_siCTR_1.tif	53
																											542	0			533	4			542	VeCad_DAPI_40x8bit_2016_11_07_siTaz_1.tif	23			542	Exp2_13317_DAPI_VeCad_Phalloidin_siCTR_3.tif	78
																											543	1			534	5			543	VeCad_DAPI_40x8bit_2016_11_07_siYap_2.tif	55			543	Exp2_13317_DAPI_VeCad_Phalloidin_siYap_1.tif	86
																											544	0			535	0			544	VeCad_DAPI_40x8bit_2016_11_07_siCTR_3.tif	12			544	Exp2_13317_DAPI_VeCad_Phalloidin_siTaz_1.tif	93
																											545	0			536	4			545	VeCad_DAPI_40x8bit_2016_11_07_siTaz_1.tif	7			545	Exp3_27217_DAPI_VeCad_Phalloidin_siYap_1.tif	97
																											546	3			537	0			546	VeCad_DAPI_40x8bit_2016_11_07_siTaz_3.tif	26			546	Exp2_13317_DAPI_VeCad_Phalloidin_siYap_4.tif	6
																											547	2			538	1			547	VeCad_DAPI_40x8bit_2016_11_07_siYapTaz_3.tif	17			547	Exp3_27217_DAPI_VeCad_Phalloidin_siCTR_4.tif	6
																											548	4			539	5			548	VeCad_DAPI_40x8bit_2016_11_07_siCTR_5.tif	76			548	Exp2_13317_DAPI_VeCad_Phalloidin_siTaz_2.tif	71
																											549	2			540	0			549	VeCad_DAPI_40x8bit_2016_11_07_siCTR_1.tif	62			549	Exp2_13317_DAPI_VeCad_Phalloidin_siYapTaz_5.tif	81
																											550	0			541	4			550	VeCad_DAPI_40x8bit_2016_11_07_siTaz_1.tif	71			550	Exp2_13317_DAPI_VeCad_Phalloidin_siCTR_4.tif	68
																											551	4			542	2			551	VeCad_DAPI_40x8bit_2016_11_07_siCTR_2.tif	71			551	Exp2_13317_DAPI_VeCad_Phalloidin_siYap_3.tif	65
																											552	1			543	1			552	VeCad_DAPI_40x8bit_2016_11_07_siYap_2.tif	18			552	Exp2_13317_DAPI_VeCad_Phalloidin_siCTR_3.tif	74
																											553	2			544	0			553	VeCad_DAPI_40x8bit_2016_11_07_siYapTaz_4.tif	84			553	Exp3_27217_DAPI_VeCad_Phalloidin_siYap_2.tif	79
																											554	0			545	0			554	VeCad_DAPI_40x8bit_2016_11_07_siCTR_4.tif	7			554	Exp2_13317_DAPI_VeCad_Phalloidin_siYap_1.tif	59
																											555	4			546	0			555	VeCad_DAPI_40x8bit_2016_11_07_siYap_3.tif	4			555	Exp2_13317_DAPI_VeCad_Phalloidin_siYapTaz_1.tif	0
																											556	4	5		547	4			556	VeCad_DAPI_40x8bit_2016_11_07_siTaz_4.tif	4			556	Exp3_27217_DAPI_VeCad_Phalloidin_siYapTaz_1.tif	80
																											557	4			548	0			557	VeCad_DAPI_40x8bit_2016_11_07_siCTR_4.tif	68			557	Exp2_13317_DAPI_VeCad_Phalloidin_siTaz_5.tif	36
																											558	0			549	5			558	VeCad_DAPI_40x8bit_2016_11_07_siCTR_3.tif	57			558	Exp3_27217_DAPI_VeCad_Phalloidin_siCTR_1.tif	15
																											559	2			550	1			559	VeCad_DAPI_40x8bit_2016_11_07_siCTR_5.tif	60			559	Exp2_13317_DAPI_VeCad_Phalloidin_siYapTaz_1.tif	9
																											560	0			551	0			560	VeCad_DAPI_40x8bit_2016_11_07_siTaz_2.tif	94			560	Exp2_13317_DAPI_VeCad_Phalloidin_siYap_3.tif	11
																											561	5			552	4			561	VeCad_DAPI_40x8bit_2016_11_07_siTaz_4.tif	91			561	Exp3_27217_DAPI_VeCad_Phalloidin_siYap_3.tif	93
																											562	4			553	0			562	VeCad_DAPI_40x8bit_2016_11_07_siCTR_1.tif	67			562	Exp2_13317_DAPI_VeCad_Phalloidin_siYap_3.tif	15
																											563	4			554	1			563	VeCad_DAPI_40x8bit_2016_11_07_siCTR_1.tif	97			563	Exp2_13317_DAPI_VeCad_Phalloidin_siCTR_1.tif	18
																											564	0			555	0			564	VeCad_DAPI_40x8bit_2016_11_07_siYapTaz_2.tif	32			564	Exp2_13317_DAPI_VeCad_Phalloidin_siTaz_1.tif	55
																											565	3			556	5			565	VeCad_DAPI_40x8bit_2016_11_07_siCTR_4.tif	60			565	Exp2_13317_DAPI_VeCad_Phalloidin_siYap_1.tif	28
																											566	0			557	3			566	VeCad_DAPI_40x8bit_2016_11_07_siTaz_1.tif	86			566	Exp3_27217_DAPI_VeCad_Phalloidin_siYap_4.tif	48
																											567	5			558	3			567	VeCad_DAPI_40x8bit_2016_11_07_siTaz_3.tif	7			567	Exp3_27217_DAPI_VeCad_Phalloidin_siYapTaz_1.tif	48
																											568	6			559	2			568	VeCad_DAPI_40x8bit_2016_11_07_siCTR_1.tif	31			568	Exp2_13317_DAPI_VeCad_Phalloidin_siYap_3.tif	35
																											569	4			560	1			569	VeCad_DAPI_40x8bit_2016_11_07_siCTR_4.tif	44			569	Exp2_13317_DAPI_VeCad_Phalloidin_siYapTaz_2.tif	52
																											570	5			561	1			570	VeCad_DAPI_40x8bit_2016_11_07_siYapTaz_2.tif	66			570	Exp3_27217_DAPI_VeCad_Phalloidin_siCTR_2.tif	36
																											571	0			562	1			571	VeCad_DAPI_40x8bit_2016_11_07_siTaz_2.tif	48			571	Exp2_13317_DAPI_VeCad_Phalloidin_siTaz_2.tif	57
																											572	4			563	3			572	VeCad_DAPI_40x8bit_2016_11_07_siCTR_5.tif	50			572	Exp3_27217_DAPI_VeCad_Phalloidin_siYapTaz_1.tif	18
																											573	2			564	3			573	VeCad_DAPI_40x8bit_2016_11_07_siCTR_3.tif	32			573	Exp2_13317_DAPI_VeCad_Phalloidin_siYap_4.tif	78
																											574	1			565	1			574	VeCad_DAPI_40x8bit_2016_11_07_siTaz_2.tif	69			574	Exp3_27217_DAPI_VeCad_Phalloidin_siYap_4.tif	9
																											575	1	4		566	0			575	VeCad_DAPI_40x8bit_2016_11_07_siYapTaz_4.tif	41			575	Exp3_27217_DAPI_VeCad_Phalloidin_siCTR_1.tif	87
																											576	2			567	0			576	VeCad_DAPI_40x8bit_2016_11_07_siYap_2.tif	5			576	Exp3_27217_DAPI_VeCad_Phalloidin_siYap_2.tif	77
																											577	4			568	5			577	VeCad_DAPI_40x8bit_2016_11_07_siCTR_5.tif	84			577	Exp2_13317_DAPI_VeCad_Phalloidin_siYapTaz_1.tif	21
																											578	4			569	1			578	VeCad_DAPI_40x8bit_2016_11_07_siCTR_4.tif	33			578	Exp3_27217_DAPI_VeCad_Phalloidin_siYapTaz_4.tif	80
																											579	5			570	2			579	VeCad_DAPI_40x8bit_2016_11_07_siYapTaz_5.tif	49			579	Exp3_27217_DAPI_VeCad_Phalloidin_siCTR_5.tif	45
																											580	4			571	0			580	VeCad_DAPI_40x8bit_2016_11_07_siCTR_5.tif	30			580	Exp2_13317_DAPI_VeCad_Phalloidin_siTaz_3.tif	84
																											581	4			572	0			581	VeCad_DAPI_40x8bit_2016_11_07_siCTR_2.tif	36			581	Exp3_27217_DAPI_VeCad_Phalloidin_siYapTaz_5.tif	36
																											582	0			573	2			582	VeCad_DAPI_40x8bit_2016_11_07_siYapTaz_3.tif	76			582	Exp3_27217_DAPI_VeCad_Phalloidin_siYap_5.tif	61
																											583	0			574	1			583	VeCad_DAPI_40x8bit_2016_11_07_siYapTaz_2.tif	18			583	Exp3_27217_DAPI_VeCad_Phalloidin_siYap_4.tif	90
																											584	2			575	5			584	VeCad_DAPI_40x8bit_2016_11_07_siYapTaz_4.tif	74			584	Exp2_13317_DAPI_VeCad_Phalloidin_siTaz_5.tif	74
																											585	2			576	2			585	VeCad_DAPI_40x8bit_2016_11_07_siCTR_3.tif	7			585	Exp2_13317_DAPI_VeCad_Phalloidin_siYapTaz_3.tif	3
																											586	2			577	5			586	VeCad_DAPI_40x8bit_2016_11_07_siCTR_3.tif	58			586	Exp2_13317_DAPI_VeCad_Phalloidin_siYap_3.tif	82
																											587	1			578	5			587	VeCad_DAPI_40x8bit_2016_11_07_siTaz_5.tif	18			587	Exp2_13317_DAPI_VeCad_Phalloidin_siCTR_4.tif	53
																											588	4			579	0			588	VeCad_DAPI_40x8bit_2016_11_07_siCTR_2.tif	20			588	Exp2_13317_DAPI_VeCad_Phalloidin_siYapTaz_4.tif	76
																											589	4			580	2			589	VeCad_DAPI_40x8bit_2016_11_07_siTaz_3.tif	20			589	Exp2_13317_DAPI_VeCad_Phalloidin_siCTR_5.tif	87
																											590	0			581	3			590	VeCad_DAPI_40x8bit_2016_11_07_siTaz_2.tif	80			590	Exp2_13317_DAPI_VeCad_Phalloidin_siYap_4.tif	77
																											591	4			582	1			591	VeCad_DAPI_40x8bit_2016_11_07_siYapTaz_2.tif	25			591	Exp3_27217_DAPI_VeCad_Phalloidin_siCTR_1.tif	46
																											592	2			583	0			592	VeCad_DAPI_40x8bit_2016_11_07_siYapTaz_4.tif	32			592	Exp2_13317_DAPI_VeCad_Phalloidin_siYap_5.tif	66
																											593	1			584	0			593	VeCad_DAPI_40x8bit_2016_11_07_siYapTaz_2.tif	23			593	Exp3_27217_DAPI_VeCad_Phalloidin_siYap_2.tif	16
																											594	1			585	0			594	VeCad_DAPI_40x8bit_2016_11_07_siYapTaz_5.tif	93			594	Exp2_13317_DAPI_VeCad_Phalloidin_siYap_2.tif	68
																											595	2			586	0			595	VeCad_DAPI_40x8bit_2016_11_07_siYap_5.tif	18			595	Exp2_13317_DAPI_VeCad_Phalloidin_siYap_2.tif	62
																											596	0			587	2			596	VeCad_DAPI_40x8bit_2016_11_07_siYap_1.tif	61			596	Exp2_13317_DAPI_VeCad_Phalloidin_siYap_5.tif	79
																											597	4			588	3			597	VeCad_DAPI_40x8bit_2016_11_07_siYapTaz_1.tif	30			597	Exp3_27217_DAPI_VeCad_Phalloidin_siYapTaz_3.tif	96
																											598	2			589	4			598	VeCad_DAPI_40x8bit_2016_11_07_siYap_1.tif	40			598	Exp3_27217_DAPI_VeCad_Phalloidin_siYapTaz_1.tif	91
																											599	4			590	2			599	VeCad_DAPI_40x8bit_2016_11_07_siTaz_2.tif	3			599	Exp3_27217_DAPI_VeCad_Phalloidin_siCTR_2.tif	59
																											600	6			591	3			600	VeCad_DAPI_40x8bit_2016_11_07_siYap_1.tif	7			600	Exp2_13317_DAPI_VeCad_Phalloidin_siYapTaz_5.tif	55
																											601	2			592	1			601	VeCad_DAPI_40x8bit_2016_11_07_siYapTaz_5.tif	79			601	Exp2_13317_DAPI_VeCad_Phalloidin_siYap_5.tif	50
																											602	0			593	0			602	VeCad_DAPI_40x8bit_2016_11_07_siYapTaz_2.tif	79			602	Exp3_27217_DAPI_VeCad_Phalloidin_siYapTaz_1.tif	4
																											603	1			594	2			603	VeCad_DAPI_40x8bit_2016_11_07_siCTR_4.tif	91			603	Exp3_27217_DAPI_VeCad_Phalloidin_siCTR_2.tif	77
																											604	2			595	0			604	VeCad_DAPI_40x8bit_2016_11_07_siYap_2.tif	99			604	Exp3_27217_DAPI_VeCad_Phalloidin_siYap_4.tif	33
																											605	0			596	1			605	VeCad_DAPI_40x8bit_2016_11_07_siTaz_1.tif	66			605	Exp2_13317_DAPI_VeCad_Phalloidin_siTaz_2.tif	64
																											606	0			597	1			606	VeCad_DAPI_40x8bit_2016_11_07_siTaz_2.tif	10			606	Exp2_13317_DAPI_VeCad_Phalloidin_siYapTaz_2.tif	36
																											607	5			598	3			607	VeCad_DAPI_40x8bit_2016_11_07_siYapTaz_5.tif	34			607	Exp3_27217_DAPI_VeCad_Phalloidin_siCTR_1.tif	39
																											608	1			599	3			608	VeCad_DAPI_40x8bit_2016_11_07_siTaz_5.tif	75			608	Exp2_13317_DAPI_VeCad_Phalloidin_siCTR_2.tif	65
																											609	1			600	0			609	VeCad_DAPI_40x8bit_2016_11_07_siYap_1.tif	47			609	Exp3_27217_DAPI_VeCad_Phalloidin_siYap_1.tif	28
																											610	0			601	0			610	VeCad_DAPI_40x8bit_2016_11_07_siYap_2.tif	31			610	Exp2_13317_DAPI_VeCad_Phalloidin_siCTR_2.tif	62
																											611	1			602	2			611	VeCad_DAPI_40x8bit_2016_11_07_siYap_5.tif	77			611	Exp2_13317_DAPI_VeCad_Phalloidin_siTaz_1.tif	61
																											612	5			603	5			612	VeCad_DAPI_40x8bit_2016_11_07_siTaz_2.tif	5			612	Exp2_13317_DAPI_VeCad_Phalloidin_siYapTaz_2.tif	12
																											613	1			604	0			613	VeCad_DAPI_40x8bit_2016_11_07_siYap_2.tif	0			613	Exp3_27217_DAPI_VeCad_Phalloidin_siYapTaz_3.tif	2
																											614	2			605	0			614	VeCad_DAPI_40x8bit_2016_11_07_siCTR_3.tif	41			614	Exp3_27217_DAPI_VeCad_Phalloidin_siYapTaz_1.tif	63
																											615	0			606	5			615	VeCad_DAPI_40x8bit_2016_11_07_siTaz_4.tif	42			615	Exp2_13317_DAPI_VeCad_Phalloidin_siCTR_4.tif	13
																											616	0			607	1			616	VeCad_DAPI_40x8bit_2016_11_07_siYap_3.tif	73			616	Exp2_13317_DAPI_VeCad_Phalloidin_siYap_4.tif	45
																											617	0			608	2			617	VeCad_DAPI_40x8bit_2016_11_07_siTaz_2.tif	82			617	Exp3_27217_DAPI_VeCad_Phalloidin_siYapTaz_5.tif	71
																											618	2			609	1			618	VeCad_DAPI_40x8bit_2016_11_07_siCTR_4.tif	85			618	Exp2_13317_DAPI_VeCad_Phalloidin_siYap_4.tif	27
																											619	6			610	0			619	VeCad_DAPI_40x8bit_2016_11_07_siYap_3.tif	75			619	Exp2_13317_DAPI_VeCad_Phalloidin_siYapTaz_2.tif	91
																											620	5			611	3			620	VeCad_DAPI_40x8bit_2016_11_07_siYapTaz_4.tif	49			620	Exp2_13317_DAPI_VeCad_Phalloidin_siTaz_1.tif	10
																											621	0			612	5			621	VeCad_DAPI_40x8bit_2016_11_07_siTaz_5.tif	27			621	Exp2_13317_DAPI_VeCad_Phalloidin_siCTR_3.tif	93
																											622	1			613	1			622	VeCad_DAPI_40x8bit_2016_11_07_siYapTaz_2.tif	89			622	Exp2_13317_DAPI_VeCad_Phalloidin_siTaz_4.tif	2
																											623	0			614	0			623	VeCad_DAPI_40x8bit_2016_11_07_siTaz_4.tif	68			623	Exp3_27217_DAPI_VeCad_Phalloidin_siYap_2.tif	20
																											624	2			615	0			624	VeCad_DAPI_40x8bit_2016_11_07_siYap_3.tif	58			624	Exp2_13317_DAPI_VeCad_Phalloidin_siCTR_4.tif	82
																											625	4			616	1			625	VeCad_DAPI_40x8bit_2016_11_07_siTaz_5.tif	86			625	Exp3_27217_DAPI_VeCad_Phalloidin_siCTR_3.tif	49
																											626	6			617	1			626	VeCad_DAPI_40x8bit_2016_11_07_siTaz_3.tif	74			626	Exp3_27217_DAPI_VeCad_Phalloidin_siYapTaz_4.tif	31
																											627	2			618	0			627	VeCad_DAPI_40x8bit_2016_11_07_siYapTaz_5.tif	84			627	Exp2_13317_DAPI_VeCad_Phalloidin_siYap_3.tif	41
																											628	0			619	5			628	VeCad_DAPI_40x8bit_2016_11_07_siYapTaz_3.tif	80			628	Exp2_13317_DAPI_VeCad_Phalloidin_siCTR_4.tif	50
																											629	2	5		620	0			629	VeCad_DAPI_40x8bit_2016_11_07_siTaz_3.tif	37			629	Exp2_13317_DAPI_VeCad_Phalloidin_siTaz_2.tif	43
																											630	0			621	0			630	VeCad_DAPI_40x8bit_2016_11_07_siYapTaz_1.tif	39			630	Exp2_13317_DAPI_VeCad_Phalloidin_siTaz_2.tif	24
																											631	4			622	5			631	VeCad_DAPI_40x8bit_2016_11_07_siCTR_5.tif	14			631	Exp2_13317_DAPI_VeCad_Phalloidin_siYapTaz_1.tif	46
																											632	4			623	0			632	VeCad_DAPI_40x8bit_2016_11_07_siCTR_5.tif	51			632	Exp2_13317_DAPI_VeCad_Phalloidin_siCTR_1.tif	23
																											633	0			624	3			633	VeCad_DAPI_40x8bit_2016_11_07_siCTR_4.tif	27			633	Exp3_27217_DAPI_VeCad_Phalloidin_siYapTaz_1.tif	26
																											634	2	1		625	1			634	VeCad_DAPI_40x8bit_2016_11_07_siYap_3.tif	97			634	Exp2_13317_DAPI_VeCad_Phalloidin_siTaz_2.tif	85
																											635	0			626	1			635	VeCad_DAPI_40x8bit_2016_11_07_siYapTaz_2.tif	37			635	Exp3_27217_DAPI_VeCad_Phalloidin_siYap_5.tif	58
																											636	1			627	2			636	VeCad_DAPI_40x8bit_2016_11_07_siYap_5.tif	13			636	Exp3_27217_DAPI_VeCad_Phalloidin_siYapTaz_2.tif	69
																											637	0			628	1			637	VeCad_DAPI_40x8bit_2016_11_07_siYapTaz_5.tif	15			637	Exp3_27217_DAPI_VeCad_Phalloidin_siCTR_4.tif	50
																											638	2			629	2			638	VeCad_DAPI_40x8bit_2016_11_07_siYapTaz_4.tif	52			638	Exp2_13317_DAPI_VeCad_Phalloidin_siCTR_1.tif	84
																											639	1			630	0			639	VeCad_DAPI_40x8bit_2016_11_07_siYapTaz_2.tif	43			639	Exp3_27217_DAPI_VeCad_Phalloidin_siYapTaz_4.tif	42
																											640	4			631	5			640	VeCad_DAPI_40x8bit_2016_11_07_siYapTaz_3.tif	62			640	Exp3_27217_DAPI_VeCad_Phalloidin_siCTR_3.tif	56
																											641	3			632	0			641	VeCad_DAPI_40x8bit_2016_11_07_siCTR_1.tif	32			641	Exp3_27217_DAPI_VeCad_Phalloidin_siCTR_3.tif	11
																											642	1			633	1			642	VeCad_DAPI_40x8bit_2016_11_07_siYap_2.tif	82			642	Exp2_13317_DAPI_VeCad_Phalloidin_siYapTaz_2.tif	70
																											643	0			634	5			643	VeCad_DAPI_40x8bit_2016_11_07_siCTR_3.tif	95			643	Exp2_13317_DAPI_VeCad_Phalloidin_siTaz_4.tif	8
																											644	0			635	1			644	VeCad_DAPI_40x8bit_2016_11_07_siCTR_3.tif	60			644	Exp2_13317_DAPI_VeCad_Phalloidin_siYap_3.tif	9
																											645	1			636	0			645	VeCad_DAPI_40x8bit_2016_11_07_siYap_3.tif	84			645	Exp3_27217_DAPI_VeCad_Phalloidin_siYap_2.tif	42
																											646	2			637	4			646	VeCad_DAPI_40x8bit_2016_11_07_siYap_3.tif	38			646	Exp2_13317_DAPI_VeCad_Phalloidin_siYapTaz_4.tif	0
																											647	2			638	0			647	VeCad_DAPI_40x8bit_2016_11_07_siCTR_3.tif	73			647	Exp3_27217_DAPI_VeCad_Phalloidin_siYap_2.tif	17
																											648	1			639	1			648	VeCad_DAPI_40x8bit_2016_11_07_siYap_3.tif	27			648	Exp3_27217_DAPI_VeCad_Phalloidin_siYapTaz_1.tif	76
																											649	4			640	4			649	VeCad_DAPI_40x8bit_2016_11_07_siCTR_4.tif	88			649	Exp2_13317_DAPI_VeCad_Phalloidin_siYapTaz_5.tif	99
																											650	0			641	2			650	VeCad_DAPI_40x8bit_2016_11_07_siYap_3.tif	86			650	Exp2_13317_DAPI_VeCad_Phalloidin_siTaz_5.tif	78
																											651	0			642	5			651	VeCad_DAPI_40x8bit_2016_11_07_siYapTaz_2.tif	44			651	Exp3_27217_DAPI_VeCad_Phalloidin_siYap_2.tif	35
																											652	5			643	2			652	VeCad_DAPI_40x8bit_2016_11_07_siYapTaz_4.tif	28			652	Exp3_27217_DAPI_VeCad_Phalloidin_siYapTaz_4.tif	63
																											653	3			644	1			653	VeCad_DAPI_40x8bit_2016_11_07_siTaz_4.tif	66			653	Exp2_13317_DAPI_VeCad_Phalloidin_siYap_1.tif	82
																											654	5			645	0			654	VeCad_DAPI_40x8bit_2016_11_07_siTaz_4.tif	36			654	Exp2_13317_DAPI_VeCad_Phalloidin_siYap_3.tif	3
																											655	4			646	0			655	VeCad_DAPI_40x8bit_2016_11_07_siTaz_4.tif	61			655	Exp3_27217_DAPI_VeCad_Phalloidin_siYapTaz_3.tif	25
																											656	0			647	1			656	VeCad_DAPI_40x8bit_2016_11_07_siYap_4.tif	30			656	Exp2_13317_DAPI_VeCad_Phalloidin_siCTR_1.tif	60
																											657	4			648	3			657	VeCad_DAPI_40x8bit_2016_11_07_siCTR_3.tif	97			657	Exp2_13317_DAPI_VeCad_Phalloidin_siTaz_4.tif	47
																											658	4	5		649	1			658	VeCad_DAPI_40x8bit_2016_11_07_siYapTaz_1.tif	0			658	Exp3_27217_DAPI_VeCad_Phalloidin_siYapTaz_3.tif	40
																											659	4			650	3			659	VeCad_DAPI_40x8bit_2016_11_07_siCTR_4.tif	24			659	Exp2_13317_DAPI_VeCad_Phalloidin_siCTR_2.tif	82
																											660	3			651	1			660	VeCad_DAPI_40x8bit_2016_11_07_siCTR_1.tif	30			660	Exp2_13317_DAPI_VeCad_Phalloidin_siCTR_4.tif	97
																											661	0			652	0			661	VeCad_DAPI_40x8bit_2016_11_07_siTaz_1.tif	24			661	Exp2_13317_DAPI_VeCad_Phalloidin_siYapTaz_2.tif	23
																											662	0			653	2			662	VeCad_DAPI_40x8bit_2016_11_07_siTaz_1.tif	19			662	Exp3_27217_DAPI_VeCad_Phalloidin_siYapTaz_2.tif	48
																											663	4			654	2			663	VeCad_DAPI_40x8bit_2016_11_07_siCTR_4.tif	49			663	Exp3_27217_DAPI_VeCad_Phalloidin_siYap_2.tif	56
																											664	0			655	1			664	VeCad_DAPI_40x8bit_2016_11_07_siTaz_2.tif	73			664	Exp3_27217_DAPI_VeCad_Phalloidin_siYap_4.tif	84
																											665	0			656	4			665	VeCad_DAPI_40x8bit_2016_11_07_siYapTaz_3.tif	73			665	Exp2_13317_DAPI_VeCad_Phalloidin_siTaz_3.tif	22
																											666	0			657	1			666	VeCad_DAPI_40x8bit_2016_11_07_siYap_1.tif	8			666	Exp2_13317_DAPI_VeCad_Phalloidin_siCTR_3.tif	96
																											667	2			658	3			667	VeCad_DAPI_40x8bit_2016_11_07_siTaz_5.tif	15			667	Exp2_13317_DAPI_VeCad_Phalloidin_siYap_2.tif	10
																											668	4			659	1			668	VeCad_DAPI_40x8bit_2016_11_07_siCTR_1.tif	22			668	Exp2_13317_DAPI_VeCad_Phalloidin_siYapTaz_2.tif	99
																											669	6			660	3			669	VeCad_DAPI_40x8bit_2016_11_07_siTaz_3.tif	65			669	Exp3_27217_DAPI_VeCad_Phalloidin_siCTR_2.tif	50
																											670	0			661	0			670	VeCad_DAPI_40x8bit_2016_11_07_siTaz_2.tif	23			670	Exp2_13317_DAPI_VeCad_Phalloidin_siCTR_2.tif	77
																											671	5			662	0			671	VeCad_DAPI_40x8bit_2016_11_07_siTaz_4.tif	50			671	Exp3_27217_DAPI_VeCad_Phalloidin_siYap_5.tif	20
																											672	2	5		663	1			672	VeCad_DAPI_40x8bit_2016_11_07_siYapTaz_5.tif	28			672	Exp3_27217_DAPI_VeCad_Phalloidin_siCTR_1.tif	75
																											673	5			664	1			673	VeCad_DAPI_40x8bit_2016_11_07_siYapTaz_2.tif	84			673	Exp2_13317_DAPI_VeCad_Phalloidin_siCTR_2.tif	61
																											674	0			665	2			674	VeCad_DAPI_40x8bit_2016_11_07_siTaz_4.tif	96			674	Exp3_27217_DAPI_VeCad_Phalloidin_siYap_1.tif	91
																											675	4			666	4			675	VeCad_DAPI_40x8bit_2016_11_07_siCTR_1.tif	8			675	Exp2_13317_DAPI_VeCad_Phalloidin_siYapTaz_2.tif	98
																											676	2			667	1			676	VeCad_DAPI_40x8bit_2016_11_07_siCTR_5.tif	48			676	Exp3_27217_DAPI_VeCad_Phalloidin_siYap_1.tif	50
																											677	1	2		668	2			677	VeCad_DAPI_40x8bit_2016_11_07_siYap_5.tif	22			677	Exp2_13317_DAPI_VeCad_Phalloidin_siYapTaz_5.tif	60
																											678	0			669	5			678	VeCad_DAPI_40x8bit_2016_11_07_siTaz_1.tif	94			678	Exp2_13317_DAPI_VeCad_Phalloidin_siYapTaz_4.tif	50
																											679	2			670	0			679	VeCad_DAPI_40x8bit_2016_11_07_siYap_1.tif	45			679	Exp2_13317_DAPI_VeCad_Phalloidin_siYapTaz_1.tif	81
																											680	3			671	2			680	VeCad_DAPI_40x8bit_2016_11_07_siYapTaz_4.tif	65			680	Exp2_13317_DAPI_VeCad_Phalloidin_siTaz_2.tif	32
																											681	4			672	3			681	VeCad_DAPI_40x8bit_2016_11_07_siCTR_5.tif	90			681	Exp2_13317_DAPI_VeCad_Phalloidin_siYapTaz_5.tif	79
																											682	0			673	5			682	VeCad_DAPI_40x8bit_2016_11_07_siTaz_3.tif	87			682	Exp3_27217_DAPI_VeCad_Phalloidin_siCTR_4.tif	43
																											683	5			674	1			683	VeCad_DAPI_40x8bit_2016_11_07_siTaz_3.tif	19			683	Exp2_13317_DAPI_VeCad_Phalloidin_siCTR_3.tif	62
																											684	4			675	0			684	VeCad_DAPI_40x8bit_2016_11_07_siCTR_3.tif	35			684	Exp3_27217_DAPI_VeCad_Phalloidin_siCTR_5.tif	76
																											685	1			676	1			685	VeCad_DAPI_40x8bit_2016_11_07_siYap_2.tif	76			685	Exp2_13317_DAPI_VeCad_Phalloidin_siYap_2.tif	81
																											686	5			677	0			686	VeCad_DAPI_40x8bit_2016_11_07_siTaz_5.tif	0			686	Exp3_27217_DAPI_VeCad_Phalloidin_siYap_5.tif	32
																											687	4			678	5			687	VeCad_DAPI_40x8bit_2016_11_07_siCTR_2.tif	5			687	Exp3_27217_DAPI_VeCad_Phalloidin_siCTR_2.tif	42
																											688	0			679	2			688	VeCad_DAPI_40x8bit_2016_11_07_siYapTaz_2.tif	64			688	Exp3_27217_DAPI_VeCad_Phalloidin_siCTR_3.tif	14
																											689	3			680	5			689	VeCad_DAPI_40x8bit_2016_11_07_siYapTaz_3.tif	59			689	Exp2_13317_DAPI_VeCad_Phalloidin_siCTR_4.tif	70
																											690	0			681	5			690	VeCad_DAPI_40x8bit_2016_11_07_siCTR_2.tif	89			690	Exp3_27217_DAPI_VeCad_Phalloidin_siCTR_3.tif	25
																											691	3			682	3			691	VeCad_DAPI_40x8bit_2016_11_07_siYap_1.tif	39			691	Exp2_13317_DAPI_VeCad_Phalloidin_siYapTaz_5.tif	46
																											692	5			683	1			692	VeCad_DAPI_40x8bit_2016_11_07_siYapTaz_5.tif	90			692	Exp2_13317_DAPI_VeCad_Phalloidin_siYapTaz_2.tif	53
																											693	4			684	0			693	VeCad_DAPI_40x8bit_2016_11_07_siCTR_2.tif	82			693	Exp2_13317_DAPI_VeCad_Phalloidin_siCTR_2.tif	39
																											694	0			685	1			694	VeCad_DAPI_40x8bit_2016_11_07_siTaz_1.tif	83			694	Exp2_13317_DAPI_VeCad_Phalloidin_siTaz_5.tif	5
																											695	0			686	1			695	VeCad_DAPI_40x8bit_2016_11_07_siYapTaz_3.tif	94			695	Exp2_13317_DAPI_VeCad_Phalloidin_siCTR_4.tif	20
																											696	2			687	0			696	VeCad_DAPI_40x8bit_2016_11_07_siCTR_3.tif	76			696	Exp3_27217_DAPI_VeCad_Phalloidin_siYapTaz_5.tif	38
																											697	4			688	3			697	VeCad_DAPI_40x8bit_2016_11_07_siTaz_3.tif	14			697	Exp3_27217_DAPI_VeCad_Phalloidin_siYapTaz_3.tif	71
																											698	3			689	3			698	VeCad_DAPI_40x8bit_2016_11_07_siCTR_2.tif	41			698	Exp2_13317_DAPI_VeCad_Phalloidin_siYapTaz_1.tif	76
																											699	2			690	1			699	VeCad_DAPI_40x8bit_2016_11_07_siYap_4.tif	14			699	Exp3_27217_DAPI_VeCad_Phalloidin_siYap_2.tif	61
																											700	0			691	1			700	VeCad_DAPI_40x8bit_2016_11_07_siTaz_2.tif	1			700	Exp2_13317_DAPI_VeCad_Phalloidin_siYap_2.tif	71
																											701	3			692	1			701	VeCad_DAPI_40x8bit_2016_11_07_siTaz_4.tif	80			701	Exp3_27217_DAPI_VeCad_Phalloidin_siYapTaz_4.tif	57
																											702	1			693	1			702	VeCad_DAPI_40x8bit_2016_11_07_siYap_1.tif	38			702	Exp2_13317_DAPI_VeCad_Phalloidin_siYap_2.tif	31
																											703	1			694	5			703	VeCad_DAPI_40x8bit_2016_11_07_siTaz_5.tif	78			703	Exp3_27217_DAPI_VeCad_Phalloidin_siCTR_4.tif	3
																											704	1			695	0			704	VeCad_DAPI_40x8bit_2016_11_07_siCTR_2.tif	27			704	Exp2_13317_DAPI_VeCad_Phalloidin_siCTR_4.tif	77
																											705	6			696	3			705	VeCad_DAPI_40x8bit_2016_11_07_siYapTaz_3.tif	65			705	Exp3_27217_DAPI_VeCad_Phalloidin_siYap_2.tif	76
																											706	0			697	0			706	VeCad_DAPI_40x8bit_2016_11_07_siTaz_2.tif	68			706	Exp2_13317_DAPI_VeCad_Phalloidin_siCTR_4.tif	93
																											707	0			698	2			707	VeCad_DAPI_40x8bit_2016_11_07_siYapTaz_1.tif	40			707	Exp2_13317_DAPI_VeCad_Phalloidin_siYap_1.tif	97
																											708	5			699	0			708	VeCad_DAPI_40x8bit_2016_11_07_siCTR_4.tif	51			708	Exp2_13317_DAPI_VeCad_Phalloidin_siYapTaz_4.tif	10
																											709	0			700	1			709	VeCad_DAPI_40x8bit_2016_11_07_siTaz_5.tif	65			709	Exp3_27217_DAPI_VeCad_Phalloidin_siYap_1.tif	77
																											710	2			701	3			710	VeCad_DAPI_40x8bit_2016_11_07_siCTR_5.tif	92			710	Exp3_27217_DAPI_VeCad_Phalloidin_siYapTaz_5.tif	3
																											711	3			702	0			711	VeCad_DAPI_40x8bit_2016_11_07_siCTR_2.tif	83			711	Exp2_13317_DAPI_VeCad_Phalloidin_siYap_1.tif	63
																											712	0			703	5			712	VeCad_DAPI_40x8bit_2016_11_07_siYap_2.tif	92			712	Exp2_13317_DAPI_VeCad_Phalloidin_siTaz_4.tif	98
																											713	5			704	1			713	VeCad_DAPI_40x8bit_2016_11_07_siYapTaz_4.tif	77			713	Exp2_13317_DAPI_VeCad_Phalloidin_siYapTaz_4.tif	80
																											714	5			705	2			714	VeCad_DAPI_40x8bit_2016_11_07_siYapTaz_4.tif	58			714	Exp3_27217_DAPI_VeCad_Phalloidin_siYapTaz_2.tif	8
																											715	3			706	3			715	VeCad_DAPI_40x8bit_2016_11_07_siCTR_5.tif	85			715	Exp2_13317_DAPI_VeCad_Phalloidin_siCTR_3.tif	7
																											716	2			707	1			716	VeCad_DAPI_40x8bit_2016_11_07_siCTR_2.tif	95			716	Exp3_27217_DAPI_VeCad_Phalloidin_siCTR_5.tif	57
																											717	4			708	5			717	VeCad_DAPI_40x8bit_2016_11_07_siCTR_4.tif	14			717	Exp2_13317_DAPI_VeCad_Phalloidin_siYapTaz_3.tif	96
																											718	2			709	1			718	VeCad_DAPI_40x8bit_2016_11_07_siCTR_1.tif	54			718	Exp3_27217_DAPI_VeCad_Phalloidin_siYapTaz_5.tif	2
																											719	0			710	5			719	VeCad_DAPI_40x8bit_2016_11_07_siYap_3.tif	81			719	Exp2_13317_DAPI_VeCad_Phalloidin_siTaz_5.tif	54
																											720	1			711	1			720	VeCad_DAPI_40x8bit_2016_11_07_siCTR_5.tif	44			720	Exp3_27217_DAPI_VeCad_Phalloidin_siYap_1.tif	99
																											721	3			712	3			721	VeCad_DAPI_40x8bit_2016_11_07_siTaz_3.tif	40			721	Exp3_27217_DAPI_VeCad_Phalloidin_siCTR_5.tif	19
																											722	2			713	0			722	VeCad_DAPI_40x8bit_2016_11_07_siYap_3.tif	88			722	Exp2_13317_DAPI_VeCad_Phalloidin_siYap_4.tif	56
																											723	0			714	5			723	VeCad_DAPI_40x8bit_2016_11_07_siCTR_2.tif	60			723	Exp2_13317_DAPI_VeCad_Phalloidin_siTaz_5.tif	20
																											724	0			715	3			724	VeCad_DAPI_40x8bit_2016_11_07_siCTR_5.tif	93			724	Exp2_13317_DAPI_VeCad_Phalloidin_siCTR_1.tif	40
																											725	5			716	1			725	VeCad_DAPI_40x8bit_2016_11_07_siYapTaz_2.tif	26			725	Exp3_27217_DAPI_VeCad_Phalloidin_siCTR_5.tif	98
																											726	5			717	5			726	VeCad_DAPI_40x8bit_2016_11_07_siTaz_5.tif	8			726	Exp2_13317_DAPI_VeCad_Phalloidin_siTaz_2.tif	79
																											727	0			718	1			727	VeCad_DAPI_40x8bit_2016_11_07_siYapTaz_4.tif	56			727	Exp2_13317_DAPI_VeCad_Phalloidin_siYap_4.tif	65
																											728	4			719	3			728	VeCad_DAPI_40x8bit_2016_11_07_siYapTaz_4.tif	54			728	Exp2_13317_DAPI_VeCad_Phalloidin_siYap_4.tif	69
																											729	4			720	0			729	VeCad_DAPI_40x8bit_2016_11_07_siCTR_5.tif	41			729	Exp3_27217_DAPI_VeCad_Phalloidin_siCTR_3.tif	42
																											730	0			721	5			730	VeCad_DAPI_40x8bit_2016_11_07_siYap_3.tif	1			730	Exp2_13317_DAPI_VeCad_Phalloidin_siYapTaz_3.tif	30
																											731	3			722	0			731	VeCad_DAPI_40x8bit_2016_11_07_siCTR_3.tif	44			731	Exp2_13317_DAPI_VeCad_Phalloidin_siYap_5.tif	43
																											732	2			723	0			732	VeCad_DAPI_40x8bit_2016_11_07_siTaz_4.tif	77			732	Exp3_27217_DAPI_VeCad_Phalloidin_siCTR_5.tif	67
																											733	3	5		724	4			733	VeCad_DAPI_40x8bit_2016_11_07_siTaz_4.tif	11			733	Exp3_27217_DAPI_VeCad_Phalloidin_siYapTaz_4.tif	79
																											734	2			725	4			734	VeCad_DAPI_40x8bit_2016_11_07_siCTR_2.tif	74			734	Exp2_13317_DAPI_VeCad_Phalloidin_siYap_2.tif	76
																											735	0			726	5			735	VeCad_DAPI_40x8bit_2016_11_07_siYapTaz_2.tif	8			735	Exp3_27217_DAPI_VeCad_Phalloidin_siYapTaz_2.tif	57
																											736	1			727	1			736	VeCad_DAPI_40x8bit_2016_11_07_siYap_2.tif	34			736	Exp3_27217_DAPI_VeCad_Phalloidin_siYap_1.tif	93
																											737	2	5		728	1			737	VeCad_DAPI_40x8bit_2016_11_07_siTaz_4.tif	2			737	Exp3_27217_DAPI_VeCad_Phalloidin_siYapTaz_5.tif	11
																											738	4			729	4			738	VeCad_DAPI_40x8bit_2016_11_07_siCTR_4.tif	76			738	Exp2_13317_DAPI_VeCad_Phalloidin_siYap_2.tif	86
																											739	2			730	5			739	VeCad_DAPI_40x8bit_2016_11_07_siYapTaz_3.tif	79			739	Exp3_27217_DAPI_VeCad_Phalloidin_siYapTaz_2.tif	60
																											740	2			731	1			740	VeCad_DAPI_40x8bit_2016_11_07_siYapTaz_5.tif	96			740	Exp2_13317_DAPI_VeCad_Phalloidin_siCTR_5.tif	63
																											741	4			732	5			741	VeCad_DAPI_40x8bit_2016_11_07_siCTR_3.tif	47			741	Exp3_27217_DAPI_VeCad_Phalloidin_siYap_5.tif	53
																											742	2			733	0			742	VeCad_DAPI_40x8bit_2016_11_07_siYapTaz_3.tif	42			742	Exp2_13317_DAPI_VeCad_Phalloidin_siTaz_1.tif	7
																											743	5			734	1			743	VeCad_DAPI_40x8bit_2016_11_07_siYap_4.tif	26			743	Exp2_13317_DAPI_VeCad_Phalloidin_siTaz_3.tif	92
																											744	3			735	0			744	VeCad_DAPI_40x8bit_2016_11_07_siTaz_4.tif	82			744	Exp3_27217_DAPI_VeCad_Phalloidin_siYap_3.tif	18
																											745	5			736	0			745	VeCad_DAPI_40x8bit_2016_11_07_siTaz_4.tif	49			745	Exp3_27217_DAPI_VeCad_Phalloidin_siCTR_3.tif	46
																											746	2			737	5			746	VeCad_DAPI_40x8bit_2016_11_07_siYap_5.tif	60			746	Exp3_27217_DAPI_VeCad_Phalloidin_siCTR_1.tif	79
																											747	0			738	1			747	VeCad_DAPI_40x8bit_2016_11_07_siYap_3.tif	47			747	Exp2_13317_DAPI_VeCad_Phalloidin_siYap_5.tif	49
																											748	0			739	5			748	VeCad_DAPI_40x8bit_2016_11_07_siTaz_1.tif	29			748	Exp2_13317_DAPI_VeCad_Phalloidin_siTaz_2.tif	80
																											749	1			740	5			749	VeCad_DAPI_40x8bit_2016_11_07_siTaz_5.tif	20			749	Exp2_13317_DAPI_VeCad_Phalloidin_siYap_2.tif	4
																											750	6			741	1			750	VeCad_DAPI_40x8bit_2016_11_07_siYap_2.tif	67			750	Exp2_13317_DAPI_VeCad_Phalloidin_siTaz_1.tif	18
																											751	0			742	3			751	VeCad_DAPI_40x8bit_2016_11_07_siTaz_3.tif	94			751	Exp3_27217_DAPI_VeCad_Phalloidin_siCTR_4.tif	17
																											752	3			743	2			752	VeCad_DAPI_40x8bit_2016_11_07_siYapTaz_1.tif	51			752	Exp2_13317_DAPI_VeCad_Phalloidin_siCTR_1.tif	86
																											753	0			744	2			753	VeCad_DAPI_40x8bit_2016_11_07_siYapTaz_1.tif	13			753	Exp2_13317_DAPI_VeCad_Phalloidin_siYap_5.tif	81
																											754	4			745	1			754	VeCad_DAPI_40x8bit_2016_11_07_siYapTaz_3.tif	71			754	Exp2_13317_DAPI_VeCad_Phalloidin_siYapTaz_4.tif	96
																											755	0			746	3			755	VeCad_DAPI_40x8bit_2016_11_07_siYapTaz_1.tif	27			755	Exp2_13317_DAPI_VeCad_Phalloidin_siYap_2.tif	50
																											756	0			747	2			756	VeCad_DAPI_40x8bit_2016_11_07_siTaz_2.tif	40			756	Exp2_13317_DAPI_VeCad_Phalloidin_siYap_5.tif	33
																											757	2			748	5			757	VeCad_DAPI_40x8bit_2016_11_07_siCTR_4.tif	1			757	Exp3_27217_DAPI_VeCad_Phalloidin_siCTR_1.tif	94
																											758	0			749	0			758	VeCad_DAPI_40x8bit_2016_11_07_siCTR_1.tif	56			758	Exp2_13317_DAPI_VeCad_Phalloidin_siYapTaz_1.tif	63
																											759	1			750	0			759	VeCad_DAPI_40x8bit_2016_11_07_siYapTaz_3.tif	66			759	Exp2_13317_DAPI_VeCad_Phalloidin_siCTR_4.tif	85
																											760	3	5		751	4			760	VeCad_DAPI_40x8bit_2016_11_07_siYapTaz_4.tif	82			760	Exp2_13317_DAPI_VeCad_Phalloidin_siYapTaz_4.tif	29
																											761	1			752	4			761	VeCad_DAPI_40x8bit_2016_11_07_siYap_2.tif	24			761	Exp3_27217_DAPI_VeCad_Phalloidin_siYap_2.tif	18
																											762	0			753	2			762	VeCad_DAPI_40x8bit_2016_11_07_siTaz_5.tif	2			762	Exp2_13317_DAPI_VeCad_Phalloidin_siYap_1.tif	50
																											763	0			754	5			763	VeCad_DAPI_40x8bit_2016_11_07_siYap_4.tif	4			763	Exp2_13317_DAPI_VeCad_Phalloidin_siTaz_5.tif	31
																											764	0			755	1			764	VeCad_DAPI_40x8bit_2016_11_07_siYapTaz_2.tif	59			764	Exp2_13317_DAPI_VeCad_Phalloidin_siYap_2.tif	5
																											765	0			756	4			765	VeCad_DAPI_40x8bit_2016_11_07_siYapTaz_4.tif	11			765	Exp3_27217_DAPI_VeCad_Phalloidin_siCTR_4.tif	51
																											766	2			757	4			766	VeCad_DAPI_40x8bit_2016_11_07_siCTR_5.tif	10			766	Exp2_13317_DAPI_VeCad_Phalloidin_siYapTaz_5.tif	58
																											767	3			758	2			767	VeCad_DAPI_40x8bit_2016_11_07_siTaz_4.tif	34			767	Exp2_13317_DAPI_VeCad_Phalloidin_siYapTaz_3.tif	45
																											768	0			759	0			768	VeCad_DAPI_40x8bit_2016_11_07_siYapTaz_5.tif	47			768	Exp2_13317_DAPI_VeCad_Phalloidin_siTaz_2.tif	44
																											769	4			760	0			769	VeCad_DAPI_40x8bit_2016_11_07_siCTR_3.tif	42			769	Exp3_27217_DAPI_VeCad_Phalloidin_siCTR_5.tif	43
																											770	2			761	2			770	VeCad_DAPI_40x8bit_2016_11_07_siYap_1.tif	28			770	Exp2_13317_DAPI_VeCad_Phalloidin_siYap_2.tif	18
																											771	4			762	1			771	VeCad_DAPI_40x8bit_2016_11_07_siTaz_2.tif	88			771	Exp2_13317_DAPI_VeCad_Phalloidin_siYapTaz_4.tif	69
																											772	0			763	5			772	VeCad_DAPI_40x8bit_2016_11_07_siYapTaz_4.tif	62			772	Exp2_13317_DAPI_VeCad_Phalloidin_siYapTaz_4.tif	40
																											773	4			764	1			773	VeCad_DAPI_40x8bit_2016_11_07_siCTR_3.tif	54			773	Exp2_13317_DAPI_VeCad_Phalloidin_siYap_1.tif	18
																											774	2			765	1			774	VeCad_DAPI_40x8bit_2016_11_07_siYap_1.tif	59			774	Exp3_27217_DAPI_VeCad_Phalloidin_siYap_1.tif	57
																											775	4			766	0			775	VeCad_DAPI_40x8bit_2016_11_07_siCTR_4.tif	86			775	Exp2_13317_DAPI_VeCad_Phalloidin_siYap_3.tif	50
																											776	0			767	0			776	VeCad_DAPI_40x8bit_2016_11_07_siTaz_5.tif	22			776	Exp3_27217_DAPI_VeCad_Phalloidin_siYap_3.tif	1
																											777	5			768	2			777	VeCad_DAPI_40x8bit_2016_11_07_siYapTaz_4.tif	89			777	Exp2_13317_DAPI_VeCad_Phalloidin_siYapTaz_2.tif	14
																											778	1			769	5			778	VeCad_DAPI_40x8bit_2016_11_07_siYapTaz_4.tif	10			778	Exp2_13317_DAPI_VeCad_Phalloidin_siTaz_3.tif	50
																											779	0			770	1			779	VeCad_DAPI_40x8bit_2016_11_07_siYapTaz_3.tif	6			779	Exp2_13317_DAPI_VeCad_Phalloidin_siYap_4.tif	19
																											780	0			771	0			780	VeCad_DAPI_40x8bit_2016_11_07_siTaz_5.tif	88			780	Exp2_13317_DAPI_VeCad_Phalloidin_siYap_4.tif	88
																											781	3			772	3			781	VeCad_DAPI_40x8bit_2016_11_07_siCTR_2.tif	45			781	Exp3_27217_DAPI_VeCad_Phalloidin_siCTR_4.tif	7
																											782	0			773	2			782	VeCad_DAPI_40x8bit_2016_11_07_siCTR_1.tif	75			782	Exp2_13317_DAPI_VeCad_Phalloidin_siYap_5.tif	20
																											783	4			774	1			783	VeCad_DAPI_40x8bit_2016_11_07_siCTR_3.tif	13			783	Exp3_27217_DAPI_VeCad_Phalloidin_siYapTaz_3.tif	64
																											784	0			775	0			784	VeCad_DAPI_40x8bit_2016_11_07_siYap_4.tif	53			784	Exp2_13317_DAPI_VeCad_Phalloidin_siTaz_5.tif	71
																											785	1			776	3			785	VeCad_DAPI_40x8bit_2016_11_07_siYapTaz_2.tif	58			785	Exp2_13317_DAPI_VeCad_Phalloidin_siCTR_2.tif	92
																											786	5			777	2			786	VeCad_DAPI_40x8bit_2016_11_07_siTaz_3.tif	12			786	Exp3_27217_DAPI_VeCad_Phalloidin_siCTR_3.tif	98
																											787	3			778	2			787	VeCad_DAPI_40x8bit_2016_11_07_siCTR_3.tif	59			787	Exp3_27217_DAPI_VeCad_Phalloidin_siCTR_4.tif	67
																											788	4			779	1			788	VeCad_DAPI_40x8bit_2016_11_07_siYap_1.tif	21			788	Exp2_13317_DAPI_VeCad_Phalloidin_siYapTaz_4.tif	18
																											789	2			780	1			789	VeCad_DAPI_40x8bit_2016_11_07_siCTR_3.tif	20			789	Exp3_27217_DAPI_VeCad_Phalloidin_siYap_2.tif	10
																											790	4			781	4			790	VeCad_DAPI_40x8bit_2016_11_07_siCTR_2.tif	52			790	Exp3_27217_DAPI_VeCad_Phalloidin_siYapTaz_2.tif	51
																											791	0			782	0			791	VeCad_DAPI_40x8bit_2016_11_07_siYapTaz_5.tif	11			791	Exp3_27217_DAPI_VeCad_Phalloidin_siYapTaz_3.tif	23
																											792	4			783	1			792	VeCad_DAPI_40x8bit_2016_11_07_siCTR_2.tif	76			792	Exp3_27217_DAPI_VeCad_Phalloidin_siCTR_2.tif	47
																											793	2			784	3			793	VeCad_DAPI_40x8bit_2016_11_07_siYapTaz_5.tif	14			793	Exp2_13317_DAPI_VeCad_Phalloidin_siYapTaz_4.tif	85
																											794	4			785	3			794	VeCad_DAPI_40x8bit_2016_11_07_siTaz_3.tif	95			794	Exp3_27217_DAPI_VeCad_Phalloidin_siCTR_4.tif	77
																											795	4			786	4			795	VeCad_DAPI_40x8bit_2016_11_07_siYapTaz_4.tif	66			795	Exp2_13317_DAPI_VeCad_Phalloidin_siYap_3.tif	4
																											796	4			787	5			796	VeCad_DAPI_40x8bit_2016_11_07_siYapTaz_3.tif	13			796	Exp2_13317_DAPI_VeCad_Phalloidin_siCTR_5.tif	92
																											797	0			788	2			797	VeCad_DAPI_40x8bit_2016_11_07_siYap_5.tif	72			797	Exp2_13317_DAPI_VeCad_Phalloidin_siYapTaz_2.tif	16
																											798	0			789	1			798	VeCad_DAPI_40x8bit_2016_11_07_siTaz_5.tif	97			798	Exp3_27217_DAPI_VeCad_Phalloidin_siYap_3.tif	62
																											799	0			790	5			799	VeCad_DAPI_40x8bit_2016_11_07_siTaz_1.tif	87			799	Exp2_13317_DAPI_VeCad_Phalloidin_siYapTaz_5.tif	95
																											800	5			791	2			800	VeCad_DAPI_40x8bit_2016_11_07_siYapTaz_4.tif	87			800	Exp2_13317_DAPI_VeCad_Phalloidin_siYap_4.tif	7
																											801	4			792	4			801	VeCad_DAPI_40x8bit_2016_11_07_siCTR_3.tif	68			801	Exp3_27217_DAPI_VeCad_Phalloidin_siCTR_1.tif	31
																											802	3			793	0			802	VeCad_DAPI_40x8bit_2016_11_07_siYapTaz_1.tif	69			802	Exp2_13317_DAPI_VeCad_Phalloidin_siCTR_4.tif	34
																											803	4			794	4			803	VeCad_DAPI_40x8bit_2016_11_07_siCTR_5.tif	35			803	Exp2_13317_DAPI_VeCad_Phalloidin_siCTR_1.tif	33
																											804	2			795	1			804	VeCad_DAPI_40x8bit_2016_11_07_siYap_4.tif	56			804	Exp2_13317_DAPI_VeCad_Phalloidin_siYapTaz_3.tif	21
																											805	4			796	2			805	VeCad_DAPI_40x8bit_2016_11_07_siCTR_2.tif	65			805	Exp2_13317_DAPI_VeCad_Phalloidin_siYap_4.tif	55
																											806	0			797	3			806	VeCad_DAPI_40x8bit_2016_11_07_siYap_3.tif	76			806	Exp3_27217_DAPI_VeCad_Phalloidin_siYap_1.tif	67
																											807	5			798	2			807	VeCad_DAPI_40x8bit_2016_11_07_siTaz_4.tif	48			807	Exp3_27217_DAPI_VeCad_Phalloidin_siYap_1.tif	9
																											808	2			799	1			808	VeCad_DAPI_40x8bit_2016_11_07_siCTR_5.tif	26			808	Exp2_13317_DAPI_VeCad_Phalloidin_siCTR_1.tif	61
																											809	3			800	0			809	VeCad_DAPI_40x8bit_2016_11_07_siCTR_5.tif	95			809	Exp3_27217_DAPI_VeCad_Phalloidin_siCTR_2.tif	66
																											810	0			801	2			810	VeCad_DAPI_40x8bit_2016_11_07_siTaz_1.tif	63			810	Exp2_13317_DAPI_VeCad_Phalloidin_siYapTaz_2.tif	80
																											811	1			802	0			811	VeCad_DAPI_40x8bit_2016_11_07_siYap_2.tif	74			811	Exp2_13317_DAPI_VeCad_Phalloidin_siCTR_4.tif	7
																											812	3			803	5			812	VeCad_DAPI_40x8bit_2016_11_07_siCTR_1.tif	52			812	Exp2_13317_DAPI_VeCad_Phalloidin_siCTR_4.tif	40
																											813	0			804	2			813	VeCad_DAPI_40x8bit_2016_11_07_siTaz_1.tif	9			813	Exp3_27217_DAPI_VeCad_Phalloidin_siCTR_2.tif	38
																											814	1			805	1			814	VeCad_DAPI_40x8bit_2016_11_07_siYap_2.tif	93			814	Exp3_27217_DAPI_VeCad_Phalloidin_siCTR_2.tif	12
																											815	2			806	0			815	VeCad_DAPI_40x8bit_2016_11_07_siYap_1.tif	31			815	Exp2_13317_DAPI_VeCad_Phalloidin_siCTR_3.tif	21
																											816	0			807	2			816	VeCad_DAPI_40x8bit_2016_11_07_siYap_2.tif	43			816	Exp2_13317_DAPI_VeCad_Phalloidin_siYap_2.tif	27
																											817	0			808	4			817	VeCad_DAPI_40x8bit_2016_11_07_siTaz_1.tif	31			817	Exp3_27217_DAPI_VeCad_Phalloidin_siYap_5.tif	92
																											818	2			809	0			818	VeCad_DAPI_40x8bit_2016_11_07_siYapTaz_3.tif	97			818	Exp3_27217_DAPI_VeCad_Phalloidin_siCTR_4.tif	99
																											819	3			810	2			819	VeCad_DAPI_40x8bit_2016_11_07_siYap_4.tif	29			819	Exp3_27217_DAPI_VeCad_Phalloidin_siYap_1.tif	83
																											820	2			811	0			820	VeCad_DAPI_40x8bit_2016_11_07_siYapTaz_5.tif	48			820	Exp3_27217_DAPI_VeCad_Phalloidin_siYapTaz_4.tif	7
																											821	0			812	1			821	VeCad_DAPI_40x8bit_2016_11_07_siYapTaz_5.tif	78			821	Exp3_27217_DAPI_VeCad_Phalloidin_siYap_1.tif	73
																											822	5			813	3			822	VeCad_DAPI_40x8bit_2016_11_07_siTaz_4.tif	51			822	Exp2_13317_DAPI_VeCad_Phalloidin_siTaz_5.tif	39
																											823	6			814	2			823	VeCad_DAPI_40x8bit_2016_11_07_siTaz_3.tif	84			823	Exp3_27217_DAPI_VeCad_Phalloidin_siYap_4.tif	91
																											824	2			815	3			824	VeCad_DAPI_40x8bit_2016_11_07_siYap_5.tif	68			824	Exp3_27217_DAPI_VeCad_Phalloidin_siYap_5.tif	13
																											825	0			816	1			825	VeCad_DAPI_40x8bit_2016_11_07_siTaz_2.tif	22			825	Exp2_13317_DAPI_VeCad_Phalloidin_siYap_1.tif	12
																											826	1			817	1			826	VeCad_DAPI_40x8bit_2016_11_07_siTaz_4.tif	76			826	Exp2_13317_DAPI_VeCad_Phalloidin_siCTR_4.tif	84
																											827	0			818	1			827	VeCad_DAPI_40x8bit_2016_11_07_siTaz_5.tif	68			827	Exp3_27217_DAPI_VeCad_Phalloidin_siCTR_4.tif	81
																											828	0			819	0			828	VeCad_DAPI_40x8bit_2016_11_07_siTaz_2.tif	7			828	Exp2_13317_DAPI_VeCad_Phalloidin_siYapTaz_5.tif	68
																											829	0			820	1			829	VeCad_DAPI_40x8bit_2016_11_07_siYapTaz_4.tif	68			829	Exp2_13317_DAPI_VeCad_Phalloidin_siCTR_3.tif	95
																											830	5			821	0			830	VeCad_DAPI_40x8bit_2016_11_07_siTaz_5.tif	14			830	Exp3_27217_DAPI_VeCad_Phalloidin_siYap_2.tif	28
																											831	4			822	3			831	VeCad_DAPI_40x8bit_2016_11_07_siTaz_4.tif	54			831	Exp3_27217_DAPI_VeCad_Phalloidin_siYapTaz_3.tif	62
																											832	2			823	5			832	VeCad_DAPI_40x8bit_2016_11_07_siYapTaz_5.tif	10			832	Exp3_27217_DAPI_VeCad_Phalloidin_siYap_2.tif	71
																											833	2			824	1			833	VeCad_DAPI_40x8bit_2016_11_07_siYapTaz_3.tif	29			833	Exp2_13317_DAPI_VeCad_Phalloidin_siCTR_5.tif	95
																											834	2			825	1			834	VeCad_DAPI_40x8bit_2016_11_07_siYap_1.tif	99			834	Exp2_13317_DAPI_VeCad_Phalloidin_siCTR_2.tif	51
																											835	0			826	3			835	VeCad_DAPI_40x8bit_2016_11_07_siYap_4.tif	37			835	Exp2_13317_DAPI_VeCad_Phalloidin_siTaz_3.tif	91
																											836	0			827	1			836	VeCad_DAPI_40x8bit_2016_11_07_siTaz_3.tif	61			836	Exp2_13317_DAPI_VeCad_Phalloidin_siCTR_4.tif	24
																											837	1	2		828	0			837	VeCad_DAPI_40x8bit_2016_11_07_siYap_5.tif	61			837	Exp2_13317_DAPI_VeCad_Phalloidin_siTaz_1.tif	39
																											838	0			829	3			838	VeCad_DAPI_40x8bit_2016_11_07_siYap_4.tif	57			838	Exp2_13317_DAPI_VeCad_Phalloidin_siYap_1.tif	8
																											839	2			830	0			839	VeCad_DAPI_40x8bit_2016_11_07_siCTR_2.tif	86			839	Exp2_13317_DAPI_VeCad_Phalloidin_siYap_3.tif	60
																											840	5			831	0			840	VeCad_DAPI_40x8bit_2016_11_07_siYapTaz_1.tif	21			840	Exp3_27217_DAPI_VeCad_Phalloidin_siYapTaz_1.tif	95
																											841	2			832	1			841	VeCad_DAPI_40x8bit_2016_11_07_siCTR_2.tif	13			841	Exp3_27217_DAPI_VeCad_Phalloidin_siYapTaz_2.tif	25
																											842	3			833	5			842	VeCad_DAPI_40x8bit_2016_11_07_siTaz_3.tif	81			842	Exp3_27217_DAPI_VeCad_Phalloidin_siCTR_2.tif	54
																											843	0			834	4			843	VeCad_DAPI_40x8bit_2016_11_07_siTaz_2.tif	2			843	Exp2_13317_DAPI_VeCad_Phalloidin_siYapTaz_3.tif	32
																											844	0			835	5			844	VeCad_DAPI_40x8bit_2016_11_07_siTaz_5.tif	34			844	Exp2_13317_DAPI_VeCad_Phalloidin_siTaz_1.tif	41
																											845	5			836	5			845	VeCad_DAPI_40x8bit_2016_11_07_siTaz_4.tif	47			845	Exp3_27217_DAPI_VeCad_Phalloidin_siCTR_4.tif	94
																											846	4			837	3			846	VeCad_DAPI_40x8bit_2016_11_07_siCTR_3.tif	18			846	Exp3_27217_DAPI_VeCad_Phalloidin_siYapTaz_1.tif	32
																											847	5			838	2			847	VeCad_DAPI_40x8bit_2016_11_07_siYapTaz_1.tif	29			847	Exp2_13317_DAPI_VeCad_Phalloidin_siCTR_3.tif	59
																											848	0			839	1			848	VeCad_DAPI_40x8bit_2016_11_07_siTaz_2.tif	92			848	Exp2_13317_DAPI_VeCad_Phalloidin_siYapTaz_2.tif	15
																											849	0			840	0			849	VeCad_DAPI_40x8bit_2016_11_07_siYap_5.tif	34			849	Exp3_27217_DAPI_VeCad_Phalloidin_siCTR_5.tif	93
																											850	5			841	1			850	VeCad_DAPI_40x8bit_2016_11_07_siCTR_2.tif	49			850	Exp2_13317_DAPI_VeCad_Phalloidin_siCTR_1.tif	68
																											851	5			842	4			851	VeCad_DAPI_40x8bit_2016_11_07_siYapTaz_1.tif	75			851	Exp2_13317_DAPI_VeCad_Phalloidin_siTaz_5.tif	16
																											852	3			843	0			852	VeCad_DAPI_40x8bit_2016_11_07_siYapTaz_1.tif	44			852	Exp3_27217_DAPI_VeCad_Phalloidin_siYapTaz_5.tif	31
																											853	2	1		844	2			853	VeCad_DAPI_40x8bit_2016_11_07_siCTR_5.tif	72			853	Exp3_27217_DAPI_VeCad_Phalloidin_siCTR_2.tif	21
																											854	0			845	0			854	VeCad_DAPI_40x8bit_2016_11_07_siTaz_1.tif	64			854	Exp2_13317_DAPI_VeCad_Phalloidin_siYapTaz_5.tif	84
																											855	4			846	0			855	VeCad_DAPI_40x8bit_2016_11_07_siYapTaz_2.tif	17			855	Exp2_13317_DAPI_VeCad_Phalloidin_siYap_1.tif	7
																											856	0			847	4			856	VeCad_DAPI_40x8bit_2016_11_07_siCTR_2.tif	85			856	Exp3_27217_DAPI_VeCad_Phalloidin_siYap_1.tif	22
																											857	0			848	5			857	VeCad_DAPI_40x8bit_2016_11_07_siYap_4.tif	31			857	Exp3_27217_DAPI_VeCad_Phalloidin_siCTR_4.tif	85
																											858	0			849	4			858	VeCad_DAPI_40x8bit_2016_11_07_siYapTaz_4.tif	80			858	Exp2_13317_DAPI_VeCad_Phalloidin_siYapTaz_4.tif	54
																											859	0			850	0			859	VeCad_DAPI_40x8bit_2016_11_07_siYap_2.tif	9			859	Exp2_13317_DAPI_VeCad_Phalloidin_siYap_3.tif	79
																											860	0			851	3			860	VeCad_DAPI_40x8bit_2016_11_07_siYapTaz_1.tif	17			860	Exp2_13317_DAPI_VeCad_Phalloidin_siCTR_5.tif	93
																											861	2			852	5			861	VeCad_DAPI_40x8bit_2016_11_07_siCTR_4.tif	93			861	Exp3_27217_DAPI_VeCad_Phalloidin_siCTR_2.tif	70
																											862	2	1		853	5			862	VeCad_DAPI_40x8bit_2016_11_07_siYap_1.tif	26			862	Exp3_27217_DAPI_VeCad_Phalloidin_siYapTaz_2.tif	75
																											863	0			854	2			863	VeCad_DAPI_40x8bit_2016_11_07_siYapTaz_1.tif	35			863	Exp2_13317_DAPI_VeCad_Phalloidin_siYap_5.tif	1
																											864	2			855	2			864	VeCad_DAPI_40x8bit_2016_11_07_siYapTaz_4.tif	18			864	Exp2_13317_DAPI_VeCad_Phalloidin_siYap_5.tif	76
																											865	0			856	2			865	VeCad_DAPI_40x8bit_2016_11_07_siYap_1.tif	34			865	Exp2_13317_DAPI_VeCad_Phalloidin_siTaz_2.tif	36
																											866	2			857	3			866	VeCad_DAPI_40x8bit_2016_11_07_siYapTaz_3.tif	1			866	Exp2_13317_DAPI_VeCad_Phalloidin_siYapTaz_5.tif	43
																											867	5			858	2			867	VeCad_DAPI_40x8bit_2016_11_07_siYapTaz_1.tif	80			867	Exp3_27217_DAPI_VeCad_Phalloidin_siYapTaz_2.tif	52
																											868	5			859	1			868	VeCad_DAPI_40x8bit_2016_11_07_siYapTaz_4.tif	8			868	Exp3_27217_DAPI_VeCad_Phalloidin_siCTR_4.tif	89
																											869	0			860	0			869	VeCad_DAPI_40x8bit_2016_11_07_siTaz_1.tif	91			869	Exp2_13317_DAPI_VeCad_Phalloidin_siYapTaz_1.tif	53
																											870	2			861	5			870	VeCad_DAPI_40x8bit_2016_11_07_siYap_2.tif	68			870	Exp2_13317_DAPI_VeCad_Phalloidin_siTaz_3.tif	45
																											871	1			862	0			871	VeCad_DAPI_40x8bit_2016_11_07_siYap_5.tif	83			871	Exp2_13317_DAPI_VeCad_Phalloidin_siCTR_4.tif	14
																											872	0			863	1			872	VeCad_DAPI_40x8bit_2016_11_07_siYap_2.tif	56			872	Exp3_27217_DAPI_VeCad_Phalloidin_siCTR_5.tif	6
																											873	1			864	5			873	VeCad_DAPI_40x8bit_2016_11_07_siYap_4.tif	38			873	Exp2_13317_DAPI_VeCad_Phalloidin_siYapTaz_5.tif	92
																											874	0			865	0			874	VeCad_DAPI_40x8bit_2016_11_07_siYapTaz_3.tif	18			874	Exp2_13317_DAPI_VeCad_Phalloidin_siYapTaz_4.tif	91
																											875	0			866	5			875	VeCad_DAPI_40x8bit_2016_11_07_siYap_3.tif	19			875	Exp3_27217_DAPI_VeCad_Phalloidin_siCTR_5.tif	62
																											876	4			867	0			876	VeCad_DAPI_40x8bit_2016_11_07_siCTR_4.tif	99			876	Exp3_27217_DAPI_VeCad_Phalloidin_siYapTaz_3.tif	46
																											877	0			868	4			877	VeCad_DAPI_40x8bit_2016_11_07_siYap_3.tif	20			877	Exp3_27217_DAPI_VeCad_Phalloidin_siCTR_5.tif	89
																											878	0			869	3			878	VeCad_DAPI_40x8bit_2016_11_07_siTaz_3.tif	11			878	Exp3_27217_DAPI_VeCad_Phalloidin_siYapTaz_4.tif	56
																											879	3			870	5			879	VeCad_DAPI_40x8bit_2016_11_07_siYapTaz_1.tif	57			879	Exp3_27217_DAPI_VeCad_Phalloidin_siYap_5.tif	9
																											880	4			871	3			880	VeCad_DAPI_40x8bit_2016_11_07_siCTR_5.tif	39			880	Exp2_13317_DAPI_VeCad_Phalloidin_siYap_4.tif	12
																											881	1			872	5			881	VeCad_DAPI_40x8bit_2016_11_07_siYap_2.tif	48			881	Exp3_27217_DAPI_VeCad_Phalloidin_siYap_5.tif	27
																											882	2			873	2			882	VeCad_DAPI_40x8bit_2016_11_07_siYap_3.tif	24			882	Exp3_27217_DAPI_VeCad_Phalloidin_siCTR_3.tif	99
																											883	0			874	3			883	VeCad_DAPI_40x8bit_2016_11_07_siYap_4.tif	72			883	Exp2_13317_DAPI_VeCad_Phalloidin_siYapTaz_4.tif	84
																											884	1			875	0			884	VeCad_DAPI_40x8bit_2016_11_07_siYap_4.tif	33			884	Exp2_13317_DAPI_VeCad_Phalloidin_siYapTaz_5.tif	11
																											885	2			876	1			885	VeCad_DAPI_40x8bit_2016_11_07_siCTR_3.tif	4			885	Exp2_13317_DAPI_VeCad_Phalloidin_siCTR_1.tif	80
																											886	3			877	0			886	VeCad_DAPI_40x8bit_2016_11_07_siTaz_2.tif	89			886	Exp2_13317_DAPI_VeCad_Phalloidin_siCTR_2.tif	56
																											887	4			878	0			887	VeCad_DAPI_40x8bit_2016_11_07_siCTR_4.tif	79			887	Exp3_27217_DAPI_VeCad_Phalloidin_siYapTaz_5.tif	0
																											888	2			879	0			888	VeCad_DAPI_40x8bit_2016_11_07_siCTR_3.tif	45			888	Exp3_27217_DAPI_VeCad_Phalloidin_siCTR_1.tif	88
																											889	1			880	0			889	VeCad_DAPI_40x8bit_2016_11_07_siYap_1.tif	52			889	Exp2_13317_DAPI_VeCad_Phalloidin_siTaz_4.tif	31
																											890	0			881	0			890	VeCad_DAPI_40x8bit_2016_11_07_siTaz_3.tif	83			890	Exp2_13317_DAPI_VeCad_Phalloidin_siTaz_5.tif	40
																											891	1			882	4			891	VeCad_DAPI_40x8bit_2016_11_07_siTaz_4.tif	67			891	Exp3_27217_DAPI_VeCad_Phalloidin_siCTR_5.tif	22
																											892	0			883	0			892	VeCad_DAPI_40x8bit_2016_11_07_siTaz_1.tif	41			892	Exp2_13317_DAPI_VeCad_Phalloidin_siYap_3.tif	16
																											893	0			884	3			893	VeCad_DAPI_40x8bit_2016_11_07_siYapTaz_1.tif	34			893	Exp2_13317_DAPI_VeCad_Phalloidin_siCTR_2.tif	32
																											894	2			885	1			894	VeCad_DAPI_40x8bit_2016_11_07_siYap_1.tif	84			894	Exp2_13317_DAPI_VeCad_Phalloidin_siYapTaz_5.tif	24
																											895	2			886	2			895	VeCad_DAPI_40x8bit_2016_11_07_siYap_4.tif	36			895	Exp3_27217_DAPI_VeCad_Phalloidin_siYap_2.tif	72
																											896	2			887	1			896	VeCad_DAPI_40x8bit_2016_11_07_siCTR_1.tif	73			896	Exp2_13317_DAPI_VeCad_Phalloidin_siCTR_2.tif	81
																											897	5			888	5			897	VeCad_DAPI_40x8bit_2016_11_07_siTaz_4.tif	12			897	Exp3_27217_DAPI_VeCad_Phalloidin_siYap_4.tif	83
																											898	4			889	3			898	VeCad_DAPI_40x8bit_2016_11_07_siCTR_2.tif	84			898	Exp2_13317_DAPI_VeCad_Phalloidin_siTaz_5.tif	7
																											899	1			890	2			899	VeCad_DAPI_40x8bit_2016_11_07_siYapTaz_3.tif	51			899	Exp3_27217_DAPI_VeCad_Phalloidin_siYap_3.tif	11
																											900	1			891	0			900	VeCad_DAPI_40x8bit_2016_11_07_siYap_5.tif	99			900	Exp2_13317_DAPI_VeCad_Phalloidin_siYapTaz_3.tif	40
																											901	0			892	1			901	VeCad_DAPI_40x8bit_2016_11_07_siTaz_1.tif	42			901	Exp3_27217_DAPI_VeCad_Phalloidin_siCTR_2.tif	81
																											902	5			893	0			902	VeCad_DAPI_40x8bit_2016_11_07_siTaz_4.tif	84			902	Exp3_27217_DAPI_VeCad_Phalloidin_siCTR_2.tif	5
																											903	3			894	0			903	VeCad_DAPI_40x8bit_2016_11_07_siYapTaz_4.tif	19			903	Exp2_13317_DAPI_VeCad_Phalloidin_siCTR_4.tif	64
																											904	0			895	1			904	VeCad_DAPI_40x8bit_2016_11_07_siYapTaz_3.tif	99			904	Exp3_27217_DAPI_VeCad_Phalloidin_siYap_3.tif	45
																											905	5			896	4			905	VeCad_DAPI_40x8bit_2016_11_07_siTaz_3.tif	98			905	Exp2_13317_DAPI_VeCad_Phalloidin_siTaz_2.tif	77
																											906	1			897	1			906	VeCad_DAPI_40x8bit_2016_11_07_siYap_2.tif	94			906	Exp3_27217_DAPI_VeCad_Phalloidin_siYap_2.tif	95
																											907	0			898	5			907	VeCad_DAPI_40x8bit_2016_11_07_siCTR_1.tif	9			907	Exp3_27217_DAPI_VeCad_Phalloidin_siYapTaz_5.tif	50
																											908	4			899	0			908	VeCad_DAPI_40x8bit_2016_11_07_siTaz_3.tif	58			908	Exp3_27217_DAPI_VeCad_Phalloidin_siCTR_1.tif	20
																											909	1			900	0			909	VeCad_DAPI_40x8bit_2016_11_07_siYapTaz_4.tif	13			909	Exp2_13317_DAPI_VeCad_Phalloidin_siYap_5.tif	25
																											910	2			901	2			910	VeCad_DAPI_40x8bit_2016_11_07_siYapTaz_4.tif	75			910	Exp2_13317_DAPI_VeCad_Phalloidin_siCTR_4.tif	22
																											911	1			902	0			911	VeCad_DAPI_40x8bit_2016_11_07_siYapTaz_3.tif	30			911	Exp3_27217_DAPI_VeCad_Phalloidin_siYap_3.tif	69
																											912	2			903	0			912	VeCad_DAPI_40x8bit_2016_11_07_siTaz_5.tif	36			912	Exp2_13317_DAPI_VeCad_Phalloidin_siYap_4.tif	74
																											913	4			904	0			913	VeCad_DAPI_40x8bit_2016_11_07_siCTR_2.tif	18			913	Exp3_27217_DAPI_VeCad_Phalloidin_siYap_4.tif	62
																											914	1			905	3			914	VeCad_DAPI_40x8bit_2016_11_07_siYap_4.tif	94			914	Exp3_27217_DAPI_VeCad_Phalloidin_siYapTaz_5.tif	94
																											915	0			906	2			915	VeCad_DAPI_40x8bit_2016_11_07_siYapTaz_1.tif	8			915	Exp2_13317_DAPI_VeCad_Phalloidin_siTaz_3.tif	72
																											916	3			907	5			916	VeCad_DAPI_40x8bit_2016_11_07_siCTR_2.tif	58			916	Exp2_13317_DAPI_VeCad_Phalloidin_siCTR_4.tif	72
																											917	2			908	5			917	VeCad_DAPI_40x8bit_2016_11_07_siCTR_2.tif	61			917	Exp2_13317_DAPI_VeCad_Phalloidin_siCTR_5.tif	1
																											918	3			909	1			918	VeCad_DAPI_40x8bit_2016_11_07_siYapTaz_3.tif	91			918	Exp3_27217_DAPI_VeCad_Phalloidin_siYap_5.tif	19
																											919	1			910	2			919	VeCad_DAPI_40x8bit_2016_11_07_siCTR_5.tif	56			919	Exp2_13317_DAPI_VeCad_Phalloidin_siYap_5.tif	48
																											920	0			911	2			920	VeCad_DAPI_40x8bit_2016_11_07_siCTR_5.tif	61			920	Exp2_13317_DAPI_VeCad_Phalloidin_siYap_3.tif	57
																											921	5			912	1			921	VeCad_DAPI_40x8bit_2016_11_07_siYapTaz_2.tif	41			921	Exp2_13317_DAPI_VeCad_Phalloidin_siCTR_3.tif	6
																											922	0			913	1			922	VeCad_DAPI_40x8bit_2016_11_07_siTaz_1.tif	68			922	Exp2_13317_DAPI_VeCad_Phalloidin_siYapTaz_3.tif	55
																											923	2			914	0			923	VeCad_DAPI_40x8bit_2016_11_07_siYap_5.tif	50			923	Exp2_13317_DAPI_VeCad_Phalloidin_siCTR_5.tif	56
																											924	2			915	2			924	VeCad_DAPI_40x8bit_2016_11_07_siTaz_3.tif	93			924	Exp2_13317_DAPI_VeCad_Phalloidin_siTaz_1.tif	35
																											925	1			916	3			925	VeCad_DAPI_40x8bit_2016_11_07_siYap_4.tif	87			925	Exp2_13317_DAPI_VeCad_Phalloidin_siYap_2.tif	83
																											926	1			917	5			926	VeCad_DAPI_40x8bit_2016_11_07_siYapTaz_2.tif	93			926	Exp3_27217_DAPI_VeCad_Phalloidin_siCTR_3.tif	76
																											927	1			918	1			927	VeCad_DAPI_40x8bit_2016_11_07_siYap_3.tif	95			927	Exp3_27217_DAPI_VeCad_Phalloidin_siYapTaz_3.tif	24
																											928	3			919	1			928	VeCad_DAPI_40x8bit_2016_11_07_siCTR_4.tif	56			928	Exp3_27217_DAPI_VeCad_Phalloidin_siYapTaz_4.tif	70
																											929	0			920	0			929	VeCad_DAPI_40x8bit_2016_11_07_siTaz_2.tif	60			929	Exp3_27217_DAPI_VeCad_Phalloidin_siCTR_5.tif	53
																											930	5			921	2			930	VeCad_DAPI_40x8bit_2016_11_07_siYapTaz_4.tif	88			930	Exp2_13317_DAPI_VeCad_Phalloidin_siYap_3.tif	34
																											931	3			922	2			931	VeCad_DAPI_40x8bit_2016_11_07_siYapTaz_1.tif	15			931	Exp2_13317_DAPI_VeCad_Phalloidin_siCTR_4.tif	44
																											932	4			923	5			932	VeCad_DAPI_40x8bit_2016_11_07_siCTR_3.tif	90			932	Exp3_27217_DAPI_VeCad_Phalloidin_siYap_3.tif	49
																											933	1			924	2			933	VeCad_DAPI_40x8bit_2016_11_07_siYapTaz_4.tif	93			933	Exp2_13317_DAPI_VeCad_Phalloidin_siYap_2.tif	22
																											934	2			925	5			934	VeCad_DAPI_40x8bit_2016_11_07_siCTR_2.tif	68			934	Exp3_27217_DAPI_VeCad_Phalloidin_siYapTaz_3.tif	13
																											935	0			926	0			935	VeCad_DAPI_40x8bit_2016_11_07_siCTR_3.tif	85			935	Exp2_13317_DAPI_VeCad_Phalloidin_siYapTaz_3.tif	15
																											936	0			927	1			936	VeCad_DAPI_40x8bit_2016_11_07_siYap_5.tif	39			936	Exp3_27217_DAPI_VeCad_Phalloidin_siCTR_2.tif	72
																											937	2			928	1			937	VeCad_DAPI_40x8bit_2016_11_07_siYap_2.tif	50			937	Exp3_27217_DAPI_VeCad_Phalloidin_siYap_2.tif	14
																											938	5			929	3			938	VeCad_DAPI_40x8bit_2016_11_07_siTaz_4.tif	52			938	Exp3_27217_DAPI_VeCad_Phalloidin_siCTR_5.tif	34
																											939	2			930	0			939	VeCad_DAPI_40x8bit_2016_11_07_siTaz_5.tif	53			939	Exp3_27217_DAPI_VeCad_Phalloidin_siYapTaz_1.tif	27
																											940	1			931	2			940	VeCad_DAPI_40x8bit_2016_11_07_siYap_2.tif	23			940	Exp2_13317_DAPI_VeCad_Phalloidin_siYapTaz_1.tif	72
																											941	2			932	2			941	VeCad_DAPI_40x8bit_2016_11_07_siYapTaz_5.tif	55			941	Exp3_27217_DAPI_VeCad_Phalloidin_siYapTaz_1.tif	64
																											942	2			933	0			942	VeCad_DAPI_40x8bit_2016_11_07_siCTR_3.tif	75			942	Exp3_27217_DAPI_VeCad_Phalloidin_siYap_3.tif	14
																											943	0			934	0			943	VeCad_DAPI_40x8bit_2016_11_07_siTaz_1.tif	99			943	Exp3_27217_DAPI_VeCad_Phalloidin_siYap_4.tif	20
																											944	3			935	5			944	VeCad_DAPI_40x8bit_2016_11_07_siCTR_1.tif	44			944	Exp2_13317_DAPI_VeCad_Phalloidin_siCTR_3.tif	39
																											945	0			936	3			945	VeCad_DAPI_40x8bit_2016_11_07_siYapTaz_4.tif	37			945	Exp2_13317_DAPI_VeCad_Phalloidin_siYapTaz_1.tif	38
																											946	1			937	0			946	VeCad_DAPI_40x8bit_2016_11_07_siYapTaz_4.tif	67			946	Exp2_13317_DAPI_VeCad_Phalloidin_siYapTaz_3.tif	22
																											947	4			938	0			947	VeCad_DAPI_40x8bit_2016_11_07_siTaz_4.tif	79			947	Exp2_13317_DAPI_VeCad_Phalloidin_siTaz_2.tif	15
																											948	0			939	5			948	VeCad_DAPI_40x8bit_2016_11_07_siYap_1.tif	29			948	Exp3_27217_DAPI_VeCad_Phalloidin_siCTR_5.tif	94
																											949	0			940	3			949	VeCad_DAPI_40x8bit_2016_11_07_siTaz_2.tif	98			949	Exp2_13317_DAPI_VeCad_Phalloidin_siYapTaz_5.tif	20
																											950	2			941	1			950	VeCad_DAPI_40x8bit_2016_11_07_siYap_1.tif	81			950	Exp2_13317_DAPI_VeCad_Phalloidin_siTaz_1.tif	59
																											951	3			942	2			951	VeCad_DAPI_40x8bit_2016_11_07_siCTR_2.tif	96			951	Exp3_27217_DAPI_VeCad_Phalloidin_siYapTaz_4.tif	41
																											952	2			943	1			952	VeCad_DAPI_40x8bit_2016_11_07_siTaz_3.tif	67			952	Exp2_13317_DAPI_VeCad_Phalloidin_siCTR_2.tif	27
																											953	5			944	4			953	VeCad_DAPI_40x8bit_2016_11_07_siTaz_5.tif	46			953	Exp3_27217_DAPI_VeCad_Phalloidin_siYapTaz_5.tif	93
																											954	1			945	5			954	VeCad_DAPI_40x8bit_2016_11_07_siYap_5.tif	26			954	Exp3_27217_DAPI_VeCad_Phalloidin_siCTR_5.tif	33
																											955	0			946	5			955	VeCad_DAPI_40x8bit_2016_11_07_siYap_1.tif	83			955	Exp2_13317_DAPI_VeCad_Phalloidin_siYap_5.tif	14
																											956	1			947	5			956	VeCad_DAPI_40x8bit_2016_11_07_siYapTaz_4.tif	78			956	Exp2_13317_DAPI_VeCad_Phalloidin_siYap_3.tif	52
																											957	0			948	5			957	VeCad_DAPI_40x8bit_2016_11_07_siCTR_1.tif	3			957	Exp2_13317_DAPI_VeCad_Phalloidin_siCTR_4.tif	74
																											958	5			949	1			958	VeCad_DAPI_40x8bit_2016_11_07_siYapTaz_4.tif	38			958	Exp3_27217_DAPI_VeCad_Phalloidin_siYapTaz_4.tif	21
																											959	0			950	3			959	VeCad_DAPI_40x8bit_2016_11_07_siTaz_2.tif	72			959	Exp2_13317_DAPI_VeCad_Phalloidin_siCTR_4.tif	80
																											960	0			951	5			960	VeCad_DAPI_40x8bit_2016_11_07_siYap_3.tif	87			960	Exp2_13317_DAPI_VeCad_Phalloidin_siYapTaz_4.tif	4
																											961	5			952	5			961	VeCad_DAPI_40x8bit_2016_11_07_siTaz_5.tif	57			961	Exp3_27217_DAPI_VeCad_Phalloidin_siYap_3.tif	2
																											962	5			953	0			962	VeCad_DAPI_40x8bit_2016_11_07_siYapTaz_1.tif	16			962	Exp2_13317_DAPI_VeCad_Phalloidin_siTaz_4.tif	39
																											963	5			954	2			963	VeCad_DAPI_40x8bit_2016_11_07_siYapTaz_4.tif	95			963	Exp2_13317_DAPI_VeCad_Phalloidin_siYap_2.tif	42
																											964	0			955	5			964	VeCad_DAPI_40x8bit_2016_11_07_siYapTaz_3.tif	23			964	Exp3_27217_DAPI_VeCad_Phalloidin_siCTR_2.tif	82
																											965	0			956	1			965	VeCad_DAPI_40x8bit_2016_11_07_siYap_5.tif	80			965	Exp3_27217_DAPI_VeCad_Phalloidin_siYapTaz_5.tif	23
																											966	0			957	2			966	VeCad_DAPI_40x8bit_2016_11_07_siYap_1.tif	63			966	Exp3_27217_DAPI_VeCad_Phalloidin_siYap_3.tif	44
																											967	2			958	1			967	VeCad_DAPI_40x8bit_2016_11_07_siCTR_2.tif	59			967	Exp3_27217_DAPI_VeCad_Phalloidin_siYapTaz_2.tif	63
																											968	0			959	2			968	VeCad_DAPI_40x8bit_2016_11_07_siYapTaz_2.tif	48			968	Exp2_13317_DAPI_VeCad_Phalloidin_siYapTaz_5.tif	78
																											969	1			960	1			969	VeCad_DAPI_40x8bit_2016_11_07_siYap_2.tif	63			969	Exp2_13317_DAPI_VeCad_Phalloidin_siTaz_1.tif	5
																											970	2			961	2			970	VeCad_DAPI_40x8bit_2016_11_07_siCTR_5.tif	36			970	Exp3_27217_DAPI_VeCad_Phalloidin_siCTR_2.tif	34
																											971	2			962	1			971	VeCad_DAPI_40x8bit_2016_11_07_siYap_5.tif	69			971	Exp2_13317_DAPI_VeCad_Phalloidin_siCTR_1.tif	93
																											972	1			963	1			972	VeCad_DAPI_40x8bit_2016_11_07_siYapTaz_5.tif	37			972	Exp2_13317_DAPI_VeCad_Phalloidin_siYapTaz_1.tif	25
																											973	1			964	4			973	VeCad_DAPI_40x8bit_2016_11_07_siYap_5.tif	90			973	Exp2_13317_DAPI_VeCad_Phalloidin_siTaz_1.tif	31
																											974	1			965	0			974	VeCad_DAPI_40x8bit_2016_11_07_siCTR_2.tif	31			974	Exp3_27217_DAPI_VeCad_Phalloidin_siYap_3.tif	79
																											975	4			966	2			975	VeCad_DAPI_40x8bit_2016_11_07_siCTR_3.tif	22			975	Exp2_13317_DAPI_VeCad_Phalloidin_siTaz_1.tif	2
																											976	0			967	0			976	VeCad_DAPI_40x8bit_2016_11_07_siTaz_5.tif	17			976	Exp2_13317_DAPI_VeCad_Phalloidin_siCTR_5.tif	75
																											977	1			968	0			977	VeCad_DAPI_40x8bit_2016_11_07_siYapTaz_1.tif	5			977	Exp3_27217_DAPI_VeCad_Phalloidin_siCTR_2.tif	4
																											978	4			969	2			978	VeCad_DAPI_40x8bit_2016_11_07_siCTR_5.tif	65			978	Exp3_27217_DAPI_VeCad_Phalloidin_siYap_4.tif	54
																											979	3			970	3			979	VeCad_DAPI_40x8bit_2016_11_07_siCTR_1.tif	43			979	Exp3_27217_DAPI_VeCad_Phalloidin_siCTR_1.tif	40
																											980	1	2		971	3			980	VeCad_DAPI_40x8bit_2016_11_07_siCTR_1.tif	21			980	Exp2_13317_DAPI_VeCad_Phalloidin_siYapTaz_4.tif	81
																											981	4			972	1			981	VeCad_DAPI_40x8bit_2016_11_07_siCTR_5.tif	45			981	Exp2_13317_DAPI_VeCad_Phalloidin_siYapTaz_4.tif	39
																											982	0			973	3			982	VeCad_DAPI_40x8bit_2016_11_07_siCTR_2.tif	12			982	Exp3_27217_DAPI_VeCad_Phalloidin_siYap_2.tif	9
																											983	1			974	1			983	VeCad_DAPI_40x8bit_2016_11_07_siYapTaz_2.tif	55			983	Exp2_13317_DAPI_VeCad_Phalloidin_siYap_1.tif	69
																											984	3			975	2			984	VeCad_DAPI_40x8bit_2016_11_07_siCTR_5.tif	0			984	Exp3_27217_DAPI_VeCad_Phalloidin_siYapTaz_1.tif	70
																											985	4			976	1			985	VeCad_DAPI_40x8bit_2016_11_07_siCTR_2.tif	42			985	Exp2_13317_DAPI_VeCad_Phalloidin_siCTR_2.tif	6
																											986	0			977	2			986	VeCad_DAPI_40x8bit_2016_11_07_siTaz_3.tif	49			986	Exp3_27217_DAPI_VeCad_Phalloidin_siCTR_4.tif	16
																											987	0			978	0			987	VeCad_DAPI_40x8bit_2016_11_07_siYap_1.tif	0			987	Exp3_27217_DAPI_VeCad_Phalloidin_siCTR_1.tif	13
																											988	2			979	2			988	VeCad_DAPI_40x8bit_2016_11_07_siYap_3.tif	44			988	Exp3_27217_DAPI_VeCad_Phalloidin_siYapTaz_1.tif	39
																											989	0			980	0			989	VeCad_DAPI_40x8bit_2016_11_07_siTaz_1.tif	73			989	Exp3_27217_DAPI_VeCad_Phalloidin_siYapTaz_1.tif	8
																											990	0			981	2			990	VeCad_DAPI_40x8bit_2016_11_07_siYap_4.tif	13			990	Exp3_27217_DAPI_VeCad_Phalloidin_siYapTaz_2.tif	2
																											991	4			982	0			991	VeCad_DAPI_40x8bit_2016_11_07_siCTR_2.tif	35			991	Exp2_13317_DAPI_VeCad_Phalloidin_siTaz_1.tif	75
																											992	2			983	0			992	VeCad_DAPI_40x8bit_2016_11_07_siYapTaz_3.tif	58			992	Exp2_13317_DAPI_VeCad_Phalloidin_siCTR_2.tif	58
																											993	2			984	3			993	VeCad_DAPI_40x8bit_2016_11_07_siCTR_4.tif	67			993	Exp2_13317_DAPI_VeCad_Phalloidin_siYapTaz_5.tif	52
																											994	2			985	3			994	VeCad_DAPI_40x8bit_2016_11_07_siYap_5.tif	48			994	Exp2_13317_DAPI_VeCad_Phalloidin_siTaz_4.tif	30
																											995	3			986	0			995	VeCad_DAPI_40x8bit_2016_11_07_siCTR_4.tif	21			995	Exp3_27217_DAPI_VeCad_Phalloidin_siYapTaz_4.tif	92
																											996	0			987	0			996	VeCad_DAPI_40x8bit_2016_11_07_siTaz_5.tif	66			996	Exp2_13317_DAPI_VeCad_Phalloidin_siCTR_2.tif	29
																											997	1			988	5			997	VeCad_DAPI_40x8bit_2016_11_07_siYapTaz_1.tif	95			997	Exp2_13317_DAPI_VeCad_Phalloidin_siYapTaz_2.tif	37
																											998	0			989	0			998	VeCad_DAPI_40x8bit_2016_11_07_siYapTaz_5.tif	12			998	Exp3_27217_DAPI_VeCad_Phalloidin_siCTR_2.tif	33
																											999	3			990	0			999	VeCad_DAPI_40x8bit_2016_11_07_siCTR_2.tif	79			999	Exp2_13317_DAPI_VeCad_Phalloidin_siYapTaz_4.tif	7
																											1000	1			991	0			1000	VeCad_DAPI_40x8bit_2016_11_07_siCTR_3.tif	10			1000	Exp2_13317_DAPI_VeCad_Phalloidin_siCTR_1.tif	88
																															992	2			1001	VeCad_DAPI_40x8bit_2016_11_07_siTaz_5.tif	71			1001	Exp3_27217_DAPI_VeCad_Phalloidin_siYapTaz_2.tif	26
																															993	0			1002	VeCad_DAPI_40x8bit_2016_11_07_siYap_4.tif	1			1002	Exp2_13317_DAPI_VeCad_Phalloidin_siTaz_3.tif	11
																															994	3			1003	VeCad_DAPI_40x8bit_2016_11_07_siCTR_1.tif	0			1003	Exp2_13317_DAPI_VeCad_Phalloidin_siCTR_1.tif	58
																															995	1			1004	VeCad_DAPI_40x8bit_2016_11_07_siTaz_2.tif	83			1004	Exp2_13317_DAPI_VeCad_Phalloidin_siCTR_4.tif	83
																															996	5			1005	VeCad_DAPI_40x8bit_2016_11_07_siTaz_5.tif	6			1005	Exp2_13317_DAPI_VeCad_Phalloidin_siCTR_3.tif	83
																															997	1			1006	VeCad_DAPI_40x8bit_2016_11_07_siTaz_3.tif	29			1006	Exp3_27217_DAPI_VeCad_Phalloidin_siYapTaz_1.tif	12
																															998	2			1007	VeCad_DAPI_40x8bit_2016_11_07_siTaz_4.tif	43			1007	Exp2_13317_DAPI_VeCad_Phalloidin_siTaz_2.tif	52
																															999	0			1008	VeCad_DAPI_40x8bit_2016_11_07_siYapTaz_1.tif	54			1008	Exp2_13317_DAPI_VeCad_Phalloidin_siCTR_2.tif	10
																															1000	0			1009	VeCad_DAPI_40x8bit_2016_11_07_siYap_1.tif	6			1009	Exp2_13317_DAPI_VeCad_Phalloidin_siYap_1.tif	15
																															1001	0			1010	VeCad_DAPI_40x8bit_2016_11_07_siTaz_4.tif	83			1010	Exp2_13317_DAPI_VeCad_Phalloidin_siCTR_5.tif	88
																															1002	3			1011	VeCad_DAPI_40x8bit_2016_11_07_siTaz_2.tif	52			1011	Exp2_13317_DAPI_VeCad_Phalloidin_siTaz_2.tif	51
																															1003	1			1012	VeCad_DAPI_40x8bit_2016_11_07_siYapTaz_2.tif	67			1012	Exp2_13317_DAPI_VeCad_Phalloidin_siYapTaz_2.tif	54
																															1004	3			1013	VeCad_DAPI_40x8bit_2016_11_07_siYap_1.tif	79			1013	Exp3_27217_DAPI_VeCad_Phalloidin_siYapTaz_3.tif	91
																															1005	4			1014	VeCad_DAPI_40x8bit_2016_11_07_siYap_1.tif	1			1014	Exp2_13317_DAPI_VeCad_Phalloidin_siYap_2.tif	8
																															1006	5			1015	VeCad_DAPI_40x8bit_2016_11_07_siYap_1.tif	30			1015	Exp3_27217_DAPI_VeCad_Phalloidin_siYapTaz_4.tif	49
																															1007	4			1016	VeCad_DAPI_40x8bit_2016_11_07_siCTR_3.tif	39			1016	Exp3_27217_DAPI_VeCad_Phalloidin_siYapTaz_2.tif	34
																															1008	3			1017	VeCad_DAPI_40x8bit_2016_11_07_siYap_4.tif	10			1017	Exp2_13317_DAPI_VeCad_Phalloidin_siYapTaz_2.tif	46
																															1009	0			1018	VeCad_DAPI_40x8bit_2016_11_07_siCTR_4.tif	35			1018	Exp3_27217_DAPI_VeCad_Phalloidin_siCTR_2.tif	49
																															1010	4			1019	VeCad_DAPI_40x8bit_2016_11_07_siYap_1.tif	17			1019	Exp2_13317_DAPI_VeCad_Phalloidin_siYap_3.tif	90
																															1011	0			1020	VeCad_DAPI_40x8bit_2016_11_07_siCTR_5.tif	47			1020	Exp3_27217_DAPI_VeCad_Phalloidin_siCTR_5.tif	0
																															1012	5			1021	VeCad_DAPI_40x8bit_2016_11_07_siCTR_1.tif	36			1021	Exp2_13317_DAPI_VeCad_Phalloidin_siTaz_1.tif	30
																															1013	1			1022	VeCad_DAPI_40x8bit_2016_11_07_siYapTaz_1.tif	22			1022	Exp2_13317_DAPI_VeCad_Phalloidin_siTaz_1.tif	95
																															1014	1			1023	VeCad_DAPI_40x8bit_2016_11_07_siYap_4.tif	6			1023	Exp3_27217_DAPI_VeCad_Phalloidin_siYap_1.tif	11
																															1015	0			1024	VeCad_DAPI_40x8bit_2016_11_07_siYap_1.tif	43			1024	Exp3_27217_DAPI_VeCad_Phalloidin_siYap_3.tif	27
																															1016	2			1025	VeCad_DAPI_40x8bit_2016_11_07_siYap_1.tif	88			1025	Exp3_27217_DAPI_VeCad_Phalloidin_siYap_5.tif	97
																															1017	5			1026	VeCad_DAPI_40x8bit_2016_11_07_siCTR_3.tif	94			1026	Exp2_13317_DAPI_VeCad_Phalloidin_siCTR_5.tif	74
																															1018	5			1027	VeCad_DAPI_40x8bit_2016_11_07_siCTR_5.tif	71			1027	Exp2_13317_DAPI_VeCad_Phalloidin_siYapTaz_3.tif	16
																															1019	0			1028	VeCad_DAPI_40x8bit_2016_11_07_siTaz_4.tif	28			1028	Exp3_27217_DAPI_VeCad_Phalloidin_siYap_4.tif	6
																															1020	0			1029	VeCad_DAPI_40x8bit_2016_11_07_siYap_5.tif	32			1029	Exp3_27217_DAPI_VeCad_Phalloidin_siYapTaz_5.tif	45
																															1021	0			1030	VeCad_DAPI_40x8bit_2016_11_07_siCTR_3.tif	15			1030	Exp2_13317_DAPI_VeCad_Phalloidin_siTaz_3.tif	67
																															1022	2			1031	VeCad_DAPI_40x8bit_2016_11_07_siYapTaz_2.tif	5			1031	Exp3_27217_DAPI_VeCad_Phalloidin_siYap_1.tif	76
																															1023	0			1032	VeCad_DAPI_40x8bit_2016_11_07_siYapTaz_5.tif	61			1032	Exp3_27217_DAPI_VeCad_Phalloidin_siYapTaz_2.tif	66
																															1024	1			1033	VeCad_DAPI_40x8bit_2016_11_07_siYapTaz_4.tif	21			1033	Exp3_27217_DAPI_VeCad_Phalloidin_siYap_4.tif	7
																															1025	2			1034	VeCad_DAPI_40x8bit_2016_11_07_siCTR_2.tif	38			1034	Exp2_13317_DAPI_VeCad_Phalloidin_siYapTaz_5.tif	77
																															1026	4			1035	VeCad_DAPI_40x8bit_2016_11_07_siYap_1.tif	58			1035	Exp3_27217_DAPI_VeCad_Phalloidin_siCTR_3.tif	45
																															1027	0			1036	VeCad_DAPI_40x8bit_2016_11_07_siTaz_4.tif	87			1036	Exp2_13317_DAPI_VeCad_Phalloidin_siCTR_3.tif	23
																															1028	1			1037	VeCad_DAPI_40x8bit_2016_11_07_siYap_5.tif	2			1037	Exp3_27217_DAPI_VeCad_Phalloidin_siYapTaz_1.tif	7
																															1029	0			1038	VeCad_DAPI_40x8bit_2016_11_07_siYapTaz_2.tif	88			1038	Exp2_13317_DAPI_VeCad_Phalloidin_siYap_4.tif	67
																															1030	0			1039	VeCad_DAPI_40x8bit_2016_11_07_siTaz_5.tif	54			1039	Exp3_27217_DAPI_VeCad_Phalloidin_siYapTaz_4.tif	47
																															1031	1			1040	VeCad_DAPI_40x8bit_2016_11_07_siCTR_2.tif	64			1040	Exp3_27217_DAPI_VeCad_Phalloidin_siCTR_3.tif	96
																															1032	0			1041	VeCad_DAPI_40x8bit_2016_11_07_siCTR_2.tif	92			1041	Exp3_27217_DAPI_VeCad_Phalloidin_siCTR_2.tif	20
																															1033	1			1042	VeCad_DAPI_40x8bit_2016_11_07_siYap_2.tif	20			1042	Exp2_13317_DAPI_VeCad_Phalloidin_siYap_5.tif	13
																															1034	5			1043	VeCad_DAPI_40x8bit_2016_11_07_siYapTaz_1.tif	9			1043	Exp3_27217_DAPI_VeCad_Phalloidin_siYap_5.tif	37
																															1035	0			1044	VeCad_DAPI_40x8bit_2016_11_07_siYap_3.tif	30			1044	Exp2_13317_DAPI_VeCad_Phalloidin_siCTR_1.tif	2
																															1036	5			1045	VeCad_DAPI_40x8bit_2016_11_07_siYap_1.tif	64			1045	Exp2_13317_DAPI_VeCad_Phalloidin_siTaz_5.tif	75
																															1037	0			1046	VeCad_DAPI_40x8bit_2016_11_07_siYap_3.tif	65			1046	Exp2_13317_DAPI_VeCad_Phalloidin_siYapTaz_4.tif	99
																															1038	1			1047	VeCad_DAPI_40x8bit_2016_11_07_siYapTaz_5.tif	71			1047	Exp2_13317_DAPI_VeCad_Phalloidin_siYap_3.tif	83
																															1039	0			1048	VeCad_DAPI_40x8bit_2016_11_07_siYapTaz_5.tif	39			1048	Exp2_13317_DAPI_VeCad_Phalloidin_siTaz_2.tif	39
																															1040	4			1049	VeCad_DAPI_40x8bit_2016_11_07_siTaz_5.tif	32			1049	Exp2_13317_DAPI_VeCad_Phalloidin_siTaz_5.tif	99
																															1041	2			1050	VeCad_DAPI_40x8bit_2016_11_07_siYapTaz_4.tif	40			1050	Exp2_13317_DAPI_VeCad_Phalloidin_siCTR_1.tif	29
																															1042	1			1051	VeCad_DAPI_40x8bit_2016_11_07_siYap_3.tif	25			1051	Exp3_27217_DAPI_VeCad_Phalloidin_siCTR_5.tif	36
																															1043	1			1052	VeCad_DAPI_40x8bit_2016_11_07_siTaz_3.tif	53			1052	Exp3_27217_DAPI_VeCad_Phalloidin_siYapTaz_2.tif	67
																															1044	4			1053	VeCad_DAPI_40x8bit_2016_11_07_siTaz_1.tif	3			1053	Exp2_13317_DAPI_VeCad_Phalloidin_siCTR_1.tif	87
																															1045	0			1054	VeCad_DAPI_40x8bit_2016_11_07_siCTR_1.tif	92			1054	Exp2_13317_DAPI_VeCad_Phalloidin_siYap_1.tif	73
																															1046	4			1055	VeCad_DAPI_40x8bit_2016_11_07_siCTR_2.tif	62			1055	Exp3_27217_DAPI_VeCad_Phalloidin_siYap_5.tif	76
																															1047	1			1056	VeCad_DAPI_40x8bit_2016_11_07_siYap_5.tif	3			1056	Exp2_13317_DAPI_VeCad_Phalloidin_siCTR_3.tif	57
																															1048	5			1057	VeCad_DAPI_40x8bit_2016_11_07_siYap_2.tif	71			1057	Exp2_13317_DAPI_VeCad_Phalloidin_siCTR_2.tif	90
																															1049	5			1058	VeCad_DAPI_40x8bit_2016_11_07_siTaz_4.tif	3			1058	Exp2_13317_DAPI_VeCad_Phalloidin_siCTR_5.tif	49
																															1050	2			1059	VeCad_DAPI_40x8bit_2016_11_07_siYapTaz_4.tif	30			1059	Exp3_27217_DAPI_VeCad_Phalloidin_siCTR_5.tif	64
																															1051	5			1060	VeCad_DAPI_40x8bit_2016_11_07_siTaz_3.tif	17			1060	Exp2_13317_DAPI_VeCad_Phalloidin_siYap_3.tif	23
																															1052	0			1061	VeCad_DAPI_40x8bit_2016_11_07_siTaz_4.tif	39			1061	Exp3_27217_DAPI_VeCad_Phalloidin_siYap_4.tif	31
																															1053	4			1062	VeCad_DAPI_40x8bit_2016_11_07_siYapTaz_1.tif	72			1062	Exp3_27217_DAPI_VeCad_Phalloidin_siYap_4.tif	80
																															1054	1			1063	VeCad_DAPI_40x8bit_2016_11_07_siYapTaz_2.tif	45			1063	Exp2_13317_DAPI_VeCad_Phalloidin_siYapTaz_4.tif	16
																															1055	1			1064	VeCad_DAPI_40x8bit_2016_11_07_siYap_3.tif	59			1064	Exp3_27217_DAPI_VeCad_Phalloidin_siYap_3.tif	0
																															1056	2			1065	VeCad_DAPI_40x8bit_2016_11_07_siYapTaz_1.tif	94			1065	Exp3_27217_DAPI_VeCad_Phalloidin_siYap_1.tif	78
																															1057	2			1066	VeCad_DAPI_40x8bit_2016_11_07_siYap_2.tif	87			1066	Exp2_13317_DAPI_VeCad_Phalloidin_siYap_2.tif	63
																															1058	0			1067	VeCad_DAPI_40x8bit_2016_11_07_siTaz_1.tif	44			1067	Exp2_13317_DAPI_VeCad_Phalloidin_siCTR_3.tif	49
																															1059	0			1068	VeCad_DAPI_40x8bit_2016_11_07_siCTR_2.tif	88			1068	Exp2_13317_DAPI_VeCad_Phalloidin_siYapTaz_5.tif	0
																															1060	1			1069	VeCad_DAPI_40x8bit_2016_11_07_siYapTaz_2.tif	94			1069	Exp2_13317_DAPI_VeCad_Phalloidin_siTaz_1.tif	84
																															1061	2			1070	VeCad_DAPI_40x8bit_2016_11_07_siTaz_2.tif	66			1070	Exp2_13317_DAPI_VeCad_Phalloidin_siYap_5.tif	65
																															1062	0			1071	VeCad_DAPI_40x8bit_2016_11_07_siYapTaz_4.tif	43			1071	Exp2_13317_DAPI_VeCad_Phalloidin_siYapTaz_4.tif	46
																															1063	0			1072	VeCad_DAPI_40x8bit_2016_11_07_siTaz_5.tif	50			1072	Exp3_27217_DAPI_VeCad_Phalloidin_siCTR_1.tif	78
																															1064	0			1073	VeCad_DAPI_40x8bit_2016_11_07_siYapTaz_4.tif	36			1073	Exp3_27217_DAPI_VeCad_Phalloidin_siYap_5.tif	87
																															1065	0			1074	VeCad_DAPI_40x8bit_2016_11_07_siYap_4.tif	73			1074	Exp2_13317_DAPI_VeCad_Phalloidin_siTaz_5.tif	93
																															1066	1			1075	VeCad_DAPI_40x8bit_2016_11_07_siCTR_3.tif	89			1075	Exp3_27217_DAPI_VeCad_Phalloidin_siYapTaz_4.tif	93
																															1067	5	3		1076	VeCad_DAPI_40x8bit_2016_11_07_siYap_1.tif	32			1076	Exp3_27217_DAPI_VeCad_Phalloidin_siYapTaz_5.tif	81
																															1068	1			1077	VeCad_DAPI_40x8bit_2016_11_07_siYapTaz_1.tif	88			1077	Exp2_13317_DAPI_VeCad_Phalloidin_siYapTaz_4.tif	34
																															1069	0			1078	VeCad_DAPI_40x8bit_2016_11_07_siTaz_4.tif	10			1078	Exp2_13317_DAPI_VeCad_Phalloidin_siCTR_3.tif	3
																															1070	1			1079	VeCad_DAPI_40x8bit_2016_11_07_siYapTaz_3.tif	48			1079	Exp2_13317_DAPI_VeCad_Phalloidin_siTaz_2.tif	98
																															1071	0			1080	VeCad_DAPI_40x8bit_2016_11_07_siTaz_3.tif	62			1080	Exp2_13317_DAPI_VeCad_Phalloidin_siYap_2.tif	66
																															1072	2			1081	VeCad_DAPI_40x8bit_2016_11_07_siYap_5.tif	51			1081	Exp3_27217_DAPI_VeCad_Phalloidin_siCTR_3.tif	2
																															1073	1			1082	VeCad_DAPI_40x8bit_2016_11_07_siYap_5.tif	31			1082	Exp2_13317_DAPI_VeCad_Phalloidin_siYapTaz_4.tif	71
																															1074	3			1083	VeCad_DAPI_40x8bit_2016_11_07_siYapTaz_1.tif	37			1083	Exp2_13317_DAPI_VeCad_Phalloidin_siTaz_4.tif	75
																															1075	0			1084	VeCad_DAPI_40x8bit_2016_11_07_siTaz_4.tif	78			1084	Exp2_13317_DAPI_VeCad_Phalloidin_siCTR_1.tif	96
																															1076	1			1085	VeCad_DAPI_40x8bit_2016_11_07_siYap_5.tif	29			1085	Exp3_27217_DAPI_VeCad_Phalloidin_siYap_2.tif	60
																															1077	0			1086	VeCad_DAPI_40x8bit_2016_11_07_siYap_5.tif	62			1086	Exp2_13317_DAPI_VeCad_Phalloidin_siYapTaz_4.tif	94
																															1078	2			1087	VeCad_DAPI_40x8bit_2016_11_07_siYap_3.tif	34			1087	Exp3_27217_DAPI_VeCad_Phalloidin_siYapTaz_4.tif	38
																															1079	5			1088	VeCad_DAPI_40x8bit_2016_11_07_siTaz_4.tif	29			1088	Exp3_27217_DAPI_VeCad_Phalloidin_siYapTaz_1.tif	52
																															1080	0			1089	VeCad_DAPI_40x8bit_2016_11_07_siTaz_3.tif	3			1089	Exp2_13317_DAPI_VeCad_Phalloidin_siCTR_1.tif	25
																															1081	0			1090	VeCad_DAPI_40x8bit_2016_11_07_siYapTaz_3.tif	77			1090	Exp2_13317_DAPI_VeCad_Phalloidin_siCTR_2.tif	86
																															1082	2			1091	VeCad_DAPI_40x8bit_2016_11_07_siYap_3.tif	41			1091	Exp2_13317_DAPI_VeCad_Phalloidin_siTaz_1.tif	34
																															1083	0			1092	VeCad_DAPI_40x8bit_2016_11_07_siYap_5.tif	33			1092	Exp3_27217_DAPI_VeCad_Phalloidin_siCTR_1.tif	36
																															1084	1			1093	VeCad_DAPI_40x8bit_2016_11_07_siYap_4.tif	67			1093	Exp3_27217_DAPI_VeCad_Phalloidin_siCTR_2.tif	58
																															1085	0			1094	VeCad_DAPI_40x8bit_2016_11_07_siCTR_4.tif	46			1094	Exp3_27217_DAPI_VeCad_Phalloidin_siCTR_2.tif	90
																															1086	2			1095	VeCad_DAPI_40x8bit_2016_11_07_siCTR_4.tif	41			1095	Exp2_13317_DAPI_VeCad_Phalloidin_siYapTaz_1.tif	86
																															1087	1			1096	VeCad_DAPI_40x8bit_2016_11_07_siYap_1.tif	11			1096	Exp3_27217_DAPI_VeCad_Phalloidin_siYapTaz_4.tif	34
																															1088	0			1097	VeCad_DAPI_40x8bit_2016_11_07_siTaz_3.tif	68			1097	Exp3_27217_DAPI_VeCad_Phalloidin_siYap_3.tif	60
																															1089	3			1098	VeCad_DAPI_40x8bit_2016_11_07_siCTR_4.tif	54			1098	Exp3_27217_DAPI_VeCad_Phalloidin_siCTR_5.tif	27
																															1090	2			1099	VeCad_DAPI_40x8bit_2016_11_07_siYapTaz_5.tif	41			1099	Exp3_27217_DAPI_VeCad_Phalloidin_siYapTaz_2.tif	3
																															1091	3			1100	VeCad_DAPI_40x8bit_2016_11_07_siTaz_1.tif	48			1100	Exp3_27217_DAPI_VeCad_Phalloidin_siYap_1.tif	23
																															1092	3	5		1101	VeCad_DAPI_40x8bit_2016_11_07_siTaz_2.tif	54			1101	Exp3_27217_DAPI_VeCad_Phalloidin_siYap_4.tif	78
																															1093	1			1102	VeCad_DAPI_40x8bit_2016_11_07_siTaz_2.tif	17			1102	Exp2_13317_DAPI_VeCad_Phalloidin_siTaz_5.tif	11
																															1094	1			1103	VeCad_DAPI_40x8bit_2016_11_07_siYap_1.tif	86			1103	Exp2_13317_DAPI_VeCad_Phalloidin_siYapTaz_1.tif	33
																															1095	5			1104	VeCad_DAPI_40x8bit_2016_11_07_siYapTaz_5.tif	99			1104	Exp3_27217_DAPI_VeCad_Phalloidin_siCTR_2.tif	6
																															1096	1			1105	VeCad_DAPI_40x8bit_2016_11_07_siYapTaz_4.tif	97			1105	Exp3_27217_DAPI_VeCad_Phalloidin_siYapTaz_4.tif	35
																															1097	1			1106	VeCad_DAPI_40x8bit_2016_11_07_siTaz_3.tif	89			1106	Exp3_27217_DAPI_VeCad_Phalloidin_siYapTaz_5.tif	13
																															1098	2			1107	VeCad_DAPI_40x8bit_2016_11_07_siYapTaz_5.tif	82			1107	Exp3_27217_DAPI_VeCad_Phalloidin_siYapTaz_1.tif	17
																															1099	0			1108	VeCad_DAPI_40x8bit_2016_11_07_siYapTaz_2.tif	49			1108	Exp2_13317_DAPI_VeCad_Phalloidin_siCTR_2.tif	2
																															1100	1			1109	VeCad_DAPI_40x8bit_2016_11_07_siTaz_2.tif	20			1109	Exp2_13317_DAPI_VeCad_Phalloidin_siCTR_4.tif	67
																															1101	0			1110	VeCad_DAPI_40x8bit_2016_11_07_siYapTaz_2.tif	30			1110	Exp2_13317_DAPI_VeCad_Phalloidin_siTaz_3.tif	81
																															1102	3			1111	VeCad_DAPI_40x8bit_2016_11_07_siYapTaz_2.tif	13			1111	Exp3_27217_DAPI_VeCad_Phalloidin_siYap_5.tif	24
																															1103	0			1112	VeCad_DAPI_40x8bit_2016_11_07_siYapTaz_3.tif	0			1112	Exp2_13317_DAPI_VeCad_Phalloidin_siYap_5.tif	17
																															1104	1			1113	VeCad_DAPI_40x8bit_2016_11_07_siTaz_5.tif	79			1113	Exp3_27217_DAPI_VeCad_Phalloidin_siYapTaz_5.tif	92
																															1105	1			1114	VeCad_DAPI_40x8bit_2016_11_07_siCTR_5.tif	24			1114	Exp3_27217_DAPI_VeCad_Phalloidin_siYapTaz_2.tif	33
																															1106	1			1115	VeCad_DAPI_40x8bit_2016_11_07_siCTR_2.tif	32			1115	Exp3_27217_DAPI_VeCad_Phalloidin_siYap_5.tif	21
																															1107	5			1116	VeCad_DAPI_40x8bit_2016_11_07_siYapTaz_1.tif	74			1116	Exp3_27217_DAPI_VeCad_Phalloidin_siCTR_3.tif	51
																															1108	0			1117	VeCad_DAPI_40x8bit_2016_11_07_siCTR_4.tif	9			1117	Exp3_27217_DAPI_VeCad_Phalloidin_siCTR_2.tif	51
																															1109	0			1118	VeCad_DAPI_40x8bit_2016_11_07_siYapTaz_1.tif	79			1118	Exp3_27217_DAPI_VeCad_Phalloidin_siCTR_1.tif	69
																															1110	3			1119	VeCad_DAPI_40x8bit_2016_11_07_siYap_2.tif	14			1119	Exp2_13317_DAPI_VeCad_Phalloidin_siCTR_5.tif	54
																															1111	0			1120	VeCad_DAPI_40x8bit_2016_11_07_siYapTaz_1.tif	78			1120	Exp2_13317_DAPI_VeCad_Phalloidin_siTaz_1.tif	87
																															1112	5			1121	VeCad_DAPI_40x8bit_2016_11_07_siYap_1.tif	55			1121	Exp2_13317_DAPI_VeCad_Phalloidin_siYapTaz_5.tif	83
																															1113	0			1122	VeCad_DAPI_40x8bit_2016_11_07_siYap_3.tif	85			1122	Exp3_27217_DAPI_VeCad_Phalloidin_siYap_2.tif	7
																															1114	2			1123	VeCad_DAPI_40x8bit_2016_11_07_siYap_1.tif	78			1123	Exp2_13317_DAPI_VeCad_Phalloidin_siCTR_2.tif	80
																															1115	0			1124	VeCad_DAPI_40x8bit_2016_11_07_siYap_5.tif	27			1124	Exp2_13317_DAPI_VeCad_Phalloidin_siCTR_2.tif	30
																															1116	0			1125	VeCad_DAPI_40x8bit_2016_11_07_siCTR_1.tif	83			1125	Exp3_27217_DAPI_VeCad_Phalloidin_siYap_3.tif	85
																															1117	0			1126	VeCad_DAPI_40x8bit_2016_11_07_siCTR_2.tif	2			1126	Exp2_13317_DAPI_VeCad_Phalloidin_siTaz_3.tif	98
																															1118	4			1127	VeCad_DAPI_40x8bit_2016_11_07_siTaz_1.tif	85			1127	Exp2_13317_DAPI_VeCad_Phalloidin_siYap_1.tif	89
																															1119	3			1128	VeCad_DAPI_40x8bit_2016_11_07_siYap_2.tif	89			1128	Exp3_27217_DAPI_VeCad_Phalloidin_siYap_5.tif	78
																															1120	0			1129	VeCad_DAPI_40x8bit_2016_11_07_siYapTaz_3.tif	21			1129	Exp2_13317_DAPI_VeCad_Phalloidin_siYap_1.tif	54
																															1121	0			1130	VeCad_DAPI_40x8bit_2016_11_07_siTaz_3.tif	25			1130	Exp3_27217_DAPI_VeCad_Phalloidin_siCTR_4.tif	69
																															1122	0			1131	VeCad_DAPI_40x8bit_2016_11_07_siYapTaz_4.tif	73			1131	Exp2_13317_DAPI_VeCad_Phalloidin_siYap_5.tif	92
																															1123	0			1132	VeCad_DAPI_40x8bit_2016_11_07_siYapTaz_5.tif	19			1132	Exp3_27217_DAPI_VeCad_Phalloidin_siYap_4.tif	21
																															1124	3			1133	VeCad_DAPI_40x8bit_2016_11_07_siYap_4.tif	75			1133	Exp3_27217_DAPI_VeCad_Phalloidin_siYapTaz_4.tif	89
																															1125	0			1134	VeCad_DAPI_40x8bit_2016_11_07_siCTR_3.tif	52			1134	Exp3_27217_DAPI_VeCad_Phalloidin_siYapTaz_2.tif	39
																															1126	2			1135	VeCad_DAPI_40x8bit_2016_11_07_siYapTaz_1.tif	73			1135	Exp2_13317_DAPI_VeCad_Phalloidin_siTaz_1.tif	37
																															1127	1			1136	VeCad_DAPI_40x8bit_2016_11_07_siTaz_1.tif	40			1136	Exp2_13317_DAPI_VeCad_Phalloidin_siYap_2.tif	21
																															1128	0			1137	VeCad_DAPI_40x8bit_2016_11_07_siYapTaz_5.tif	66			1137	Exp2_13317_DAPI_VeCad_Phalloidin_siYap_2.tif	45
																															1129	1			1138	VeCad_DAPI_40x8bit_2016_11_07_siYapTaz_5.tif	25			1138	Exp3_27217_DAPI_VeCad_Phalloidin_siYap_5.tif	30
																															1130	1			1139	VeCad_DAPI_40x8bit_2016_11_07_siYap_4.tif	12			1139	Exp3_27217_DAPI_VeCad_Phalloidin_siYapTaz_3.tif	36
																															1131	2			1140	VeCad_DAPI_40x8bit_2016_11_07_siCTR_2.tif	78			1140	Exp2_13317_DAPI_VeCad_Phalloidin_siYapTaz_2.tif	86
																															1132	2			1141	VeCad_DAPI_40x8bit_2016_11_07_siTaz_5.tif	5			1141	Exp3_27217_DAPI_VeCad_Phalloidin_siCTR_5.tif	83
																															1133	1			1142	VeCad_DAPI_40x8bit_2016_11_07_siYapTaz_2.tif	27			1142	Exp2_13317_DAPI_VeCad_Phalloidin_siCTR_2.tif	85
																															1134	0			1143	VeCad_DAPI_40x8bit_2016_11_07_siTaz_4.tif	18			1143	Exp3_27217_DAPI_VeCad_Phalloidin_siCTR_2.tif	27
																															1135	1			1144	VeCad_DAPI_40x8bit_2016_11_07_siTaz_3.tif	30			1144	Exp3_27217_DAPI_VeCad_Phalloidin_siCTR_5.tif	60
																															1136	1			1145	VeCad_DAPI_40x8bit_2016_11_07_siTaz_1.tif	61			1145	Exp3_27217_DAPI_VeCad_Phalloidin_siYap_3.tif	81
																															1137	1			1146	VeCad_DAPI_40x8bit_2016_11_07_siTaz_2.tif	78			1146	Exp3_27217_DAPI_VeCad_Phalloidin_siYap_4.tif	44
																															1138	1			1147	VeCad_DAPI_40x8bit_2016_11_07_siCTR_1.tif	26			1147	Exp3_27217_DAPI_VeCad_Phalloidin_siYap_3.tif	72
																															1139	0			1148	VeCad_DAPI_40x8bit_2016_11_07_siCTR_5.tif	79			1148	Exp3_27217_DAPI_VeCad_Phalloidin_siYapTaz_4.tif	85
																															1140	5			1149	VeCad_DAPI_40x8bit_2016_11_07_siTaz_2.tif	43			1149	Exp3_27217_DAPI_VeCad_Phalloidin_siYapTaz_3.tif	53
																															1141	4			1150	VeCad_DAPI_40x8bit_2016_11_07_siYapTaz_5.tif	46			1150	Exp2_13317_DAPI_VeCad_Phalloidin_siYapTaz_3.tif	0
																															1142	0			1151	VeCad_DAPI_40x8bit_2016_11_07_siYap_3.tif	83			1151	Exp2_13317_DAPI_VeCad_Phalloidin_siCTR_3.tif	99
																															1143	3			1152	VeCad_DAPI_40x8bit_2016_11_07_siCTR_3.tif	74			1152	Exp3_27217_DAPI_VeCad_Phalloidin_siYapTaz_2.tif	7
																															1144	0			1153	VeCad_DAPI_40x8bit_2016_11_07_siYapTaz_2.tif	77			1153	Exp3_27217_DAPI_VeCad_Phalloidin_siYap_2.tif	98
																															1145	1			1154	VeCad_DAPI_40x8bit_2016_11_07_siYapTaz_1.tif	46			1154	Exp3_27217_DAPI_VeCad_Phalloidin_siCTR_2.tif	94
																															1146	0			1155	VeCad_DAPI_40x8bit_2016_11_07_siTaz_4.tif	27			1155	Exp2_13317_DAPI_VeCad_Phalloidin_siCTR_4.tif	27
																															1147	0			1156	VeCad_DAPI_40x8bit_2016_11_07_siTaz_3.tif	13			1156	Exp2_13317_DAPI_VeCad_Phalloidin_siYap_4.tif	97
																															1148	0			1157	VeCad_DAPI_40x8bit_2016_11_07_siYapTaz_4.tif	48			1157	Exp2_13317_DAPI_VeCad_Phalloidin_siYapTaz_5.tif	50
																															1149	0			1158	VeCad_DAPI_40x8bit_2016_11_07_siYapTaz_4.tif	47			1158	Exp2_13317_DAPI_VeCad_Phalloidin_siYapTaz_3.tif	60
																															1150	5			1159	VeCad_DAPI_40x8bit_2016_11_07_siTaz_1.tif	78			1159	Exp3_27217_DAPI_VeCad_Phalloidin_siCTR_3.tif	77
																															1151	4			1160	VeCad_DAPI_40x8bit_2016_11_07_siTaz_4.tif	44			1160	Exp2_13317_DAPI_VeCad_Phalloidin_siYapTaz_5.tif	87
																															1152	2			1161	VeCad_DAPI_40x8bit_2016_11_07_siCTR_1.tif	7			1161	Exp2_13317_DAPI_VeCad_Phalloidin_siYap_3.tif	7
																															1153	3			1162	VeCad_DAPI_40x8bit_2016_11_07_siTaz_4.tif	46			1162	Exp2_13317_DAPI_VeCad_Phalloidin_siTaz_3.tif	31
																															1154	1			1163	VeCad_DAPI_40x8bit_2016_11_07_siTaz_3.tif	70			1163	Exp3_27217_DAPI_VeCad_Phalloidin_siYapTaz_3.tif	28
																															1155	0			1164	VeCad_DAPI_40x8bit_2016_11_07_siYapTaz_3.tif	90			1164	Exp3_27217_DAPI_VeCad_Phalloidin_siYapTaz_3.tif	33
																															1156	1			1165	VeCad_DAPI_40x8bit_2016_11_07_siYapTaz_2.tif	90			1165	Exp3_27217_DAPI_VeCad_Phalloidin_siYapTaz_1.tif	86
																															1157	1			1166	VeCad_DAPI_40x8bit_2016_11_07_siYap_2.tif	13			1166	Exp2_13317_DAPI_VeCad_Phalloidin_siTaz_5.tif	13
																															1158	0			1167	VeCad_DAPI_40x8bit_2016_11_07_siYapTaz_3.tif	3			1167	Exp2_13317_DAPI_VeCad_Phalloidin_siYapTaz_1.tif	49
																															1159	4			1168	VeCad_DAPI_40x8bit_2016_11_07_siCTR_1.tif	84			1168	Exp2_13317_DAPI_VeCad_Phalloidin_siCTR_4.tif	10
																															1160	0			1169	VeCad_DAPI_40x8bit_2016_11_07_siYapTaz_5.tif	32			1169	Exp2_13317_DAPI_VeCad_Phalloidin_siCTR_4.tif	73
																															1161	1			1170	VeCad_DAPI_40x8bit_2016_11_07_siYapTaz_5.tif	50			1170	Exp3_27217_DAPI_VeCad_Phalloidin_siYap_2.tif	8
																															1162	0			1171	VeCad_DAPI_40x8bit_2016_11_07_siYapTaz_3.tif	27			1171	Exp3_27217_DAPI_VeCad_Phalloidin_siYap_3.tif	52
																															1163	1			1172	VeCad_DAPI_40x8bit_2016_11_07_siTaz_3.tif	44			1172	Exp2_13317_DAPI_VeCad_Phalloidin_siYap_2.tif	75
																															1164	2			1173	VeCad_DAPI_40x8bit_2016_11_07_siYapTaz_2.tif	4			1173	Exp3_27217_DAPI_VeCad_Phalloidin_siCTR_4.tif	30
																															1165	0			1174	VeCad_DAPI_40x8bit_2016_11_07_siYap_4.tif	32			1174	Exp3_27217_DAPI_VeCad_Phalloidin_siYap_3.tif	36
																															1166	2			1175	VeCad_DAPI_40x8bit_2016_11_07_siTaz_5.tif	11			1175	Exp2_13317_DAPI_VeCad_Phalloidin_siCTR_1.tif	14
																															1167	1			1176	VeCad_DAPI_40x8bit_2016_11_07_siYap_4.tif	46			1176	Exp3_27217_DAPI_VeCad_Phalloidin_siCTR_4.tif	45
																															1168	0			1177	VeCad_DAPI_40x8bit_2016_11_07_siYapTaz_3.tif	98			1177	Exp2_13317_DAPI_VeCad_Phalloidin_siCTR_3.tif	71
																															1169	4			1178	VeCad_DAPI_40x8bit_2016_11_07_siYapTaz_1.tif	31			1178	Exp2_13317_DAPI_VeCad_Phalloidin_siTaz_1.tif	25
																															1170	1			1179	VeCad_DAPI_40x8bit_2016_11_07_siYap_4.tif	62			1179	Exp3_27217_DAPI_VeCad_Phalloidin_siYap_5.tif	83
																															1171	0			1180	VeCad_DAPI_40x8bit_2016_11_07_siTaz_1.tif	14			1180	Exp2_13317_DAPI_VeCad_Phalloidin_siTaz_1.tif	11
																															1172	1			1181	VeCad_DAPI_40x8bit_2016_11_07_siYapTaz_2.tif	20			1181	Exp2_13317_DAPI_VeCad_Phalloidin_siTaz_2.tif	55
																															1173	0			1182	VeCad_DAPI_40x8bit_2016_11_07_siTaz_2.tif	75			1182	Exp2_13317_DAPI_VeCad_Phalloidin_siCTR_1.tif	31
																															1174	0			1183	VeCad_DAPI_40x8bit_2016_11_07_siYapTaz_2.tif	72			1183	Exp3_27217_DAPI_VeCad_Phalloidin_siCTR_4.tif	25
																															1175	0			1184	VeCad_DAPI_40x8bit_2016_11_07_siTaz_2.tif	50			1184	Exp3_27217_DAPI_VeCad_Phalloidin_siYapTaz_2.tif	50
																															1176	4			1185	VeCad_DAPI_40x8bit_2016_11_07_siYap_2.tif	95			1185	Exp2_13317_DAPI_VeCad_Phalloidin_siYap_2.tif	30
																															1177	1			1186	VeCad_DAPI_40x8bit_2016_11_07_siTaz_2.tif	67			1186	Exp3_27217_DAPI_VeCad_Phalloidin_siYapTaz_2.tif	96
																															1178	2			1187	VeCad_DAPI_40x8bit_2016_11_07_siTaz_1.tif	17			1187	Exp2_13317_DAPI_VeCad_Phalloidin_siYapTaz_3.tif	28
																															1179	0			1188	VeCad_DAPI_40x8bit_2016_11_07_siTaz_5.tif	69			1188	Exp3_27217_DAPI_VeCad_Phalloidin_siCTR_3.tif	7
																															1180	2			1189	VeCad_DAPI_40x8bit_2016_11_07_siTaz_3.tif	31			1189	Exp2_13317_DAPI_VeCad_Phalloidin_siCTR_2.tif	69
																															1181	3			1190	VeCad_DAPI_40x8bit_2016_11_07_siYapTaz_3.tif	57			1190	Exp3_27217_DAPI_VeCad_Phalloidin_siYapTaz_3.tif	78
																															1182	3			1191	VeCad_DAPI_40x8bit_2016_11_07_siTaz_3.tif	33			1191	Exp3_27217_DAPI_VeCad_Phalloidin_siCTR_3.tif	67
																															1183	3			1192	VeCad_DAPI_40x8bit_2016_11_07_siCTR_3.tif	0			1192	Exp3_27217_DAPI_VeCad_Phalloidin_siYap_4.tif	55
																															1184	5			1193	VeCad_DAPI_40x8bit_2016_11_07_siCTR_1.tif	51			1193	Exp2_13317_DAPI_VeCad_Phalloidin_siYapTaz_3.tif	43
																															1185	0			1194	VeCad_DAPI_40x8bit_2016_11_07_siCTR_1.tif	90			1194	Exp3_27217_DAPI_VeCad_Phalloidin_siCTR_3.tif	4
																															1186	1			1195	VeCad_DAPI_40x8bit_2016_11_07_siYap_2.tif	98			1195	Exp2_13317_DAPI_VeCad_Phalloidin_siYapTaz_4.tif	26
																															1187	0			1196	VeCad_DAPI_40x8bit_2016_11_07_siTaz_4.tif	8			1196	Exp3_27217_DAPI_VeCad_Phalloidin_siYap_5.tif	91
																															1188	4			1197	VeCad_DAPI_40x8bit_2016_11_07_siYap_4.tif	50			1197	Exp3_27217_DAPI_VeCad_Phalloidin_siYapTaz_3.tif	41
																															1189	2			1198	VeCad_DAPI_40x8bit_2016_11_07_siCTR_5.tif	34			1198	Exp3_27217_DAPI_VeCad_Phalloidin_siYap_3.tif	95
																															1190	2			1199	VeCad_DAPI_40x8bit_2016_11_07_siYapTaz_5.tif	2			1199	Exp3_27217_DAPI_VeCad_Phalloidin_siCTR_5.tif	10
																															1191	1			1200	VeCad_DAPI_40x8bit_2016_11_07_siYap_1.tif	57			1200	Exp3_27217_DAPI_VeCad_Phalloidin_siYapTaz_3.tif	10
																															1192	0			1201	VeCad_DAPI_40x8bit_2016_11_07_siYap_4.tif	61			1201	Exp2_13317_DAPI_VeCad_Phalloidin_siCTR_5.tif	85
																															1193	3			1202	VeCad_DAPI_40x8bit_2016_11_07_siYap_5.tif	40			1202	Exp2_13317_DAPI_VeCad_Phalloidin_siCTR_3.tif	8
																															1194	4			1203	VeCad_DAPI_40x8bit_2016_11_07_siYapTaz_3.tif	46			1203	Exp2_13317_DAPI_VeCad_Phalloidin_siCTR_1.tif	32
																															1195	2			1204	VeCad_DAPI_40x8bit_2016_11_07_siTaz_2.tif	44			1204	Exp2_13317_DAPI_VeCad_Phalloidin_siYap_1.tif	14
																															1196	1			1205	VeCad_DAPI_40x8bit_2016_11_07_siTaz_3.tif	28			1205	Exp3_27217_DAPI_VeCad_Phalloidin_siCTR_2.tif	17
																															1197	0			1206	VeCad_DAPI_40x8bit_2016_11_07_siCTR_1.tif	72			1206	Exp2_13317_DAPI_VeCad_Phalloidin_siTaz_2.tif	34
																															1198	0			1207	VeCad_DAPI_40x8bit_2016_11_07_siYapTaz_5.tif	7			1207	Exp2_13317_DAPI_VeCad_Phalloidin_siYapTaz_3.tif	13
																															1199	3			1208	VeCad_DAPI_40x8bit_2016_11_07_siTaz_2.tif	57			1208	Exp3_27217_DAPI_VeCad_Phalloidin_siCTR_3.tif	97
																															1200	5			1209	VeCad_DAPI_40x8bit_2016_11_07_siYapTaz_5.tif	36			1209	Exp2_13317_DAPI_VeCad_Phalloidin_siCTR_1.tif	5
																															1201	3			1210	VeCad_DAPI_40x8bit_2016_11_07_siTaz_5.tif	76			1210	Exp3_27217_DAPI_VeCad_Phalloidin_siYap_4.tif	22
																															1202	0			1211	VeCad_DAPI_40x8bit_2016_11_07_siTaz_2.tif	9			1211	Exp3_27217_DAPI_VeCad_Phalloidin_siYapTaz_4.tif	76
																															1203	3			1212	VeCad_DAPI_40x8bit_2016_11_07_siTaz_3.tif	46			1212	Exp2_13317_DAPI_VeCad_Phalloidin_siTaz_1.tif	15
																															1204	0			1213	VeCad_DAPI_40x8bit_2016_11_07_siTaz_5.tif	19			1213	Exp3_27217_DAPI_VeCad_Phalloidin_siYap_3.tif	46
																															1205	1			1214	VeCad_DAPI_40x8bit_2016_11_07_siTaz_2.tif	61			1214	Exp3_27217_DAPI_VeCad_Phalloidin_siYapTaz_4.tif	45
																															1206	2			1215	VeCad_DAPI_40x8bit_2016_11_07_siYap_2.tif	86			1215	Exp2_13317_DAPI_VeCad_Phalloidin_siCTR_2.tif	63
																															1207	2			1216	VeCad_DAPI_40x8bit_2016_11_07_siYapTaz_3.tif	2			1216	Exp2_13317_DAPI_VeCad_Phalloidin_siCTR_5.tif	69
																															1208	3			1217	VeCad_DAPI_40x8bit_2016_11_07_siTaz_3.tif	2			1217	Exp3_27217_DAPI_VeCad_Phalloidin_siYapTaz_3.tif	86
																															1209	1			1218	VeCad_DAPI_40x8bit_2016_11_07_siYapTaz_3.tif	82			1218	Exp3_27217_DAPI_VeCad_Phalloidin_siYapTaz_2.tif	85
																															1210	0			1219	VeCad_DAPI_40x8bit_2016_11_07_siCTR_3.tif	67			1219	Exp3_27217_DAPI_VeCad_Phalloidin_siYapTaz_2.tif	61
																															1211	5			1220	VeCad_DAPI_40x8bit_2016_11_07_siTaz_5.tif	89			1220	Exp2_13317_DAPI_VeCad_Phalloidin_siYap_1.tif	43
																															1212	2			1221	VeCad_DAPI_40x8bit_2016_11_07_siYapTaz_2.tif	87			1221	Exp3_27217_DAPI_VeCad_Phalloidin_siCTR_1.tif	49
																															1213	1			1222	VeCad_DAPI_40x8bit_2016_11_07_siTaz_2.tif	13			1222	Exp2_13317_DAPI_VeCad_Phalloidin_siTaz_1.tif	29
																															1214	5			1223	VeCad_DAPI_40x8bit_2016_11_07_siYap_5.tif	71			1223	Exp3_27217_DAPI_VeCad_Phalloidin_siCTR_5.tif	32
																															1215	3			1224	VeCad_DAPI_40x8bit_2016_11_07_siYapTaz_1.tif	71			1224	Exp3_27217_DAPI_VeCad_Phalloidin_siCTR_3.tif	23
																															1216	4			1225	VeCad_DAPI_40x8bit_2016_11_07_siYap_4.tif	64			1225	Exp2_13317_DAPI_VeCad_Phalloidin_siYapTaz_5.tif	80
																															1217	0			1226	VeCad_DAPI_40x8bit_2016_11_07_siTaz_1.tif	6			1226	Exp3_27217_DAPI_VeCad_Phalloidin_siYap_1.tif	39
																															1218	0			1227	VeCad_DAPI_40x8bit_2016_11_07_siCTR_2.tif	77			1227	Exp3_27217_DAPI_VeCad_Phalloidin_siCTR_4.tif	95
																															1219	1			1228	VeCad_DAPI_40x8bit_2016_11_07_siTaz_3.tif	71			1228	Exp3_27217_DAPI_VeCad_Phalloidin_siYapTaz_1.tif	6
																															1220	1			1229	VeCad_DAPI_40x8bit_2016_11_07_siYapTaz_5.tif	94			1229	Exp2_13317_DAPI_VeCad_Phalloidin_siYap_4.tif	20
																															1221	1			1230	VeCad_DAPI_40x8bit_2016_11_07_siCTR_3.tif	92			1230	Exp2_13317_DAPI_VeCad_Phalloidin_siCTR_2.tif	59
																															1222	0			1231	VeCad_DAPI_40x8bit_2016_11_07_siYapTaz_2.tif	51			1231	Exp2_13317_DAPI_VeCad_Phalloidin_siYap_2.tif	47
																															1223	3			1232	VeCad_DAPI_40x8bit_2016_11_07_siYap_1.tif	69			1232	Exp2_13317_DAPI_VeCad_Phalloidin_siYapTaz_1.tif	2
																															1224	1			1233	VeCad_DAPI_40x8bit_2016_11_07_siCTR_2.tif	46			1233	Exp3_27217_DAPI_VeCad_Phalloidin_siYapTaz_4.tif	20
																															1225	0			1234	VeCad_DAPI_40x8bit_2016_11_07_siCTR_1.tif	95			1234	Exp2_13317_DAPI_VeCad_Phalloidin_siCTR_5.tif	24
																															1226	1			1235	VeCad_DAPI_40x8bit_2016_11_07_siYapTaz_3.tif	85			1235	Exp2_13317_DAPI_VeCad_Phalloidin_siCTR_2.tif	79
																															1227	3			1236	VeCad_DAPI_40x8bit_2016_11_07_siYapTaz_1.tif	3			1236	Exp2_13317_DAPI_VeCad_Phalloidin_siTaz_5.tif	56
																															1228	2			1237	VeCad_DAPI_40x8bit_2016_11_07_siYap_4.tif	95			1237	Exp2_13317_DAPI_VeCad_Phalloidin_siYapTaz_2.tif	8
																															1229	0			1238	VeCad_DAPI_40x8bit_2016_11_07_siTaz_2.tif	18			1238	Exp2_13317_DAPI_VeCad_Phalloidin_siYap_2.tif	70
																															1230	3			1239	VeCad_DAPI_40x8bit_2016_11_07_siYap_5.tif	81			1239	Exp2_13317_DAPI_VeCad_Phalloidin_siTaz_4.tif	77
																															1231	1			1240	VeCad_DAPI_40x8bit_2016_11_07_siYap_2.tif	60			1240	Exp3_27217_DAPI_VeCad_Phalloidin_siYapTaz_5.tif	62
																															1232	0			1241	VeCad_DAPI_40x8bit_2016_11_07_siYap_1.tif	90			1241	Exp3_27217_DAPI_VeCad_Phalloidin_siYapTaz_5.tif	99
																															1233	0			1242	VeCad_DAPI_40x8bit_2016_11_07_siYap_5.tif	53			1242	Exp3_27217_DAPI_VeCad_Phalloidin_siCTR_4.tif	86
																															1234	3			1243	VeCad_DAPI_40x8bit_2016_11_07_siTaz_5.tif	95			1243	Exp3_27217_DAPI_VeCad_Phalloidin_siYapTaz_4.tif	64
																															1235	3	5		1244	VeCad_DAPI_40x8bit_2016_11_07_siTaz_5.tif	93			1244	Exp3_27217_DAPI_VeCad_Phalloidin_siYap_4.tif	92
																															1236	5			1245	VeCad_DAPI_40x8bit_2016_11_07_siYapTaz_2.tif	99			1245	Exp3_27217_DAPI_VeCad_Phalloidin_siYap_5.tif	68
																															1237	0			1246	VeCad_DAPI_40x8bit_2016_11_07_siTaz_1.tif	52			1246	Exp2_13317_DAPI_VeCad_Phalloidin_siYap_1.tif	57
																															1238	1			1247	VeCad_DAPI_40x8bit_2016_11_07_siCTR_5.tif	81			1247	Exp2_13317_DAPI_VeCad_Phalloidin_siCTR_1.tif	55
																															1239	2			1248	VeCad_DAPI_40x8bit_2016_11_07_siCTR_5.tif	98			1248	Exp2_13317_DAPI_VeCad_Phalloidin_siYap_4.tif	57
																															1240	1			1249	VeCad_DAPI_40x8bit_2016_11_07_siYapTaz_1.tif	58			1249	Exp3_27217_DAPI_VeCad_Phalloidin_siCTR_1.tif	84
																															1241	1			1250	VeCad_DAPI_40x8bit_2016_11_07_siTaz_3.tif	63			1250	Exp2_13317_DAPI_VeCad_Phalloidin_siTaz_3.tif	36
																															1242	5			1251	VeCad_DAPI_40x8bit_2016_11_07_siYap_5.tif	35			1251	Exp2_13317_DAPI_VeCad_Phalloidin_siYap_1.tif	58
																															1243	1			1252	VeCad_DAPI_40x8bit_2016_11_07_siYap_4.tif	81			1252	Exp3_27217_DAPI_VeCad_Phalloidin_siCTR_1.tif	48
																															1244	1			1253	VeCad_DAPI_40x8bit_2016_11_07_siYapTaz_4.tif	15			1253	Exp2_13317_DAPI_VeCad_Phalloidin_siYapTaz_1.tif	5
																															1245	0			1254	VeCad_DAPI_40x8bit_2016_11_07_siYap_1.tif	19			1254	Exp3_27217_DAPI_VeCad_Phalloidin_siCTR_2.tif	98
																															1246	0			1255	VeCad_DAPI_40x8bit_2016_11_07_siYap_4.tif	88			1255	Exp2_13317_DAPI_VeCad_Phalloidin_siYap_4.tif	91
																															1247	3			1256	VeCad_DAPI_40x8bit_2016_11_07_siYapTaz_3.tif	61			1256	Exp2_13317_DAPI_VeCad_Phalloidin_siYap_5.tif	72
																															1248	1			1257	VeCad_DAPI_40x8bit_2016_11_07_siTaz_3.tif	39			1257	Exp2_13317_DAPI_VeCad_Phalloidin_siCTR_3.tif	9
																															1249	0			1258	VeCad_DAPI_40x8bit_2016_11_07_siYap_1.tif	95			1258	Exp3_27217_DAPI_VeCad_Phalloidin_siYap_1.tif	65
																															1250	0			1259	VeCad_DAPI_40x8bit_2016_11_07_siYapTaz_1.tif	91			1259	Exp2_13317_DAPI_VeCad_Phalloidin_siYap_3.tif	40
																															1251	1			1260	VeCad_DAPI_40x8bit_2016_11_07_siTaz_1.tif	4			1260	Exp2_13317_DAPI_VeCad_Phalloidin_siTaz_5.tif	2
																															1252	0			1261	VeCad_DAPI_40x8bit_2016_11_07_siYapTaz_3.tif	86			1261	Exp2_13317_DAPI_VeCad_Phalloidin_siCTR_4.tif	55
																															1253	0			1262	VeCad_DAPI_40x8bit_2016_11_07_siCTR_3.tif	93			1262	Exp3_27217_DAPI_VeCad_Phalloidin_siYap_5.tif	86
																															1254	0			1263	VeCad_DAPI_40x8bit_2016_11_07_siYapTaz_4.tif	26			1263	Exp2_13317_DAPI_VeCad_Phalloidin_siYapTaz_2.tif	57
																															1255	0			1264	VeCad_DAPI_40x8bit_2016_11_07_siTaz_1.tif	69			1264	Exp2_13317_DAPI_VeCad_Phalloidin_siYap_5.tif	55
																															1256	0			1265	VeCad_DAPI_40x8bit_2016_11_07_siTaz_2.tif	77			1265	Exp2_13317_DAPI_VeCad_Phalloidin_siTaz_5.tif	70
																															1257	4			1266	VeCad_DAPI_40x8bit_2016_11_07_siCTR_4.tif	15			1266	Exp3_27217_DAPI_VeCad_Phalloidin_siYapTaz_2.tif	37
																															1258	0			1267	VeCad_DAPI_40x8bit_2016_11_07_siYapTaz_3.tif	10			1267	Exp2_13317_DAPI_VeCad_Phalloidin_siYap_4.tif	82
																															1259	0			1268	VeCad_DAPI_40x8bit_2016_11_07_siTaz_2.tif	95			1268	Exp2_13317_DAPI_VeCad_Phalloidin_siYap_4.tif	63
																															1260	0			1269	VeCad_DAPI_40x8bit_2016_11_07_siTaz_1.tif	80			1269	Exp2_13317_DAPI_VeCad_Phalloidin_siYapTaz_3.tif	91
																															1261	0			1270	VeCad_DAPI_40x8bit_2016_11_07_siYapTaz_3.tif	47			1270	Exp2_13317_DAPI_VeCad_Phalloidin_siYap_1.tif	45
																															1262	1			1271	VeCad_DAPI_40x8bit_2016_11_07_siYap_2.tif	54			1271	Exp2_13317_DAPI_VeCad_Phalloidin_siTaz_5.tif	1
																															1263	2			1272	VeCad_DAPI_40x8bit_2016_11_07_siYapTaz_2.tif	24			1272	Exp2_13317_DAPI_VeCad_Phalloidin_siCTR_3.tif	87
																															1264	0			1273	VeCad_DAPI_40x8bit_2016_11_07_siTaz_5.tif	21			1273	Exp2_13317_DAPI_VeCad_Phalloidin_siYap_1.tif	70
																															1265	2			1274	VeCad_DAPI_40x8bit_2016_11_07_siYap_2.tif	45			1274	Exp2_13317_DAPI_VeCad_Phalloidin_siTaz_2.tif	74
																															1266	0			1275	VeCad_DAPI_40x8bit_2016_11_07_siYap_2.tif	4			1275	Exp2_13317_DAPI_VeCad_Phalloidin_siTaz_1.tif	56
																															1267	0			1276	VeCad_DAPI_40x8bit_2016_11_07_siYapTaz_3.tif	5			1276	Exp2_13317_DAPI_VeCad_Phalloidin_siCTR_2.tif	98
																															1268	1			1277	VeCad_DAPI_40x8bit_2016_11_07_siYap_5.tif	75			1277	Exp3_27217_DAPI_VeCad_Phalloidin_siCTR_4.tif	90
																															1269	0			1278	VeCad_DAPI_40x8bit_2016_11_07_siYap_5.tif	84			1278	Exp2_13317_DAPI_VeCad_Phalloidin_siYapTaz_2.tif	50
																															1270	0			1279	VeCad_DAPI_40x8bit_2016_11_07_siYap_3.tif	9			1279	Exp3_27217_DAPI_VeCad_Phalloidin_siYap_4.tif	60
																															1271	0			1280	VeCad_DAPI_40x8bit_2016_11_07_siTaz_4.tif	70			1280	Exp2_13317_DAPI_VeCad_Phalloidin_siTaz_5.tif	23
																															1272	2	3		1281	VeCad_DAPI_40x8bit_2016_11_07_siYap_2.tif	66			1281	Exp3_27217_DAPI_VeCad_Phalloidin_siYapTaz_4.tif	22
																															1273	1			1282	VeCad_DAPI_40x8bit_2016_11_07_siTaz_3.tif	42			1282	Exp2_13317_DAPI_VeCad_Phalloidin_siCTR_4.tif	79
																															1274	2			1283	VeCad_DAPI_40x8bit_2016_11_07_siYap_1.tif	2			1283	Exp2_13317_DAPI_VeCad_Phalloidin_siTaz_4.tif	66
																															1275	2			1284	VeCad_DAPI_40x8bit_2016_11_07_siYapTaz_2.tif	12			1284	Exp2_13317_DAPI_VeCad_Phalloidin_siYapTaz_5.tif	71
																															1276	0			1285	VeCad_DAPI_40x8bit_2016_11_07_siCTR_2.tif	26			1285	Exp2_13317_DAPI_VeCad_Phalloidin_siYapTaz_5.tif	3
																															1277	1			1286	VeCad_DAPI_40x8bit_2016_11_07_siCTR_1.tif	14			1286	Exp2_13317_DAPI_VeCad_Phalloidin_siCTR_1.tif	62
																															1278	5			1287	VeCad_DAPI_40x8bit_2016_11_07_siTaz_5.tif	85			1287	Exp2_13317_DAPI_VeCad_Phalloidin_siYapTaz_1.tif	45
																															1279	1			1288	VeCad_DAPI_40x8bit_2016_11_07_siCTR_1.tif	89			1288	Exp3_27217_DAPI_VeCad_Phalloidin_siYapTaz_2.tif	10
																															1280	0			1289	VeCad_DAPI_40x8bit_2016_11_07_siYap_3.tif	79			1289	Exp2_13317_DAPI_VeCad_Phalloidin_siYapTaz_3.tif	94
																															1281	0			1290	VeCad_DAPI_40x8bit_2016_11_07_siTaz_1.tif	95			1290	Exp3_27217_DAPI_VeCad_Phalloidin_siCTR_3.tif	0
																															1282	0			1291	VeCad_DAPI_40x8bit_2016_11_07_siYap_5.tif	85			1291	Exp2_13317_DAPI_VeCad_Phalloidin_siTaz_2.tif	68
																															1283	0			1292	VeCad_DAPI_40x8bit_2016_11_07_siCTR_5.tif	20			1292	Exp2_13317_DAPI_VeCad_Phalloidin_siCTR_3.tif	17
																															1284	5			1293	VeCad_DAPI_40x8bit_2016_11_07_siYapTaz_5.tif	18			1293	Exp2_13317_DAPI_VeCad_Phalloidin_siYapTaz_3.tif	75
																															1285	5			1294	VeCad_DAPI_40x8bit_2016_11_07_siCTR_5.tif	87			1294	Exp3_27217_DAPI_VeCad_Phalloidin_siYap_3.tif	10
																															1286	2			1295	VeCad_DAPI_40x8bit_2016_11_07_siYapTaz_5.tif	42			1295	Exp2_13317_DAPI_VeCad_Phalloidin_siCTR_1.tif	95
																															1287	3			1296	VeCad_DAPI_40x8bit_2016_11_07_siCTR_2.tif	34			1296	Exp2_13317_DAPI_VeCad_Phalloidin_siCTR_4.tif	21
																															1288	5			1297	VeCad_DAPI_40x8bit_2016_11_07_siCTR_5.tif	38			1297	Exp2_13317_DAPI_VeCad_Phalloidin_siYap_5.tif	39
																															1289	0			1298	VeCad_DAPI_40x8bit_2016_11_07_siCTR_4.tif	42			1298	Exp3_27217_DAPI_VeCad_Phalloidin_siYap_1.tif	96
																															1290	1			1299	VeCad_DAPI_40x8bit_2016_11_07_siCTR_5.tif	96			1299	Exp2_13317_DAPI_VeCad_Phalloidin_siYap_5.tif	27
																															1291	0			1300	VeCad_DAPI_40x8bit_2016_11_07_siYap_5.tif	30			1300	Exp3_27217_DAPI_VeCad_Phalloidin_siYapTaz_5.tif	83
																															1292	4			1301	VeCad_DAPI_40x8bit_2016_11_07_siYap_4.tif	55			1301	Exp3_27217_DAPI_VeCad_Phalloidin_siCTR_3.tif	66
																															1293	5			1302	VeCad_DAPI_40x8bit_2016_11_07_siYap_3.tif	31			1302	Exp3_27217_DAPI_VeCad_Phalloidin_siYapTaz_4.tif	9
																															1294	1			1303	VeCad_DAPI_40x8bit_2016_11_07_siYapTaz_5.tif	88			1303	Exp2_13317_DAPI_VeCad_Phalloidin_siTaz_2.tif	60
																															1295	2			1304	VeCad_DAPI_40x8bit_2016_11_07_siCTR_2.tif	7			1304	Exp2_13317_DAPI_VeCad_Phalloidin_siYapTaz_2.tif	65
																															1296	0			1305	VeCad_DAPI_40x8bit_2016_11_07_siYap_5.tif	82			1305	Exp2_13317_DAPI_VeCad_Phalloidin_siYapTaz_5.tif	2
																															1297	1			1306	VeCad_DAPI_40x8bit_2016_11_07_siTaz_1.tif	98			1306	Exp2_13317_DAPI_VeCad_Phalloidin_siCTR_2.tif	50
																															1298	0			1307	VeCad_DAPI_40x8bit_2016_11_07_siCTR_3.tif	65			1307	Exp2_13317_DAPI_VeCad_Phalloidin_siYap_3.tif	84
																															1299	0			1308	VeCad_DAPI_40x8bit_2016_11_07_siYapTaz_5.tif	97			1308	Exp2_13317_DAPI_VeCad_Phalloidin_siCTR_3.tif	94
																															1300	1			1309	VeCad_DAPI_40x8bit_2016_11_07_siCTR_3.tif	8			1309	Exp3_27217_DAPI_VeCad_Phalloidin_siCTR_2.tif	26
																															1301	1			1310	VeCad_DAPI_40x8bit_2016_11_07_siCTR_5.tif	54			1310	Exp3_27217_DAPI_VeCad_Phalloidin_siYapTaz_1.tif	24
																															1302	5			1311	VeCad_DAPI_40x8bit_2016_11_07_siCTR_4.tif	22			1311	Exp2_13317_DAPI_VeCad_Phalloidin_siYap_3.tif	85
																															1303	0			1312	VeCad_DAPI_40x8bit_2016_11_07_siCTR_1.tif	64			1312	Exp2_13317_DAPI_VeCad_Phalloidin_siYap_5.tif	70
																															1304	1			1313	VeCad_DAPI_40x8bit_2016_11_07_siCTR_5.tif	58			1313	Exp2_13317_DAPI_VeCad_Phalloidin_siYap_1.tif	3
																															1305	3			1314	VeCad_DAPI_40x8bit_2016_11_07_siYapTaz_1.tif	41			1314	Exp3_27217_DAPI_VeCad_Phalloidin_siCTR_4.tif	71
																															1306	1			1315	VeCad_DAPI_40x8bit_2016_11_07_siCTR_2.tif	44			1315	Exp2_13317_DAPI_VeCad_Phalloidin_siCTR_5.tif	45
																															1307	1			1316	VeCad_DAPI_40x8bit_2016_11_07_siYapTaz_2.tif	33			1316	Exp3_27217_DAPI_VeCad_Phalloidin_siYap_2.tif	62
																															1308	0			1317	VeCad_DAPI_40x8bit_2016_11_07_siCTR_5.tif	11			1317	Exp3_27217_DAPI_VeCad_Phalloidin_siYapTaz_3.tif	75
																															1309	0			1318	VeCad_DAPI_40x8bit_2016_11_07_siTaz_3.tif	38			1318	Exp2_13317_DAPI_VeCad_Phalloidin_siTaz_1.tif	23
																															1310	0			1319	VeCad_DAPI_40x8bit_2016_11_07_siCTR_3.tif	86			1319	Exp3_27217_DAPI_VeCad_Phalloidin_siYapTaz_2.tif	35
																															1311	0			1320	VeCad_DAPI_40x8bit_2016_11_07_siYap_4.tif	83			1320	Exp3_27217_DAPI_VeCad_Phalloidin_siYapTaz_5.tif	90
																															1312	0			1321	VeCad_DAPI_40x8bit_2016_11_07_siTaz_1.tif	59			1321	Exp2_13317_DAPI_VeCad_Phalloidin_siYap_2.tif	36
																															1313	2			1322	VeCad_DAPI_40x8bit_2016_11_07_siYapTaz_4.tif	79			1322	Exp3_27217_DAPI_VeCad_Phalloidin_siCTR_1.tif	41
																															1314	0			1323	VeCad_DAPI_40x8bit_2016_11_07_siCTR_2.tif	48			1323	Exp2_13317_DAPI_VeCad_Phalloidin_siCTR_4.tif	75
																															1315	0			1324	VeCad_DAPI_40x8bit_2016_11_07_siTaz_1.tif	30			1324	Exp2_13317_DAPI_VeCad_Phalloidin_siYap_5.tif	11
																															1316	0			1325	VeCad_DAPI_40x8bit_2016_11_07_siYapTaz_2.tif	70			1325	Exp2_13317_DAPI_VeCad_Phalloidin_siYap_4.tif	46
																															1317	0			1326	VeCad_DAPI_40x8bit_2016_11_07_siCTR_5.tif	49			1326	Exp3_27217_DAPI_VeCad_Phalloidin_siCTR_3.tif	16
																															1318	2			1327	VeCad_DAPI_40x8bit_2016_11_07_siYapTaz_3.tif	34			1327	Exp3_27217_DAPI_VeCad_Phalloidin_siYap_1.tif	94
																															1319	3			1328	VeCad_DAPI_40x8bit_2016_11_07_siCTR_3.tif	31			1328	Exp2_13317_DAPI_VeCad_Phalloidin_siTaz_1.tif	13
																															1320	1			1329	VeCad_DAPI_40x8bit_2016_11_07_siTaz_3.tif	75			1329	Exp2_13317_DAPI_VeCad_Phalloidin_siYap_4.tif	99
																															1321	1			1330	VeCad_DAPI_40x8bit_2016_11_07_siYapTaz_4.tif	39			1330	Exp3_27217_DAPI_VeCad_Phalloidin_siCTR_1.tif	32
																															1322	0			1331	VeCad_DAPI_40x8bit_2016_11_07_siYap_4.tif	82			1331	Exp3_27217_DAPI_VeCad_Phalloidin_siYapTaz_2.tif	36
																															1323	4			1332	VeCad_DAPI_40x8bit_2016_11_07_siTaz_3.tif	76			1332	Exp3_27217_DAPI_VeCad_Phalloidin_siYapTaz_2.tif	88
																															1324	0			1333	VeCad_DAPI_40x8bit_2016_11_07_siYapTaz_1.tif	42			1333	Exp2_13317_DAPI_VeCad_Phalloidin_siYapTaz_4.tif	38
																															1325	1			1334	VeCad_DAPI_40x8bit_2016_11_07_siYapTaz_4.tif	72			1334	Exp2_13317_DAPI_VeCad_Phalloidin_siTaz_2.tif	54
																															1326	1			1335	VeCad_DAPI_40x8bit_2016_11_07_siYapTaz_2.tif	69			1335	Exp2_13317_DAPI_VeCad_Phalloidin_siTaz_2.tif	31
																															1327	1			1336	VeCad_DAPI_40x8bit_2016_11_07_siYapTaz_5.tif	91			1336	Exp3_27217_DAPI_VeCad_Phalloidin_siYapTaz_1.tif	36
																															1328	2			1337	VeCad_DAPI_40x8bit_2016_11_07_siCTR_3.tif	23			1337	Exp2_13317_DAPI_VeCad_Phalloidin_siCTR_2.tif	13
																															1329	1			1338	VeCad_DAPI_40x8bit_2016_11_07_siCTR_4.tif	59			1338	Exp3_27217_DAPI_VeCad_Phalloidin_siYapTaz_3.tif	42
																															1330	0			1339	VeCad_DAPI_40x8bit_2016_11_07_siTaz_4.tif	97			1339	Exp2_13317_DAPI_VeCad_Phalloidin_siYapTaz_5.tif	32
																															1331	2			1340	VeCad_DAPI_40x8bit_2016_11_07_siCTR_4.tif	45			1340	Exp3_27217_DAPI_VeCad_Phalloidin_siCTR_4.tif	36
																															1332	0			1341	VeCad_DAPI_40x8bit_2016_11_07_siYapTaz_5.tif	68			1341	Exp2_13317_DAPI_VeCad_Phalloidin_siCTR_4.tif	29
																															1333	0			1342	VeCad_DAPI_40x8bit_2016_11_07_siYapTaz_5.tif	38			1342	Exp2_13317_DAPI_VeCad_Phalloidin_siCTR_1.tif	42
																															1334	3			1343	VeCad_DAPI_40x8bit_2016_11_07_siCTR_3.tif	77			1343	Exp3_27217_DAPI_VeCad_Phalloidin_siYap_2.tif	67
																															1335	4			1344	VeCad_DAPI_40x8bit_2016_11_07_siYapTaz_1.tif	10			1344	Exp2_13317_DAPI_VeCad_Phalloidin_siYapTaz_2.tif	79
																															1336	0			1345	VeCad_DAPI_40x8bit_2016_11_07_siTaz_3.tif	57			1345	Exp2_13317_DAPI_VeCad_Phalloidin_siTaz_3.tif	29
																															1337	4			1346	VeCad_DAPI_40x8bit_2016_11_07_siYap_2.tif	22			1346	Exp2_13317_DAPI_VeCad_Phalloidin_siCTR_3.tif	85
																															1338	0			1347	VeCad_DAPI_40x8bit_2016_11_07_siCTR_5.tif	19			1347	Exp3_27217_DAPI_VeCad_Phalloidin_siCTR_2.tif	88
																															1339	0			1348	VeCad_DAPI_40x8bit_2016_11_07_siTaz_3.tif	43			1348	Exp2_13317_DAPI_VeCad_Phalloidin_siTaz_2.tif	75
																															1340	5			1349	VeCad_DAPI_40x8bit_2016_11_07_siYap_2.tif	15			1349	Exp3_27217_DAPI_VeCad_Phalloidin_siYap_2.tif	92
																															1341	2			1350	VeCad_DAPI_40x8bit_2016_11_07_siCTR_5.tif	68			1350	Exp2_13317_DAPI_VeCad_Phalloidin_siCTR_3.tif	33
																															1342	3			1351	VeCad_DAPI_40x8bit_2016_11_07_siCTR_5.tif	7			1351	Exp2_13317_DAPI_VeCad_Phalloidin_siTaz_2.tif	78
																															1343	5			1352	VeCad_DAPI_40x8bit_2016_11_07_siTaz_5.tif	84			1352	Exp3_27217_DAPI_VeCad_Phalloidin_siYapTaz_4.tif	26
																															1344	1			1353	VeCad_DAPI_40x8bit_2016_11_07_siYapTaz_5.tif	95			1353	Exp2_13317_DAPI_VeCad_Phalloidin_siCTR_1.tif	72
																															1345	5			1354	VeCad_DAPI_40x8bit_2016_11_07_siTaz_2.tif	99			1354	Exp2_13317_DAPI_VeCad_Phalloidin_siYap_1.tif	79
																															1346	3			1355	VeCad_DAPI_40x8bit_2016_11_07_siYap_4.tif	43			1355	Exp2_13317_DAPI_VeCad_Phalloidin_siCTR_2.tif	18
																															1347	0			1356	VeCad_DAPI_40x8bit_2016_11_07_siYap_4.tif	91			1356	Exp2_13317_DAPI_VeCad_Phalloidin_siYap_3.tif	27
																															1348	4			1357	VeCad_DAPI_40x8bit_2016_11_07_siCTR_1.tif	85			1357	Exp2_13317_DAPI_VeCad_Phalloidin_siYapTaz_5.tif	93
																															1349	1			1358	VeCad_DAPI_40x8bit_2016_11_07_siYapTaz_5.tif	40			1358	Exp3_27217_DAPI_VeCad_Phalloidin_siYap_1.tif	80
																															1350	3			1359	VeCad_DAPI_40x8bit_2016_11_07_siYap_5.tif	9			1359	Exp2_13317_DAPI_VeCad_Phalloidin_siYapTaz_1.tif	4
																															1351	1			1360	VeCad_DAPI_40x8bit_2016_11_07_siCTR_5.tif	97			1360	Exp2_13317_DAPI_VeCad_Phalloidin_siTaz_1.tif	64
																															1352	0			1361	VeCad_DAPI_40x8bit_2016_11_07_siTaz_5.tif	74			1361	Exp3_27217_DAPI_VeCad_Phalloidin_siYapTaz_4.tif	17
																															1353	0			1362	VeCad_DAPI_40x8bit_2016_11_07_siTaz_4.tif	0			1362	Exp3_27217_DAPI_VeCad_Phalloidin_siCTR_4.tif	24
																															1354	1			1363	VeCad_DAPI_40x8bit_2016_11_07_siTaz_4.tif	55			1363	Exp3_27217_DAPI_VeCad_Phalloidin_siYap_4.tif	69
																															1355	0			1364	VeCad_DAPI_40x8bit_2016_11_07_siCTR_2.tif	75			1364	Exp2_13317_DAPI_VeCad_Phalloidin_siCTR_2.tif	76
																															1356	0			1365	VeCad_DAPI_40x8bit_2016_11_07_siTaz_4.tif	65			1365	Exp2_13317_DAPI_VeCad_Phalloidin_siYapTaz_5.tif	10
																															1357	0			1366	VeCad_DAPI_40x8bit_2016_11_07_siTaz_1.tif	10			1366	Exp2_13317_DAPI_VeCad_Phalloidin_siYapTaz_3.tif	93
																															1358	0			1367	VeCad_DAPI_40x8bit_2016_11_07_siYap_1.tif	24			1367	Exp2_13317_DAPI_VeCad_Phalloidin_siTaz_4.tif	45
																															1359	3			1368	VeCad_DAPI_40x8bit_2016_11_07_siYapTaz_4.tif	70			1368	Exp3_27217_DAPI_VeCad_Phalloidin_siCTR_4.tif	22
																															1360	3			1369	VeCad_DAPI_40x8bit_2016_11_07_siYapTaz_2.tif	40			1369	Exp2_13317_DAPI_VeCad_Phalloidin_siYap_1.tif	33
																															1361	0			1370	VeCad_DAPI_40x8bit_2016_11_07_siYap_4.tif	86			1370	Exp2_13317_DAPI_VeCad_Phalloidin_siTaz_2.tif	16
																															1362	4			1371	VeCad_DAPI_40x8bit_2016_11_07_siTaz_3.tif	56			1371	Exp3_27217_DAPI_VeCad_Phalloidin_siYap_1.tif	32
																															1363	0			1372	VeCad_DAPI_40x8bit_2016_11_07_siTaz_1.tif	11			1372	Exp2_13317_DAPI_VeCad_Phalloidin_siYapTaz_2.tif	88
																															1364	3			1373	VeCad_DAPI_40x8bit_2016_11_07_siYap_2.tif	30			1373	Exp2_13317_DAPI_VeCad_Phalloidin_siYap_3.tif	54
																															1365	5			1374	VeCad_DAPI_40x8bit_2016_11_07_siYap_5.tif	73			1374	Exp2_13317_DAPI_VeCad_Phalloidin_siCTR_1.tif	12
																															1366	3			1375	VeCad_DAPI_40x8bit_2016_11_07_siYapTaz_3.tif	84			1375	Exp3_27217_DAPI_VeCad_Phalloidin_siYap_3.tif	38
																															1367	5			1376	VeCad_DAPI_40x8bit_2016_11_07_siYap_1.tif	15			1376	Exp3_27217_DAPI_VeCad_Phalloidin_siCTR_3.tif	30
																															1368	5			1377	VeCad_DAPI_40x8bit_2016_11_07_siTaz_4.tif	75			1377	Exp3_27217_DAPI_VeCad_Phalloidin_siYap_4.tif	24
																															1369	0			1378	VeCad_DAPI_40x8bit_2016_11_07_siYap_1.tif	46			1378	Exp3_27217_DAPI_VeCad_Phalloidin_siCTR_2.tif	37
																															1370	0			1379	VeCad_DAPI_40x8bit_2016_11_07_siYap_4.tif	52			1379	Exp2_13317_DAPI_VeCad_Phalloidin_siCTR_5.tif	81
																															1371	0			1380	VeCad_DAPI_40x8bit_2016_11_07_siYapTaz_4.tif	51			1380	Exp3_27217_DAPI_VeCad_Phalloidin_siYap_1.tif	90
																															1372	0			1381	VeCad_DAPI_40x8bit_2016_11_07_siYapTaz_3.tif	44			1381	Exp2_13317_DAPI_VeCad_Phalloidin_siYap_4.tif	75
																															1373	0			1382	VeCad_DAPI_40x8bit_2016_11_07_siYapTaz_4.tif	0			1382	Exp2_13317_DAPI_VeCad_Phalloidin_siYap_2.tif	2
																															1374	0			1383	VeCad_DAPI_40x8bit_2016_11_07_siCTR_5.tif	62			1383	Exp2_13317_DAPI_VeCad_Phalloidin_siYap_5.tif	26
																															1375	1			1384	VeCad_DAPI_40x8bit_2016_11_07_siYapTaz_4.tif	53			1384	Exp2_13317_DAPI_VeCad_Phalloidin_siTaz_3.tif	96
																															1376	3			1385	VeCad_DAPI_40x8bit_2016_11_07_siCTR_2.tif	50			1385	Exp3_27217_DAPI_VeCad_Phalloidin_siYap_2.tif	86
																															1377	1			1386	VeCad_DAPI_40x8bit_2016_11_07_siYapTaz_5.tif	76			1386	Exp3_27217_DAPI_VeCad_Phalloidin_siYapTaz_3.tif	79
																															1378	0			1387	VeCad_DAPI_40x8bit_2016_11_07_siTaz_5.tif	38			1387	Exp2_13317_DAPI_VeCad_Phalloidin_siYap_1.tif	37
																															1379	0			1388	VeCad_DAPI_40x8bit_2016_11_07_siYap_5.tif	63			1388	Exp2_13317_DAPI_VeCad_Phalloidin_siCTR_4.tif	99
																															1380	1			1389	VeCad_DAPI_40x8bit_2016_11_07_siYap_2.tif	58			1389	Exp2_13317_DAPI_VeCad_Phalloidin_siYapTaz_1.tif	60
																															1381	0			1390	VeCad_DAPI_40x8bit_2016_11_07_siYapTaz_4.tif	2			1390	Exp3_27217_DAPI_VeCad_Phalloidin_siCTR_3.tif	75
																															1382	1			1391	VeCad_DAPI_40x8bit_2016_11_07_siYap_4.tif	28			1391	Exp2_13317_DAPI_VeCad_Phalloidin_siTaz_3.tif	66
																															1383	0			1392	VeCad_DAPI_40x8bit_2016_11_07_siYapTaz_3.tif	20			1392	Exp2_13317_DAPI_VeCad_Phalloidin_siTaz_3.tif	69
																															1384	0			1393	VeCad_DAPI_40x8bit_2016_11_07_siCTR_3.tif	62			1393	Exp3_27217_DAPI_VeCad_Phalloidin_siCTR_3.tif	37
																															1385	1			1394	VeCad_DAPI_40x8bit_2016_11_07_siCTR_4.tif	53			1394	Exp2_13317_DAPI_VeCad_Phalloidin_siYap_4.tif	11
																															1386	1			1395	VeCad_DAPI_40x8bit_2016_11_07_siYap_3.tif	78			1395	Exp3_27217_DAPI_VeCad_Phalloidin_siCTR_5.tif	13
																															1387	3			1396	VeCad_DAPI_40x8bit_2016_11_07_siYap_4.tif	23			1396	Exp2_13317_DAPI_VeCad_Phalloidin_siCTR_5.tif	40
																															1388	0			1397	VeCad_DAPI_40x8bit_2016_11_07_siTaz_3.tif	1			1397	Exp3_27217_DAPI_VeCad_Phalloidin_siYapTaz_4.tif	0
																															1389	3			1398	VeCad_DAPI_40x8bit_2016_11_07_siYapTaz_5.tif	70			1398	Exp2_13317_DAPI_VeCad_Phalloidin_siYapTaz_4.tif	32
																															1390	3			1399	VeCad_DAPI_40x8bit_2016_11_07_siCTR_1.tif	46			1399	Exp3_27217_DAPI_VeCad_Phalloidin_siCTR_4.tif	8
																															1391	3			1400	VeCad_DAPI_40x8bit_2016_11_07_siTaz_2.tif	38			1400	Exp3_27217_DAPI_VeCad_Phalloidin_siYapTaz_3.tif	97
																															1392	2			1401	VeCad_DAPI_40x8bit_2016_11_07_siYapTaz_2.tif	78			1401	Exp2_13317_DAPI_VeCad_Phalloidin_siCTR_5.tif	53
																															1393	4			1402	VeCad_DAPI_40x8bit_2016_11_07_siYap_2.tif	57			1402	Exp2_13317_DAPI_VeCad_Phalloidin_siYapTaz_1.tif	78
																															1394	2			1403	VeCad_DAPI_40x8bit_2016_11_07_siYap_5.tif	79			1403	Exp2_13317_DAPI_VeCad_Phalloidin_siYap_2.tif	78
																															1395	1			1404	VeCad_DAPI_40x8bit_2016_11_07_siCTR_2.tif	22			1404	Exp3_27217_DAPI_VeCad_Phalloidin_siYap_5.tif	7
																															1396	1			1405	VeCad_DAPI_40x8bit_2016_11_07_siTaz_3.tif	97			1405	Exp3_27217_DAPI_VeCad_Phalloidin_siYap_1.tif	46
																															1397	0			1406	VeCad_DAPI_40x8bit_2016_11_07_siTaz_1.tif	50			1406	Exp2_13317_DAPI_VeCad_Phalloidin_siYapTaz_3.tif	99
																															1398	0			1407	VeCad_DAPI_40x8bit_2016_11_07_siTaz_1.tif	49			1407	Exp3_27217_DAPI_VeCad_Phalloidin_siYap_1.tif	62
																															1399	4			1408	VeCad_DAPI_40x8bit_2016_11_07_siYapTaz_2.tif	96			1408	Exp2_13317_DAPI_VeCad_Phalloidin_siTaz_4.tif	12
																															1400	0			1409	VeCad_DAPI_40x8bit_2016_11_07_siCTR_3.tif	1			1409	Exp2_13317_DAPI_VeCad_Phalloidin_siYap_1.tif	9
																															1401	0			1410	VeCad_DAPI_40x8bit_2016_11_07_siTaz_5.tif	3			1410	Exp3_27217_DAPI_VeCad_Phalloidin_siCTR_1.tif	43
																															1402	0			1411	VeCad_DAPI_40x8bit_2016_11_07_siCTR_3.tif	50			1411	Exp2_13317_DAPI_VeCad_Phalloidin_siTaz_2.tif	61
																															1403	1			1412	VeCad_DAPI_40x8bit_2016_11_07_siTaz_3.tif	50			1412	Exp2_13317_DAPI_VeCad_Phalloidin_siCTR_2.tif	72
																															1404	0			1413	VeCad_DAPI_40x8bit_2016_11_07_siYapTaz_3.tif	8			1413	Exp2_13317_DAPI_VeCad_Phalloidin_siTaz_3.tif	7
																															1405	1			1414	VeCad_DAPI_40x8bit_2016_11_07_siYap_1.tif	68			1414	Exp3_27217_DAPI_VeCad_Phalloidin_siYap_4.tif	27
																															1406	0			1415	VeCad_DAPI_40x8bit_2016_11_07_siYapTaz_4.tif	42			1415	Exp2_13317_DAPI_VeCad_Phalloidin_siYapTaz_1.tif	35
																															1407	0			1416	VeCad_DAPI_40x8bit_2016_11_07_siYapTaz_5.tif	53			1416	Exp3_27217_DAPI_VeCad_Phalloidin_siYap_4.tif	71
																															1408	2			1417	VeCad_DAPI_40x8bit_2016_11_07_siCTR_3.tif	2			1417	Exp2_13317_DAPI_VeCad_Phalloidin_siYapTaz_2.tif	28
																															1409	0			1418	VeCad_DAPI_40x8bit_2016_11_07_siYap_4.tif	24			1418	Exp3_27217_DAPI_VeCad_Phalloidin_siYap_4.tif	2
																															1410	2			1419	VeCad_DAPI_40x8bit_2016_11_07_siYap_5.tif	4			1419	Exp3_27217_DAPI_VeCad_Phalloidin_siYapTaz_3.tif	3
																															1411	0			1420	VeCad_DAPI_40x8bit_2016_11_07_siYap_1.tif	53			1420	Exp2_13317_DAPI_VeCad_Phalloidin_siCTR_3.tif	19
																															1412	3			1421	VeCad_DAPI_40x8bit_2016_11_07_siYap_3.tif	39			1421	Exp2_13317_DAPI_VeCad_Phalloidin_siYap_2.tif	17
																															1413	0			1422	VeCad_DAPI_40x8bit_2016_11_07_siTaz_4.tif	37			1422	Exp3_27217_DAPI_VeCad_Phalloidin_siYapTaz_4.tif	24
																															1414	0			1423	VeCad_DAPI_40x8bit_2016_11_07_siYap_4.tif	15			1423	Exp2_13317_DAPI_VeCad_Phalloidin_siYap_5.tif	32
																															1415	0			1424	VeCad_DAPI_40x8bit_2016_11_07_siYap_5.tif	57			1424	Exp3_27217_DAPI_VeCad_Phalloidin_siYapTaz_1.tif	78
																															1416	1			1425	VeCad_DAPI_40x8bit_2016_11_07_siYapTaz_3.tif	52			1425	Exp3_27217_DAPI_VeCad_Phalloidin_siYap_3.tif	70
																															1417	0			1426	VeCad_DAPI_40x8bit_2016_11_07_siYapTaz_4.tif	35			1426	Exp2_13317_DAPI_VeCad_Phalloidin_siYapTaz_1.tif	30
																															1418	1			1427	VeCad_DAPI_40x8bit_2016_11_07_siYapTaz_1.tif	59			1427	Exp3_27217_DAPI_VeCad_Phalloidin_siYap_1.tif	27
																															1419	0			1428	VeCad_DAPI_40x8bit_2016_11_07_siYap_2.tif	83			1428	Exp2_13317_DAPI_VeCad_Phalloidin_siYap_3.tif	56
																															1420	4			1429	VeCad_DAPI_40x8bit_2016_11_07_siYap_5.tif	66			1429	Exp2_13317_DAPI_VeCad_Phalloidin_siYapTaz_5.tif	15
																															1421	1			1430	VeCad_DAPI_40x8bit_2016_11_07_siCTR_3.tif	21			1430	Exp2_13317_DAPI_VeCad_Phalloidin_siTaz_3.tif	90
																															1422	0			1431	VeCad_DAPI_40x8bit_2016_11_07_siYap_4.tif	45			1431	Exp3_27217_DAPI_VeCad_Phalloidin_siCTR_1.tif	38
																															1423	1			1432	VeCad_DAPI_40x8bit_2016_11_07_siYap_2.tif	11			1432	Exp2_13317_DAPI_VeCad_Phalloidin_siCTR_4.tif	39
																															1424	1			1433	VeCad_DAPI_40x8bit_2016_11_07_siYap_2.tif	29			1433	Exp2_13317_DAPI_VeCad_Phalloidin_siYap_4.tif	33
																															1425	0			1434	VeCad_DAPI_40x8bit_2016_11_07_siYap_5.tif	89			1434	Exp2_13317_DAPI_VeCad_Phalloidin_siCTR_5.tif	41
																															1426	0			1435	VeCad_DAPI_40x8bit_2016_11_07_siTaz_3.tif	72			1435	Exp3_27217_DAPI_VeCad_Phalloidin_siYapTaz_1.tif	93
																															1427	0			1436	VeCad_DAPI_40x8bit_2016_11_07_siTaz_4.tif	94			1436	Exp2_13317_DAPI_VeCad_Phalloidin_siYapTaz_5.tif	94
																															1428	2			1437	VeCad_DAPI_40x8bit_2016_11_07_siYapTaz_2.tif	1			1437	Exp2_13317_DAPI_VeCad_Phalloidin_siYapTaz_1.tif	75
																															1429	0			1438	VeCad_DAPI_40x8bit_2016_11_07_siTaz_1.tif	76			1438	Exp3_27217_DAPI_VeCad_Phalloidin_siYapTaz_5.tif	56
																															1430	2			1439	VeCad_DAPI_40x8bit_2016_11_07_siCTR_5.tif	46			1439	Exp2_13317_DAPI_VeCad_Phalloidin_siYapTaz_1.tif	39
																															1431	2			1440	VeCad_DAPI_40x8bit_2016_11_07_siTaz_2.tif	12			1440	Exp3_27217_DAPI_VeCad_Phalloidin_siYap_4.tif	40
																															1432	0			1441	VeCad_DAPI_40x8bit_2016_11_07_siYapTaz_2.tif	11			1441	Exp2_13317_DAPI_VeCad_Phalloidin_siTaz_1.tif	85
																															1433	1			1442	VeCad_DAPI_40x8bit_2016_11_07_siYap_3.tif	68			1442	Exp2_13317_DAPI_VeCad_Phalloidin_siTaz_3.tif	80
																															1434	2			1443	VeCad_DAPI_40x8bit_2016_11_07_siTaz_1.tif	96			1443	Exp2_13317_DAPI_VeCad_Phalloidin_siCTR_2.tif	4
																															1435	0			1444	VeCad_DAPI_40x8bit_2016_11_07_siTaz_2.tif	71			1444	Exp3_27217_DAPI_VeCad_Phalloidin_siYap_1.tif	8
																															1436	5			1445	VeCad_DAPI_40x8bit_2016_11_07_siYap_1.tif	89			1445	Exp3_27217_DAPI_VeCad_Phalloidin_siYap_4.tif	81
																															1437	2			1446	VeCad_DAPI_40x8bit_2016_11_07_siYap_4.tif	9			1446	Exp2_13317_DAPI_VeCad_Phalloidin_siCTR_5.tif	4
																															1438	1			1447	VeCad_DAPI_40x8bit_2016_11_07_siCTR_4.tif	0			1447	Exp3_27217_DAPI_VeCad_Phalloidin_siYapTaz_5.tif	9
																															1439	4			1448	VeCad_DAPI_40x8bit_2016_11_07_siYapTaz_3.tif	33			1448	Exp2_13317_DAPI_VeCad_Phalloidin_siYapTaz_1.tif	94
																															1440	0			1449	VeCad_DAPI_40x8bit_2016_11_07_siYapTaz_5.tif	23			1449	Exp2_13317_DAPI_VeCad_Phalloidin_siYap_1.tif	65
																															1441	1			1450	VeCad_DAPI_40x8bit_2016_11_07_siTaz_5.tif	67			1450	Exp3_27217_DAPI_VeCad_Phalloidin_siYapTaz_5.tif	77
																															1442	1			1451	VeCad_DAPI_40x8bit_2016_11_07_siYap_5.tif	43			1451	Exp3_27217_DAPI_VeCad_Phalloidin_siYap_1.tif	56
																															1443	2			1452	VeCad_DAPI_40x8bit_2016_11_07_siTaz_1.tif	54			1452	Exp2_13317_DAPI_VeCad_Phalloidin_siTaz_4.tif	16
																															1444	1			1453	VeCad_DAPI_40x8bit_2016_11_07_siYapTaz_5.tif	27			1453	Exp2_13317_DAPI_VeCad_Phalloidin_siYap_5.tif	37
																															1445	0			1454	VeCad_DAPI_40x8bit_2016_11_07_siYapTaz_1.tif	4			1454	Exp3_27217_DAPI_VeCad_Phalloidin_siCTR_5.tif	15
																															1446	0			1455	VeCad_DAPI_40x8bit_2016_11_07_siYap_1.tif	85			1455	Exp3_27217_DAPI_VeCad_Phalloidin_siYapTaz_1.tif	72
																															1447	4			1456	VeCad_DAPI_40x8bit_2016_11_07_siCTR_4.tif	97			1456	Exp3_27217_DAPI_VeCad_Phalloidin_siYap_1.tif	51
																															1448	0			1457	VeCad_DAPI_40x8bit_2016_11_07_siYapTaz_1.tif	47			1457	Exp2_13317_DAPI_VeCad_Phalloidin_siYapTaz_1.tif	28
																															1449	2			1458	VeCad_DAPI_40x8bit_2016_11_07_siYap_1.tif	75			1458	Exp3_27217_DAPI_VeCad_Phalloidin_siYap_5.tif	16
																															1450	2			1459	VeCad_DAPI_40x8bit_2016_11_07_siYapTaz_5.tif	62			1459	Exp3_27217_DAPI_VeCad_Phalloidin_siCTR_5.tif	8
																															1451	1			1460	VeCad_DAPI_40x8bit_2016_11_07_siCTR_3.tif	11			1460	Exp2_13317_DAPI_VeCad_Phalloidin_siTaz_5.tif	95
																															1452	0			1461	VeCad_DAPI_40x8bit_2016_11_07_siCTR_4.tif	80			1461	Exp2_13317_DAPI_VeCad_Phalloidin_siTaz_4.tif	78
																															1453	0			1462	VeCad_DAPI_40x8bit_2016_11_07_siYapTaz_4.tif	71			1462	Exp3_27217_DAPI_VeCad_Phalloidin_siCTR_5.tif	42
																															1454	5			1463	VeCad_DAPI_40x8bit_2016_11_07_siTaz_3.tif	15			1463	Exp2_13317_DAPI_VeCad_Phalloidin_siTaz_1.tif	26
																															1455	0			1464	VeCad_DAPI_40x8bit_2016_11_07_siCTR_2.tif	24			1464	Exp3_27217_DAPI_VeCad_Phalloidin_siCTR_4.tif	96
																															1456	0			1465	VeCad_DAPI_40x8bit_2016_11_07_siYapTaz_4.tif	76			1465	Exp2_13317_DAPI_VeCad_Phalloidin_siYap_3.tif	53
																															1457	0			1466	VeCad_DAPI_40x8bit_2016_11_07_siCTR_4.tif	70			1466	Exp2_13317_DAPI_VeCad_Phalloidin_siYap_4.tif	87
																															1458	0			1467	VeCad_DAPI_40x8bit_2016_11_07_siYapTaz_3.tif	89			1467	Exp2_13317_DAPI_VeCad_Phalloidin_siYapTaz_3.tif	74
																															1459	3			1468	VeCad_DAPI_40x8bit_2016_11_07_siCTR_5.tif	29			1468	Exp2_13317_DAPI_VeCad_Phalloidin_siYap_4.tif	84
																															1460	0			1469	VeCad_DAPI_40x8bit_2016_11_07_siYapTaz_1.tif	20			1469	Exp2_13317_DAPI_VeCad_Phalloidin_siYapTaz_5.tif	27
																															1461	2			1470	VeCad_DAPI_40x8bit_2016_11_07_siCTR_3.tif	56			1470	Exp2_13317_DAPI_VeCad_Phalloidin_siTaz_4.tif	97
																															1462	4			1471	VeCad_DAPI_40x8bit_2016_11_07_siYap_1.tif	22			1471	Exp2_13317_DAPI_VeCad_Phalloidin_siYapTaz_1.tif	3
																															1463	1			1472	VeCad_DAPI_40x8bit_2016_11_07_siCTR_1.tif	17			1472	Exp2_13317_DAPI_VeCad_Phalloidin_siCTR_2.tif	46
																															1464	0			1473	VeCad_DAPI_40x8bit_2016_11_07_siYap_1.tif	87			1473	Exp2_13317_DAPI_VeCad_Phalloidin_siYap_4.tif	73
																															1465	0			1474	VeCad_DAPI_40x8bit_2016_11_07_siYap_5.tif	87			1474	Exp3_27217_DAPI_VeCad_Phalloidin_siYapTaz_4.tif	83
																															1466	0			1475	VeCad_DAPI_40x8bit_2016_11_07_siYapTaz_5.tif	75			1475	Exp2_13317_DAPI_VeCad_Phalloidin_siTaz_4.tif	58
																															1467	5			1476	VeCad_DAPI_40x8bit_2016_11_07_siCTR_5.tif	2			1476	Exp3_27217_DAPI_VeCad_Phalloidin_siYapTaz_2.tif	70
																															1468	1			1477	VeCad_DAPI_40x8bit_2016_11_07_siTaz_1.tif	88			1477	Exp2_13317_DAPI_VeCad_Phalloidin_siCTR_5.tif	11
																															1469	0			1478	VeCad_DAPI_40x8bit_2016_11_07_siTaz_2.tif	26			1478	Exp2_13317_DAPI_VeCad_Phalloidin_siYap_2.tif	38
																															1470	5			1479	VeCad_DAPI_40x8bit_2016_11_07_siCTR_5.tif	6			1479	Exp3_27217_DAPI_VeCad_Phalloidin_siYap_2.tif	65
																															1471	0			1480	VeCad_DAPI_40x8bit_2016_11_07_siCTR_1.tif	81			1480	Exp2_13317_DAPI_VeCad_Phalloidin_siYapTaz_1.tif	96
																															1472	3			1481	VeCad_DAPI_40x8bit_2016_11_07_siYap_2.tif	1			1481	Exp2_13317_DAPI_VeCad_Phalloidin_siYapTaz_2.tif	10
																															1473	2			1482	VeCad_DAPI_40x8bit_2016_11_07_siCTR_1.tif	48			1482	Exp2_13317_DAPI_VeCad_Phalloidin_siCTR_5.tif	59
																															1474	1			1483	VeCad_DAPI_40x8bit_2016_11_07_siCTR_3.tif	26			1483	Exp3_27217_DAPI_VeCad_Phalloidin_siCTR_2.tif	80
																															1475	2			1484	VeCad_DAPI_40x8bit_2016_11_07_siYap_5.tif	58			1484	Exp2_13317_DAPI_VeCad_Phalloidin_siYapTaz_3.tif	73
																															1476	0			1485	VeCad_DAPI_40x8bit_2016_11_07_siYapTaz_5.tif	85			1485	Exp2_13317_DAPI_VeCad_Phalloidin_siYap_1.tif	24
																															1477	1			1486	VeCad_DAPI_40x8bit_2016_11_07_siCTR_1.tif	76			1486	Exp3_27217_DAPI_VeCad_Phalloidin_siYap_5.tif	5
																															1478	0			1487	VeCad_DAPI_40x8bit_2016_11_07_siYap_4.tif	35			1487	Exp3_27217_DAPI_VeCad_Phalloidin_siCTR_4.tif	53
																															1479	1			1488	VeCad_DAPI_40x8bit_2016_11_07_siYapTaz_1.tif	68			1488	Exp2_13317_DAPI_VeCad_Phalloidin_siYap_2.tif	13
																															1480	1			1489	VeCad_DAPI_40x8bit_2016_11_07_siTaz_4.tif	57			1489	Exp2_13317_DAPI_VeCad_Phalloidin_siTaz_2.tif	18
																															1481	0			1490	VeCad_DAPI_40x8bit_2016_11_07_siCTR_3.tif	80			1490	Exp3_27217_DAPI_VeCad_Phalloidin_siYap_4.tif	50
																															1482	1			1491	VeCad_DAPI_40x8bit_2016_11_07_siCTR_4.tif	78			1491	Exp2_13317_DAPI_VeCad_Phalloidin_siYapTaz_3.tif	87
																															1483	2			1492	VeCad_DAPI_40x8bit_2016_11_07_siYap_5.tif	59			1492	Exp2_13317_DAPI_VeCad_Phalloidin_siCTR_2.tif	16
																															1484	0			1493	VeCad_DAPI_40x8bit_2016_11_07_siCTR_5.tif	52			1493	Exp2_13317_DAPI_VeCad_Phalloidin_siTaz_5.tif	21
																															1485	0			1494	VeCad_DAPI_40x8bit_2016_11_07_siYap_5.tif	98			1494	Exp2_13317_DAPI_VeCad_Phalloidin_siCTR_5.tif	30
																															1486	1			1495	VeCad_DAPI_40x8bit_2016_11_07_siTaz_4.tif	17			1495	Exp2_13317_DAPI_VeCad_Phalloidin_siYap_3.tif	19
																															1487	4			1496	VeCad_DAPI_40x8bit_2016_11_07_siTaz_2.tif	6			1496	Exp2_13317_DAPI_VeCad_Phalloidin_siTaz_5.tif	92
																															1488	1			1497	VeCad_DAPI_40x8bit_2016_11_07_siCTR_3.tif	14			1497	Exp2_13317_DAPI_VeCad_Phalloidin_siTaz_1.tif	28
																															1489	4			1498	VeCad_DAPI_40x8bit_2016_11_07_siTaz_4.tif	22			1498	Exp2_13317_DAPI_VeCad_Phalloidin_siTaz_5.tif	85
																															1490	1			1499	VeCad_DAPI_40x8bit_2016_11_07_siYap_4.tif	58			1499	Exp3_27217_DAPI_VeCad_Phalloidin_siYap_2.tif	11
																															1491	0			1500	VeCad_DAPI_40x8bit_2016_11_07_siYapTaz_4.tif	57			1500	Exp3_27217_DAPI_VeCad_Phalloidin_siCTR_4.tif	26
																															1492	5			1501	VeCad_DAPI_40x8bit_2016_11_07_siYap_4.tif	25			1501	Exp3_27217_DAPI_VeCad_Phalloidin_siYapTaz_3.tif	61
																															1493	0			1502	VeCad_DAPI_40x8bit_2016_11_07_siYap_4.tif	68			1502	Exp2_13317_DAPI_VeCad_Phalloidin_siYap_3.tif	73
																															1494	4			1503	VeCad_DAPI_40x8bit_2016_11_07_siYapTaz_1.tif	85			1503	Exp2_13317_DAPI_VeCad_Phalloidin_siCTR_4.tif	12
																															1495	1			1504	VeCad_DAPI_40x8bit_2016_11_07_siYapTaz_2.tif	74			1504	Exp2_13317_DAPI_VeCad_Phalloidin_siYapTaz_5.tif	14
																															1496	0			1505	VeCad_DAPI_40x8bit_2016_11_07_siTaz_4.tif	74			1505	Exp2_13317_DAPI_VeCad_Phalloidin_siYapTaz_4.tif	24
																															1497	2			1506	VeCad_DAPI_40x8bit_2016_11_07_siTaz_4.tif	73			1506	Exp3_27217_DAPI_VeCad_Phalloidin_siCTR_2.tif	83
																															1498	0			1507	VeCad_DAPI_40x8bit_2016_11_07_siCTR_1.tif	57			1507	Exp2_13317_DAPI_VeCad_Phalloidin_siYapTaz_5.tif	26
																															1499	2			1508	VeCad_DAPI_40x8bit_2016_11_07_siCTR_2.tif	40			1508	Exp2_13317_DAPI_VeCad_Phalloidin_siTaz_2.tif	46
																															1500	1			1509	VeCad_DAPI_40x8bit_2016_11_07_siYap_5.tif	20			1509	Exp3_27217_DAPI_VeCad_Phalloidin_siCTR_1.tif	1
																															1501	1			1510	VeCad_DAPI_40x8bit_2016_11_07_siTaz_1.tif	70			1510	Exp2_13317_DAPI_VeCad_Phalloidin_siYap_2.tif	23
																															1502	1			1511	VeCad_DAPI_40x8bit_2016_11_07_siYapTaz_2.tif	7			1511	Exp2_13317_DAPI_VeCad_Phalloidin_siYapTaz_1.tif	50
																															1503	4			1512	VeCad_DAPI_40x8bit_2016_11_07_siCTR_1.tif	35			1512	Exp2_13317_DAPI_VeCad_Phalloidin_siYapTaz_1.tif	65
																															1504	0			1513	VeCad_DAPI_40x8bit_2016_11_07_siTaz_2.tif	70			1513	Exp3_27217_DAPI_VeCad_Phalloidin_siYap_2.tif	40
																															1505	0			1514	VeCad_DAPI_40x8bit_2016_11_07_siTaz_5.tif	10			1514	Exp2_13317_DAPI_VeCad_Phalloidin_siCTR_1.tif	10
																															1506	4			1515	VeCad_DAPI_40x8bit_2016_11_07_siYap_4.tif	18			1515	Exp3_27217_DAPI_VeCad_Phalloidin_siYapTaz_5.tif	74
																															1507	0			1516	VeCad_DAPI_40x8bit_2016_11_07_siYapTaz_5.tif	77			1516	Exp3_27217_DAPI_VeCad_Phalloidin_siCTR_2.tif	23
																															1508	0			1517	VeCad_DAPI_40x8bit_2016_11_07_siCTR_5.tif	53			1517	Exp2_13317_DAPI_VeCad_Phalloidin_siYap_3.tif	30
																															1509	4			1518	VeCad_DAPI_40x8bit_2016_11_07_siYap_4.tif	54			1518	Exp2_13317_DAPI_VeCad_Phalloidin_siYapTaz_5.tif	8
																															1510	1			1519	VeCad_DAPI_40x8bit_2016_11_07_siYap_3.tif	2			1519	Exp2_13317_DAPI_VeCad_Phalloidin_siYap_4.tif	92
																															1511	5			1520	VeCad_DAPI_40x8bit_2016_11_07_siYapTaz_3.tif	38			1520	Exp2_13317_DAPI_VeCad_Phalloidin_siYapTaz_3.tif	61
																															1512	4			1521	VeCad_DAPI_40x8bit_2016_11_07_siYap_3.tif	18			1521	Exp2_13317_DAPI_VeCad_Phalloidin_siCTR_2.tif	21
																															1513	0			1522	VeCad_DAPI_40x8bit_2016_11_07_siCTR_4.tif	12			1522	Exp2_13317_DAPI_VeCad_Phalloidin_siTaz_4.tif	49
																															1514	0			1523	VeCad_DAPI_40x8bit_2016_11_07_siTaz_4.tif	26			1523	Exp2_13317_DAPI_VeCad_Phalloidin_siYapTaz_5.tif	72
																															1515	0			1524	VeCad_DAPI_40x8bit_2016_11_07_siCTR_3.tif	17			1524	Exp2_13317_DAPI_VeCad_Phalloidin_siCTR_1.tif	70
																															1516	3			1525	VeCad_DAPI_40x8bit_2016_11_07_siTaz_5.tif	90			1525	Exp2_13317_DAPI_VeCad_Phalloidin_siYap_1.tif	93
																															1517	1			1526	VeCad_DAPI_40x8bit_2016_11_07_siTaz_4.tif	5			1526	Exp3_27217_DAPI_VeCad_Phalloidin_siCTR_2.tif	52
																															1518	1			1527	VeCad_DAPI_40x8bit_2016_11_07_siYapTaz_3.tif	24			1527	Exp3_27217_DAPI_VeCad_Phalloidin_siCTR_4.tif	75
																															1519	4			1528	VeCad_DAPI_40x8bit_2016_11_07_siYapTaz_4.tif	34			1528	Exp3_27217_DAPI_VeCad_Phalloidin_siYapTaz_5.tif	95
																															1520	1			1529	VeCad_DAPI_40x8bit_2016_11_07_siYapTaz_4.tif	64			1529	Exp3_27217_DAPI_VeCad_Phalloidin_siYap_3.tif	58
																															1521	0			1530	VeCad_DAPI_40x8bit_2016_11_07_siCTR_3.tif	48			1530	Exp3_27217_DAPI_VeCad_Phalloidin_siYap_1.tif	72
																															1522	0			1531	VeCad_DAPI_40x8bit_2016_11_07_siYapTaz_3.tif	54			1531	Exp3_27217_DAPI_VeCad_Phalloidin_siCTR_2.tif	16
																															1523	0			1532	VeCad_DAPI_40x8bit_2016_11_07_siYapTaz_1.tif	62			1532	Exp2_13317_DAPI_VeCad_Phalloidin_siCTR_4.tif	25
																															1524	0			1533	VeCad_DAPI_40x8bit_2016_11_07_siYapTaz_3.tif	60			1533	Exp3_27217_DAPI_VeCad_Phalloidin_siCTR_4.tif	42
																															1525	1			1534	VeCad_DAPI_40x8bit_2016_11_07_siYapTaz_1.tif	92			1534	Exp3_27217_DAPI_VeCad_Phalloidin_siYapTaz_5.tif	41
																															1526	3			1535	VeCad_DAPI_40x8bit_2016_11_07_siYapTaz_3.tif	31			1535	Exp2_13317_DAPI_VeCad_Phalloidin_siYapTaz_3.tif	90
																															1527	4			1536	VeCad_DAPI_40x8bit_2016_11_07_siCTR_4.tif	81			1536	Exp2_13317_DAPI_VeCad_Phalloidin_siYap_2.tif	85
																															1528	1			1537	VeCad_DAPI_40x8bit_2016_11_07_siYap_5.tif	47			1537	Exp2_13317_DAPI_VeCad_Phalloidin_siCTR_3.tif	73
																															1529	1			1538	VeCad_DAPI_40x8bit_2016_11_07_siYap_5.tif	21			1538	Exp2_13317_DAPI_VeCad_Phalloidin_siTaz_4.tif	19
																															1530	1			1539	VeCad_DAPI_40x8bit_2016_11_07_siTaz_5.tif	48			1539	Exp2_13317_DAPI_VeCad_Phalloidin_siYapTaz_3.tif	72
																															1531	0			1540	VeCad_DAPI_40x8bit_2016_11_07_siYapTaz_3.tif	19			1540	Exp2_13317_DAPI_VeCad_Phalloidin_siTaz_1.tif	71
																															1532	1			1541	VeCad_DAPI_40x8bit_2016_11_07_siCTR_4.tif	48			1541	Exp3_27217_DAPI_VeCad_Phalloidin_siYapTaz_1.tif	5
																															1533	1			1542	VeCad_DAPI_40x8bit_2016_11_07_siYapTaz_1.tif	50			1542	Exp2_13317_DAPI_VeCad_Phalloidin_siYapTaz_4.tif	77
																															1534	2			1543	VeCad_DAPI_40x8bit_2016_11_07_siCTR_2.tif	47			1543	Exp3_27217_DAPI_VeCad_Phalloidin_siCTR_3.tif	34
																															1535	5			1544	VeCad_DAPI_40x8bit_2016_11_07_siYapTaz_3.tif	12			1544	Exp2_13317_DAPI_VeCad_Phalloidin_siTaz_4.tif	84
																															1536	1			1545	VeCad_DAPI_40x8bit_2016_11_07_siYapTaz_3.tif	95			1545	Exp2_13317_DAPI_VeCad_Phalloidin_siTaz_1.tif	90
																															1537	4			1546	VeCad_DAPI_40x8bit_2016_11_07_siYap_1.tif	80			1546	Exp2_13317_DAPI_VeCad_Phalloidin_siYapTaz_4.tif	88
																															1538	0			1547	VeCad_DAPI_40x8bit_2016_11_07_siYap_3.tif	51			1547	Exp2_13317_DAPI_VeCad_Phalloidin_siYapTaz_4.tif	92
																															1539	5			1548	VeCad_DAPI_40x8bit_2016_11_07_siTaz_4.tif	60			1548	Exp2_13317_DAPI_VeCad_Phalloidin_siYapTaz_1.tif	95
																															1540	2			1549	VeCad_DAPI_40x8bit_2016_11_07_siYap_3.tif	7			1549	Exp3_27217_DAPI_VeCad_Phalloidin_siYap_5.tif	64
																															1541	0			1550	VeCad_DAPI_40x8bit_2016_11_07_siCTR_4.tif	32			1550	Exp2_13317_DAPI_VeCad_Phalloidin_siYapTaz_3.tif	5
																															1542	1			1551	VeCad_DAPI_40x8bit_2016_11_07_siYap_3.tif	13			1551	Exp2_13317_DAPI_VeCad_Phalloidin_siYapTaz_2.tif	41
																															1543	3			1552	VeCad_DAPI_40x8bit_2016_11_07_siCTR_4.tif	2			1552	Exp3_27217_DAPI_VeCad_Phalloidin_siYap_4.tif	37
																															1544	0			1553	VeCad_DAPI_40x8bit_2016_11_07_siCTR_3.tif	25			1553	Exp3_27217_DAPI_VeCad_Phalloidin_siCTR_3.tif	21
																															1545	0			1554	VeCad_DAPI_40x8bit_2016_11_07_siYapTaz_1.tif	60			1554	Exp2_13317_DAPI_VeCad_Phalloidin_siCTR_5.tif	61
																															1546	0			1555	VeCad_DAPI_40x8bit_2016_11_07_siCTR_3.tif	29			1555	Exp3_27217_DAPI_VeCad_Phalloidin_siYap_1.tif	54
																															1547	0			1556	VeCad_DAPI_40x8bit_2016_11_07_siCTR_5.tif	73			1556	Exp2_13317_DAPI_VeCad_Phalloidin_siYapTaz_3.tif	50
																															1548	1			1557	VeCad_DAPI_40x8bit_2016_11_07_siTaz_3.tif	52			1557	Exp2_13317_DAPI_VeCad_Phalloidin_siYapTaz_2.tif	74
																															1549	0			1558	VeCad_DAPI_40x8bit_2016_11_07_siYap_2.tif	32			1558	Exp2_13317_DAPI_VeCad_Phalloidin_siCTR_2.tif	0
																															1550	3			1559	VeCad_DAPI_40x8bit_2016_11_07_siCTR_3.tif	3			1559	Exp2_13317_DAPI_VeCad_Phalloidin_siTaz_4.tif	73
																															1551	0			1560	VeCad_DAPI_40x8bit_2016_11_07_siYap_1.tif	93			1560	Exp2_13317_DAPI_VeCad_Phalloidin_siYap_3.tif	93
																															1552	0			1561	VeCad_DAPI_40x8bit_2016_11_07_siTaz_4.tif	19			1561	Exp3_27217_DAPI_VeCad_Phalloidin_siCTR_5.tif	47
																															1553	3			1562	VeCad_DAPI_40x8bit_2016_11_07_siYap_4.tif	90			1562	Exp2_13317_DAPI_VeCad_Phalloidin_siCTR_1.tif	79
																															1554	0			1563	VeCad_DAPI_40x8bit_2016_11_07_siTaz_3.tif	66			1563	Exp3_27217_DAPI_VeCad_Phalloidin_siYap_3.tif	28
																															1555	0			1564	VeCad_DAPI_40x8bit_2016_11_07_siCTR_1.tif	91			1564	Exp3_27217_DAPI_VeCad_Phalloidin_siYap_4.tif	16
																															1556	1			1565	VeCad_DAPI_40x8bit_2016_11_07_siYapTaz_1.tif	81			1565	Exp3_27217_DAPI_VeCad_Phalloidin_siYap_1.tif	92
																															1557	0			1566	VeCad_DAPI_40x8bit_2016_11_07_siYap_3.tif	21			1566	Exp2_13317_DAPI_VeCad_Phalloidin_siTaz_5.tif	97
																															1558	2			1567	VeCad_DAPI_40x8bit_2016_11_07_siTaz_5.tif	87			1567	Exp3_27217_DAPI_VeCad_Phalloidin_siYap_3.tif	17
																															1559	2			1568	VeCad_DAPI_40x8bit_2016_11_07_siYapTaz_5.tif	86			1568	Exp2_13317_DAPI_VeCad_Phalloidin_siYapTaz_3.tif	69
																															1560	0			1569	VeCad_DAPI_40x8bit_2016_11_07_siYap_4.tif	22			1569	Exp3_27217_DAPI_VeCad_Phalloidin_siYap_1.tif	10
																															1561	4			1570	VeCad_DAPI_40x8bit_2016_11_07_siCTR_1.tif	5			1570	Exp3_27217_DAPI_VeCad_Phalloidin_siCTR_3.tif	81
																															1562	2			1571	VeCad_DAPI_40x8bit_2016_11_07_siYap_3.tif	61			1571	Exp2_13317_DAPI_VeCad_Phalloidin_siYap_4.tif	0
																															1563	0			1572	VeCad_DAPI_40x8bit_2016_11_07_siCTR_2.tif	69			1572	Exp3_27217_DAPI_VeCad_Phalloidin_siYap_1.tif	2
																															1564	0			1573	VeCad_DAPI_40x8bit_2016_11_07_siTaz_1.tif	35			1573	Exp2_13317_DAPI_VeCad_Phalloidin_siCTR_1.tif	76
																															1565	0			1574	VeCad_DAPI_40x8bit_2016_11_07_siTaz_3.tif	36			1574	Exp3_27217_DAPI_VeCad_Phalloidin_siCTR_1.tif	91
																															1566	5			1575	VeCad_DAPI_40x8bit_2016_11_07_siCTR_4.tif	61			1575	Exp3_27217_DAPI_VeCad_Phalloidin_siCTR_4.tif	54
																															1567	0			1576	VeCad_DAPI_40x8bit_2016_11_07_siTaz_1.tif	72			1576	Exp2_13317_DAPI_VeCad_Phalloidin_siYapTaz_3.tif	83
																															1568	0			1577	VeCad_DAPI_40x8bit_2016_11_07_siCTR_4.tif	30			1577	Exp2_13317_DAPI_VeCad_Phalloidin_siYapTaz_3.tif	81
																															1569	0			1578	VeCad_DAPI_40x8bit_2016_11_07_siTaz_4.tif	53			1578	Exp3_27217_DAPI_VeCad_Phalloidin_siYap_1.tif	63
																															1570	0			1579	VeCad_DAPI_40x8bit_2016_11_07_siYap_3.tif	63			1579	Exp2_13317_DAPI_VeCad_Phalloidin_siYap_5.tif	90
																															1571	0			1580	VeCad_DAPI_40x8bit_2016_11_07_siCTR_4.tif	6			1580	Exp2_13317_DAPI_VeCad_Phalloidin_siTaz_1.tif	74
																															1572	0			1581	VeCad_DAPI_40x8bit_2016_11_07_siTaz_2.tif	37			1581	Exp3_27217_DAPI_VeCad_Phalloidin_siYapTaz_2.tif	54
																															1573	0			1582	VeCad_DAPI_40x8bit_2016_11_07_siCTR_1.tif	49			1582	Exp2_13317_DAPI_VeCad_Phalloidin_siYapTaz_5.tif	18
																															1574	4			1583	VeCad_DAPI_40x8bit_2016_11_07_siCTR_4.tif	13			1583	Exp2_13317_DAPI_VeCad_Phalloidin_siYapTaz_1.tif	20
																															1575	1			1584	VeCad_DAPI_40x8bit_2016_11_07_siYapTaz_3.tif	67			1584	Exp2_13317_DAPI_VeCad_Phalloidin_siYapTaz_4.tif	61
																															1576	0			1585	VeCad_DAPI_40x8bit_2016_11_07_siTaz_2.tif	32			1585	Exp2_13317_DAPI_VeCad_Phalloidin_siYap_3.tif	39
																															1577	0			1586	VeCad_DAPI_40x8bit_2016_11_07_siTaz_3.tif	69			1586	Exp2_13317_DAPI_VeCad_Phalloidin_siYap_5.tif	75
																															1578	0			1587	VeCad_DAPI_40x8bit_2016_11_07_siYap_3.tif	55			1587	Exp2_13317_DAPI_VeCad_Phalloidin_siYapTaz_3.tif	26
																															1579	0			1588	VeCad_DAPI_40x8bit_2016_11_07_siCTR_4.tif	31			1588	Exp3_27217_DAPI_VeCad_Phalloidin_siYapTaz_1.tif	65
																															1580	0			1589	VeCad_DAPI_40x8bit_2016_11_07_siYapTaz_5.tif	3			1589	Exp2_13317_DAPI_VeCad_Phalloidin_siTaz_1.tif	81
																															1581	4			1590	VeCad_DAPI_40x8bit_2016_11_07_siYapTaz_4.tif	22			1590	Exp3_27217_DAPI_VeCad_Phalloidin_siYapTaz_2.tif	47
																															1582	1			1591	VeCad_DAPI_40x8bit_2016_11_07_siYap_3.tif	54			1591	Exp2_13317_DAPI_VeCad_Phalloidin_siTaz_4.tif	46
																															1583	2			1592	VeCad_DAPI_40x8bit_2016_11_07_siCTR_4.tif	63			1592	Exp2_13317_DAPI_VeCad_Phalloidin_siTaz_1.tif	36
																															1584	3			1593	VeCad_DAPI_40x8bit_2016_11_07_siCTR_2.tif	99			1593	Exp3_27217_DAPI_VeCad_Phalloidin_siYap_4.tif	99
																															1585	4			1594	VeCad_DAPI_40x8bit_2016_11_07_siYapTaz_5.tif	20			1594	Exp2_13317_DAPI_VeCad_Phalloidin_siYap_5.tif	31
																															1586	1			1595	VeCad_DAPI_40x8bit_2016_11_07_siYap_5.tif	46			1595	Exp2_13317_DAPI_VeCad_Phalloidin_siTaz_4.tif	29
																															1587	0			1596	VeCad_DAPI_40x8bit_2016_11_07_siCTR_3.tif	40			1596	Exp2_13317_DAPI_VeCad_Phalloidin_siCTR_5.tif	8
																															1588	2			1597	VeCad_DAPI_40x8bit_2016_11_07_siYapTaz_5.tif	5			1597	Exp3_27217_DAPI_VeCad_Phalloidin_siYap_4.tif	85
																															1589	1			1598	VeCad_DAPI_40x8bit_2016_11_07_siYapTaz_4.tif	81			1598	Exp2_13317_DAPI_VeCad_Phalloidin_siTaz_3.tif	10
																															1590	0			1599	VeCad_DAPI_40x8bit_2016_11_07_siTaz_2.tif	16			1599	Exp3_27217_DAPI_VeCad_Phalloidin_siYap_5.tif	95
																															1591	3			1600	VeCad_DAPI_40x8bit_2016_11_07_siTaz_2.tif	63			1600	Exp2_13317_DAPI_VeCad_Phalloidin_siTaz_5.tif	59
																															1592	3			1601	VeCad_DAPI_40x8bit_2016_11_07_siTaz_1.tif	38			1601	Exp2_13317_DAPI_VeCad_Phalloidin_siCTR_1.tif	28
																															1593	1			1602	VeCad_DAPI_40x8bit_2016_11_07_siCTR_5.tif	28			1602	Exp3_27217_DAPI_VeCad_Phalloidin_siYapTaz_4.tif	99
																															1594	1			1603	VeCad_DAPI_40x8bit_2016_11_07_siYap_3.tif	37			1603	Exp2_13317_DAPI_VeCad_Phalloidin_siYapTaz_5.tif	51
																															1595	1			1604	VeCad_DAPI_40x8bit_2016_11_07_siYap_4.tif	77			1604	Exp2_13317_DAPI_VeCad_Phalloidin_siYapTaz_5.tif	61
																															1596	0			1605	VeCad_DAPI_40x8bit_2016_11_07_siTaz_2.tif	29			1605	Exp3_27217_DAPI_VeCad_Phalloidin_siYap_4.tif	73
																															1597	0			1606	VeCad_DAPI_40x8bit_2016_11_07_siTaz_3.tif	82			1606	Exp3_27217_DAPI_VeCad_Phalloidin_siYapTaz_4.tif	67
																															1598	2			1607	VeCad_DAPI_40x8bit_2016_11_07_siTaz_5.tif	73			1607	Exp2_13317_DAPI_VeCad_Phalloidin_siTaz_5.tif	91
																															1599	1			1608	VeCad_DAPI_40x8bit_2016_11_07_siCTR_2.tif	63			1608	Exp2_13317_DAPI_VeCad_Phalloidin_siCTR_2.tif	24
																															1600	3			1609	VeCad_DAPI_40x8bit_2016_11_07_siTaz_2.tif	39			1609	Exp3_27217_DAPI_VeCad_Phalloidin_siYapTaz_4.tif	27
																															1601	1			1610	VeCad_DAPI_40x8bit_2016_11_07_siYap_2.tif	77			1610	Exp2_13317_DAPI_VeCad_Phalloidin_siYap_2.tif	49
																															1602	1			1611	VeCad_DAPI_40x8bit_2016_11_07_siYapTaz_5.tif	1			1611	Exp3_27217_DAPI_VeCad_Phalloidin_siCTR_3.tif	91
																															1603	3			1612	VeCad_DAPI_40x8bit_2016_11_07_siYapTaz_4.tif	25			1612	Exp2_13317_DAPI_VeCad_Phalloidin_siTaz_1.tif	53
																															1604	5			1613	VeCad_DAPI_40x8bit_2016_11_07_siYapTaz_3.tif	7			1613	Exp2_13317_DAPI_VeCad_Phalloidin_siTaz_3.tif	87
																															1605	1			1614	VeCad_DAPI_40x8bit_2016_11_07_siTaz_4.tif	31			1614	Exp2_13317_DAPI_VeCad_Phalloidin_siYapTaz_4.tif	9
																															1606	0			1615	VeCad_DAPI_40x8bit_2016_11_07_siCTR_3.tif	46			1615	Exp2_13317_DAPI_VeCad_Phalloidin_siTaz_2.tif	30
																															1607	4			1616	VeCad_DAPI_40x8bit_2016_11_07_siYap_3.tif	16			1616	Exp2_13317_DAPI_VeCad_Phalloidin_siYapTaz_2.tif	87
																															1608	3			1617	VeCad_DAPI_40x8bit_2016_11_07_siYapTaz_2.tif	47			1617	Exp3_27217_DAPI_VeCad_Phalloidin_siYap_4.tif	72
																															1609	0			1618	VeCad_DAPI_40x8bit_2016_11_07_siTaz_3.tif	21			1618	Exp2_13317_DAPI_VeCad_Phalloidin_siYapTaz_2.tif	56
																															1610	1			1619	VeCad_DAPI_40x8bit_2016_11_07_siYap_2.tif	72			1619	Exp2_13317_DAPI_VeCad_Phalloidin_siTaz_5.tif	10
																															1611	4			1620	VeCad_DAPI_40x8bit_2016_11_07_siYap_1.tif	60			1620	Exp3_27217_DAPI_VeCad_Phalloidin_siYap_2.tif	91
																															1612	3			1621	VeCad_DAPI_40x8bit_2016_11_07_siTaz_3.tif	24			1621	Exp3_27217_DAPI_VeCad_Phalloidin_siCTR_5.tif	90
																															1613	2			1622	VeCad_DAPI_40x8bit_2016_11_07_siCTR_5.tif	9			1622	Exp3_27217_DAPI_VeCad_Phalloidin_siCTR_2.tif	53
																															1614	0			1623	VeCad_DAPI_40x8bit_2016_11_07_siYap_1.tif	13			1623	Exp2_13317_DAPI_VeCad_Phalloidin_siYap_2.tif	56
																															1615	4			1624	VeCad_DAPI_40x8bit_2016_11_07_siCTR_2.tif	9			1624	Exp3_27217_DAPI_VeCad_Phalloidin_siYapTaz_4.tif	66
																															1616	5			1625	VeCad_DAPI_40x8bit_2016_11_07_siTaz_1.tif	62			1625	Exp2_13317_DAPI_VeCad_Phalloidin_siCTR_3.tif	92
																															1617	1			1626	VeCad_DAPI_40x8bit_2016_11_07_siCTR_4.tif	47			1626	Exp3_27217_DAPI_VeCad_Phalloidin_siCTR_1.tif	55
																															1618	1			1627	VeCad_DAPI_40x8bit_2016_11_07_siYap_1.tif	98			1627	Exp3_27217_DAPI_VeCad_Phalloidin_siYap_4.tif	35
																															1619	0			1628	VeCad_DAPI_40x8bit_2016_11_07_siYapTaz_1.tif	1			1628	Exp3_27217_DAPI_VeCad_Phalloidin_siYapTaz_5.tif	29
																															1620	1			1629	VeCad_DAPI_40x8bit_2016_11_07_siYapTaz_5.tif	74			1629	Exp3_27217_DAPI_VeCad_Phalloidin_siYap_3.tif	82
																															1621	1			1630	VeCad_DAPI_40x8bit_2016_11_07_siYap_3.tif	42			1630	Exp2_13317_DAPI_VeCad_Phalloidin_siTaz_3.tif	88
																															1622	5			1631	VeCad_DAPI_40x8bit_2016_11_07_siYap_5.tif	14			1631	Exp3_27217_DAPI_VeCad_Phalloidin_siCTR_3.tif	55
																															1623	0			1632	VeCad_DAPI_40x8bit_2016_11_07_siYapTaz_3.tif	72			1632	Exp2_13317_DAPI_VeCad_Phalloidin_siYapTaz_2.tif	66
																															1624	5			1633	VeCad_DAPI_40x8bit_2016_11_07_siCTR_3.tif	33			1633	Exp3_27217_DAPI_VeCad_Phalloidin_siCTR_1.tif	81
																															1625	3			1634	VeCad_DAPI_40x8bit_2016_11_07_siYapTaz_1.tif	12			1634	Exp2_13317_DAPI_VeCad_Phalloidin_siCTR_3.tif	2
																															1626	0			1635	VeCad_DAPI_40x8bit_2016_11_07_siYap_5.tif	76			1635	Exp3_27217_DAPI_VeCad_Phalloidin_siCTR_3.tif	10
																															1627	1			1636	VeCad_DAPI_40x8bit_2016_11_07_siYapTaz_1.tif	32			1636	Exp3_27217_DAPI_VeCad_Phalloidin_siYapTaz_5.tif	82
																															1628	2			1637	VeCad_DAPI_40x8bit_2016_11_07_siYapTaz_4.tif	3			1637	Exp2_13317_DAPI_VeCad_Phalloidin_siYap_2.tif	92
																															1629	1			1638	VeCad_DAPI_40x8bit_2016_11_07_siTaz_3.tif	16			1638	Exp2_13317_DAPI_VeCad_Phalloidin_siYapTaz_3.tif	52
																															1630	5			1639	VeCad_DAPI_40x8bit_2016_11_07_siYap_1.tif	5			1639	Exp2_13317_DAPI_VeCad_Phalloidin_siYapTaz_4.tif	33
																															1631	4			1640	VeCad_DAPI_40x8bit_2016_11_07_siYapTaz_2.tif	97			1640	Exp3_27217_DAPI_VeCad_Phalloidin_siYap_5.tif	67
																															1632	3			1641	VeCad_DAPI_40x8bit_2016_11_07_siYapTaz_5.tif	9			1641	Exp2_13317_DAPI_VeCad_Phalloidin_siTaz_3.tif	58
																															1633	0			1642	VeCad_DAPI_40x8bit_2016_11_07_siYap_3.tif	6			1642	Exp3_27217_DAPI_VeCad_Phalloidin_siYapTaz_2.tif	13
																															1634	5			1643	VeCad_DAPI_40x8bit_2016_11_07_siCTR_3.tif	43			1643	Exp2_13317_DAPI_VeCad_Phalloidin_siYap_4.tif	26
																															1635	2			1644	VeCad_DAPI_40x8bit_2016_11_07_siCTR_4.tif	43			1644	Exp2_13317_DAPI_VeCad_Phalloidin_siTaz_2.tif	29
																															1636	1			1645	VeCad_DAPI_40x8bit_2016_11_07_siTaz_1.tif	21			1645	Exp2_13317_DAPI_VeCad_Phalloidin_siTaz_4.tif	79
																															1637	1			1646	VeCad_DAPI_40x8bit_2016_11_07_siYapTaz_2.tif	21			1646	Exp2_13317_DAPI_VeCad_Phalloidin_siYapTaz_2.tif	17
																															1638	0			1647	VeCad_DAPI_40x8bit_2016_11_07_siTaz_3.tif	64			1647	Exp2_13317_DAPI_VeCad_Phalloidin_siYapTaz_2.tif	43
																															1639	0			1648	VeCad_DAPI_40x8bit_2016_11_07_siTaz_5.tif	7			1648	Exp2_13317_DAPI_VeCad_Phalloidin_siYap_5.tif	62
																															1640	0			1649	VeCad_DAPI_40x8bit_2016_11_07_siYapTaz_5.tif	60			1649	Exp3_27217_DAPI_VeCad_Phalloidin_siCTR_2.tif	99
																															1641	0			1650	VeCad_DAPI_40x8bit_2016_11_07_siCTR_1.tif	69			1650	Exp2_13317_DAPI_VeCad_Phalloidin_siYapTaz_2.tif	21
																															1642	0			1651	VeCad_DAPI_40x8bit_2016_11_07_siYap_2.tif	75			1651	Exp2_13317_DAPI_VeCad_Phalloidin_siCTR_4.tif	57
																															1643	1			1652	VeCad_DAPI_40x8bit_2016_11_07_siCTR_4.tif	57			1652	Exp3_27217_DAPI_VeCad_Phalloidin_siYapTaz_3.tif	52
																															1644	5			1653	VeCad_DAPI_40x8bit_2016_11_07_siTaz_1.tif	82			1653	Exp2_13317_DAPI_VeCad_Phalloidin_siYap_3.tif	32
																															1645	5			1654	VeCad_DAPI_40x8bit_2016_11_07_siCTR_4.tif	89			1654	Exp3_27217_DAPI_VeCad_Phalloidin_siYapTaz_2.tif	72
																															1646	1			1655	VeCad_DAPI_40x8bit_2016_11_07_siYap_2.tif	28			1655	Exp2_13317_DAPI_VeCad_Phalloidin_siTaz_3.tif	82
																															1647	3			1656	VeCad_DAPI_40x8bit_2016_11_07_siCTR_1.tif	33			1656	Exp2_13317_DAPI_VeCad_Phalloidin_siYap_3.tif	1
																															1648	1			1657	VeCad_DAPI_40x8bit_2016_11_07_siYapTaz_3.tif	68			1657	Exp3_27217_DAPI_VeCad_Phalloidin_siCTR_5.tif	25
																															1649	1			1658	VeCad_DAPI_40x8bit_2016_11_07_siYapTaz_3.tif	53			1658	Exp3_27217_DAPI_VeCad_Phalloidin_siCTR_5.tif	30
																															1650	2			1659	VeCad_DAPI_40x8bit_2016_11_07_siCTR_5.tif	83			1659	Exp2_13317_DAPI_VeCad_Phalloidin_siCTR_4.tif	98
																															1651	2			1660	VeCad_DAPI_40x8bit_2016_11_07_siYap_3.tif	90			1660	Exp2_13317_DAPI_VeCad_Phalloidin_siCTR_3.tif	47
																															1652	1			1661	VeCad_DAPI_40x8bit_2016_11_07_siYapTaz_1.tif	66			1661	Exp2_13317_DAPI_VeCad_Phalloidin_siCTR_2.tif	12
																															1653	1			1662	VeCad_DAPI_40x8bit_2016_11_07_siYapTaz_3.tif	64			1662	Exp2_13317_DAPI_VeCad_Phalloidin_siYapTaz_3.tif	7
																															1654	0			1663	VeCad_DAPI_40x8bit_2016_11_07_siYapTaz_3.tif	43			1663	Exp2_13317_DAPI_VeCad_Phalloidin_siYapTaz_3.tif	27
																															1655	0			1664	VeCad_DAPI_40x8bit_2016_11_07_siTaz_3.tif	86			1664	Exp2_13317_DAPI_VeCad_Phalloidin_siYap_4.tif	90
																															1656	2			1665	VeCad_DAPI_40x8bit_2016_11_07_siYapTaz_1.tif	2			1665	Exp2_13317_DAPI_VeCad_Phalloidin_siTaz_4.tif	67
																															1657	2			1666	VeCad_DAPI_40x8bit_2016_11_07_siTaz_1.tif	45			1666	Exp2_13317_DAPI_VeCad_Phalloidin_siTaz_4.tif	91
																															1658	2			1667	VeCad_DAPI_40x8bit_2016_11_07_siCTR_4.tif	38			1667	Exp2_13317_DAPI_VeCad_Phalloidin_siYap_2.tif	55
																															1659	0			1668	VeCad_DAPI_40x8bit_2016_11_07_siCTR_3.tif	36			1668	Exp2_13317_DAPI_VeCad_Phalloidin_siYapTaz_5.tif	90
																															1660	0			1669	VeCad_DAPI_40x8bit_2016_11_07_siYapTaz_2.tif	31			1669	Exp2_13317_DAPI_VeCad_Phalloidin_siCTR_2.tif	94
																															1661	3			1670	VeCad_DAPI_40x8bit_2016_11_07_siCTR_1.tif	13			1670	Exp2_13317_DAPI_VeCad_Phalloidin_siYapTaz_5.tif	22
																															1662	0			1671	VeCad_DAPI_40x8bit_2016_11_07_siCTR_4.tif	52			1671	Exp3_27217_DAPI_VeCad_Phalloidin_siYapTaz_5.tif	21
																															1663	0			1672	VeCad_DAPI_40x8bit_2016_11_07_siTaz_1.tif	79			1672	Exp2_13317_DAPI_VeCad_Phalloidin_siCTR_3.tif	32
																															1664	1			1673	VeCad_DAPI_40x8bit_2016_11_07_siCTR_3.tif	61			1673	Exp2_13317_DAPI_VeCad_Phalloidin_siCTR_4.tif	23
																															1665	3			1674	VeCad_DAPI_40x8bit_2016_11_07_siYap_5.tif	5			1674	Exp2_13317_DAPI_VeCad_Phalloidin_siTaz_4.tif	86
																															1666	0			1675	VeCad_DAPI_40x8bit_2016_11_07_siYapTaz_1.tif	67			1675	Exp3_27217_DAPI_VeCad_Phalloidin_siYap_3.tif	24
																															1667	1			1676	VeCad_DAPI_40x8bit_2016_11_07_siCTR_4.tif	26			1676	Exp2_13317_DAPI_VeCad_Phalloidin_siYapTaz_3.tif	92
																															1668	1			1677	VeCad_DAPI_40x8bit_2016_11_07_siYapTaz_4.tif	27			1677	Exp2_13317_DAPI_VeCad_Phalloidin_siTaz_5.tif	34
																															1669	5			1678	VeCad_DAPI_40x8bit_2016_11_07_siCTR_3.tif	9			1678	Exp2_13317_DAPI_VeCad_Phalloidin_siYap_4.tif	9
																															1670	2			1679	VeCad_DAPI_40x8bit_2016_11_07_siCTR_3.tif	19			1679	Exp3_27217_DAPI_VeCad_Phalloidin_siCTR_5.tif	39
																															1671	0			1680	VeCad_DAPI_40x8bit_2016_11_07_siTaz_2.tif	24			1680	Exp2_13317_DAPI_VeCad_Phalloidin_siCTR_3.tif	42
																															1672	4			1681	VeCad_DAPI_40x8bit_2016_11_07_siCTR_5.tif	99			1681	Exp2_13317_DAPI_VeCad_Phalloidin_siYap_2.tif	11
																															1673	3			1682	VeCad_DAPI_40x8bit_2016_11_07_siTaz_3.tif	32			1682	Exp3_27217_DAPI_VeCad_Phalloidin_siYap_2.tif	43
																															1674	3			1683	VeCad_DAPI_40x8bit_2016_11_07_siYap_1.tif	33			1683	Exp2_13317_DAPI_VeCad_Phalloidin_siTaz_3.tif	14
																															1675	2			1684	VeCad_DAPI_40x8bit_2016_11_07_siYapTaz_2.tif	36			1684	Exp2_13317_DAPI_VeCad_Phalloidin_siCTR_5.tif	65
																															1676	5			1685	VeCad_DAPI_40x8bit_2016_11_07_siTaz_1.tif	84			1685	Exp2_13317_DAPI_VeCad_Phalloidin_siYapTaz_3.tif	88
																															1677	3			1686	VeCad_DAPI_40x8bit_2016_11_07_siTaz_4.tif	38			1686	Exp2_13317_DAPI_VeCad_Phalloidin_siYap_1.tif	60
																															1678	1			1687	VeCad_DAPI_40x8bit_2016_11_07_siYapTaz_4.tif	50			1687	Exp3_27217_DAPI_VeCad_Phalloidin_siCTR_1.tif	86
																															1679	4			1688	VeCad_DAPI_40x8bit_2016_11_07_siCTR_5.tif	88			1688	Exp2_13317_DAPI_VeCad_Phalloidin_siYap_1.tif	84
																															1680	0			1689	VeCad_DAPI_40x8bit_2016_11_07_siCTR_3.tif	27			1689	Exp3_27217_DAPI_VeCad_Phalloidin_siCTR_1.tif	2
																															1681	0			1690	VeCad_DAPI_40x8bit_2016_11_07_siCTR_1.tif	80			1690	Exp2_13317_DAPI_VeCad_Phalloidin_siTaz_4.tif	65
																															1682	0			1691	VeCad_DAPI_40x8bit_2016_11_07_siTaz_1.tif	22			1691	Exp2_13317_DAPI_VeCad_Phalloidin_siYapTaz_4.tif	60
																															1683	0			1692	VeCad_DAPI_40x8bit_2016_11_07_siTaz_5.tif	16			1692	Exp2_13317_DAPI_VeCad_Phalloidin_siTaz_1.tif	63
																															1684	4			1693	VeCad_DAPI_40x8bit_2016_11_07_siCTR_3.tif	78			1693	Exp2_13317_DAPI_VeCad_Phalloidin_siCTR_1.tif	97
																															1685	0			1694	VeCad_DAPI_40x8bit_2016_11_07_siYap_4.tif	41			1694	Exp3_27217_DAPI_VeCad_Phalloidin_siCTR_5.tif	69
																															1686	1			1695	VeCad_DAPI_40x8bit_2016_11_07_siTaz_2.tif	35			1695	Exp2_13317_DAPI_VeCad_Phalloidin_siTaz_4.tif	27
																															1687	4			1696	VeCad_DAPI_40x8bit_2016_11_07_siYapTaz_2.tif	63			1696	Exp2_13317_DAPI_VeCad_Phalloidin_siCTR_5.tif	38
																															1688	0			1697	VeCad_DAPI_40x8bit_2016_11_07_siYap_4.tif	8			1697	Exp2_13317_DAPI_VeCad_Phalloidin_siCTR_3.tif	69
																															1689	2			1698	VeCad_DAPI_40x8bit_2016_11_07_siYap_1.tif	54			1698	Exp3_27217_DAPI_VeCad_Phalloidin_siYap_1.tif	36
																															1690	2			1699	VeCad_DAPI_40x8bit_2016_11_07_siYapTaz_2.tif	28			1699	Exp2_13317_DAPI_VeCad_Phalloidin_siYapTaz_4.tif	90
																															1691	3			1700	VeCad_DAPI_40x8bit_2016_11_07_siTaz_4.tif	1			1700	Exp2_13317_DAPI_VeCad_Phalloidin_siTaz_2.tif	1
																															1692	2			1701	VeCad_DAPI_40x8bit_2016_11_07_siYap_1.tif	92			1701	Exp2_13317_DAPI_VeCad_Phalloidin_siYap_2.tif	65
																															1693	3			1702	VeCad_DAPI_40x8bit_2016_11_07_siCTR_4.tif	55			1702	Exp2_13317_DAPI_VeCad_Phalloidin_siTaz_4.tif	72
																															1694	4			1703	VeCad_DAPI_40x8bit_2016_11_07_siTaz_5.tif	45			1703	Exp3_27217_DAPI_VeCad_Phalloidin_siYapTaz_5.tif	20
																															1695	0			1704	VeCad_DAPI_40x8bit_2016_11_07_siCTR_2.tif	51			1704	Exp3_27217_DAPI_VeCad_Phalloidin_siCTR_4.tif	49
																															1696	2			1705	VeCad_DAPI_40x8bit_2016_11_07_siTaz_5.tif	43			1705	Exp3_27217_DAPI_VeCad_Phalloidin_siYap_3.tif	23
																															1697	3			1706	VeCad_DAPI_40x8bit_2016_11_07_siYap_5.tif	44			1706	Exp2_13317_DAPI_VeCad_Phalloidin_siYap_5.tif	2
																															1698	1			1707	VeCad_DAPI_40x8bit_2016_11_07_siYap_5.tif	8			1707	Exp2_13317_DAPI_VeCad_Phalloidin_siYap_5.tif	82
																															1699	0			1708	VeCad_DAPI_40x8bit_2016_11_07_siYap_4.tif	39			1708	Exp2_13317_DAPI_VeCad_Phalloidin_siYap_3.tif	0
																															1700	5			1709	VeCad_DAPI_40x8bit_2016_11_07_siCTR_1.tif	34			1709	Exp3_27217_DAPI_VeCad_Phalloidin_siCTR_1.tif	73
																															1701	0			1710	VeCad_DAPI_40x8bit_2016_11_07_siTaz_2.tif	96			1710	Exp2_13317_DAPI_VeCad_Phalloidin_siYap_2.tif	57
																															1702	1			1711	VeCad_DAPI_40x8bit_2016_11_07_siTaz_2.tif	15			1711	Exp3_27217_DAPI_VeCad_Phalloidin_siYapTaz_2.tif	80
																															1703	1			1712	VeCad_DAPI_40x8bit_2016_11_07_siTaz_1.tif	2			1712	Exp3_27217_DAPI_VeCad_Phalloidin_siCTR_4.tif	56
																															1704	2			1713	VeCad_DAPI_40x8bit_2016_11_07_siCTR_1.tif	50			1713	Exp2_13317_DAPI_VeCad_Phalloidin_siYap_5.tif	19
																															1705	0			1714	VeCad_DAPI_40x8bit_2016_11_07_siTaz_4.tif	56			1714	Exp3_27217_DAPI_VeCad_Phalloidin_siYap_1.tif	81
																															1706	1			1715	VeCad_DAPI_40x8bit_2016_11_07_siCTR_2.tif	81			1715	Exp2_13317_DAPI_VeCad_Phalloidin_siCTR_2.tif	57
																															1707	1			1716	VeCad_DAPI_40x8bit_2016_11_07_siYap_3.tif	10			1716	Exp2_13317_DAPI_VeCad_Phalloidin_siYapTaz_5.tif	21
																															1708	0			1717	VeCad_DAPI_40x8bit_2016_11_07_siCTR_3.tif	71			1717	Exp3_27217_DAPI_VeCad_Phalloidin_siYap_1.tif	69
																															1709	3			1718	VeCad_DAPI_40x8bit_2016_11_07_siTaz_2.tif	8			1718	Exp2_13317_DAPI_VeCad_Phalloidin_siTaz_1.tif	91
																															1710	1			1719	VeCad_DAPI_40x8bit_2016_11_07_siYapTaz_4.tif	14			1719	Exp2_13317_DAPI_VeCad_Phalloidin_siCTR_5.tif	73
																															1711	0			1720	VeCad_DAPI_40x8bit_2016_11_07_siYap_4.tif	40			1720	Exp3_27217_DAPI_VeCad_Phalloidin_siCTR_5.tif	37
																															1712	3			1721	VeCad_DAPI_40x8bit_2016_11_07_siYapTaz_2.tif	76			1721	Exp2_13317_DAPI_VeCad_Phalloidin_siTaz_2.tif	56
																															1713	2			1722	VeCad_DAPI_40x8bit_2016_11_07_siCTR_1.tif	4			1722	Exp3_27217_DAPI_VeCad_Phalloidin_siYap_1.tif	53
																															1714	0			1723	VeCad_DAPI_40x8bit_2016_11_07_siYapTaz_3.tif	93			1723	Exp2_13317_DAPI_VeCad_Phalloidin_siTaz_5.tif	22
																															1715	0			1724	VeCad_DAPI_40x8bit_2016_11_07_siYapTaz_2.tif	56			1724	Exp2_13317_DAPI_VeCad_Phalloidin_siCTR_5.tif	86
																															1716	5			1725	VeCad_DAPI_40x8bit_2016_11_07_siYap_5.tif	95			1725	Exp3_27217_DAPI_VeCad_Phalloidin_siYapTaz_5.tif	61
																															1717	1			1726	VeCad_DAPI_40x8bit_2016_11_07_siCTR_5.tif	12			1726	Exp2_13317_DAPI_VeCad_Phalloidin_siTaz_2.tif	13
																															1718	3			1727	VeCad_DAPI_40x8bit_2016_11_07_siYapTaz_4.tif	5			1727	Exp3_27217_DAPI_VeCad_Phalloidin_siYapTaz_5.tif	30
																															1719	0			1728	VeCad_DAPI_40x8bit_2016_11_07_siTaz_1.tif	32			1728	Exp2_13317_DAPI_VeCad_Phalloidin_siYapTaz_2.tif	78
																															1720	0			1729	VeCad_DAPI_40x8bit_2016_11_07_siYapTaz_2.tif	71			1729	Exp2_13317_DAPI_VeCad_Phalloidin_siCTR_3.tif	1
																															1721	2			1730	VeCad_DAPI_40x8bit_2016_11_07_siYapTaz_5.tif	4			1730	Exp3_27217_DAPI_VeCad_Phalloidin_siYapTaz_3.tif	11
																															1722	1			1731	VeCad_DAPI_40x8bit_2016_11_07_siTaz_1.tif	20			1731	Exp2_13317_DAPI_VeCad_Phalloidin_siCTR_5.tif	91
																															1723	5			1732	VeCad_DAPI_40x8bit_2016_11_07_siCTR_5.tif	25			1732	Exp3_27217_DAPI_VeCad_Phalloidin_siYap_3.tif	9
																															1724	0			1733	VeCad_DAPI_40x8bit_2016_11_07_siYap_2.tif	46			1733	Exp2_13317_DAPI_VeCad_Phalloidin_siCTR_3.tif	11
																															1725	2			1734	VeCad_DAPI_40x8bit_2016_11_07_siYapTaz_4.tif	86			1734	Exp3_27217_DAPI_VeCad_Phalloidin_siYapTaz_5.tif	96
																															1726	0			1735	VeCad_DAPI_40x8bit_2016_11_07_siYap_1.tif	67			1735	Exp3_27217_DAPI_VeCad_Phalloidin_siCTR_2.tif	79
																															1727	0			1736	VeCad_DAPI_40x8bit_2016_11_07_siTaz_1.tif	90			1736	Exp2_13317_DAPI_VeCad_Phalloidin_siYapTaz_4.tif	17
																															1728	0			1737	VeCad_DAPI_40x8bit_2016_11_07_siYapTaz_1.tif	61			1737	Exp2_13317_DAPI_VeCad_Phalloidin_siTaz_4.tif	37
																															1729	3			1738	VeCad_DAPI_40x8bit_2016_11_07_siYapTaz_2.tif	54			1738	Exp3_27217_DAPI_VeCad_Phalloidin_siYapTaz_5.tif	70
																															1730	5			1739	VeCad_DAPI_40x8bit_2016_11_07_siCTR_2.tif	25			1739	Exp2_13317_DAPI_VeCad_Phalloidin_siCTR_1.tif	44
																															1731	3			1740	VeCad_DAPI_40x8bit_2016_11_07_siYapTaz_1.tif	48			1740	Exp2_13317_DAPI_VeCad_Phalloidin_siCTR_3.tif	12
																															1732	2			1741	VeCad_DAPI_40x8bit_2016_11_07_siCTR_5.tif	91			1741	Exp2_13317_DAPI_VeCad_Phalloidin_siTaz_4.tif	22
																															1733	0			1742	VeCad_DAPI_40x8bit_2016_11_07_siCTR_4.tif	19			1742	Exp2_13317_DAPI_VeCad_Phalloidin_siTaz_3.tif	63
																															1734	0			1743	VeCad_DAPI_40x8bit_2016_11_07_siYap_4.tif	85			1743	Exp2_13317_DAPI_VeCad_Phalloidin_siCTR_2.tif	31
																															1735	0			1744	VeCad_DAPI_40x8bit_2016_11_07_siYapTaz_3.tif	41			1744	Exp3_27217_DAPI_VeCad_Phalloidin_siCTR_2.tif	43
																															1736	0			1745	VeCad_DAPI_40x8bit_2016_11_07_siYap_3.tif	23			1745	Exp3_27217_DAPI_VeCad_Phalloidin_siCTR_4.tif	59
																															1737	0			1746	VeCad_DAPI_40x8bit_2016_11_07_siCTR_1.tif	99			1746	Exp2_13317_DAPI_VeCad_Phalloidin_siYapTaz_2.tif	60
																															1738	5			1747	VeCad_DAPI_40x8bit_2016_11_07_siTaz_3.tif	92			1747	Exp3_27217_DAPI_VeCad_Phalloidin_siCTR_2.tif	10
																															1739	3			1748	VeCad_DAPI_40x8bit_2016_11_07_siYapTaz_2.tif	82			1748	Exp3_27217_DAPI_VeCad_Phalloidin_siYap_4.tif	12
																															1740	0			1749	VeCad_DAPI_40x8bit_2016_11_07_siCTR_1.tif	88			1749	Exp2_13317_DAPI_VeCad_Phalloidin_siCTR_1.tif	89
																															1741	5			1750	VeCad_DAPI_40x8bit_2016_11_07_siYap_3.tif	56			1750	Exp2_13317_DAPI_VeCad_Phalloidin_siTaz_4.tif	64
																															1742	1			1751	VeCad_DAPI_40x8bit_2016_11_07_siYap_4.tif	3			1751	Exp2_13317_DAPI_VeCad_Phalloidin_siYap_2.tif	26
																															1743	2			1752	VeCad_DAPI_40x8bit_2016_11_07_siCTR_3.tif	69			1752	Exp2_13317_DAPI_VeCad_Phalloidin_siYapTaz_5.tif	49
																															1744	0			1753	VeCad_DAPI_40x8bit_2016_11_07_siTaz_5.tif	59			1753	Exp3_27217_DAPI_VeCad_Phalloidin_siYapTaz_2.tif	73
																															1745	0			1754	VeCad_DAPI_40x8bit_2016_11_07_siYapTaz_2.tif	83			1754	Exp2_13317_DAPI_VeCad_Phalloidin_siTaz_2.tif	26
																															1746	1			1755	VeCad_DAPI_40x8bit_2016_11_07_siCTR_2.tif	19			1755	Exp3_27217_DAPI_VeCad_Phalloidin_siYapTaz_2.tif	18
																															1747	1			1756	VeCad_DAPI_40x8bit_2016_11_07_siYap_2.tif	44			1756	Exp2_13317_DAPI_VeCad_Phalloidin_siCTR_5.tif	34
																															1748	1			1757	VeCad_DAPI_40x8bit_2016_11_07_siYap_2.tif	16			1757	Exp3_27217_DAPI_VeCad_Phalloidin_siYap_1.tif	89
																															1749	2			1758	VeCad_DAPI_40x8bit_2016_11_07_siCTR_1.tif	39			1758	Exp3_27217_DAPI_VeCad_Phalloidin_siYap_5.tif	34
																															1750	1			1759	VeCad_DAPI_40x8bit_2016_11_07_siTaz_2.tif	56			1759	Exp2_13317_DAPI_VeCad_Phalloidin_siYapTaz_2.tif	3
																															1751	1			1760	VeCad_DAPI_40x8bit_2016_11_07_siTaz_3.tif	85			1760	Exp3_27217_DAPI_VeCad_Phalloidin_siCTR_3.tif	18
																															1752	0			1761	VeCad_DAPI_40x8bit_2016_11_07_siYap_3.tif	99			1761	Exp2_13317_DAPI_VeCad_Phalloidin_siCTR_5.tif	5
																															1753	2			1762	VeCad_DAPI_40x8bit_2016_11_07_siCTR_2.tif	10			1762	Exp3_27217_DAPI_VeCad_Phalloidin_siYapTaz_3.tif	38
																															1754	0			1763	VeCad_DAPI_40x8bit_2016_11_07_siCTR_2.tif	67			1763	Exp2_13317_DAPI_VeCad_Phalloidin_siYap_4.tif	35
																															1755	1			1764	VeCad_DAPI_40x8bit_2016_11_07_siYapTaz_2.tif	75			1764	Exp3_27217_DAPI_VeCad_Phalloidin_siYap_1.tif	31
																															1756	0			1765	VeCad_DAPI_40x8bit_2016_11_07_siYapTaz_1.tif	64			1765	Exp2_13317_DAPI_VeCad_Phalloidin_siYap_3.tif	63
																															1757	0			1766	VeCad_DAPI_40x8bit_2016_11_07_siYapTaz_4.tif	24			1766	Exp2_13317_DAPI_VeCad_Phalloidin_siYap_1.tif	95
																															1758	1			1767	VeCad_DAPI_40x8bit_2016_11_07_siYap_5.tif	74			1767	Exp3_27217_DAPI_VeCad_Phalloidin_siYapTaz_3.tif	34
																															1759	0			1768	VeCad_DAPI_40x8bit_2016_11_07_siCTR_3.tif	66			1768	Exp3_27217_DAPI_VeCad_Phalloidin_siYapTaz_4.tif	19
																															1760	2			1769	VeCad_DAPI_40x8bit_2016_11_07_siYap_4.tif	99			1769	Exp3_27217_DAPI_VeCad_Phalloidin_siCTR_3.tif	73
																															1761	4			1770	VeCad_DAPI_40x8bit_2016_11_07_siCTR_5.tif	67			1770	Exp2_13317_DAPI_VeCad_Phalloidin_siYap_4.tif	40
																															1762	1			1771	VeCad_DAPI_40x8bit_2016_11_07_siTaz_3.tif	80			1771	Exp3_27217_DAPI_VeCad_Phalloidin_siYapTaz_1.tif	58
																															1763	1			1772	VeCad_DAPI_40x8bit_2016_11_07_siYap_5.tif	38			1772	Exp3_27217_DAPI_VeCad_Phalloidin_siYap_2.tif	51
																															1764	0			1773	VeCad_DAPI_40x8bit_2016_11_07_siTaz_4.tif	92			1773	Exp2_13317_DAPI_VeCad_Phalloidin_siYap_3.tif	51
																															1765	0			1774	VeCad_DAPI_40x8bit_2016_11_07_siCTR_3.tif	34			1774	Exp2_13317_DAPI_VeCad_Phalloidin_siYap_2.tif	79
																															1766	1			1775	VeCad_DAPI_40x8bit_2016_11_07_siCTR_2.tif	70			1775	Exp3_27217_DAPI_VeCad_Phalloidin_siYapTaz_4.tif	30
																															1767	1			1776	VeCad_DAPI_40x8bit_2016_11_07_siCTR_2.tif	98			1776	Exp2_13317_DAPI_VeCad_Phalloidin_siYapTaz_5.tif	39
																															1768	3			1777	VeCad_DAPI_40x8bit_2016_11_07_siYapTaz_5.tif	64			1777	Exp3_27217_DAPI_VeCad_Phalloidin_siCTR_4.tif	15
																															1769	3			1778	VeCad_DAPI_40x8bit_2016_11_07_siTaz_4.tif	99			1778	Exp3_27217_DAPI_VeCad_Phalloidin_siYap_5.tif	43
																															1770	1			1779	VeCad_DAPI_40x8bit_2016_11_07_siYapTaz_5.tif	26			1779	Exp3_27217_DAPI_VeCad_Phalloidin_siYapTaz_1.tif	13
																															1771	0			1780	VeCad_DAPI_40x8bit_2016_11_07_siYapTaz_3.tif	87			1780	Exp3_27217_DAPI_VeCad_Phalloidin_siCTR_5.tif	5
																															1772	0			1781	VeCad_DAPI_40x8bit_2016_11_07_siYap_2.tif	3			1781	Exp2_13317_DAPI_VeCad_Phalloidin_siCTR_5.tif	22
																															1773	5			1782	VeCad_DAPI_40x8bit_2016_11_07_siYapTaz_3.tif	28			1782	Exp2_13317_DAPI_VeCad_Phalloidin_siYapTaz_5.tif	33
																															1774	1			1783	VeCad_DAPI_40x8bit_2016_11_07_siYap_3.tif	0			1783	Exp2_13317_DAPI_VeCad_Phalloidin_siYapTaz_2.tif	92
																															1775	0			1784	VeCad_DAPI_40x8bit_2016_11_07_siYap_5.tif	64			1784	Exp3_27217_DAPI_VeCad_Phalloidin_siYapTaz_5.tif	59
																															1776	1			1785	VeCad_DAPI_40x8bit_2016_11_07_siYapTaz_3.tif	32			1785	Exp2_13317_DAPI_VeCad_Phalloidin_siYap_4.tif	51
																															1777	2			1786	VeCad_DAPI_40x8bit_2016_11_07_siCTR_4.tif	72			1786	Exp3_27217_DAPI_VeCad_Phalloidin_siYapTaz_3.tif	65
																															1778	1			1787	VeCad_DAPI_40x8bit_2016_11_07_siTaz_2.tif	25			1787	Exp2_13317_DAPI_VeCad_Phalloidin_siCTR_5.tif	37
																															1779	2			1788	VeCad_DAPI_40x8bit_2016_11_07_siCTR_5.tif	66			1788	Exp2_13317_DAPI_VeCad_Phalloidin_siYap_2.tif	97
																															1780	3			1789	VeCad_DAPI_40x8bit_2016_11_07_siTaz_4.tif	30			1789	Exp2_13317_DAPI_VeCad_Phalloidin_siYapTaz_4.tif	36
																															1781	3			1790	VeCad_DAPI_40x8bit_2016_11_07_siYap_5.tif	65			1790	Exp3_27217_DAPI_VeCad_Phalloidin_siYap_5.tif	44
																															1782	0			1791	VeCad_DAPI_40x8bit_2016_11_07_siYap_3.tif	72			1791	Exp2_13317_DAPI_VeCad_Phalloidin_siTaz_5.tif	67
																															1783	1			1792	VeCad_DAPI_40x8bit_2016_11_07_siYapTaz_1.tif	11			1792	Exp3_27217_DAPI_VeCad_Phalloidin_siYap_3.tif	98
																															1784	1			1793	VeCad_DAPI_40x8bit_2016_11_07_siCTR_1.tif	70			1793	Exp2_13317_DAPI_VeCad_Phalloidin_siTaz_1.tif	57
																															1785	1			1794	VeCad_DAPI_40x8bit_2016_11_07_siCTR_1.tif	94			1794	Exp2_13317_DAPI_VeCad_Phalloidin_siCTR_2.tif	97
																															1786	1			1795	VeCad_DAPI_40x8bit_2016_11_07_siTaz_1.tif	57			1795	Exp2_13317_DAPI_VeCad_Phalloidin_siTaz_1.tif	48
																															1787	4			1796	VeCad_DAPI_40x8bit_2016_11_07_siCTR_4.tif	3			1796	Exp2_13317_DAPI_VeCad_Phalloidin_siTaz_4.tif	14
																															1788	1			1797	VeCad_DAPI_40x8bit_2016_11_07_siTaz_3.tif	60			1797	Exp2_13317_DAPI_VeCad_Phalloidin_siYap_4.tif	49
																															1789	2			1798	VeCad_DAPI_40x8bit_2016_11_07_siYap_1.tif	18			1798	Exp2_13317_DAPI_VeCad_Phalloidin_siCTR_1.tif	51
																															1790	0			1799	VeCad_DAPI_40x8bit_2016_11_07_siCTR_4.tif	50			1799	Exp3_27217_DAPI_VeCad_Phalloidin_siYapTaz_3.tif	32
																															1791	0			1800	VeCad_DAPI_40x8bit_2016_11_07_siTaz_5.tif	51			1800	Exp2_13317_DAPI_VeCad_Phalloidin_siCTR_3.tif	38
																															1792	0			1801	VeCad_DAPI_40x8bit_2016_11_07_siYapTaz_4.tif	29			1801	Exp2_13317_DAPI_VeCad_Phalloidin_siCTR_3.tif	91
																															1793	0			1802	VeCad_DAPI_40x8bit_2016_11_07_siCTR_1.tif	79			1802	Exp2_13317_DAPI_VeCad_Phalloidin_siTaz_4.tif	48
																															1794	5			1803	VeCad_DAPI_40x8bit_2016_11_07_siYap_4.tif	16			1803	Exp3_27217_DAPI_VeCad_Phalloidin_siYapTaz_4.tif	78
																															1795	0			1804	VeCad_DAPI_40x8bit_2016_11_07_siYapTaz_2.tif	39			1804	Exp2_13317_DAPI_VeCad_Phalloidin_siYapTaz_2.tif	94
																															1796	5			1805	VeCad_DAPI_40x8bit_2016_11_07_siYapTaz_1.tif	33			1805	Exp2_13317_DAPI_VeCad_Phalloidin_siTaz_4.tif	3
																															1797	1			1806	VeCad_DAPI_40x8bit_2016_11_07_siYapTaz_3.tif	9			1806	Exp2_13317_DAPI_VeCad_Phalloidin_siCTR_3.tif	50
																															1798	0			1807	VeCad_DAPI_40x8bit_2016_11_07_siYap_2.tif	80			1807	Exp2_13317_DAPI_VeCad_Phalloidin_siYapTaz_2.tif	11
																															1799	1			1808	VeCad_DAPI_40x8bit_2016_11_07_siTaz_5.tif	82			1808	Exp3_27217_DAPI_VeCad_Phalloidin_siCTR_4.tif	10
																															1800	4			1809	VeCad_DAPI_40x8bit_2016_11_07_siCTR_3.tif	82			1809	Exp2_13317_DAPI_VeCad_Phalloidin_siYapTaz_2.tif	34
																															1801	1			1810	VeCad_DAPI_40x8bit_2016_11_07_siCTR_3.tif	38			1810	Exp3_27217_DAPI_VeCad_Phalloidin_siCTR_3.tif	31
																															1802	0			1811	VeCad_DAPI_40x8bit_2016_11_07_siYap_2.tif	53			1811	Exp3_27217_DAPI_VeCad_Phalloidin_siYap_3.tif	25
																															1803	0			1812	VeCad_DAPI_40x8bit_2016_11_07_siYapTaz_3.tif	75			1812	Exp2_13317_DAPI_VeCad_Phalloidin_siYapTaz_1.tif	40
																															1804	3			1813	VeCad_DAPI_40x8bit_2016_11_07_siCTR_4.tif	84			1813	Exp2_13317_DAPI_VeCad_Phalloidin_siTaz_3.tif	74
																															1805	5			1814	VeCad_DAPI_40x8bit_2016_11_07_siYap_1.tif	49			1814	Exp3_27217_DAPI_VeCad_Phalloidin_siYapTaz_3.tif	7
																															1806	4			1815	VeCad_DAPI_40x8bit_2016_11_07_siCTR_4.tif	8			1815	Exp3_27217_DAPI_VeCad_Phalloidin_siYap_4.tif	63
																															1807	1			1816	VeCad_DAPI_40x8bit_2016_11_07_siCTR_3.tif	6			1816	Exp3_27217_DAPI_VeCad_Phalloidin_siYap_2.tif	32
																															1808	4			1817	VeCad_DAPI_40x8bit_2016_11_07_siYapTaz_3.tif	26			1817	Exp2_13317_DAPI_VeCad_Phalloidin_siYapTaz_4.tif	11
																															1809	0			1818	VeCad_DAPI_40x8bit_2016_11_07_siYapTaz_2.tif	46			1818	Exp2_13317_DAPI_VeCad_Phalloidin_siYap_1.tif	31
																															1810	4			1819	VeCad_DAPI_40x8bit_2016_11_07_siCTR_4.tif	36			1819	Exp2_13317_DAPI_VeCad_Phalloidin_siYapTaz_1.tif	24
																															1811	2			1820	VeCad_DAPI_40x8bit_2016_11_07_siCTR_5.tif	59			1820	Exp2_13317_DAPI_VeCad_Phalloidin_siYapTaz_1.tif	83
																															1812	0			1821	VeCad_DAPI_40x8bit_2016_11_07_siYap_2.tif	17			1821	Exp2_13317_DAPI_VeCad_Phalloidin_siTaz_3.tif	21
																															1813	2			1822	VeCad_DAPI_40x8bit_2016_11_07_siCTR_3.tif	70			1822	Exp3_27217_DAPI_VeCad_Phalloidin_siYapTaz_3.tif	6
																															1814	0			1823	VeCad_DAPI_40x8bit_2016_11_07_siYapTaz_4.tif	9			1823	Exp3_27217_DAPI_VeCad_Phalloidin_siYap_3.tif	31
																															1815	0			1824	VeCad_DAPI_40x8bit_2016_11_07_siYapTaz_2.tif	60			1824	Exp2_13317_DAPI_VeCad_Phalloidin_siYap_1.tif	36
																															1816	5			1825	VeCad_DAPI_40x8bit_2016_11_07_siTaz_1.tif	13			1825	Exp2_13317_DAPI_VeCad_Phalloidin_siCTR_4.tif	8
																															1817	0			1826	VeCad_DAPI_40x8bit_2016_11_07_siTaz_4.tif	15			1826	Exp2_13317_DAPI_VeCad_Phalloidin_siYap_1.tif	46
																															1818	0			1827	VeCad_DAPI_40x8bit_2016_11_07_siTaz_2.tif	81			1827	Exp2_13317_DAPI_VeCad_Phalloidin_siTaz_4.tif	50
																															1819	3			1828	VeCad_DAPI_40x8bit_2016_11_07_siCTR_4.tif	87			1828	Exp2_13317_DAPI_VeCad_Phalloidin_siTaz_4.tif	34
																															1820	1			1829	VeCad_DAPI_40x8bit_2016_11_07_siYap_1.tif	65			1829	Exp3_27217_DAPI_VeCad_Phalloidin_siCTR_1.tif	35
																															1821	1			1830	VeCad_DAPI_40x8bit_2016_11_07_siYap_3.tif	26			1830	Exp3_27217_DAPI_VeCad_Phalloidin_siYapTaz_2.tif	58
																															1822	3			1831	VeCad_DAPI_40x8bit_2016_11_07_siTaz_5.tif	9			1831	Exp3_27217_DAPI_VeCad_Phalloidin_siCTR_3.tif	40
																															1823	1			1832	VeCad_DAPI_40x8bit_2016_11_07_siTaz_2.tif	0			1832	Exp2_13317_DAPI_VeCad_Phalloidin_siTaz_3.tif	93
																															1824	1			1833	VeCad_DAPI_40x8bit_2016_11_07_siYapTaz_2.tif	15			1833	Exp2_13317_DAPI_VeCad_Phalloidin_siTaz_2.tif	33
																															1825	2			1834	VeCad_DAPI_40x8bit_2016_11_07_siYapTaz_5.tif	52			1834	Exp2_13317_DAPI_VeCad_Phalloidin_siTaz_4.tif	26
																															1826	1			1835	VeCad_DAPI_40x8bit_2016_11_07_siYap_4.tif	2			1835	Exp2_13317_DAPI_VeCad_Phalloidin_siTaz_2.tif	25
																															1827	2			1836	VeCad_DAPI_40x8bit_2016_11_07_siCTR_2.tif	57			1836	Exp2_13317_DAPI_VeCad_Phalloidin_siYap_5.tif	60
																															1828	0			1837	VeCad_DAPI_40x8bit_2016_11_07_siYapTaz_4.tif	20			1837	Exp3_27217_DAPI_VeCad_Phalloidin_siCTR_1.tif	65
																															1829	0			1838	VeCad_DAPI_40x8bit_2016_11_07_siYapTaz_1.tif	52			1838	Exp3_27217_DAPI_VeCad_Phalloidin_siCTR_3.tif	61
																															1830	4			1839	VeCad_DAPI_40x8bit_2016_11_07_siYapTaz_1.tif	49			1839	Exp2_13317_DAPI_VeCad_Phalloidin_siYap_3.tif	80
																															1831	4			1840	VeCad_DAPI_40x8bit_2016_11_07_siYap_2.tif	69			1840	Exp3_27217_DAPI_VeCad_Phalloidin_siYap_1.tif	19
																															1832	3			1841	VeCad_DAPI_40x8bit_2016_11_07_siTaz_1.tif	77			1841	Exp2_13317_DAPI_VeCad_Phalloidin_siYap_2.tif	87
																															1833	0			1842	VeCad_DAPI_40x8bit_2016_11_07_siYap_2.tif	88			1842	Exp3_27217_DAPI_VeCad_Phalloidin_siYapTaz_2.tif	49
																															1834	0			1843	VeCad_DAPI_40x8bit_2016_11_07_siTaz_2.tif	31			1843	Exp3_27217_DAPI_VeCad_Phalloidin_siCTR_3.tif	58
																															1835	5			1844	VeCad_DAPI_40x8bit_2016_11_07_siCTR_3.tif	88			1844	Exp3_27217_DAPI_VeCad_Phalloidin_siCTR_5.tif	21
																															1836	1			1845	VeCad_DAPI_40x8bit_2016_11_07_siYap_1.tif	73			1845	Exp2_13317_DAPI_VeCad_Phalloidin_siCTR_1.tif	71
																															1837	3			1846	VeCad_DAPI_40x8bit_2016_11_07_siYap_5.tif	54			1846	Exp3_27217_DAPI_VeCad_Phalloidin_siYapTaz_5.tif	15
																															1838	1			1847	VeCad_DAPI_40x8bit_2016_11_07_siCTR_5.tif	13			1847	Exp2_13317_DAPI_VeCad_Phalloidin_siTaz_4.tif	17
																															1839	0			1848	VeCad_DAPI_40x8bit_2016_11_07_siYapTaz_4.tif	61			1848	Exp2_13317_DAPI_VeCad_Phalloidin_siYap_1.tif	52
																															1840	1			1849	VeCad_DAPI_40x8bit_2016_11_07_siYap_5.tif	67			1849	Exp3_27217_DAPI_VeCad_Phalloidin_siYapTaz_3.tif	45
																															1841	1			1850	VeCad_DAPI_40x8bit_2016_11_07_siYap_3.tif	40			1850	Exp2_13317_DAPI_VeCad_Phalloidin_siTaz_5.tif	27
																															1842	1			1851	VeCad_DAPI_40x8bit_2016_11_07_siTaz_3.tif	10			1851	Exp3_27217_DAPI_VeCad_Phalloidin_siYapTaz_2.tif	11
																															1843	0			1852	VeCad_DAPI_40x8bit_2016_11_07_siCTR_1.tif	77			1852	Exp3_27217_DAPI_VeCad_Phalloidin_siYap_4.tif	32
																															1844	4			1853	VeCad_DAPI_40x8bit_2016_11_07_siCTR_2.tif	72			1853	Exp2_13317_DAPI_VeCad_Phalloidin_siYapTaz_4.tif	47
																															1845	2			1854	VeCad_DAPI_40x8bit_2016_11_07_siCTR_1.tif	12			1854	Exp3_27217_DAPI_VeCad_Phalloidin_siCTR_5.tif	51
																															1846	1			1855	VeCad_DAPI_40x8bit_2016_11_07_siCTR_4.tif	34			1855	Exp3_27217_DAPI_VeCad_Phalloidin_siYapTaz_4.tif	55
																															1847	0			1856	VeCad_DAPI_40x8bit_2016_11_07_siYapTaz_2.tif	50			1856	Exp2_13317_DAPI_VeCad_Phalloidin_siCTR_4.tif	90
																															1848	0			1857	VeCad_DAPI_40x8bit_2016_11_07_siTaz_1.tif	47			1857	Exp2_13317_DAPI_VeCad_Phalloidin_siCTR_3.tif	10
																															1849	5			1858	VeCad_DAPI_40x8bit_2016_11_07_siYap_3.tif	62			1858	Exp2_13317_DAPI_VeCad_Phalloidin_siTaz_4.tif	94
																															1850	3			1859	VeCad_DAPI_40x8bit_2016_11_07_siTaz_2.tif	4			1859	Exp2_13317_DAPI_VeCad_Phalloidin_siYapTaz_5.tif	63
																															1851	0			1860	VeCad_DAPI_40x8bit_2016_11_07_siYapTaz_5.tif	24			1860	Exp3_27217_DAPI_VeCad_Phalloidin_siYapTaz_4.tif	3
																															1852	0			1861	VeCad_DAPI_40x8bit_2016_11_07_siTaz_5.tif	31			1861	Exp3_27217_DAPI_VeCad_Phalloidin_siYap_2.tif	34
																															1853	0			1862	VeCad_DAPI_40x8bit_2016_11_07_siTaz_2.tif	58			1862	Exp3_27217_DAPI_VeCad_Phalloidin_siYapTaz_1.tif	47
																															1854	5			1863	VeCad_DAPI_40x8bit_2016_11_07_siTaz_5.tif	33			1863	Exp3_27217_DAPI_VeCad_Phalloidin_siYap_3.tif	77
																															1855	5			1864	VeCad_DAPI_40x8bit_2016_11_07_siYap_1.tif	41			1864	Exp2_13317_DAPI_VeCad_Phalloidin_siYapTaz_4.tif	43
																															1856	5			1865	VeCad_DAPI_40x8bit_2016_11_07_siCTR_2.tif	94			1865	Exp2_13317_DAPI_VeCad_Phalloidin_siTaz_2.tif	86
																															1857	3			1866	VeCad_DAPI_40x8bit_2016_11_07_siTaz_1.tif	43			1866	Exp2_13317_DAPI_VeCad_Phalloidin_siYapTaz_4.tif	93
																															1858	5			1867	VeCad_DAPI_40x8bit_2016_11_07_siYap_1.tif	62			1867	Exp2_13317_DAPI_VeCad_Phalloidin_siCTR_3.tif	52
																															1859	1			1868	VeCad_DAPI_40x8bit_2016_11_07_siYapTaz_4.tif	23			1868	Exp2_13317_DAPI_VeCad_Phalloidin_siTaz_3.tif	12
																															1860	0			1869	VeCad_DAPI_40x8bit_2016_11_07_siCTR_2.tif	23			1869	Exp3_27217_DAPI_VeCad_Phalloidin_siCTR_5.tif	16
																															1861	1			1870	VeCad_DAPI_40x8bit_2016_11_07_siYap_4.tif	34			1870	Exp3_27217_DAPI_VeCad_Phalloidin_siYapTaz_3.tif	49
																															1862	3			1871	VeCad_DAPI_40x8bit_2016_11_07_siCTR_4.tif	5			1871	Exp3_27217_DAPI_VeCad_Phalloidin_siYap_2.tif	25
																															1863	2			1872	VeCad_DAPI_40x8bit_2016_11_07_siTaz_4.tif	93			1872	Exp2_13317_DAPI_VeCad_Phalloidin_siTaz_1.tif	14
																															1864	2			1873	VeCad_DAPI_40x8bit_2016_11_07_siCTR_4.tif	17			1873	Exp3_27217_DAPI_VeCad_Phalloidin_siYapTaz_5.tif	91
																															1865	2			1874	VeCad_DAPI_40x8bit_2016_11_07_siYap_4.tif	80			1874	Exp3_27217_DAPI_VeCad_Phalloidin_siCTR_5.tif	63
																															1866	0			1875	VeCad_DAPI_40x8bit_2016_11_07_siTaz_2.tif	28			1875	Exp2_13317_DAPI_VeCad_Phalloidin_siYapTaz_2.tif	82
																															1867	4			1876	VeCad_DAPI_40x8bit_2016_11_07_siCTR_2.tif	37			1876	Exp3_27217_DAPI_VeCad_Phalloidin_siCTR_5.tif	20
																															1868	0			1877	VeCad_DAPI_40x8bit_2016_11_07_siTaz_5.tif	80			1877	Exp2_13317_DAPI_VeCad_Phalloidin_siTaz_2.tif	90
																															1869	0			1878	VeCad_DAPI_40x8bit_2016_11_07_siCTR_1.tif	38			1878	Exp3_27217_DAPI_VeCad_Phalloidin_siYapTaz_3.tif	92
																															1870	0			1879	VeCad_DAPI_40x8bit_2016_11_07_siCTR_1.tif	66			1879	Exp2_13317_DAPI_VeCad_Phalloidin_siCTR_1.tif	81
																															1871	0			1880	VeCad_DAPI_40x8bit_2016_11_07_siTaz_5.tif	44			1880	Exp3_27217_DAPI_VeCad_Phalloidin_siCTR_1.tif	5
																															1872	4			1881	VeCad_DAPI_40x8bit_2016_11_07_siYap_4.tif	96			1881	Exp3_27217_DAPI_VeCad_Phalloidin_siYap_2.tif	37
																															1873	0			1882	VeCad_DAPI_40x8bit_2016_11_07_siYapTaz_2.tif	52			1882	Exp2_13317_DAPI_VeCad_Phalloidin_siTaz_3.tif	60
																															1874	0			1883	VeCad_DAPI_40x8bit_2016_11_07_siCTR_2.tif	55			1883	Exp2_13317_DAPI_VeCad_Phalloidin_siCTR_3.tif	58
																															1875	1			1884	VeCad_DAPI_40x8bit_2016_11_07_siTaz_1.tif	93			1884	Exp3_27217_DAPI_VeCad_Phalloidin_siYap_3.tif	99
																															1876	2			1885	VeCad_DAPI_40x8bit_2016_11_07_siYap_2.tif	81			1885	Exp2_13317_DAPI_VeCad_Phalloidin_siYapTaz_4.tif	21
																															1877	0			1886	VeCad_DAPI_40x8bit_2016_11_07_siYap_4.tif	70			1886	Exp2_13317_DAPI_VeCad_Phalloidin_siYapTaz_5.tif	35
																															1878	3			1887	VeCad_DAPI_40x8bit_2016_11_07_siCTR_2.tif	33			1887	Exp3_27217_DAPI_VeCad_Phalloidin_siYapTaz_4.tif	53
																															1879	4			1888	VeCad_DAPI_40x8bit_2016_11_07_siYapTaz_5.tif	13			1888	Exp3_27217_DAPI_VeCad_Phalloidin_siYap_5.tif	1
																															1880	2			1889	VeCad_DAPI_40x8bit_2016_11_07_siCTR_4.tif	73			1889	Exp2_13317_DAPI_VeCad_Phalloidin_siCTR_1.tif	19
																															1881	1			1890	VeCad_DAPI_40x8bit_2016_11_07_siCTR_4.tif	25			1890	Exp2_13317_DAPI_VeCad_Phalloidin_siCTR_3.tif	36
																															1882	2			1891	VeCad_DAPI_40x8bit_2016_11_07_siYap_1.tif	10			1891	Exp3_27217_DAPI_VeCad_Phalloidin_siYapTaz_3.tif	22
																															1883	4			1892	VeCad_DAPI_40x8bit_2016_11_07_siCTR_3.tif	72			1892	Exp2_13317_DAPI_VeCad_Phalloidin_siTaz_5.tif	0
																															1884	1			1893	VeCad_DAPI_40x8bit_2016_11_07_siYap_4.tif	19			1893	Exp3_27217_DAPI_VeCad_Phalloidin_siCTR_2.tif	0
																															1885	1			1894	VeCad_DAPI_40x8bit_2016_11_07_siYap_1.tif	14			1894	Exp2_13317_DAPI_VeCad_Phalloidin_siYap_5.tif	21
																															1886	0			1895	VeCad_DAPI_40x8bit_2016_11_07_siTaz_5.tif	37			1895	Exp3_27217_DAPI_VeCad_Phalloidin_siCTR_4.tif	31
																															1887	0			1896	VeCad_DAPI_40x8bit_2016_11_07_siYap_5.tif	11			1896	Exp3_27217_DAPI_VeCad_Phalloidin_siYap_3.tif	22
																															1888	0			1897	VeCad_DAPI_40x8bit_2016_11_07_siCTR_4.tif	39			1897	Exp3_27217_DAPI_VeCad_Phalloidin_siCTR_4.tif	52
																															1889	2			1898	VeCad_DAPI_40x8bit_2016_11_07_siYapTaz_2.tif	98			1898	Exp3_27217_DAPI_VeCad_Phalloidin_siYapTaz_2.tif	59
																															1890	4			1899	VeCad_DAPI_40x8bit_2016_11_07_siCTR_1.tif	86			1899	Exp2_13317_DAPI_VeCad_Phalloidin_siYapTaz_4.tif	72
																															1891	0			1900	VeCad_DAPI_40x8bit_2016_11_07_siYapTaz_1.tif	97			1900	Exp2_13317_DAPI_VeCad_Phalloidin_siTaz_5.tif	89
																															1892	3			1901	VeCad_DAPI_40x8bit_2016_11_07_siYap_5.tif	1			1901	Exp2_13317_DAPI_VeCad_Phalloidin_siTaz_4.tif	95
																															1893	3			1902	VeCad_DAPI_40x8bit_2016_11_07_siYapTaz_2.tif	3			1902	Exp3_27217_DAPI_VeCad_Phalloidin_siYap_1.tif	18
																															1894	0			1903	VeCad_DAPI_40x8bit_2016_11_07_siYap_2.tif	62			1903	Exp3_27217_DAPI_VeCad_Phalloidin_siCTR_5.tif	29
																															1895	4			1904	VeCad_DAPI_40x8bit_2016_11_07_siTaz_4.tif	41			1904	Exp2_13317_DAPI_VeCad_Phalloidin_siCTR_4.tif	32
																															1896	0			1905	VeCad_DAPI_40x8bit_2016_11_07_siCTR_4.tif	62			1905	Exp3_27217_DAPI_VeCad_Phalloidin_siCTR_5.tif	77
																															1897	0			1906	VeCad_DAPI_40x8bit_2016_11_07_siYap_1.tif	23			1906	Exp2_13317_DAPI_VeCad_Phalloidin_siTaz_1.tif	46
																															1898	0			1907	VeCad_DAPI_40x8bit_2016_11_07_siYap_5.tif	19			1907	Exp2_13317_DAPI_VeCad_Phalloidin_siYap_5.tif	83
																															1899	0			1908	VeCad_DAPI_40x8bit_2016_11_07_siYapTaz_4.tif	91			1908	Exp3_27217_DAPI_VeCad_Phalloidin_siYapTaz_1.tif	25
																															1900	0			1909	VeCad_DAPI_40x8bit_2016_11_07_siCTR_5.tif	70			1909	Exp2_13317_DAPI_VeCad_Phalloidin_siTaz_4.tif	9
																															1901	1			1910	VeCad_DAPI_40x8bit_2016_11_07_siTaz_4.tif	59			1910	Exp2_13317_DAPI_VeCad_Phalloidin_siTaz_3.tif	15
																															1902	1			1911	VeCad_DAPI_40x8bit_2016_11_07_siTaz_3.tif	59			1911	Exp3_27217_DAPI_VeCad_Phalloidin_siYap_1.tif	48
																															1903	5			1912	VeCad_DAPI_40x8bit_2016_11_07_siYapTaz_1.tif	36			1912	Exp2_13317_DAPI_VeCad_Phalloidin_siYapTaz_1.tif	37
																															1904	2			1913	VeCad_DAPI_40x8bit_2016_11_07_siYap_1.tif	56			1913	Exp3_27217_DAPI_VeCad_Phalloidin_siYapTaz_1.tif	67
																															1905	5			1914	VeCad_DAPI_40x8bit_2016_11_07_siTaz_4.tif	16			1914	Exp2_13317_DAPI_VeCad_Phalloidin_siCTR_5.tif	7
																															1906	3			1915	VeCad_DAPI_40x8bit_2016_11_07_siYapTaz_3.tif	4			1915	Exp3_27217_DAPI_VeCad_Phalloidin_siYapTaz_1.tif	30
																															1907	0			1916	VeCad_DAPI_40x8bit_2016_11_07_siCTR_3.tif	99			1916	Exp2_13317_DAPI_VeCad_Phalloidin_siCTR_3.tif	41
																															1908	1			1917	VeCad_DAPI_40x8bit_2016_11_07_siCTR_2.tif	29			1917	Exp3_27217_DAPI_VeCad_Phalloidin_siYapTaz_5.tif	57
																															1909	1			1918	VeCad_DAPI_40x8bit_2016_11_07_siYap_1.tif	72			1918	Exp2_13317_DAPI_VeCad_Phalloidin_siYapTaz_5.tif	64
																															1910	3			1919	VeCad_DAPI_40x8bit_2016_11_07_siYap_1.tif	3			1919	Exp2_13317_DAPI_VeCad_Phalloidin_siYap_5.tif	93
																															1911	0			1920	VeCad_DAPI_40x8bit_2016_11_07_siTaz_3.tif	91			1920	Exp3_27217_DAPI_VeCad_Phalloidin_siYap_4.tif	42
																															1912	0			1921	VeCad_DAPI_40x8bit_2016_11_07_siYapTaz_1.tif	18			1921	Exp3_27217_DAPI_VeCad_Phalloidin_siYapTaz_4.tif	77
																															1913	0			1922	VeCad_DAPI_40x8bit_2016_11_07_siTaz_4.tif	71			1922	Exp2_13317_DAPI_VeCad_Phalloidin_siTaz_2.tif	10
																															1914	4			1923	VeCad_DAPI_40x8bit_2016_11_07_siYapTaz_4.tif	59			1923	Exp3_27217_DAPI_VeCad_Phalloidin_siYapTaz_5.tif	69
																															1915	0			1924	VeCad_DAPI_40x8bit_2016_11_07_siYap_4.tif	66			1924	Exp2_13317_DAPI_VeCad_Phalloidin_siCTR_3.tif	82
																															1916	4			1925	VeCad_DAPI_40x8bit_2016_11_07_siYap_5.tif	96			1925	Exp2_13317_DAPI_VeCad_Phalloidin_siCTR_5.tif	26
																															1917	0			1926	VeCad_DAPI_40x8bit_2016_11_07_siTaz_1.tif	89			1926	Exp3_27217_DAPI_VeCad_Phalloidin_siCTR_5.tif	74
																															1918	2			1927	VeCad_DAPI_40x8bit_2016_11_07_siTaz_2.tif	14			1927	Exp2_13317_DAPI_VeCad_Phalloidin_siCTR_2.tif	75
																															1919	0			1928	VeCad_DAPI_40x8bit_2016_11_07_siYap_2.tif	51			1928	Exp2_13317_DAPI_VeCad_Phalloidin_siTaz_4.tif	87
																															1920	1			1929	VeCad_DAPI_40x8bit_2016_11_07_siYap_2.tif	42			1929	Exp2_13317_DAPI_VeCad_Phalloidin_siYapTaz_3.tif	71
																															1921	0			1930	VeCad_DAPI_40x8bit_2016_11_07_siCTR_3.tif	81			1930	Exp2_13317_DAPI_VeCad_Phalloidin_siTaz_3.tif	78
																															1922	5			1931	VeCad_DAPI_40x8bit_2016_11_07_siYap_1.tif	77			1931	Exp3_27217_DAPI_VeCad_Phalloidin_siYapTaz_5.tif	89
																															1923	0			1932	VeCad_DAPI_40x8bit_2016_11_07_siYapTaz_4.tif	55			1932	Exp3_27217_DAPI_VeCad_Phalloidin_siCTR_2.tif	24
																															1924	3			1933	VeCad_DAPI_40x8bit_2016_11_07_siCTR_4.tif	83			1933	Exp3_27217_DAPI_VeCad_Phalloidin_siYapTaz_5.tif	53
																															1925	3			1934	VeCad_DAPI_40x8bit_2016_11_07_siCTR_5.tif	89			1934	Exp3_27217_DAPI_VeCad_Phalloidin_siYap_2.tif	21
																															1926	4			1935	VeCad_DAPI_40x8bit_2016_11_07_siCTR_5.tif	16			1935	Exp2_13317_DAPI_VeCad_Phalloidin_siYap_2.tif	28
																															1927	0			1936	VeCad_DAPI_40x8bit_2016_11_07_siCTR_4.tif	29			1936	Exp2_13317_DAPI_VeCad_Phalloidin_siYap_4.tif	30
																															1928	0			1937	VeCad_DAPI_40x8bit_2016_11_07_siYapTaz_5.tif	51			1937	Exp2_13317_DAPI_VeCad_Phalloidin_siYapTaz_5.tif	54
																															1929	0			1938	VeCad_DAPI_40x8bit_2016_11_07_siTaz_5.tif	23			1938	Exp3_27217_DAPI_VeCad_Phalloidin_siYapTaz_3.tif	30
																															1930	0			1939	VeCad_DAPI_40x8bit_2016_11_07_siYap_2.tif	91			1939	Exp3_27217_DAPI_VeCad_Phalloidin_siCTR_2.tif	74
																															1931	1			1940	VeCad_DAPI_40x8bit_2016_11_07_siTaz_1.tif	36			1940	Exp3_27217_DAPI_VeCad_Phalloidin_siYapTaz_3.tif	19
																															1932	0			1941	VeCad_DAPI_40x8bit_2016_11_07_siYapTaz_2.tif	86			1941	Exp3_27217_DAPI_VeCad_Phalloidin_siYapTaz_5.tif	27
																															1933	1			1942	VeCad_DAPI_40x8bit_2016_11_07_siYap_3.tif	80			1942	Exp2_13317_DAPI_VeCad_Phalloidin_siYap_2.tif	60
																															1934	1			1943	VeCad_DAPI_40x8bit_2016_11_07_siYapTaz_4.tif	83			1943	Exp3_27217_DAPI_VeCad_Phalloidin_siYap_1.tif	20
																															1935	0			1944	VeCad_DAPI_40x8bit_2016_11_07_siCTR_2.tif	87			1944	Exp3_27217_DAPI_VeCad_Phalloidin_siCTR_3.tif	44
																															1936	1			1945	VeCad_DAPI_40x8bit_2016_11_07_siYap_3.tif	3			1945	Exp2_13317_DAPI_VeCad_Phalloidin_siCTR_1.tif	3
																															1937	0			1946	VeCad_DAPI_40x8bit_2016_11_07_siYapTaz_2.tif	92			1946	Exp2_13317_DAPI_VeCad_Phalloidin_siTaz_3.tif	16
																															1938	5			1947	VeCad_DAPI_40x8bit_2016_11_07_siCTR_4.tif	58			1947	Exp2_13317_DAPI_VeCad_Phalloidin_siYapTaz_2.tif	33
																															1939	1			1948	VeCad_DAPI_40x8bit_2016_11_07_siCTR_4.tif	40			1948	Exp3_27217_DAPI_VeCad_Phalloidin_siYap_4.tif	17
																															1940	0			1949	VeCad_DAPI_40x8bit_2016_11_07_siCTR_5.tif	40			1949	Exp3_27217_DAPI_VeCad_Phalloidin_siYapTaz_3.tif	99
																															1941	1			1950	VeCad_DAPI_40x8bit_2016_11_07_siTaz_1.tif	15			1950	Exp3_27217_DAPI_VeCad_Phalloidin_siCTR_2.tif	8
																															1942	0			1951	VeCad_DAPI_40x8bit_2016_11_07_siYap_3.tif	93			1951	Exp2_13317_DAPI_VeCad_Phalloidin_siYapTaz_3.tif	76
																															1943	1			1952	VeCad_DAPI_40x8bit_2016_11_07_siYap_2.tif	39			1952	Exp3_27217_DAPI_VeCad_Phalloidin_siYap_2.tif	82
																															1944	3			1953	VeCad_DAPI_40x8bit_2016_11_07_siTaz_1.tif	5			1953	Exp3_27217_DAPI_VeCad_Phalloidin_siCTR_4.tif	38
																															1945	0			1954	VeCad_DAPI_40x8bit_2016_11_07_siYap_3.tif	67			1954	Exp2_13317_DAPI_VeCad_Phalloidin_siYap_2.tif	51
																															1946	0			1955	VeCad_DAPI_40x8bit_2016_11_07_siTaz_5.tif	24			1955	Exp3_27217_DAPI_VeCad_Phalloidin_siYap_3.tif	87
																															1947	1			1956	VeCad_DAPI_40x8bit_2016_11_07_siYap_3.tif	32			1956	Exp2_13317_DAPI_VeCad_Phalloidin_siYapTaz_1.tif	19
																															1948	0			1957	VeCad_DAPI_40x8bit_2016_11_07_siYapTaz_5.tif	16			1957	Exp2_13317_DAPI_VeCad_Phalloidin_siYapTaz_5.tif	30
																															1949	1			1958	VeCad_DAPI_40x8bit_2016_11_07_siYap_2.tif	40			1958	Exp3_27217_DAPI_VeCad_Phalloidin_siCTR_5.tif	91
																															1950	3			1959	VeCad_DAPI_40x8bit_2016_11_07_siCTR_1.tif	37			1959	Exp2_13317_DAPI_VeCad_Phalloidin_siTaz_1.tif	17
																															1951	3			1960	VeCad_DAPI_40x8bit_2016_11_07_siYapTaz_3.tif	55			1960	Exp2_13317_DAPI_VeCad_Phalloidin_siTaz_1.tif	99
																															1952	0			1961	VeCad_DAPI_40x8bit_2016_11_07_siCTR_4.tif	94			1961	Exp2_13317_DAPI_VeCad_Phalloidin_siYapTaz_2.tif	95
																															1953	5			1962	VeCad_DAPI_40x8bit_2016_11_07_siYapTaz_3.tif	16			1962	Exp3_27217_DAPI_VeCad_Phalloidin_siYap_5.tif	10
																															1954	1			1963	VeCad_DAPI_40x8bit_2016_11_07_siCTR_2.tif	6			1963	Exp2_13317_DAPI_VeCad_Phalloidin_siCTR_1.tif	74
																															1955	0			1964	VeCad_DAPI_40x8bit_2016_11_07_siYapTaz_1.tif	84			1964	Exp2_13317_DAPI_VeCad_Phalloidin_siYap_5.tif	95
																															1956	3			1965	VeCad_DAPI_40x8bit_2016_11_07_siCTR_4.tif	77			1965	Exp3_27217_DAPI_VeCad_Phalloidin_siYapTaz_5.tif	42
																															1957	0			1966	VeCad_DAPI_40x8bit_2016_11_07_siCTR_1.tif	87			1966	Exp2_13317_DAPI_VeCad_Phalloidin_siCTR_4.tif	66
																															1958	4			1967	VeCad_DAPI_40x8bit_2016_11_07_siCTR_1.tif	19			1967	Exp2_13317_DAPI_VeCad_Phalloidin_siCTR_5.tif	42
																															1959	0			1968	VeCad_DAPI_40x8bit_2016_11_07_siYap_1.tif	51			1968	Exp3_27217_DAPI_VeCad_Phalloidin_siYapTaz_2.tif	84
																															1960	0			1969	VeCad_DAPI_40x8bit_2016_11_07_siYap_3.tif	15			1969	Exp3_27217_DAPI_VeCad_Phalloidin_siYapTaz_5.tif	58
																															1961	2			1970	VeCad_DAPI_40x8bit_2016_11_07_siTaz_4.tif	33			1970	Exp3_27217_DAPI_VeCad_Phalloidin_siYap_3.tif	63
																															1962	1			1971	VeCad_DAPI_40x8bit_2016_11_07_siYapTaz_2.tif	0			1971	Exp2_13317_DAPI_VeCad_Phalloidin_siTaz_3.tif	99
																															1963	2			1972	VeCad_DAPI_40x8bit_2016_11_07_siYapTaz_3.tif	22			1972	Exp2_13317_DAPI_VeCad_Phalloidin_siTaz_2.tif	4
																															1964	0			1973	VeCad_DAPI_40x8bit_2016_11_07_siTaz_2.tif	85			1973	Exp2_13317_DAPI_VeCad_Phalloidin_siYap_5.tif	18
																															1965	0			1974	VeCad_DAPI_40x8bit_2016_11_07_siYapTaz_1.tif	43			1974	Exp3_27217_DAPI_VeCad_Phalloidin_siYap_3.tif	43
																															1966	0			1975	VeCad_DAPI_40x8bit_2016_11_07_siYapTaz_4.tif	17			1975	Exp2_13317_DAPI_VeCad_Phalloidin_siTaz_3.tif	9
																															1967	2			1976	VeCad_DAPI_40x8bit_2016_11_07_siCTR_4.tif	23			1976	Exp2_13317_DAPI_VeCad_Phalloidin_siYapTaz_1.tif	48
																															1968	0			1977	VeCad_DAPI_40x8bit_2016_11_07_siTaz_2.tif	21			1977	Exp3_27217_DAPI_VeCad_Phalloidin_siYap_2.tif	12
																															1969	1			1978	VeCad_DAPI_40x8bit_2016_11_07_siTaz_4.tif	95			1978	Exp2_13317_DAPI_VeCad_Phalloidin_siTaz_2.tif	76
																															1970	0			1979	VeCad_DAPI_40x8bit_2016_11_07_siTaz_2.tif	42			1979	Exp2_13317_DAPI_VeCad_Phalloidin_siTaz_2.tif	65
																															1971	2			1980	VeCad_DAPI_40x8bit_2016_11_07_siYapTaz_2.tif	22			1980	Exp3_27217_DAPI_VeCad_Phalloidin_siCTR_5.tif	18
																															1972	0			1981	VeCad_DAPI_40x8bit_2016_11_07_siCTR_5.tif	74			1981	Exp2_13317_DAPI_VeCad_Phalloidin_siYap_4.tif	39
																															1973	0			1982	VeCad_DAPI_40x8bit_2016_11_07_siYap_2.tif	36			1982	Exp2_13317_DAPI_VeCad_Phalloidin_siYapTaz_2.tif	6
																															1974	1			1983	VeCad_DAPI_40x8bit_2016_11_07_siYapTaz_2.tif	10			1983	Exp2_13317_DAPI_VeCad_Phalloidin_siCTR_2.tif	23
																															1975	2			1984	VeCad_DAPI_40x8bit_2016_11_07_siTaz_5.tif	94			1984	Exp2_13317_DAPI_VeCad_Phalloidin_siCTR_4.tif	17
																															1976	0			1985	VeCad_DAPI_40x8bit_2016_11_07_siYap_3.tif	43			1985	Exp2_13317_DAPI_VeCad_Phalloidin_siYap_1.tif	67
[truncated: 1,514 more rows]

## Sheet: Figure 5G
Figure 5G - Permeability of YAP, TAZ and YAP/TAZ knockdown monolayers of HUVECs to 250kDa fluorescent dextran molecules
	Permeability at 6h	siCTR			siYap			siTaz			siYapTaz
	EXP1	47.905	83.824	50.384	55.733	50.412	no cells	94.138	54.209	no cells	76.965	51.704	47.559
	EXP2	40.172	144.963	62.894	41.689	50.106	47.65	61.16	48.416	64.796	84.232	73.915	75.532
	EXP3	44.734	42.775	53.228	54.119	43.177	45.052	51.294	51.086	60.995	67.399	61.823	73.356
	EXP4	29.799	26.93	27.395	39.815	41.586	43.523	58.432	46.27	52.582	103.384	58.575	58.515
	unit- RFU
	outliers
			p
	t-test	CTR vs YAP	0.9619	ns
		CTR vs TAZ	0.1444	ns
		CTR vs YAPTAZ	0.0024	**
	NOTE: one aliquot of 10uL was removed from bottom well and diluted in 90uL of PBS before quantification in fluorescent plate reader

## Sheet: Figure 5K
Figure 5K, Quantification of junctional turnover in YAP/TAZ knockdown cells and control
ANALYSIS																	Patches classification																	Patches solutions
Turnover classification																	EXP1								EXP2 and 3
Counts from the 3 independent experiments for siCTR and siYap+siTAz																		1	Linear		Junctional turnover (colour)					Junctional morphology			Junctional turnover (colour)					EXP1					EXP2 and 3
																		2	Thick		1	Post-stained VE-Cadherin (newer junction)				1	Linear junction		1	Post-stained VE-Cadherin (newer junction)				patch_number	image_name	patch_number_in_image			patch_number	image_name	patch_number_in_image
			Counts	% of total patches				Counts	% of total patches									3	Thick- reticular		2	Pre-labbeled + Post-stained VE-Cadherin				2	Thick junction		2	Pre-labbeled + Post-stained VE-Cadherin				0	MAX_No EGTA - 2h CM - siYapTaz - 3.tif	44			0	Exp2_17517_30minpulse_2hrecovery_VeCad488staining_VeCad647prelabbeled_DAPI_siYapTaz_4.tif	23
siCTR	High turnover (green)	Exp1	99	43.0435		siYapTaz	High turnover (green)	Exp1	23	11.3861								4	Reticular		3	Pre-labbeled VE-Cadherin (older junction)				3	Thick - reticular		3	Pre-labbeled VE-Cadherin (older junction)				1	MAX_No EGTA - 2h CM - siYapTaz - 1.tif	0			1	Exp2_17517_30minpulse_2hrecovery_VeCad488staining_VeCad647prelabbeled_DAPI_siCTR_4.tif	90
		Exp2	126	57.7982				Exp2	11	5.78947								5	Fingers							4	Reticular							2	MAX_No EGTA - 2h CM - siYapTaz - 3.tif	66			2	Exp2_17517_30minpulse_2hrecovery_VeCad488staining_VeCad647prelabbeled_DAPI_siCTR_4.tif	76
		Exp3	29	31.1828				Exp3	20	25.974																5	Fingers							3	MAX_No EGTA - 2h CM - siYapTaz - 5.tif	31			3	Exp2_17517_30minpulse_2hrecovery_VeCad488staining_VeCad647prelabbeled_DAPI_siCTR_1.tif	54
																	Patch #	Junction Morphology	Colour		Junction Morphology	Colour												4	MAX_No EGTA - 2h CM - siCTR - 2.tif	25			4	Exp3_19517_30minpulse_2hrecovery_VeCad488staining_VeCad647prelabbeled_DAPI_siYapTaz_1.tif	81
	Intermediate turnover (yellow)	Exp1	52	22.6087			Intermediate turnover (yellow)	Exp1	52	25.7426							0	2	2						Patch #	Junction Morphology	Colour		Junction Morphology	Colour				5	MAX_No EGTA - 2h CM - siCTR - 1.tif	30			5	Exp3_19517_30minpulse_2hrecovery_VeCad488staining_VeCad647prelabbeled_DAPI_siYapTaz_5.tif	19
		Exp2	55	25.2294				Exp2	55	28.9474							1	1	2						0	0								6	MAX_No EGTA - 2h CM - siYapTaz - 1.tif	84			6	Exp3_19517_30minpulse_2hrecovery_VeCad488staining_VeCad647prelabbeled_DAPI_siYapTaz_5.tif	28
		Exp3	22	23.6559				Exp3	22	28.5714							2	2	2						1	2	1							7	MAX_No EGTA - 2h CM - siYapTaz - 2.tif	88			7	Exp3_19517_30minpulse_2hrecovery_VeCad488staining_VeCad647prelabbeled_DAPI_siCTR_5.tif	58
																	3	5	2						2	1	3		2	1				8	Exp1_130317_No EGTA_siYapTaz_5.tif	90			8	Exp3_19517_30minpulse_2hrecovery_VeCad488staining_VeCad647prelabbeled_DAPI_siCTR_4.tif	13
	Low turnover (red)	Exp1	79	34.3478			Low turnover (red)	Exp1	127	62.8713							4	4	1						3	4	1							9	Exp1_130317_No EGTA_siCTR_5.tif	52			9	Exp2_17517_30minpulse_2hrecovery_VeCad488staining_VeCad647prelabbeled_DAPI_siCTR_1.tif	63
		Exp2	37	16.9725				Exp2	124	65.2632							5	0							4	5	2							10	MAX_No EGTA - 2h CM - siCTR - 2.tif	86			10	Exp2_17517_30minpulse_2hrecovery_VeCad488staining_VeCad647prelabbeled_DAPI_siYapTaz_1.tif	98
		Exp3	42	45.1613				Exp3	35	45.4545							6	1	1						5	1	2							11	Exp1_130317_No EGTA_siCTR_1.tif	22			11	Exp2_17517_30minpulse_2hrecovery_VeCad488staining_VeCad647prelabbeled_DAPI_siCTR_2.tif	96
																	7	1	3						6	1	3							12	Exp1_130317_No EGTA_siCTR_5.tif	65			12	Exp3_19517_30minpulse_2hrecovery_VeCad488staining_VeCad647prelabbeled_DAPI_siCTR_3.tif	6
	Total counts	Exp1	230				Total counts	Exp1	202								8	5	3						7	4	1							13	Exp1_130317_No EGTA_siCTR_5.tif	64			13	Exp3_19517_30minpulse_2hrecovery_VeCad488staining_VeCad647prelabbeled_DAPI_siCTR_1.tif	12
		Exp2	218					Exp2	190								9	0	0						8	4	1							14	MAX_No EGTA - 2h CM - siYapTaz - 5.tif	32			14	Exp2_17517_30minpulse_2hrecovery_VeCad488staining_VeCad647prelabbeled_DAPI_siYapTaz_5.tif	79
		Exp3	93					Exp3	77								10	0	0						9	4	1							15	MAX_No EGTA - 2h CM - siCTR - 1.tif	41			15	Exp2_17517_30minpulse_2hrecovery_VeCad488staining_VeCad647prelabbeled_DAPI_siCTR_4.tif	56
																	11	5	3						10	1	3							16	Exp1_130317_No EGTA_siYapTaz_3.tif	91			16	Exp2_17517_30minpulse_2hrecovery_VeCad488staining_VeCad647prelabbeled_DAPI_siYapTaz_1.tif	81
																	12	2	2						11	0								17	MAX_No EGTA - 2h CM - siYapTaz - 5.tif	51			17	Exp3_19517_30minpulse_2hrecovery_VeCad488staining_VeCad647prelabbeled_DAPI_siYapTaz_1.tif	54
																	13	5	2						12	0								18	MAX_No EGTA - 2h CM - siCTR - 4.tif	20			18	Exp3_19517_30minpulse_2hrecovery_VeCad488staining_VeCad647prelabbeled_DAPI_siCTR_2.tif	24
																	14	0	0						13	0								19	MAX_No EGTA - 2h CM - siYapTaz - 4.tif	47			19	Exp2_17517_30minpulse_2hrecovery_VeCad488staining_VeCad647prelabbeled_DAPI_siYapTaz_1.tif	87
																	15	4	1		4	3			14	2	3							20	Exp1_130317_No EGTA_siYapTaz_2.tif	26			20	Exp2_17517_30minpulse_2hrecovery_VeCad488staining_VeCad647prelabbeled_DAPI_siCTR_3.tif	98
n=	3 independent experiments																16	0							15	4	1							21	MAX_No EGTA - 2h CM - siCTR - 4.tif	38			21	Exp3_19517_30minpulse_2hrecovery_VeCad488staining_VeCad647prelabbeled_DAPI_siCTR_2.tif	8
	5 images per experiment per condition																17	1	2		3	1			16	1	2							22	MAX_No EGTA - 2h CM - siCTR - 3.tif	44			22	Exp2_17517_30minpulse_2hrecovery_VeCad488staining_VeCad647prelabbeled_DAPI_siCTR_1.tif	36
	at least 70 patches analised per experiment per condition																18	1	3						17	0								23	MAX_No EGTA - 2h CM - siCTR - 4.tif	4			23	Exp3_19517_30minpulse_2hrecovery_VeCad488staining_VeCad647prelabbeled_DAPI_siYapTaz_1.tif	45
																	19	0	0						18	0								24	Exp1_130317_No EGTA_siCTR_3.tif	7			24	Exp2_17517_30minpulse_2hrecovery_VeCad488staining_VeCad647prelabbeled_DAPI_siCTR_1.tif	51
																	20	2	2						19	1	3							25	Exp1_130317_No EGTA_siCTR_3.tif	67			25	Exp2_17517_30minpulse_2hrecovery_VeCad488staining_VeCad647prelabbeled_DAPI_siYapTaz_5.tif	68
																	21	0							20	3	1							26	Exp1_130317_No EGTA_siYapTaz_4.tif	51			26	Exp3_19517_30minpulse_2hrecovery_VeCad488staining_VeCad647prelabbeled_DAPI_siCTR_5.tif	51
																	22	2	1						21	0								27	Exp1_130317_No EGTA_siYapTaz_5.tif	44			27	Exp2_17517_30minpulse_2hrecovery_VeCad488staining_VeCad647prelabbeled_DAPI_siCTR_5.tif	59
																	23	0							22	4	1		4	2				28	MAX_No EGTA - 2h CM - siYapTaz - 4.tif	90			28	Exp3_19517_30minpulse_2hrecovery_VeCad488staining_VeCad647prelabbeled_DAPI_siCTR_1.tif	80
																	24	0							23	5	2							29	Exp1_130317_No EGTA_siCTR_2.tif	79			29	Exp2_17517_30minpulse_2hrecovery_VeCad488staining_VeCad647prelabbeled_DAPI_siCTR_2.tif	0
Turnover + morphology classification																	25	1	2						24	0								30	MAX_No EGTA - 2h CM - siCTR - 3.tif	29			30	Exp2_17517_30minpulse_2hrecovery_VeCad488staining_VeCad647prelabbeled_DAPI_siCTR_4.tif	13
				counts	% of colour for the morphology category							% of colour for the morphology cathegory					26	1	3						25	1	2		5	3				31	Exp1_130317_No EGTA_siYapTaz_3.tif	23			31	Exp3_19517_30minpulse_2hrecovery_VeCad488staining_VeCad647prelabbeled_DAPI_siYapTaz_4.tif	73
siCTR	High turnover (green)	Straight	Exp1	7	15.2174		siYapTaz	High turnover (green)	Straight	Exp1	6	5.50459					27	0							26	0								32	Exp1_130317_No EGTA_siCTR_3.tif	58			32	Exp2_17517_30minpulse_2hrecovery_VeCad488staining_VeCad647prelabbeled_DAPI_siYapTaz_4.tif	87
			Exp2	5	27.7778					Exp2	6	4.54545					28	3	2						27	0								33	Exp1_130317_No EGTA_siYapTaz_4.tif	92			33	Exp3_19517_30minpulse_2hrecovery_VeCad488staining_VeCad647prelabbeled_DAPI_siCTR_4.tif	61
			Exp3	2	14.2857					Exp3	9	10.3448					29	5	2						28	0								34	MAX_No EGTA - 2h CM - siYapTaz - 4.tif	18			34	Exp2_17517_30minpulse_2hrecovery_VeCad488staining_VeCad647prelabbeled_DAPI_siCTR_3.tif	56
		Thick	Exp1	11	30.5556				Thick	Exp1	1	1.85185					30	0							29	4	2							35	MAX_No EGTA - 2h CM - siYapTaz - 4.tif	98			35	Exp3_19517_30minpulse_2hrecovery_VeCad488staining_VeCad647prelabbeled_DAPI_siCTR_2.tif	22
			Exp2	24	54.5455					Exp2	1	2.43902					31	5	3						30	0								36	MAX_No EGTA - 2h CM - siCTR - 2.tif	15			36	Exp2_17517_30minpulse_2hrecovery_VeCad488staining_VeCad647prelabbeled_DAPI_siYapTaz_1.tif	18
			Exp3	5	29.4118					Exp3	3	8.10811					32	4	1		4	3			31	0								37	Exp1_130317_No EGTA_siYapTaz_5.tif	23			37	Exp3_19517_30minpulse_2hrecovery_VeCad488staining_VeCad647prelabbeled_DAPI_siYapTaz_2.tif	78
		Thick-JAIL	Exp1	34	69.3878				Thick-JAIL	Exp1	5	29.4118					33	1	2						32	1	3							38	MAX_No EGTA - 2h CM - siCTR - 2.tif	46			38	Exp3_19517_30minpulse_2hrecovery_VeCad488staining_VeCad647prelabbeled_DAPI_siCTR_2.tif	80
			Exp2	61	70.1149					Exp2	2	20					34	1	2						33	0								39	Exp1_130317_No EGTA_siYapTaz_4.tif	8			39	Exp3_19517_30minpulse_2hrecovery_VeCad488staining_VeCad647prelabbeled_DAPI_siCTR_5.tif	38
			Exp3	8	24.2424					Exp3	1	10					35	0							34	0								40	Exp1_130317_No EGTA_siCTR_1.tif	20			40	Exp3_19517_30minpulse_2hrecovery_VeCad488staining_VeCad647prelabbeled_DAPI_siYapTaz_5.tif	20
		JAIL	Exp1	44	72.1311				JAIL	Exp1	8	50					36	3	1						35	0								41	Exp1_130317_No EGTA_siYapTaz_4.tif	17			41	Exp2_17517_30minpulse_2hrecovery_VeCad488staining_VeCad647prelabbeled_DAPI_siYapTaz_5.tif	91
			Exp2	31	62					Exp2	0	0					37	1	3						36	1	3							42	MAX_No EGTA - 2h CM - siCTR - 4.tif	85			42	Exp3_19517_30minpulse_2hrecovery_VeCad488staining_VeCad647prelabbeled_DAPI_siYapTaz_1.tif	48
			Exp3	12	52.1739					Exp3	0	0					38	0							37	5	2							43	MAX_No EGTA - 2h CM - siYapTaz - 5.tif	17			43	Exp2_17517_30minpulse_2hrecovery_VeCad488staining_VeCad647prelabbeled_DAPI_siYapTaz_3.tif	24
		Fingers	Exp1	3	7.89474				Fingers	Exp1	3	3.40909					39	1	3						38	0								44	MAX_No EGTA - 2h CM - siYapTaz - 5.tif	0			44	Exp3_19517_30minpulse_2hrecovery_VeCad488staining_VeCad647prelabbeled_DAPI_siYapTaz_2.tif	18
			Exp2	5	26.3158					Exp2	2	4					40	5	2		5	3			39	0								45	MAX_No EGTA - 2h CM - siYapTaz - 3.tif	1			45	Exp3_19517_30minpulse_2hrecovery_VeCad488staining_VeCad647prelabbeled_DAPI_siCTR_2.tif	78
			Exp3	2	33.3333					Exp3	7	14.8936					41	5	2						40	5	3							46	MAX_No EGTA - 2h CM - siYapTaz - 2.tif	93			46	Exp2_17517_30minpulse_2hrecovery_VeCad488staining_VeCad647prelabbeled_DAPI_siYapTaz_3.tif	62
	Intermediate turnover (Yellow)	Straight	Exp1	16	34.7826			Intermediate turnover (Yellow)	Straight	Exp1	60	55.0459					42	0							41	5	2							47	MAX_No EGTA - 2h CM - siYapTaz - 5.tif	50			47	Exp2_17517_30minpulse_2hrecovery_VeCad488staining_VeCad647prelabbeled_DAPI_siYapTaz_5.tif	17
			Exp2	5	27.7778					Exp2	49	37.1212					43	0							42	5	3							48	Exp1_130317_No EGTA_siCTR_1.tif	9			48	Exp3_19517_30minpulse_2hrecovery_VeCad488staining_VeCad647prelabbeled_DAPI_siCTR_3.tif	51
			Exp3	6	42.8571					Exp3	63	72.4138					44	2	2						43	0								49	MAX_No EGTA - 2h CM - siYapTaz - 4.tif	28			49	Exp3_19517_30minpulse_2hrecovery_VeCad488staining_VeCad647prelabbeled_DAPI_siCTR_3.tif	91
		Thick	Exp1	15	41.6667				Thick	Exp1	38	70.3704					45	1	3		2	2			44	5	3							50	Exp1_130317_No EGTA_siCTR_5.tif	11			50	Exp3_19517_30minpulse_2hrecovery_VeCad488staining_VeCad647prelabbeled_DAPI_siYapTaz_3.tif	87
n=			Exp2	15	34.0909		n=			Exp2	20	48.7805					46	1	2						45	0								51	Exp1_130317_No EGTA_siYapTaz_4.tif	32			51	Exp3_19517_30minpulse_2hrecovery_VeCad488staining_VeCad647prelabbeled_DAPI_siCTR_5.tif	48
			Exp3	8	47.0588					Exp3	32	86.4865					47	5	2						46	0								52	Exp1_130317_No EGTA_siCTR_5.tif	16			52	Exp3_19517_30minpulse_2hrecovery_VeCad488staining_VeCad647prelabbeled_DAPI_siCTR_2.tif	60
		Thick-JAIL	Exp1	8	16.3265				Thick-JAIL	Exp1	9	52.9412					48	1	3						47	1	2							53	Exp1_130317_No EGTA_siYapTaz_2.tif	93			53	Exp2_17517_30minpulse_2hrecovery_VeCad488staining_VeCad647prelabbeled_DAPI_siYapTaz_4.tif	18
			Exp2	20	22.9885					Exp2	7	70					49	1	3						48	0								54	Exp1_130317_No EGTA_siYapTaz_1.tif	31			54	Exp2_17517_30minpulse_2hrecovery_VeCad488staining_VeCad647prelabbeled_DAPI_siCTR_1.tif	98
			Exp3	4	12.1212					Exp3	9	90					50	4	3						49	0								55	Exp1_130317_No EGTA_siCTR_4.tif	14			55	Exp2_17517_30minpulse_2hrecovery_VeCad488staining_VeCad647prelabbeled_DAPI_siCTR_3.tif	65
		JAIL	Exp1	4	6.55738				JAIL	Exp1	4	25					51	2	3						50	0								56	MAX_No EGTA - 2h CM - siCTR - 2.tif	37			56	Exp2_17517_30minpulse_2hrecovery_VeCad488staining_VeCad647prelabbeled_DAPI_siCTR_5.tif	42
			Exp2	11	22					Exp2	0	0					52	0							51	3	2							57	Exp1_130317_No EGTA_siCTR_5.tif	82			57	Exp3_19517_30minpulse_2hrecovery_VeCad488staining_VeCad647prelabbeled_DAPI_siYapTaz_4.tif	15
			Exp3	4	17.3913					Exp3	1	100					53	1	2						52	0								58	MAX_No EGTA - 2h CM - siCTR - 1.tif	37			58	Exp2_17517_30minpulse_2hrecovery_VeCad488staining_VeCad647prelabbeled_DAPI_siCTR_2.tif	14
		Fingers	Exp1	9	23.6842				Fingers	Exp1	23	26.1364					54	2	2						53	0								59	MAX_No EGTA - 2h CM - siYapTaz - 5.tif	4			59	Exp2_17517_30minpulse_2hrecovery_VeCad488staining_VeCad647prelabbeled_DAPI_siYapTaz_2.tif	22
			Exp2	4	21.0526					Exp2	22	44					55	0							54	3	1							60	MAX_No EGTA - 2h CM - siCTR - 1.tif	63			60	Exp2_17517_30minpulse_2hrecovery_VeCad488staining_VeCad647prelabbeled_DAPI_siYapTaz_4.tif	6
			Exp3	0	0					Exp3	22	46.8085					56	3	1		3	2			55	0								61	Exp1_130317_No EGTA_siCTR_2.tif	48			61	Exp3_19517_30minpulse_2hrecovery_VeCad488staining_VeCad647prelabbeled_DAPI_siCTR_1.tif	37
	Low turnover (Red)	Straight	Exp1	23	50			Low turnover (Red)	Straight	Exp1	43	39.4495					57	3	3						56	0								62	Exp1_130317_No EGTA_siYapTaz_2.tif	70			62	Exp3_19517_30minpulse_2hrecovery_VeCad488staining_VeCad647prelabbeled_DAPI_siCTR_1.tif	55
			Exp2	8	44.4444					Exp2	77	58.3333					58	3	1						57	0								63	MAX_No EGTA - 2h CM - siCTR - 3.tif	26			63	Exp2_17517_30minpulse_2hrecovery_VeCad488staining_VeCad647prelabbeled_DAPI_siYapTaz_3.tif	63
			Exp3	6	42.8571					Exp3	15	17.2414					59	0							58	5	3							64	Exp1_130317_No EGTA_siYapTaz_1.tif	70			64	Exp2_17517_30minpulse_2hrecovery_VeCad488staining_VeCad647prelabbeled_DAPI_siYapTaz_4.tif	51
		Thick	Exp1	10	27.7778				Thick	Exp1	15	27.7778					60	0							59	3	2							65	Exp1_130317_No EGTA_siYapTaz_2.tif	96			65	Exp3_19517_30minpulse_2hrecovery_VeCad488staining_VeCad647prelabbeled_DAPI_siYapTaz_4.tif	31
			Exp2	5	11.3636					Exp2	20	48.7805					61	1							60	0								66	MAX_No EGTA - 2h CM - siYapTaz - 1.tif	64			66	Exp3_19517_30minpulse_2hrecovery_VeCad488staining_VeCad647prelabbeled_DAPI_siCTR_2.tif	63
			Exp3	4	23.5294					Exp3	2	5.40541					62	0							61	0								67	MAX_No EGTA - 2h CM - siYapTaz - 1.tif	70			67	Exp3_19517_30minpulse_2hrecovery_VeCad488staining_VeCad647prelabbeled_DAPI_siYapTaz_3.tif	59
		Thick-JAIL	Exp1	7	14.2857				Thick-JAIL	Exp1	3	17.6471					63	3	1						62	1	3							68	MAX_No EGTA - 2h CM - siYapTaz - 2.tif	32			68	Exp3_19517_30minpulse_2hrecovery_VeCad488staining_VeCad647prelabbeled_DAPI_siYapTaz_5.tif	4
			Exp2	6	6.89655					Exp2	1	10					64	1	3						63	2	2							69	MAX_No EGTA - 2h CM - siCTR - 4.tif	82			69	Exp2_17517_30minpulse_2hrecovery_VeCad488staining_VeCad647prelabbeled_DAPI_siYapTaz_5.tif	85
			Exp3	21	63.6364					Exp3	0	0					65	2	3						64	1	3							70	Exp1_130317_No EGTA_siCTR_5.tif	39			70	Exp3_19517_30minpulse_2hrecovery_VeCad488staining_VeCad647prelabbeled_DAPI_siYapTaz_4.tif	63
		JAIL	Exp1	13	21.3115				JAIL	Exp1	4	25					66	0							65	0								71	MAX_No EGTA - 2h CM - siYapTaz - 3.tif	26			71	Exp2_17517_30minpulse_2hrecovery_VeCad488staining_VeCad647prelabbeled_DAPI_siYapTaz_5.tif	88
			Exp2	8	16					Exp2	0	0					67	3	3						66	0								72	Exp1_130317_No EGTA_siYapTaz_1.tif	7			72	Exp3_19517_30minpulse_2hrecovery_VeCad488staining_VeCad647prelabbeled_DAPI_siYapTaz_5.tif	67
			Exp3	7	30.4348					Exp3	0	0					68	0							67	0								73	MAX_No EGTA - 2h CM - siYapTaz - 5.tif	2			73	Exp3_19517_30minpulse_2hrecovery_VeCad488staining_VeCad647prelabbeled_DAPI_siYapTaz_4.tif	84
		Fingers	Exp1	26	68.4211				Fingers	Exp1	62	70.4545					69	2	2						68	0								74	Exp1_130317_No EGTA_siYapTaz_3.tif	63			74	Exp2_17517_30minpulse_2hrecovery_VeCad488staining_VeCad647prelabbeled_DAPI_siCTR_2.tif	50
			Exp2	10	52.6316					Exp2	26	52					70	3	1		3	1			69	0								75	Exp1_130317_No EGTA_siCTR_1.tif	49			75	Exp2_17517_30minpulse_2hrecovery_VeCad488staining_VeCad647prelabbeled_DAPI_siCTR_3.tif	75
			Exp3	4	66.6667					Exp3	18	38.2979					71	1	2						70	5	2							76	MAX_No EGTA - 2h CM - siYapTaz - 4.tif	66			76	Exp3_19517_30minpulse_2hrecovery_VeCad488staining_VeCad647prelabbeled_DAPI_siCTR_5.tif	90
																	72	5	3						71	2	3							77	Exp1_130317_No EGTA_siCTR_5.tif	3			77	Exp2_17517_30minpulse_2hrecovery_VeCad488staining_VeCad647prelabbeled_DAPI_siYapTaz_4.tif	16
																	73	1	2						72	0								78	Exp1_130317_No EGTA_siCTR_4.tif	8			78	Exp3_19517_30minpulse_2hrecovery_VeCad488staining_VeCad647prelabbeled_DAPI_siCTR_4.tif	68
			tota # patches	541						tota # patches	699						74	5	3						73	0								79	Exp1_130317_No EGTA_siCTR_3.tif	46			79	Exp3_19517_30minpulse_2hrecovery_VeCad488staining_VeCad647prelabbeled_DAPI_siCTR_4.tif	59
																	75	0							74	0								80	Exp1_130317_No EGTA_siCTR_5.tif	53			80	Exp3_19517_30minpulse_2hrecovery_VeCad488staining_VeCad647prelabbeled_DAPI_siCTR_3.tif	57
																	76	4	1						75	0								81	MAX_No EGTA - 2h CM - siYapTaz - 5.tif	81			81	Exp2_17517_30minpulse_2hrecovery_VeCad488staining_VeCad647prelabbeled_DAPI_siCTR_5.tif	34
		# patches	Straight	Exp1	46				# patches	Straight	Exp1	109					77	5	2						76	4	3							82	MAX_No EGTA - 2h CM - siCTR - 1.tif	48			82	Exp2_17517_30minpulse_2hrecovery_VeCad488staining_VeCad647prelabbeled_DAPI_siYapTaz_2.tif	5
				Exp2	18						Exp2	132					78	4	1						77	0								83	Exp1_130317_No EGTA_siYapTaz_2.tif	46			83	Exp2_17517_30minpulse_2hrecovery_VeCad488staining_VeCad647prelabbeled_DAPI_siCTR_2.tif	7
				Exp3	14						Exp3	87					79	0							78	5	3							84	Exp1_130317_No EGTA_siYapTaz_5.tif	49			84	Exp3_19517_30minpulse_2hrecovery_VeCad488staining_VeCad647prelabbeled_DAPI_siYapTaz_3.tif	24
			Thick	Exp1	36					Thick	Exp1	54					80	2	3						79	5	3							85	MAX_No EGTA - 2h CM - siYapTaz - 3.tif	23			85	Exp2_17517_30minpulse_2hrecovery_VeCad488staining_VeCad647prelabbeled_DAPI_siCTR_5.tif	33
				Exp2	44						Exp2	41					81	1	2						80	5	1							86	MAX_No EGTA - 2h CM - siCTR - 2.tif	0			86	Exp3_19517_30minpulse_2hrecovery_VeCad488staining_VeCad647prelabbeled_DAPI_siCTR_1.tif	87
				Exp3	17						Exp3	37					82	0	0						81	0								87	Exp1_130317_No EGTA_siYapTaz_2.tif	74			87	Exp2_17517_30minpulse_2hrecovery_VeCad488staining_VeCad647prelabbeled_DAPI_siCTR_3.tif	87
			Thick-JAIL	Exp1	49					Thick-JAIL	Exp1	17					83	5	3						82	0								88	Exp1_130317_No EGTA_siYapTaz_1.tif	77			88	Exp2_17517_30minpulse_2hrecovery_VeCad488staining_VeCad647prelabbeled_DAPI_siYapTaz_3.tif	20
				Exp2	87						Exp2	10					84	5	3						83	0								89	Exp1_130317_No EGTA_siYapTaz_5.tif	30			89	Exp3_19517_30minpulse_2hrecovery_VeCad488staining_VeCad647prelabbeled_DAPI_siYapTaz_3.tif	94
				Exp3	33						Exp3	10					85	5	2						84	5	3		1	1				90	Exp1_130317_No EGTA_siYapTaz_5.tif	48			90	Exp2_17517_30minpulse_2hrecovery_VeCad488staining_VeCad647prelabbeled_DAPI_siYapTaz_4.tif	26
			JAIL	Exp1	61					JAIL	Exp1	16					86	4	1						85	0								91	Exp1_130317_No EGTA_siYapTaz_1.tif	65			91	Exp3_19517_30minpulse_2hrecovery_VeCad488staining_VeCad647prelabbeled_DAPI_siYapTaz_3.tif	56
				Exp2	50						Exp2	0					87	0							86	0								92	Exp1_130317_No EGTA_siCTR_5.tif	21			92	Exp2_17517_30minpulse_2hrecovery_VeCad488staining_VeCad647prelabbeled_DAPI_siCTR_3.tif	49
				Exp3	23						Exp3	1					88	1	2						87	2	2							93	MAX_No EGTA - 2h CM - siCTR - 2.tif	45			93	Exp2_17517_30minpulse_2hrecovery_VeCad488staining_VeCad647prelabbeled_DAPI_siCTR_3.tif	37
			Fingers	Exp1	38					Fingers	Exp1	88					89	5	3						88	1	2							94	MAX_No EGTA - 2h CM - siCTR - 5.tif	70			94	Exp3_19517_30minpulse_2hrecovery_VeCad488staining_VeCad647prelabbeled_DAPI_siCTR_5.tif	25
				Exp2	19						Exp2	50					90	0							89	0								95	Exp1_130317_No EGTA_siYapTaz_2.tif	45			95	Exp3_19517_30minpulse_2hrecovery_VeCad488staining_VeCad647prelabbeled_DAPI_siCTR_1.tif	10
				Exp3	6						Exp3	47					91	1	3						90	0								96	Exp1_130317_No EGTA_siCTR_4.tif	27			96	Exp3_19517_30minpulse_2hrecovery_VeCad488staining_VeCad647prelabbeled_DAPI_siYapTaz_1.tif	41
																	92	0							91	2	1		5	1				97	MAX_No EGTA - 2h CM - siCTR - 1.tif	94			97	Exp3_19517_30minpulse_2hrecovery_VeCad488staining_VeCad647prelabbeled_DAPI_siCTR_3.tif	63
																	93	3	1						92	0								98	MAX_No EGTA - 2h CM - siYapTaz - 1.tif	45			98	Exp2_17517_30minpulse_2hrecovery_VeCad488staining_VeCad647prelabbeled_DAPI_siCTR_2.tif	35
																	94	0							93	0								99	Exp1_130317_No EGTA_siCTR_3.tif	73			99	Exp3_19517_30minpulse_2hrecovery_VeCad488staining_VeCad647prelabbeled_DAPI_siCTR_2.tif	64
																	95	5	2						94	3	3							100	MAX_No EGTA - 2h CM - siCTR - 2.tif	68			100	Exp2_17517_30minpulse_2hrecovery_VeCad488staining_VeCad647prelabbeled_DAPI_siYapTaz_1.tif	44
																	96	0							95	0								101	Exp1_130317_No EGTA_siYapTaz_4.tif	95			101	Exp3_19517_30minpulse_2hrecovery_VeCad488staining_VeCad647prelabbeled_DAPI_siCTR_5.tif	71
																	97	3	1						96	0								102	Exp1_130317_No EGTA_siCTR_4.tif	6			102	Exp3_19517_30minpulse_2hrecovery_VeCad488staining_VeCad647prelabbeled_DAPI_siCTR_2.tif	35
																	98	1	2						97	0								103	Exp1_130317_No EGTA_siYapTaz_5.tif	27			103	Exp3_19517_30minpulse_2hrecovery_VeCad488staining_VeCad647prelabbeled_DAPI_siCTR_5.tif	30
																	99	0							98	5	1							104	Exp1_130317_No EGTA_siYapTaz_2.tif	62			104	Exp2_17517_30minpulse_2hrecovery_VeCad488staining_VeCad647prelabbeled_DAPI_siCTR_4.tif	91
																	100	1	3						99	1	2							105	MAX_No EGTA - 2h CM - siCTR - 5.tif	22			105	Exp3_19517_30minpulse_2hrecovery_VeCad488staining_VeCad647prelabbeled_DAPI_siYapTaz_5.tif	59
																	101	1	2						100	1	3							106	MAX_No EGTA - 2h CM - siYapTaz - 2.tif	74			106	Exp3_19517_30minpulse_2hrecovery_VeCad488staining_VeCad647prelabbeled_DAPI_siCTR_1.tif	7
																	102	3	1		1	3			101	0								107	Exp1_130317_No EGTA_siCTR_4.tif	12			107	Exp2_17517_30minpulse_2hrecovery_VeCad488staining_VeCad647prelabbeled_DAPI_siYapTaz_4.tif	24
																	103	0							102	0								108	MAX_No EGTA - 2h CM - siYapTaz - 4.tif	52			108	Exp2_17517_30minpulse_2hrecovery_VeCad488staining_VeCad647prelabbeled_DAPI_siYapTaz_1.tif	9
																	104	5	3						103	0								109	MAX_No EGTA - 2h CM - siCTR - 3.tif	37			109	Exp3_19517_30minpulse_2hrecovery_VeCad488staining_VeCad647prelabbeled_DAPI_siYapTaz_3.tif	46
																	105	4	1						104	3	1							110	Exp1_130317_No EGTA_siCTR_5.tif	76			110	Exp2_17517_30minpulse_2hrecovery_VeCad488staining_VeCad647prelabbeled_DAPI_siCTR_3.tif	93
																	106	5	3						105	0								111	MAX_No EGTA - 2h CM - siCTR - 3.tif	45			111	Exp3_19517_30minpulse_2hrecovery_VeCad488staining_VeCad647prelabbeled_DAPI_siCTR_1.tif	77
																	107	0							106	0								112	Exp1_130317_No EGTA_siYapTaz_4.tif	62			112	Exp2_17517_30minpulse_2hrecovery_VeCad488staining_VeCad647prelabbeled_DAPI_siCTR_1.tif	81
																	108	2	2						107	0								113	Exp1_130317_No EGTA_siYapTaz_5.tif	61			113	Exp2_17517_30minpulse_2hrecovery_VeCad488staining_VeCad647prelabbeled_DAPI_siYapTaz_5.tif	39
																	109	4	1						108	0								114	Exp1_130317_No EGTA_siCTR_2.tif	85			114	Exp3_19517_30minpulse_2hrecovery_VeCad488staining_VeCad647prelabbeled_DAPI_siCTR_4.tif	88
																	110	5	3						109	0								115	Exp1_130317_No EGTA_siYapTaz_4.tif	54			115	Exp3_19517_30minpulse_2hrecovery_VeCad488staining_VeCad647prelabbeled_DAPI_siYapTaz_2.tif	92
																	111	0	0						110	0								116	MAX_No EGTA - 2h CM - siCTR - 1.tif	24			116	Exp2_17517_30minpulse_2hrecovery_VeCad488staining_VeCad647prelabbeled_DAPI_siCTR_3.tif	45
																	112	5	2						111	3	3							117	MAX_No EGTA - 2h CM - siYapTaz - 5.tif	89			117	Exp3_19517_30minpulse_2hrecovery_VeCad488staining_VeCad647prelabbeled_DAPI_siYapTaz_1.tif	27
																	113	0							112	3	1							118	Exp1_130317_No EGTA_siCTR_3.tif	34			118	Exp3_19517_30minpulse_2hrecovery_VeCad488staining_VeCad647prelabbeled_DAPI_siYapTaz_5.tif	41
																	114	0							113	0								119	MAX_No EGTA - 2h CM - siYapTaz - 4.tif	82			119	Exp3_19517_30minpulse_2hrecovery_VeCad488staining_VeCad647prelabbeled_DAPI_siYapTaz_2.tif	39
																	115	0							114	0								120	Exp1_130317_No EGTA_siCTR_2.tif	68			120	Exp3_19517_30minpulse_2hrecovery_VeCad488staining_VeCad647prelabbeled_DAPI_siCTR_3.tif	45
																	116	0							115	5	2							121	MAX_No EGTA - 2h CM - siYapTaz - 4.tif	14			121	Exp3_19517_30minpulse_2hrecovery_VeCad488staining_VeCad647prelabbeled_DAPI_siYapTaz_5.tif	60
																	117	5	2						116	0								122	MAX_No EGTA - 2h CM - siCTR - 4.tif	41			122	Exp3_19517_30minpulse_2hrecovery_VeCad488staining_VeCad647prelabbeled_DAPI_siCTR_4.tif	57
																	118	0							117	0								123	Exp1_130317_No EGTA_siYapTaz_1.tif	57			123	Exp3_19517_30minpulse_2hrecovery_VeCad488staining_VeCad647prelabbeled_DAPI_siCTR_3.tif	20
																	119	5	2						118	5	2							124	Exp1_130317_No EGTA_siCTR_5.tif	75			124	Exp3_19517_30minpulse_2hrecovery_VeCad488staining_VeCad647prelabbeled_DAPI_siCTR_3.tif	58
																	120	0							119	0								125	MAX_No EGTA - 2h CM - siYapTaz - 4.tif	21			125	Exp2_17517_30minpulse_2hrecovery_VeCad488staining_VeCad647prelabbeled_DAPI_siCTR_5.tif	61
																	121	2	2						120	3	3							126	Exp1_130317_No EGTA_siCTR_1.tif	17			126	Exp2_17517_30minpulse_2hrecovery_VeCad488staining_VeCad647prelabbeled_DAPI_siCTR_5.tif	40
																	122	0							121	0								127	Exp1_130317_No EGTA_siYapTaz_5.tif	99			127	Exp2_17517_30minpulse_2hrecovery_VeCad488staining_VeCad647prelabbeled_DAPI_siYapTaz_3.tif	8
																	123	2	2						122	1	3							128	MAX_No EGTA - 2h CM - siCTR - 4.tif	63			128	Exp3_19517_30minpulse_2hrecovery_VeCad488staining_VeCad647prelabbeled_DAPI_siCTR_5.tif	76
																	124	0							123	0								129	MAX_No EGTA - 2h CM - siYapTaz - 5.tif	24			129	Exp2_17517_30minpulse_2hrecovery_VeCad488staining_VeCad647prelabbeled_DAPI_siCTR_4.tif	34
																	125	0							124	0								130	Exp1_130317_No EGTA_siYapTaz_4.tif	89			130	Exp3_19517_30minpulse_2hrecovery_VeCad488staining_VeCad647prelabbeled_DAPI_siCTR_2.tif	27
																	126	0							125	2	2							131	Exp1_130317_No EGTA_siYapTaz_3.tif	38			131	Exp2_17517_30minpulse_2hrecovery_VeCad488staining_VeCad647prelabbeled_DAPI_siYapTaz_3.tif	2
																	127	0							126	0								132	MAX_No EGTA - 2h CM - siYapTaz - 2.tif	72			132	Exp2_17517_30minpulse_2hrecovery_VeCad488staining_VeCad647prelabbeled_DAPI_siYapTaz_5.tif	32
																	128	2	1						127	2	2							133	Exp1_130317_No EGTA_siYapTaz_3.tif	26			133	Exp2_17517_30minpulse_2hrecovery_VeCad488staining_VeCad647prelabbeled_DAPI_siYapTaz_4.tif	93
																	129	1	2						128	4	1							134	Exp1_130317_No EGTA_siCTR_5.tif	66			134	Exp3_19517_30minpulse_2hrecovery_VeCad488staining_VeCad647prelabbeled_DAPI_siCTR_3.tif	12
																	130	1	3						129	4	1		4	3				135	MAX_No EGTA - 2h CM - siYapTaz - 3.tif	22			135	Exp3_19517_30minpulse_2hrecovery_VeCad488staining_VeCad647prelabbeled_DAPI_siCTR_3.tif	88
																	131	5	3						130	2	1							136	Exp1_130317_No EGTA_siCTR_3.tif	32			136	Exp3_19517_30minpulse_2hrecovery_VeCad488staining_VeCad647prelabbeled_DAPI_siCTR_3.tif	79
																	132	2	1						131	5	3							137	MAX_No EGTA - 2h CM - siYapTaz - 4.tif	9			137	Exp2_17517_30minpulse_2hrecovery_VeCad488staining_VeCad647prelabbeled_DAPI_siCTR_3.tif	48
																	133	1	2						132	1	2							138	MAX_No EGTA - 2h CM - siCTR - 5.tif	56			138	Exp3_19517_30minpulse_2hrecovery_VeCad488staining_VeCad647prelabbeled_DAPI_siCTR_5.tif	89
																	134	0							133	1	2							139	Exp1_130317_No EGTA_siYapTaz_5.tif	43			139	Exp3_19517_30minpulse_2hrecovery_VeCad488staining_VeCad647prelabbeled_DAPI_siYapTaz_1.tif	44
																	135	5	1						134	0								140	MAX_No EGTA - 2h CM - siCTR - 5.tif	24			140	Exp3_19517_30minpulse_2hrecovery_VeCad488staining_VeCad647prelabbeled_DAPI_siCTR_2.tif	39
																	136	0							135	0								141	Exp1_130317_No EGTA_siYapTaz_1.tif	21			141	Exp3_19517_30minpulse_2hrecovery_VeCad488staining_VeCad647prelabbeled_DAPI_siCTR_1.tif	57
																	137	1	2						136	0								142	Exp1_130317_No EGTA_siYapTaz_1.tif	28			142	Exp2_17517_30minpulse_2hrecovery_VeCad488staining_VeCad647prelabbeled_DAPI_siCTR_1.tif	11
																	138	4	1						137	0								143	MAX_No EGTA - 2h CM - siCTR - 1.tif	86			143	Exp3_19517_30minpulse_2hrecovery_VeCad488staining_VeCad647prelabbeled_DAPI_siCTR_2.tif	20
																	139	0							138	0								144	MAX_No EGTA - 2h CM - siCTR - 5.tif	38			144	Exp3_19517_30minpulse_2hrecovery_VeCad488staining_VeCad647prelabbeled_DAPI_siYapTaz_5.tif	75
																	140	0							139	0								145	Exp1_130317_No EGTA_siCTR_2.tif	52			145	Exp2_17517_30minpulse_2hrecovery_VeCad488staining_VeCad647prelabbeled_DAPI_siYapTaz_1.tif	28
																	141	2	2						140	0								146	MAX_No EGTA - 2h CM - siYapTaz - 5.tif	60			146	Exp2_17517_30minpulse_2hrecovery_VeCad488staining_VeCad647prelabbeled_DAPI_siYapTaz_1.tif	93
																	142	5	3						141	0								147	Exp1_130317_No EGTA_siYapTaz_2.tif	82			147	Exp3_19517_30minpulse_2hrecovery_VeCad488staining_VeCad647prelabbeled_DAPI_siCTR_4.tif	5
																	143	1	2		4	1			142	3	1							148	MAX_No EGTA - 2h CM - siYapTaz - 1.tif	34			148	Exp2_17517_30minpulse_2hrecovery_VeCad488staining_VeCad647prelabbeled_DAPI_siCTR_3.tif	23
																	144	4	1						143	1	1							149	MAX_No EGTA - 2h CM - siYapTaz - 2.tif	79			149	Exp3_19517_30minpulse_2hrecovery_VeCad488staining_VeCad647prelabbeled_DAPI_siCTR_2.tif	84
																	145	1	3						144	1	2							150	Exp1_130317_No EGTA_siYapTaz_5.tif	35			150	Exp3_19517_30minpulse_2hrecovery_VeCad488staining_VeCad647prelabbeled_DAPI_siCTR_1.tif	50
																	146	1	2						145	2	3							151	Exp1_130317_No EGTA_siCTR_2.tif	51			151	Exp2_17517_30minpulse_2hrecovery_VeCad488staining_VeCad647prelabbeled_DAPI_siCTR_2.tif	77
																	147	5	3						146	1	2							152	MAX_No EGTA - 2h CM - siCTR - 3.tif	9			152	Exp2_17517_30minpulse_2hrecovery_VeCad488staining_VeCad647prelabbeled_DAPI_siYapTaz_1.tif	50
																	148	0							147	3	3							153	MAX_No EGTA - 2h CM - siCTR - 2.tif	51			153	Exp2_17517_30minpulse_2hrecovery_VeCad488staining_VeCad647prelabbeled_DAPI_siYapTaz_4.tif	72
																	149	3	2		3	1			148	0								154	MAX_No EGTA - 2h CM - siYapTaz - 5.tif	64			154	Exp3_19517_30minpulse_2hrecovery_VeCad488staining_VeCad647prelabbeled_DAPI_siYapTaz_4.tif	21
																	150	2	3						149	0								155	MAX_No EGTA - 2h CM - siCTR - 5.tif	26			155	Exp2_17517_30minpulse_2hrecovery_VeCad488staining_VeCad647prelabbeled_DAPI_siCTR_2.tif	92
																	151	4	3						150	0								156	MAX_No EGTA - 2h CM - siCTR - 5.tif	91			156	Exp3_19517_30minpulse_2hrecovery_VeCad488staining_VeCad647prelabbeled_DAPI_siYapTaz_2.tif	34
																	152	3	1						151	0								157	MAX_No EGTA - 2h CM - siYapTaz - 1.tif	13			157	Exp3_19517_30minpulse_2hrecovery_VeCad488staining_VeCad647prelabbeled_DAPI_siCTR_1.tif	82
																	153	3	2						152	1	1							158	MAX_No EGTA - 2h CM - siYapTaz - 4.tif	86			158	Exp2_17517_30minpulse_2hrecovery_VeCad488staining_VeCad647prelabbeled_DAPI_siYapTaz_2.tif	39
																	154	1	2						153	0								159	MAX_No EGTA - 2h CM - siCTR - 1.tif	8			159	Exp2_17517_30minpulse_2hrecovery_VeCad488staining_VeCad647prelabbeled_DAPI_siYapTaz_5.tif	92
																	155	0							154	0								160	Exp1_130317_No EGTA_siYapTaz_3.tif	50			160	Exp3_19517_30minpulse_2hrecovery_VeCad488staining_VeCad647prelabbeled_DAPI_siYapTaz_4.tif	96
																	156	0							155	0								161	Exp1_130317_No EGTA_siCTR_1.tif	56			161	Exp2_17517_30minpulse_2hrecovery_VeCad488staining_VeCad647prelabbeled_DAPI_siYapTaz_4.tif	2
																	157	4	1		1	3			156	1	2							162	MAX_No EGTA - 2h CM - siCTR - 4.tif	44			162	Exp3_19517_30minpulse_2hrecovery_VeCad488staining_VeCad647prelabbeled_DAPI_siYapTaz_2.tif	59
																	158	5	3						157	0								163	Exp1_130317_No EGTA_siCTR_4.tif	57			163	Exp2_17517_30minpulse_2hrecovery_VeCad488staining_VeCad647prelabbeled_DAPI_siYapTaz_3.tif	55
																	159	2	2						158	0								164	MAX_No EGTA - 2h CM - siCTR - 1.tif	51			164	Exp3_19517_30minpulse_2hrecovery_VeCad488staining_VeCad647prelabbeled_DAPI_siCTR_5.tif	24
																	160	0							159	0								165	Exp1_130317_No EGTA_siCTR_2.tif	23			165	Exp2_17517_30minpulse_2hrecovery_VeCad488staining_VeCad647prelabbeled_DAPI_siCTR_2.tif	28
																	161	0							160	1	2							166	Exp1_130317_No EGTA_siCTR_3.tif	88			166	Exp3_19517_30minpulse_2hrecovery_VeCad488staining_VeCad647prelabbeled_DAPI_siYapTaz_4.tif	98
																	162	0							161	1	3							167	Exp1_130317_No EGTA_siCTR_1.tif	72			167	Exp3_19517_30minpulse_2hrecovery_VeCad488staining_VeCad647prelabbeled_DAPI_siYapTaz_5.tif	86
																	163	3	1		3	3		2	162	1	3							168	Exp1_130317_No EGTA_siYapTaz_3.tif	37			168	Exp2_17517_30minpulse_2hrecovery_VeCad488staining_VeCad647prelabbeled_DAPI_siCTR_4.tif	44
																	164	0							163	0						2	2	169	Exp1_130317_No EGTA_siYapTaz_3.tif	99			169	Exp3_19517_30minpulse_2hrecovery_VeCad488staining_VeCad647prelabbeled_DAPI_siCTR_5.tif	55
																	165	1	3						164	0								170	Exp1_130317_No EGTA_siCTR_3.tif	24			170	Exp2_17517_30minpulse_2hrecovery_VeCad488staining_VeCad647prelabbeled_DAPI_siCTR_5.tif	12
																	166	0							165	5	1							171	Exp1_130317_No EGTA_siCTR_5.tif	95			171	Exp2_17517_30minpulse_2hrecovery_VeCad488staining_VeCad647prelabbeled_DAPI_siYapTaz_4.tif	17
																	167	4	3						166	0								172	Exp1_130317_No EGTA_siCTR_3.tif	93			172	Exp3_19517_30minpulse_2hrecovery_VeCad488staining_VeCad647prelabbeled_DAPI_siCTR_5.tif	96
																	168	0							167	0								173	MAX_No EGTA - 2h CM - siCTR - 2.tif	31			173	Exp2_17517_30minpulse_2hrecovery_VeCad488staining_VeCad647prelabbeled_DAPI_siYapTaz_4.tif	49
																	169	5	3						168	3	1							174	MAX_No EGTA - 2h CM - siYapTaz - 2.tif	2			174	Exp2_17517_30minpulse_2hrecovery_VeCad488staining_VeCad647prelabbeled_DAPI_siYapTaz_2.tif	92
																	170	2	2						169	0								175	MAX_No EGTA - 2h CM - siYapTaz - 1.tif	74			175	Exp2_17517_30minpulse_2hrecovery_VeCad488staining_VeCad647prelabbeled_DAPI_siCTR_4.tif	40
																	171	5	2						170	0								176	MAX_No EGTA - 2h CM - siYapTaz - 5.tif	61			176	Exp2_17517_30minpulse_2hrecovery_VeCad488staining_VeCad647prelabbeled_DAPI_siYapTaz_1.tif	51
																	172	3	1						171	0								177	MAX_No EGTA - 2h CM - siYapTaz - 2.tif	46			177	Exp2_17517_30minpulse_2hrecovery_VeCad488staining_VeCad647prelabbeled_DAPI_siCTR_1.tif	97
																	173	0							172	0								178	Exp1_130317_No EGTA_siCTR_2.tif	46			178	Exp3_19517_30minpulse_2hrecovery_VeCad488staining_VeCad647prelabbeled_DAPI_siYapTaz_5.tif	68
																	174	1	3		5	3			173	1	3							179	MAX_No EGTA - 2h CM - siCTR - 5.tif	27			179	Exp3_19517_30minpulse_2hrecovery_VeCad488staining_VeCad647prelabbeled_DAPI_siCTR_5.tif	10
																	175	0							174	0								180	Exp1_130317_No EGTA_siCTR_4.tif	66			180	Exp2_17517_30minpulse_2hrecovery_VeCad488staining_VeCad647prelabbeled_DAPI_siYapTaz_3.tif	77
																	176	2	2						175	0								181	Exp1_130317_No EGTA_siYapTaz_5.tif	3			181	Exp3_19517_30minpulse_2hrecovery_VeCad488staining_VeCad647prelabbeled_DAPI_siYapTaz_3.tif	74
																	177	2	2						176	1	3							182	Exp1_130317_No EGTA_siYapTaz_4.tif	16			182	Exp3_19517_30minpulse_2hrecovery_VeCad488staining_VeCad647prelabbeled_DAPI_siYapTaz_3.tif	30
																	178	4	3						177	0								183	Exp1_130317_No EGTA_siYapTaz_2.tif	31			183	Exp2_17517_30minpulse_2hrecovery_VeCad488staining_VeCad647prelabbeled_DAPI_siCTR_1.tif	72
																	179	0							178	5	2							184	MAX_No EGTA - 2h CM - siYapTaz - 5.tif	30			184	Exp2_17517_30minpulse_2hrecovery_VeCad488staining_VeCad647prelabbeled_DAPI_siYapTaz_3.tif	9
																	180	0							179	0								185	MAX_No EGTA - 2h CM - siYapTaz - 2.tif	91			185	Exp3_19517_30minpulse_2hrecovery_VeCad488staining_VeCad647prelabbeled_DAPI_siYapTaz_1.tif	66
																	181	2	3						180	0								186	MAX_No EGTA - 2h CM - siCTR - 5.tif	67			186	Exp3_19517_30minpulse_2hrecovery_VeCad488staining_VeCad647prelabbeled_DAPI_siCTR_1.tif	54
																	182	1	3						181	0								187	MAX_No EGTA - 2h CM - siYapTaz - 1.tif	76			187	Exp2_17517_30minpulse_2hrecovery_VeCad488staining_VeCad647prelabbeled_DAPI_siCTR_5.tif	36
																	183	0							182	2	3							188	MAX_No EGTA - 2h CM - siYapTaz - 5.tif	56			188	Exp3_19517_30minpulse_2hrecovery_VeCad488staining_VeCad647prelabbeled_DAPI_siCTR_4.tif	43
																	184	1	2						183	0								189	Exp1_130317_No EGTA_siYapTaz_3.tif	17			189	Exp2_17517_30minpulse_2hrecovery_VeCad488staining_VeCad647prelabbeled_DAPI_siYapTaz_3.tif	87
																	185	1	2						184	0								190	MAX_No EGTA - 2h CM - siYapTaz - 5.tif	39			190	Exp2_17517_30minpulse_2hrecovery_VeCad488staining_VeCad647prelabbeled_DAPI_siYapTaz_2.tif	2
																	186	4	1						185	0								191	Exp1_130317_No EGTA_siCTR_3.tif	5			191	Exp2_17517_30minpulse_2hrecovery_VeCad488staining_VeCad647prelabbeled_DAPI_siCTR_1.tif	66
																	187	2	3						186	0								192	Exp1_130317_No EGTA_siYapTaz_5.tif	37			192	Exp3_19517_30minpulse_2hrecovery_VeCad488staining_VeCad647prelabbeled_DAPI_siYapTaz_3.tif	83
																	188	0							187	0								193	Exp1_130317_No EGTA_siCTR_5.tif	36			193	Exp2_17517_30minpulse_2hrecovery_VeCad488staining_VeCad647prelabbeled_DAPI_siYapTaz_5.tif	67
																	189	1	3						188	0								194	MAX_No EGTA - 2h CM - siYapTaz - 4.tif	65			194	Exp3_19517_30minpulse_2hrecovery_VeCad488staining_VeCad647prelabbeled_DAPI_siYapTaz_3.tif	93
																	190	1	3						189	2	3							195	MAX_No EGTA - 2h CM - siCTR - 1.tif	44			195	Exp2_17517_30minpulse_2hrecovery_VeCad488staining_VeCad647prelabbeled_DAPI_siYapTaz_4.tif	89
																	191	4	3		4	1			190	1	3							196	Exp1_130317_No EGTA_siCTR_1.tif	12			196	Exp2_17517_30minpulse_2hrecovery_VeCad488staining_VeCad647prelabbeled_DAPI_siYapTaz_1.tif	78
																	192	1	2						191	0								197	MAX_No EGTA - 2h CM - siYapTaz - 3.tif	34			197	Exp2_17517_30minpulse_2hrecovery_VeCad488staining_VeCad647prelabbeled_DAPI_siCTR_1.tif	62
																	193	0							192	0								198	Exp1_130317_No EGTA_siCTR_2.tif	94			198	Exp2_17517_30minpulse_2hrecovery_VeCad488staining_VeCad647prelabbeled_DAPI_siCTR_4.tif	32
																	194	4	2						193	0								199	Exp1_130317_No EGTA_siYapTaz_4.tif	75			199	Exp3_19517_30minpulse_2hrecovery_VeCad488staining_VeCad647prelabbeled_DAPI_siYapTaz_1.tif	83
																	195	3	1						194	0								200	MAX_No EGTA - 2h CM - siYapTaz - 1.tif	95			200	Exp3_19517_30minpulse_2hrecovery_VeCad488staining_VeCad647prelabbeled_DAPI_siYapTaz_5.tif	24
																	196	4	1						195	0								201	MAX_No EGTA - 2h CM - siYapTaz - 1.tif	82			201	Exp2_17517_30minpulse_2hrecovery_VeCad488staining_VeCad647prelabbeled_DAPI_siCTR_2.tif	40
																	197	2	2						196	1	3							202	Exp1_130317_No EGTA_siCTR_2.tif	6			202	Exp2_17517_30minpulse_2hrecovery_VeCad488staining_VeCad647prelabbeled_DAPI_siCTR_3.tif	72
																	198	0							197	4	1							203	MAX_No EGTA - 2h CM - siYapTaz - 3.tif	71			203	Exp2_17517_30minpulse_2hrecovery_VeCad488staining_VeCad647prelabbeled_DAPI_siYapTaz_4.tif	3
																	199	5	2						198	1	1							204	Exp1_130317_No EGTA_siYapTaz_2.tif	58			204	Exp2_17517_30minpulse_2hrecovery_VeCad488staining_VeCad647prelabbeled_DAPI_siYapTaz_3.tif	47
																	200	0							199	2	2							205	Exp1_130317_No EGTA_siYapTaz_1.tif	8			205	Exp2_17517_30minpulse_2hrecovery_VeCad488staining_VeCad647prelabbeled_DAPI_siCTR_2.tif	79
																	201	0							200	1	2							206	Exp1_130317_No EGTA_siCTR_1.tif	8			206	Exp3_19517_30minpulse_2hrecovery_VeCad488staining_VeCad647prelabbeled_DAPI_siCTR_1.tif	15
																	202	0							201	0								207	Exp1_130317_No EGTA_siCTR_2.tif	66			207	Exp3_19517_30minpulse_2hrecovery_VeCad488staining_VeCad647prelabbeled_DAPI_siYapTaz_2.tif	96
																	203	5	2						202	0								208	MAX_No EGTA - 2h CM - siCTR - 3.tif	77			208	Exp2_17517_30minpulse_2hrecovery_VeCad488staining_VeCad647prelabbeled_DAPI_siYapTaz_5.tif	21
																	204	2	3						203	0								209	Exp1_130317_No EGTA_siYapTaz_4.tif	41			209	Exp3_19517_30minpulse_2hrecovery_VeCad488staining_VeCad647prelabbeled_DAPI_siYapTaz_2.tif	11
																	205	5	3						204	1	3							210	MAX_No EGTA - 2h CM - siCTR - 2.tif	36			210	Exp3_19517_30minpulse_2hrecovery_VeCad488staining_VeCad647prelabbeled_DAPI_siCTR_3.tif	76
																	206	5	3						205	0								211	Exp1_130317_No EGTA_siYapTaz_4.tif	31			211	Exp3_19517_30minpulse_2hrecovery_VeCad488staining_VeCad647prelabbeled_DAPI_siCTR_3.tif	26
																	207	0	0						206	0								212	Exp1_130317_No EGTA_siYapTaz_4.tif	29			212	Exp2_17517_30minpulse_2hrecovery_VeCad488staining_VeCad647prelabbeled_DAPI_siYapTaz_5.tif	98
																	208	0							207	0								213	Exp1_130317_No EGTA_siYapTaz_3.tif	93			213	Exp2_17517_30minpulse_2hrecovery_VeCad488staining_VeCad647prelabbeled_DAPI_siYapTaz_1.tif	85
																	209	5	3						208	1	3							214	Exp1_130317_No EGTA_siYapTaz_1.tif	15			214	Exp3_19517_30minpulse_2hrecovery_VeCad488staining_VeCad647prelabbeled_DAPI_siCTR_5.tif	56
																	210	1	1						209	3	2							215	Exp1_130317_No EGTA_siYapTaz_5.tif	93			215	Exp2_17517_30minpulse_2hrecovery_VeCad488staining_VeCad647prelabbeled_DAPI_siYapTaz_2.tif	60
																	211	0							210	0								216	Exp1_130317_No EGTA_siYapTaz_2.tif	36			216	Exp2_17517_30minpulse_2hrecovery_VeCad488staining_VeCad647prelabbeled_DAPI_siCTR_2.tif	88
																	212	5	3						211	0								217	Exp1_130317_No EGTA_siYapTaz_5.tif	36			217	Exp2_17517_30minpulse_2hrecovery_VeCad488staining_VeCad647prelabbeled_DAPI_siYapTaz_2.tif	11
																	213	5	3						212	1	2							218	Exp1_130317_No EGTA_siCTR_1.tif	92			218	Exp2_17517_30minpulse_2hrecovery_VeCad488staining_VeCad647prelabbeled_DAPI_siYapTaz_1.tif	71
																	214	1	2						213	0								219	Exp1_130317_No EGTA_siYapTaz_3.tif	58			219	Exp3_19517_30minpulse_2hrecovery_VeCad488staining_VeCad647prelabbeled_DAPI_siCTR_4.tif	8
																	215	5	3						214	0								220	MAX_No EGTA - 2h CM - siCTR - 2.tif	67			220	Exp2_17517_30minpulse_2hrecovery_VeCad488staining_VeCad647prelabbeled_DAPI_siCTR_4.tif	46
																	216	5	3						215	0								221	MAX_No EGTA - 2h CM - siYapTaz - 3.tif	91			221	Exp3_19517_30minpulse_2hrecovery_VeCad488staining_VeCad647prelabbeled_DAPI_siCTR_4.tif	2
																	217	0							216	3	2							222	MAX_No EGTA - 2h CM - siYapTaz - 5.tif	5			222	Exp3_19517_30minpulse_2hrecovery_VeCad488staining_VeCad647prelabbeled_DAPI_siYapTaz_3.tif	86
																	218	0							217	1	3							223	Exp1_130317_No EGTA_siCTR_3.tif	71			223	Exp3_19517_30minpulse_2hrecovery_VeCad488staining_VeCad647prelabbeled_DAPI_siCTR_3.tif	98
																	219	1	2						218	0								224	MAX_No EGTA - 2h CM - siYapTaz - 3.tif	97			224	Exp3_19517_30minpulse_2hrecovery_VeCad488staining_VeCad647prelabbeled_DAPI_siCTR_1.tif	20
																	220	3	1						219	0								225	MAX_No EGTA - 2h CM - siYapTaz - 1.tif	51			225	Exp3_19517_30minpulse_2hrecovery_VeCad488staining_VeCad647prelabbeled_DAPI_siCTR_1.tif	17
																	221	1	1						220	3	1							226	MAX_No EGTA - 2h CM - siYapTaz - 2.tif	61			226	Exp2_17517_30minpulse_2hrecovery_VeCad488staining_VeCad647prelabbeled_DAPI_siYapTaz_2.tif	14
																	222	0							221	0								227	Exp1_130317_No EGTA_siCTR_1.tif	80			227	Exp3_19517_30minpulse_2hrecovery_VeCad488staining_VeCad647prelabbeled_DAPI_siCTR_4.tif	89
																	223	0							222	5	1							228	MAX_No EGTA - 2h CM - siYapTaz - 1.tif	57			228	Exp3_19517_30minpulse_2hrecovery_VeCad488staining_VeCad647prelabbeled_DAPI_siYapTaz_1.tif	23
																	224	1	3						223	0								229	MAX_No EGTA - 2h CM - siCTR - 5.tif	41			229	Exp3_19517_30minpulse_2hrecovery_VeCad488staining_VeCad647prelabbeled_DAPI_siCTR_1.tif	3
																	225	1	2						224	0								230	Exp1_130317_No EGTA_siCTR_1.tif	97			230	Exp2_17517_30minpulse_2hrecovery_VeCad488staining_VeCad647prelabbeled_DAPI_siYapTaz_5.tif	40
																	226	5	3						225	0								231	MAX_No EGTA - 2h CM - siCTR - 5.tif	94			231	Exp2_17517_30minpulse_2hrecovery_VeCad488staining_VeCad647prelabbeled_DAPI_siCTR_4.tif	6
																	227	2	3						226	1	3							232	MAX_No EGTA - 2h CM - siCTR - 2.tif	44			232	Exp2_17517_30minpulse_2hrecovery_VeCad488staining_VeCad647prelabbeled_DAPI_siCTR_1.tif	23
																	228	5	1						227	0								233	MAX_No EGTA - 2h CM - siCTR - 3.tif	8			233	Exp3_19517_30minpulse_2hrecovery_VeCad488staining_VeCad647prelabbeled_DAPI_siCTR_4.tif	66
																	229	3	1						228	2	2							234	Exp1_130317_No EGTA_siCTR_2.tif	9			234	Exp2_17517_30minpulse_2hrecovery_VeCad488staining_VeCad647prelabbeled_DAPI_siYapTaz_4.tif	73
																	230	5	2						229	0								235	Exp1_130317_No EGTA_siCTR_1.tif	11			235	Exp2_17517_30minpulse_2hrecovery_VeCad488staining_VeCad647prelabbeled_DAPI_siYapTaz_4.tif	90
																	231	0							230	0								236	Exp1_130317_No EGTA_siCTR_4.tif	87			236	Exp3_19517_30minpulse_2hrecovery_VeCad488staining_VeCad647prelabbeled_DAPI_siYapTaz_4.tif	68
																	232	1	3						231	0								237	Exp1_130317_No EGTA_siYapTaz_1.tif	96			237	Exp2_17517_30minpulse_2hrecovery_VeCad488staining_VeCad647prelabbeled_DAPI_siYapTaz_4.tif	13
																	233	3	1						232	0								238	Exp1_130317_No EGTA_siCTR_2.tif	32			238	Exp2_17517_30minpulse_2hrecovery_VeCad488staining_VeCad647prelabbeled_DAPI_siCTR_1.tif	45
																	234	1	2		1	3			233	0								239	Exp1_130317_No EGTA_siCTR_3.tif	99			239	Exp3_19517_30minpulse_2hrecovery_VeCad488staining_VeCad647prelabbeled_DAPI_siYapTaz_4.tif	42
																	235	2	3						234	5	3							240	MAX_No EGTA - 2h CM - siCTR - 1.tif	32			240	Exp2_17517_30minpulse_2hrecovery_VeCad488staining_VeCad647prelabbeled_DAPI_siYapTaz_2.tif	37
																	236	5	3						235	0								241	Exp1_130317_No EGTA_siCTR_4.tif	90			241	Exp2_17517_30minpulse_2hrecovery_VeCad488staining_VeCad647prelabbeled_DAPI_siCTR_4.tif	20
																	237	5	3						236	0								242	MAX_No EGTA - 2h CM - siCTR - 4.tif	23			242	Exp3_19517_30minpulse_2hrecovery_VeCad488staining_VeCad647prelabbeled_DAPI_siCTR_2.tif	58
																	238	5	3						237	5	2							243	Exp1_130317_No EGTA_siCTR_1.tif	65			243	Exp2_17517_30minpulse_2hrecovery_VeCad488staining_VeCad647prelabbeled_DAPI_siCTR_2.tif	15
																	239	0							238	0								244	Exp1_130317_No EGTA_siCTR_2.tif	86			244	Exp3_19517_30minpulse_2hrecovery_VeCad488staining_VeCad647prelabbeled_DAPI_siYapTaz_3.tif	29
																	240	4	1						239	0								245	Exp1_130317_No EGTA_siYapTaz_5.tif	33			245	Exp2_17517_30minpulse_2hrecovery_VeCad488staining_VeCad647prelabbeled_DAPI_siCTR_1.tif	15
																	241	3	2						240	0								246	Exp1_130317_No EGTA_siYapTaz_4.tif	67			246	Exp2_17517_30minpulse_2hrecovery_VeCad488staining_VeCad647prelabbeled_DAPI_siYapTaz_3.tif	38
																	242	0							241	3	2							247	Exp1_130317_No EGTA_siCTR_2.tif	92			247	Exp2_17517_30minpulse_2hrecovery_VeCad488staining_VeCad647prelabbeled_DAPI_siCTR_1.tif	60
																	243	5	3						242	0								248	Exp1_130317_No EGTA_siCTR_3.tif	44			248	Exp2_17517_30minpulse_2hrecovery_VeCad488staining_VeCad647prelabbeled_DAPI_siYapTaz_2.tif	59
																	244	5	3						243	0								249	MAX_No EGTA - 2h CM - siYapTaz - 2.tif	80			249	Exp2_17517_30minpulse_2hrecovery_VeCad488staining_VeCad647prelabbeled_DAPI_siCTR_3.tif	52
																	245	1	3						244	1	2							250	Exp1_130317_No EGTA_siYapTaz_3.tif	0			250	Exp3_19517_30minpulse_2hrecovery_VeCad488staining_VeCad647prelabbeled_DAPI_siYapTaz_3.tif	5
																	246	1	3						245	4	1		4	2				251	Exp1_130317_No EGTA_siCTR_1.tif	42			251	Exp2_17517_30minpulse_2hrecovery_VeCad488staining_VeCad647prelabbeled_DAPI_siCTR_5.tif	54
																	247	0							246	1	3							252	MAX_No EGTA - 2h CM - siYapTaz - 1.tif	90			252	Exp2_17517_30minpulse_2hrecovery_VeCad488staining_VeCad647prelabbeled_DAPI_siCTR_5.tif	66
																	248	0							247	0								253	MAX_No EGTA - 2h CM - siCTR - 5.tif	17			253	Exp3_19517_30minpulse_2hrecovery_VeCad488staining_VeCad647prelabbeled_DAPI_siCTR_5.tif	59
																	249	0							248	0								254	Exp1_130317_No EGTA_siCTR_4.tif	68			254	Exp3_19517_30minpulse_2hrecovery_VeCad488staining_VeCad647prelabbeled_DAPI_siYapTaz_1.tif	14
																	250	1	3						249	0								255	MAX_No EGTA - 2h CM - siYapTaz - 5.tif	79			255	Exp3_19517_30minpulse_2hrecovery_VeCad488staining_VeCad647prelabbeled_DAPI_siCTR_3.tif	49
																	251	4	3						250	5	3							256	MAX_No EGTA - 2h CM - siYapTaz - 4.tif	58			256	Exp3_19517_30minpulse_2hrecovery_VeCad488staining_VeCad647prelabbeled_DAPI_siYapTaz_1.tif	91
																	252	2	2						251	4	2							257	Exp1_130317_No EGTA_siYapTaz_2.tif	18			257	Exp3_19517_30minpulse_2hrecovery_VeCad488staining_VeCad647prelabbeled_DAPI_siYapTaz_4.tif	38
																	253	0							252	3	1							258	Exp1_130317_No EGTA_siCTR_3.tif	62			258	Exp2_17517_30minpulse_2hrecovery_VeCad488staining_VeCad647prelabbeled_DAPI_siCTR_5.tif	52
																	254	0							253	0								259	Exp1_130317_No EGTA_siCTR_1.tif	67			259	Exp2_17517_30minpulse_2hrecovery_VeCad488staining_VeCad647prelabbeled_DAPI_siCTR_5.tif	9
																	255	0							254	1	2							260	MAX_No EGTA - 2h CM - siYapTaz - 5.tif	20			260	Exp2_17517_30minpulse_2hrecovery_VeCad488staining_VeCad647prelabbeled_DAPI_siYapTaz_4.tif	57
																	256	0							255	0								261	Exp1_130317_No EGTA_siYapTaz_1.tif	19			261	Exp3_19517_30minpulse_2hrecovery_VeCad488staining_VeCad647prelabbeled_DAPI_siYapTaz_4.tif	82
																	257	2	2						256	1	1							262	Exp1_130317_No EGTA_siCTR_3.tif	55			262	Exp2_17517_30minpulse_2hrecovery_VeCad488staining_VeCad647prelabbeled_DAPI_siYapTaz_1.tif	4
																	258	0							257	0								263	Exp1_130317_No EGTA_siCTR_1.tif	75			263	Exp2_17517_30minpulse_2hrecovery_VeCad488staining_VeCad647prelabbeled_DAPI_siCTR_3.tif	81
																	259	1	3						258	0								264	Exp1_130317_No EGTA_siYapTaz_4.tif	35			264	Exp3_19517_30minpulse_2hrecovery_VeCad488staining_VeCad647prelabbeled_DAPI_siCTR_5.tif	86
																	260	2	2						259	0								265	MAX_No EGTA - 2h CM - siCTR - 5.tif	39			265	Exp2_17517_30minpulse_2hrecovery_VeCad488staining_VeCad647prelabbeled_DAPI_siYapTaz_2.tif	83
																	261	1	2						260	0								266	Exp1_130317_No EGTA_siCTR_4.tif	0			266	Exp3_19517_30minpulse_2hrecovery_VeCad488staining_VeCad647prelabbeled_DAPI_siCTR_1.tif	25
																	262	1	3						261	1	3							267	MAX_No EGTA - 2h CM - siCTR - 2.tif	3			267	Exp2_17517_30minpulse_2hrecovery_VeCad488staining_VeCad647prelabbeled_DAPI_siYapTaz_2.tif	15
																	263	5	2		4	1			262	1	3							268	Exp1_130317_No EGTA_siYapTaz_4.tif	19			268	Exp3_19517_30minpulse_2hrecovery_VeCad488staining_VeCad647prelabbeled_DAPI_siCTR_5.tif	31
																	264	0							263	0								269	MAX_No EGTA - 2h CM - siYapTaz - 3.tif	25			269	Exp3_19517_30minpulse_2hrecovery_VeCad488staining_VeCad647prelabbeled_DAPI_siYapTaz_1.tif	88
																	265	5	3						264	0								270	Exp1_130317_No EGTA_siCTR_2.tif	3			270	Exp2_17517_30minpulse_2hrecovery_VeCad488staining_VeCad647prelabbeled_DAPI_siYapTaz_5.tif	66
																	266	4	1						265	0								271	MAX_No EGTA - 2h CM - siCTR - 4.tif	13			271	Exp3_19517_30minpulse_2hrecovery_VeCad488staining_VeCad647prelabbeled_DAPI_siYapTaz_1.tif	38
																	267	0							266	0								272	Exp1_130317_No EGTA_siCTR_5.tif	98			272	Exp3_19517_30minpulse_2hrecovery_VeCad488staining_VeCad647prelabbeled_DAPI_siCTR_5.tif	33
																	268	0							267	1	3							273	MAX_No EGTA - 2h CM - siCTR - 5.tif	33			273	Exp3_19517_30minpulse_2hrecovery_VeCad488staining_VeCad647prelabbeled_DAPI_siCTR_4.tif	55
																	269	1	3						268	0								274	MAX_No EGTA - 2h CM - siCTR - 2.tif	2			274	Exp3_19517_30minpulse_2hrecovery_VeCad488staining_VeCad647prelabbeled_DAPI_siCTR_4.tif	23
																	270	0							269	0								275	Exp1_130317_No EGTA_siYapTaz_3.tif	1			275	Exp3_19517_30minpulse_2hrecovery_VeCad488staining_VeCad647prelabbeled_DAPI_siYapTaz_2.tif	73
																	271	4	1						270	5	3							276	Exp1_130317_No EGTA_siYapTaz_1.tif	81			276	Exp2_17517_30minpulse_2hrecovery_VeCad488staining_VeCad647prelabbeled_DAPI_siCTR_1.tif	27
																	272	1	2						271	0								277	Exp1_130317_No EGTA_siYapTaz_3.tif	3			277	Exp2_17517_30minpulse_2hrecovery_VeCad488staining_VeCad647prelabbeled_DAPI_siCTR_5.tif	7
																	273	4	1		4	3			272	0								278	MAX_No EGTA - 2h CM - siCTR - 5.tif	35			278	Exp2_17517_30minpulse_2hrecovery_VeCad488staining_VeCad647prelabbeled_DAPI_siYapTaz_5.tif	22
																	274	4	1						273	0								279	Exp1_130317_No EGTA_siCTR_1.tif	39			279	Exp3_19517_30minpulse_2hrecovery_VeCad488staining_VeCad647prelabbeled_DAPI_siYapTaz_4.tif	35
																	275	0							274	4	3							280	MAX_No EGTA - 2h CM - siCTR - 2.tif	91			280	Exp3_19517_30minpulse_2hrecovery_VeCad488staining_VeCad647prelabbeled_DAPI_siCTR_2.tif	30
																	276	0							275	0								281	MAX_No EGTA - 2h CM - siCTR - 1.tif	38			281	Exp2_17517_30minpulse_2hrecovery_VeCad488staining_VeCad647prelabbeled_DAPI_siYapTaz_4.tif	63
																	277	1	3						276	0								282	Exp1_130317_No EGTA_siCTR_1.tif	10			282	Exp2_17517_30minpulse_2hrecovery_VeCad488staining_VeCad647prelabbeled_DAPI_siCTR_5.tif	18
																	278	0							277	4	1							283	Exp1_130317_No EGTA_siCTR_1.tif	29			283	Exp3_19517_30minpulse_2hrecovery_VeCad488staining_VeCad647prelabbeled_DAPI_siYapTaz_4.tif	27
																	279	1	2						278	0								284	MAX_No EGTA - 2h CM - siCTR - 4.tif	66			284	Exp3_19517_30minpulse_2hrecovery_VeCad488staining_VeCad647prelabbeled_DAPI_siCTR_2.tif	53
																	280	0							279	2	2							285	MAX_No EGTA - 2h CM - siYapTaz - 2.tif	1			285	Exp3_19517_30minpulse_2hrecovery_VeCad488staining_VeCad647prelabbeled_DAPI_siYapTaz_2.tif	67
																	281	4	1						280	2	2							286	MAX_No EGTA - 2h CM - siCTR - 5.tif	21			286	Exp3_19517_30minpulse_2hrecovery_VeCad488staining_VeCad647prelabbeled_DAPI_siCTR_4.tif	46
																	282	3	1						281	0								287	Exp1_130317_No EGTA_siCTR_4.tif	30			287	Exp2_17517_30minpulse_2hrecovery_VeCad488staining_VeCad647prelabbeled_DAPI_siYapTaz_1.tif	88
																	283	5	3						282	0								288	Exp1_130317_No EGTA_siCTR_1.tif	15			288	Exp2_17517_30minpulse_2hrecovery_VeCad488staining_VeCad647prelabbeled_DAPI_siYapTaz_1.tif	80
																	284	0							283	0								289	Exp1_130317_No EGTA_siYapTaz_5.tif	19			289	Exp3_19517_30minpulse_2hrecovery_VeCad488staining_VeCad647prelabbeled_DAPI_siCTR_2.tif	43
																	285	1	3						284	3	1							290	Exp1_130317_No EGTA_siYapTaz_3.tif	66			290	Exp2_17517_30minpulse_2hrecovery_VeCad488staining_VeCad647prelabbeled_DAPI_siYapTaz_1.tif	76
																	286	4	1						285	0								291	Exp1_130317_No EGTA_siYapTaz_3.tif	12			291	Exp3_19517_30minpulse_2hrecovery_VeCad488staining_VeCad647prelabbeled_DAPI_siYapTaz_3.tif	41
																	287	5	3						286	0								292	Exp1_130317_No EGTA_siYapTaz_2.tif	76			292	Exp3_19517_30minpulse_2hrecovery_VeCad488staining_VeCad647prelabbeled_DAPI_siYapTaz_2.tif	30
																	288	0							287	1	3							293	MAX_No EGTA - 2h CM - siYapTaz - 2.tif	25			293	Exp3_19517_30minpulse_2hrecovery_VeCad488staining_VeCad647prelabbeled_DAPI_siCTR_5.tif	93
																	289	0							288	1	2							294	Exp1_130317_No EGTA_siCTR_1.tif	23			294	Exp3_19517_30minpulse_2hrecovery_VeCad488staining_VeCad647prelabbeled_DAPI_siYapTaz_1.tif	62
																	290	0							289	0								295	MAX_No EGTA - 2h CM - siYapTaz - 3.tif	82			295	Exp3_19517_30minpulse_2hrecovery_VeCad488staining_VeCad647prelabbeled_DAPI_siCTR_3.tif	87
																	291	1	2						290	2	2							296	Exp1_130317_No EGTA_siYapTaz_2.tif	25			296	Exp3_19517_30minpulse_2hrecovery_VeCad488staining_VeCad647prelabbeled_DAPI_siCTR_1.tif	68
																	292	5	3						291	1	2							297	Exp1_130317_No EGTA_siCTR_3.tif	47			297	Exp2_17517_30minpulse_2hrecovery_VeCad488staining_VeCad647prelabbeled_DAPI_siCTR_5.tif	14
																	293	0							292	0								298	MAX_No EGTA - 2h CM - siCTR - 4.tif	34			298	Exp2_17517_30minpulse_2hrecovery_VeCad488staining_VeCad647prelabbeled_DAPI_siCTR_4.tif	51
																	294	2	2						293	0								299	MAX_No EGTA - 2h CM - siYapTaz - 3.tif	12			299	Exp2_17517_30minpulse_2hrecovery_VeCad488staining_VeCad647prelabbeled_DAPI_siCTR_2.tif	67
																	295	0							294	0								300	MAX_No EGTA - 2h CM - siYapTaz - 1.tif	97			300	Exp3_19517_30minpulse_2hrecovery_VeCad488staining_VeCad647prelabbeled_DAPI_siYapTaz_3.tif	13
																	296	0							295	0								301	Exp1_130317_No EGTA_siCTR_2.tif	22			301	Exp3_19517_30minpulse_2hrecovery_VeCad488staining_VeCad647prelabbeled_DAPI_siYapTaz_1.tif	95
																	297	1	3						296	0								302	MAX_No EGTA - 2h CM - siCTR - 2.tif	34			302	Exp3_19517_30minpulse_2hrecovery_VeCad488staining_VeCad647prelabbeled_DAPI_siCTR_4.tif	58
																	298	0							297	5	3							303	Exp1_130317_No EGTA_siYapTaz_1.tif	66			303	Exp2_17517_30minpulse_2hrecovery_VeCad488staining_VeCad647prelabbeled_DAPI_siCTR_1.tif	86
																	299	2	2						298	3	2							304	Exp1_130317_No EGTA_siCTR_1.tif	34			304	Exp2_17517_30minpulse_2hrecovery_VeCad488staining_VeCad647prelabbeled_DAPI_siYapTaz_4.tif	67
																	300	0							299	0								305	MAX_No EGTA - 2h CM - siYapTaz - 4.tif	4			305	Exp3_19517_30minpulse_2hrecovery_VeCad488staining_VeCad647prelabbeled_DAPI_siYapTaz_1.tif	33
																	301	1	3						300	0								306	MAX_No EGTA - 2h CM - siYapTaz - 4.tif	69			306	Exp2_17517_30minpulse_2hrecovery_VeCad488staining_VeCad647prelabbeled_DAPI_siCTR_5.tif	84
																	302	0							301	0								307	MAX_No EGTA - 2h CM - siCTR - 1.tif	92			307	Exp3_19517_30minpulse_2hrecovery_VeCad488staining_VeCad647prelabbeled_DAPI_siCTR_1.tif	63
																	303	1	2						302	0								308	MAX_No EGTA - 2h CM - siCTR - 1.tif	28			308	Exp2_17517_30minpulse_2hrecovery_VeCad488staining_VeCad647prelabbeled_DAPI_siYapTaz_2.tif	79
																	304	0							303	0								309	Exp1_130317_No EGTA_siYapTaz_4.tif	50			309	Exp3_19517_30minpulse_2hrecovery_VeCad488staining_VeCad647prelabbeled_DAPI_siCTR_3.tif	13
																	305	1	1						304	0								310	Exp1_130317_No EGTA_siYapTaz_3.tif	2			310	Exp2_17517_30minpulse_2hrecovery_VeCad488staining_VeCad647prelabbeled_DAPI_siCTR_1.tif	38
																	306	1	2						305	0								311	MAX_No EGTA - 2h CM - siCTR - 1.tif	23			311	Exp2_17517_30minpulse_2hrecovery_VeCad488staining_VeCad647prelabbeled_DAPI_siCTR_4.tif	50
																	307	0							306	0								312	Exp1_130317_No EGTA_siYapTaz_4.tif	0			312	Exp3_19517_30minpulse_2hrecovery_VeCad488staining_VeCad647prelabbeled_DAPI_siCTR_4.tif	69
																	308	0							307	2	2							313	MAX_No EGTA - 2h CM - siYapTaz - 3.tif	52			313	Exp2_17517_30minpulse_2hrecovery_VeCad488staining_VeCad647prelabbeled_DAPI_siCTR_2.tif	84
																	309	5	2						308	1	1							314	Exp1_130317_No EGTA_siCTR_3.tif	96			314	Exp2_17517_30minpulse_2hrecovery_VeCad488staining_VeCad647prelabbeled_DAPI_siYapTaz_2.tif	21
																	310	5	2						309	0								315	MAX_No EGTA - 2h CM - siCTR - 3.tif	75			315	Exp3_19517_30minpulse_2hrecovery_VeCad488staining_VeCad647prelabbeled_DAPI_siCTR_3.tif	9
																	311	1	2						310	0								316	MAX_No EGTA - 2h CM - siYapTaz - 2.tif	15			316	Exp3_19517_30minpulse_2hrecovery_VeCad488staining_VeCad647prelabbeled_DAPI_siYapTaz_4.tif	7
																	312	2	2						311	0								317	MAX_No EGTA - 2h CM - siYapTaz - 3.tif	40			317	Exp3_19517_30minpulse_2hrecovery_VeCad488staining_VeCad647prelabbeled_DAPI_siCTR_2.tif	66
																	313	1	2						312	2	3							318	Exp1_130317_No EGTA_siYapTaz_1.tif	56			318	Exp2_17517_30minpulse_2hrecovery_VeCad488staining_VeCad647prelabbeled_DAPI_siCTR_5.tif	0
																	314	1	3						313	2	1							319	Exp1_130317_No EGTA_siCTR_1.tif	3			319	Exp2_17517_30minpulse_2hrecovery_VeCad488staining_VeCad647prelabbeled_DAPI_siYapTaz_1.tif	49
																	315	0							314	0								320	Exp1_130317_No EGTA_siYapTaz_5.tif	91			320	Exp2_17517_30minpulse_2hrecovery_VeCad488staining_VeCad647prelabbeled_DAPI_siCTR_2.tif	32
																	316	0							315	3	3							321	Exp1_130317_No EGTA_siYapTaz_3.tif	87			321	Exp2_17517_30minpulse_2hrecovery_VeCad488staining_VeCad647prelabbeled_DAPI_siCTR_4.tif	77
																	317	1	2						316	1	2							322	Exp1_130317_No EGTA_siYapTaz_5.tif	31			322	Exp2_17517_30minpulse_2hrecovery_VeCad488staining_VeCad647prelabbeled_DAPI_siYapTaz_5.tif	77
																	318	1	2						317	0								323	MAX_No EGTA - 2h CM - siCTR - 2.tif	30			323	Exp2_17517_30minpulse_2hrecovery_VeCad488staining_VeCad647prelabbeled_DAPI_siCTR_3.tif	42
																	319	0							318	2	2							324	MAX_No EGTA - 2h CM - siYapTaz - 2.tif	12			324	Exp3_19517_30minpulse_2hrecovery_VeCad488staining_VeCad647prelabbeled_DAPI_siYapTaz_3.tif	62
																	320	5	3						319	1	3							325	Exp1_130317_No EGTA_siCTR_4.tif	74			325	Exp2_17517_30minpulse_2hrecovery_VeCad488staining_VeCad647prelabbeled_DAPI_siCTR_1.tif	47
																	321	5	2						320	2	1							326	MAX_No EGTA - 2h CM - siYapTaz - 3.tif	10			326	Exp2_17517_30minpulse_2hrecovery_VeCad488staining_VeCad647prelabbeled_DAPI_siCTR_2.tif	93
																	322	2	2						321	4	3							327	MAX_No EGTA - 2h CM - siCTR - 5.tif	51			327	Exp2_17517_30minpulse_2hrecovery_VeCad488staining_VeCad647prelabbeled_DAPI_siYapTaz_3.tif	34
																	323	0							322	1	3							328	Exp1_130317_No EGTA_siCTR_2.tif	11			328	Exp3_19517_30minpulse_2hrecovery_VeCad488staining_VeCad647prelabbeled_DAPI_siCTR_1.tif	66
																	324	1	2						323	4	3							329	Exp1_130317_No EGTA_siYapTaz_2.tif	6			329	Exp2_17517_30minpulse_2hrecovery_VeCad488staining_VeCad647prelabbeled_DAPI_siCTR_4.tif	36
																	325	0							324	0								330	MAX_No EGTA - 2h CM - siCTR - 4.tif	58			330	Exp2_17517_30minpulse_2hrecovery_VeCad488staining_VeCad647prelabbeled_DAPI_siYapTaz_5.tif	81
																	326	2	2						325	3	1							331	Exp1_130317_No EGTA_siCTR_5.tif	59			331	Exp2_17517_30minpulse_2hrecovery_VeCad488staining_VeCad647prelabbeled_DAPI_siYapTaz_4.tif	77
																	327	4	1						326	1	1							332	MAX_No EGTA - 2h CM - siYapTaz - 5.tif	22			332	Exp2_17517_30minpulse_2hrecovery_VeCad488staining_VeCad647prelabbeled_DAPI_siYapTaz_4.tif	25
																	328	5	3						327	0								333	MAX_No EGTA - 2h CM - siCTR - 3.tif	67			333	Exp3_19517_30minpulse_2hrecovery_VeCad488staining_VeCad647prelabbeled_DAPI_siYapTaz_2.tif	36
																	329	0							328	0								334	Exp1_130317_No EGTA_siYapTaz_4.tif	71			334	Exp2_17517_30minpulse_2hrecovery_VeCad488staining_VeCad647prelabbeled_DAPI_siYapTaz_1.tif	65
																	330	3	2						329	4	2							335	Exp1_130317_No EGTA_siYapTaz_4.tif	61			335	Exp3_19517_30minpulse_2hrecovery_VeCad488staining_VeCad647prelabbeled_DAPI_siCTR_1.tif	31
																	331	0							330	0								336	Exp1_130317_No EGTA_siCTR_4.tif	64			336	Exp2_17517_30minpulse_2hrecovery_VeCad488staining_VeCad647prelabbeled_DAPI_siCTR_2.tif	94
																	332	5	3						331	0								337	MAX_No EGTA - 2h CM - siYapTaz - 5.tif	21			337	Exp2_17517_30minpulse_2hrecovery_VeCad488staining_VeCad647prelabbeled_DAPI_siYapTaz_1.tif	15
																	333	5	1						332	0								338	Exp1_130317_No EGTA_siCTR_1.tif	71			338	Exp2_17517_30minpulse_2hrecovery_VeCad488staining_VeCad647prelabbeled_DAPI_siYapTaz_3.tif	46
																	334	1	3						333	0								339	Exp1_130317_No EGTA_siCTR_1.tif	1			339	Exp2_17517_30minpulse_2hrecovery_VeCad488staining_VeCad647prelabbeled_DAPI_siCTR_5.tif	63
																	335	1	2						334	1	2							340	MAX_No EGTA - 2h CM - siYapTaz - 1.tif	38			340	Exp3_19517_30minpulse_2hrecovery_VeCad488staining_VeCad647prelabbeled_DAPI_siYapTaz_5.tif	6
																	336	0							335	0								341	Exp1_130317_No EGTA_siYapTaz_2.tif	23			341	Exp3_19517_30minpulse_2hrecovery_VeCad488staining_VeCad647prelabbeled_DAPI_siYapTaz_3.tif	61
																	337	5	3						336	0								342	Exp1_130317_No EGTA_siYapTaz_2.tif	15			342	Exp3_19517_30minpulse_2hrecovery_VeCad488staining_VeCad647prelabbeled_DAPI_siYapTaz_1.tif	25
																	338	1	2						337	0								343	MAX_No EGTA - 2h CM - siCTR - 4.tif	48			343	Exp2_17517_30minpulse_2hrecovery_VeCad488staining_VeCad647prelabbeled_DAPI_siCTR_5.tif	23
																	339	0							338	1	3							344	MAX_No EGTA - 2h CM - siCTR - 4.tif	36			344	Exp3_19517_30minpulse_2hrecovery_VeCad488staining_VeCad647prelabbeled_DAPI_siYapTaz_2.tif	27
																	340	4	1		1	2			339	1	3							345	Exp1_130317_No EGTA_siCTR_2.tif	59			345	Exp3_19517_30minpulse_2hrecovery_VeCad488staining_VeCad647prelabbeled_DAPI_siCTR_5.tif	1
																	341	0							340	0								346	Exp1_130317_No EGTA_siYapTaz_4.tif	64			346	Exp3_19517_30minpulse_2hrecovery_VeCad488staining_VeCad647prelabbeled_DAPI_siCTR_3.tif	5
																	342	5	3						341	0								347	Exp1_130317_No EGTA_siYapTaz_4.tif	97			347	Exp2_17517_30minpulse_2hrecovery_VeCad488staining_VeCad647prelabbeled_DAPI_siCTR_2.tif	17
																	343	4	2						342	2	2							348	MAX_No EGTA - 2h CM - siYapTaz - 2.tif	34			348	Exp3_19517_30minpulse_2hrecovery_VeCad488staining_VeCad647prelabbeled_DAPI_siCTR_4.tif	49
																	344	5	3						343	0								349	MAX_No EGTA - 2h CM - siYapTaz - 2.tif	37			349	Exp2_17517_30minpulse_2hrecovery_VeCad488staining_VeCad647prelabbeled_DAPI_siCTR_5.tif	25
																	345	0							344	0								350	MAX_No EGTA - 2h CM - siCTR - 1.tif	45			350	Exp3_19517_30minpulse_2hrecovery_VeCad488staining_VeCad647prelabbeled_DAPI_siYapTaz_1.tif	5
																	346	5	3						345	0								351	MAX_No EGTA - 2h CM - siCTR - 2.tif	98			351	Exp3_19517_30minpulse_2hrecovery_VeCad488staining_VeCad647prelabbeled_DAPI_siYapTaz_1.tif	53
																	347	0							346	0								352	MAX_No EGTA - 2h CM - siYapTaz - 5.tif	43			352	Exp3_19517_30minpulse_2hrecovery_VeCad488staining_VeCad647prelabbeled_DAPI_siYapTaz_5.tif	55
																	348	1	2						347	5	1							353	Exp1_130317_No EGTA_siYapTaz_3.tif	88			353	Exp3_19517_30minpulse_2hrecovery_VeCad488staining_VeCad647prelabbeled_DAPI_siCTR_3.tif	69
																	349	0							348	3	3							354	Exp1_130317_No EGTA_siCTR_3.tif	23			354	Exp2_17517_30minpulse_2hrecovery_VeCad488staining_VeCad647prelabbeled_DAPI_siYapTaz_3.tif	56
																	350	4	1						349	0								355	Exp1_130317_No EGTA_siYapTaz_2.tif	51			355	Exp3_19517_30minpulse_2hrecovery_VeCad488staining_VeCad647prelabbeled_DAPI_siYapTaz_5.tif	74
																	351	1	3						350	5	1							356	Exp1_130317_No EGTA_siCTR_2.tif	47			356	Exp3_19517_30minpulse_2hrecovery_VeCad488staining_VeCad647prelabbeled_DAPI_siCTR_2.tif	50
																	352	1	3						351	0								357	Exp1_130317_No EGTA_siYapTaz_1.tif	63			357	Exp2_17517_30minpulse_2hrecovery_VeCad488staining_VeCad647prelabbeled_DAPI_siCTR_2.tif	80
																	353	1	3						352	0								358	Exp1_130317_No EGTA_siYapTaz_5.tif	0			358	Exp2_17517_30minpulse_2hrecovery_VeCad488staining_VeCad647prelabbeled_DAPI_siCTR_4.tif	4
																	354	5	3						353	0								359	MAX_No EGTA - 2h CM - siYapTaz - 5.tif	96			359	Exp2_17517_30minpulse_2hrecovery_VeCad488staining_VeCad647prelabbeled_DAPI_siYapTaz_2.tif	70
																	355	0							354	1	2							360	MAX_No EGTA - 2h CM - siCTR - 4.tif	28			360	Exp3_19517_30minpulse_2hrecovery_VeCad488staining_VeCad647prelabbeled_DAPI_siCTR_4.tif	15
																	356	1	3						355	0								361	Exp1_130317_No EGTA_siCTR_4.tif	92			361	Exp3_19517_30minpulse_2hrecovery_VeCad488staining_VeCad647prelabbeled_DAPI_siYapTaz_5.tif	66
																	357	1	2						356	0								362	MAX_No EGTA - 2h CM - siCTR - 5.tif	31			362	Exp2_17517_30minpulse_2hrecovery_VeCad488staining_VeCad647prelabbeled_DAPI_siYapTaz_4.tif	40
																	358	5	3						357	4	1							363	MAX_No EGTA - 2h CM - siCTR - 3.tif	32			363	Exp3_19517_30minpulse_2hrecovery_VeCad488staining_VeCad647prelabbeled_DAPI_siYapTaz_5.tif	10
																	359	0							358	4	1							364	MAX_No EGTA - 2h CM - siYapTaz - 4.tif	26			364	Exp2_17517_30minpulse_2hrecovery_VeCad488staining_VeCad647prelabbeled_DAPI_siYapTaz_1.tif	47
																	360	2	1						359	1	3							365	MAX_No EGTA - 2h CM - siYapTaz - 3.tif	3			365	Exp2_17517_30minpulse_2hrecovery_VeCad488staining_VeCad647prelabbeled_DAPI_siYapTaz_5.tif	28
																	361	4	1						360	0								366	Exp1_130317_No EGTA_siCTR_1.tif	16			366	Exp2_17517_30minpulse_2hrecovery_VeCad488staining_VeCad647prelabbeled_DAPI_siCTR_3.tif	20
																	362	0							361	0								367	Exp1_130317_No EGTA_siYapTaz_1.tif	30			367	Exp3_19517_30minpulse_2hrecovery_VeCad488staining_VeCad647prelabbeled_DAPI_siYapTaz_4.tif	8
																	363	3	1						362	1	2							368	Exp1_130317_No EGTA_siCTR_1.tif	55			368	Exp2_17517_30minpulse_2hrecovery_VeCad488staining_VeCad647prelabbeled_DAPI_siCTR_1.tif	13
																	364	0							363	2	2							369	Exp1_130317_No EGTA_siYapTaz_3.tif	68			369	Exp2_17517_30minpulse_2hrecovery_VeCad488staining_VeCad647prelabbeled_DAPI_siYapTaz_2.tif	81
																	365	0							364	0								370	Exp1_130317_No EGTA_siYapTaz_3.tif	70			370	Exp2_17517_30minpulse_2hrecovery_VeCad488staining_VeCad647prelabbeled_DAPI_siCTR_5.tif	31
																	366	0							365	0								371	MAX_No EGTA - 2h CM - siYapTaz - 4.tif	48			371	Exp2_17517_30minpulse_2hrecovery_VeCad488staining_VeCad647prelabbeled_DAPI_siYapTaz_5.tif	62
																	367	1	3						366	1	3							372	MAX_No EGTA - 2h CM - siCTR - 4.tif	59			372	Exp3_19517_30minpulse_2hrecovery_VeCad488staining_VeCad647prelabbeled_DAPI_siYapTaz_2.tif	42
																	368	0							367	0								373	Exp1_130317_No EGTA_siCTR_2.tif	2			373	Exp2_17517_30minpulse_2hrecovery_VeCad488staining_VeCad647prelabbeled_DAPI_siCTR_1.tif	25
																	369	5	3						368	4	1							374	MAX_No EGTA - 2h CM - siYapTaz - 2.tif	31			374	Exp2_17517_30minpulse_2hrecovery_VeCad488staining_VeCad647prelabbeled_DAPI_siYapTaz_5.tif	56
																	370	0							369	1	3							375	Exp1_130317_No EGTA_siYapTaz_3.tif	76			375	Exp2_17517_30minpulse_2hrecovery_VeCad488staining_VeCad647prelabbeled_DAPI_siYapTaz_2.tif	63
																	371	1	2						370	3	2							376	MAX_No EGTA - 2h CM - siYapTaz - 2.tif	21			376	Exp2_17517_30minpulse_2hrecovery_VeCad488staining_VeCad647prelabbeled_DAPI_siYapTaz_2.tif	31
																	372	2	1						371	0								377	Exp1_130317_No EGTA_siYapTaz_1.tif	74			377	Exp3_19517_30minpulse_2hrecovery_VeCad488staining_VeCad647prelabbeled_DAPI_siCTR_4.tif	87
																	373	4	3						372	0								378	MAX_No EGTA - 2h CM - siYapTaz - 3.tif	5			378	Exp2_17517_30minpulse_2hrecovery_VeCad488staining_VeCad647prelabbeled_DAPI_siCTR_2.tif	12
																	374	0							373	3	1							379	Exp1_130317_No EGTA_siCTR_4.tif	37			379	Exp3_19517_30minpulse_2hrecovery_VeCad488staining_VeCad647prelabbeled_DAPI_siCTR_3.tif	62
																	375	1	2						374	0								380	MAX_No EGTA - 2h CM - siCTR - 1.tif	14			380	Exp3_19517_30minpulse_2hrecovery_VeCad488staining_VeCad647prelabbeled_DAPI_siCTR_1.tif	36
																	376	0							375	5	2							381	Exp1_130317_No EGTA_siYapTaz_2.tif	3			381	Exp2_17517_30minpulse_2hrecovery_VeCad488staining_VeCad647prelabbeled_DAPI_siCTR_4.tif	66
																	377	1	3						376	5	3							382	Exp1_130317_No EGTA_siYapTaz_1.tif	98			382	Exp2_17517_30minpulse_2hrecovery_VeCad488staining_VeCad647prelabbeled_DAPI_siCTR_1.tif	46
																	378	3	1						377	0								383	Exp1_130317_No EGTA_siYapTaz_1.tif	95			383	Exp2_17517_30minpulse_2hrecovery_VeCad488staining_VeCad647prelabbeled_DAPI_siYapTaz_2.tif	41
																	379	0							378	0								384	Exp1_130317_No EGTA_siCTR_2.tif	73			384	Exp3_19517_30minpulse_2hrecovery_VeCad488staining_VeCad647prelabbeled_DAPI_siCTR_5.tif	78
																	380	4	1						379	0								385	MAX_No EGTA - 2h CM - siYapTaz - 1.tif	15			385	Exp3_19517_30minpulse_2hrecovery_VeCad488staining_VeCad647prelabbeled_DAPI_siYapTaz_1.tif	84
																	381	0							380	0								386	MAX_No EGTA - 2h CM - siCTR - 4.tif	10			386	Exp3_19517_30minpulse_2hrecovery_VeCad488staining_VeCad647prelabbeled_DAPI_siCTR_1.tif	51
																	382	5	3						381	0								387	MAX_No EGTA - 2h CM - siCTR - 4.tif	99			387	Exp3_19517_30minpulse_2hrecovery_VeCad488staining_VeCad647prelabbeled_DAPI_siCTR_4.tif	67
																	383	1	2						382	2	1							388	Exp1_130317_No EGTA_siYapTaz_3.tif	20			388	Exp3_19517_30minpulse_2hrecovery_VeCad488staining_VeCad647prelabbeled_DAPI_siCTR_5.tif	19
																	384	0							383	1	2							389	MAX_No EGTA - 2h CM - siCTR - 3.tif	91			389	Exp3_19517_30minpulse_2hrecovery_VeCad488staining_VeCad647prelabbeled_DAPI_siCTR_5.tif	64
																	385	0							384	0								390	MAX_No EGTA - 2h CM - siYapTaz - 5.tif	36			390	Exp3_19517_30minpulse_2hrecovery_VeCad488staining_VeCad647prelabbeled_DAPI_siYapTaz_3.tif	73
																	386	3	2						385	0								391	Exp1_130317_No EGTA_siYapTaz_4.tif	28			391	Exp3_19517_30minpulse_2hrecovery_VeCad488staining_VeCad647prelabbeled_DAPI_siCTR_2.tif	89
																	387	0							386	0								392	MAX_No EGTA - 2h CM - siYapTaz - 1.tif	6			392	Exp2_17517_30minpulse_2hrecovery_VeCad488staining_VeCad647prelabbeled_DAPI_siCTR_5.tif	6
																	388	0							387	0								393	MAX_No EGTA - 2h CM - siYapTaz - 5.tif	58			393	Exp2_17517_30minpulse_2hrecovery_VeCad488staining_VeCad647prelabbeled_DAPI_siYapTaz_2.tif	58
																	389	3	1						388	0								394	Exp1_130317_No EGTA_siYapTaz_3.tif	25			394	Exp2_17517_30minpulse_2hrecovery_VeCad488staining_VeCad647prelabbeled_DAPI_siYapTaz_2.tif	30
																	390	0							389	0								395	MAX_No EGTA - 2h CM - siYapTaz - 4.tif	27			395	Exp2_17517_30minpulse_2hrecovery_VeCad488staining_VeCad647prelabbeled_DAPI_siYapTaz_2.tif	93
																	391	5	2						390	0								396	MAX_No EGTA - 2h CM - siYapTaz - 3.tif	55			396	Exp3_19517_30minpulse_2hrecovery_VeCad488staining_VeCad647prelabbeled_DAPI_siCTR_5.tif	11
																	392	4	1						391	0								397	MAX_No EGTA - 2h CM - siCTR - 5.tif	80			397	Exp3_19517_30minpulse_2hrecovery_VeCad488staining_VeCad647prelabbeled_DAPI_siYapTaz_2.tif	23
																	393	0							392	3	1							398	Exp1_130317_No EGTA_siCTR_2.tif	33			398	Exp2_17517_30minpulse_2hrecovery_VeCad488staining_VeCad647prelabbeled_DAPI_siYapTaz_2.tif	77
																	394	0							393	2	2							399	Exp1_130317_No EGTA_siYapTaz_5.tif	86			399	Exp3_19517_30minpulse_2hrecovery_VeCad488staining_VeCad647prelabbeled_DAPI_siYapTaz_5.tif	87
																	395	5	3						394	0								400	MAX_No EGTA - 2h CM - siCTR - 5.tif	32			400	Exp3_19517_30minpulse_2hrecovery_VeCad488staining_VeCad647prelabbeled_DAPI_siCTR_2.tif	73
																	396	0							395	0								401	MAX_No EGTA - 2h CM - siCTR - 4.tif	73			401	Exp2_17517_30minpulse_2hrecovery_VeCad488staining_VeCad647prelabbeled_DAPI_siCTR_1.tif	33
																	397	2	2						396	4	3							402	Exp1_130317_No EGTA_siYapTaz_3.tif	6			402	Exp3_19517_30minpulse_2hrecovery_VeCad488staining_VeCad647prelabbeled_DAPI_siYapTaz_5.tif	76
																	398	1	2						397	1	2							403	MAX_No EGTA - 2h CM - siYapTaz - 2.tif	50			403	Exp2_17517_30minpulse_2hrecovery_VeCad488staining_VeCad647prelabbeled_DAPI_siYapTaz_5.tif	70
																	399	1	3						398	0								404	MAX_No EGTA - 2h CM - siYapTaz - 1.tif	40			404	Exp2_17517_30minpulse_2hrecovery_VeCad488staining_VeCad647prelabbeled_DAPI_siCTR_1.tif	30
																	400	4	1						399	1	3							405	Exp1_130317_No EGTA_siYapTaz_2.tif	21			405	Exp2_17517_30minpulse_2hrecovery_VeCad488staining_VeCad647prelabbeled_DAPI_siCTR_4.tif	39
																	401	5	2						400	0								406	Exp1_130317_No EGTA_siYapTaz_2.tif	41			406	Exp2_17517_30minpulse_2hrecovery_VeCad488staining_VeCad647prelabbeled_DAPI_siCTR_5.tif	43
																	402	5	3						401	4	1							407	MAX_No EGTA - 2h CM - siYapTaz - 5.tif	11			407	Exp2_17517_30minpulse_2hrecovery_VeCad488staining_VeCad647prelabbeled_DAPI_siYapTaz_3.tif	99
																	403	3	2						402	1	2							408	Exp1_130317_No EGTA_siYapTaz_2.tif	80			408	Exp3_19517_30minpulse_2hrecovery_VeCad488staining_VeCad647prelabbeled_DAPI_siYapTaz_3.tif	85
																	404	1	2						403	2	3							409	MAX_No EGTA - 2h CM - siYapTaz - 2.tif	39			409	Exp2_17517_30minpulse_2hrecovery_VeCad488staining_VeCad647prelabbeled_DAPI_siCTR_2.tif	91
																	405	0							404	2	2							410	Exp1_130317_No EGTA_siCTR_5.tif	5			410	Exp3_19517_30minpulse_2hrecovery_VeCad488staining_VeCad647prelabbeled_DAPI_siCTR_3.tif	77
																	406	2	3						405	0								411	Exp1_130317_No EGTA_siYapTaz_1.tif	67			411	Exp3_19517_30minpulse_2hrecovery_VeCad488staining_VeCad647prelabbeled_DAPI_siCTR_2.tif	96
																	407	0							406	0								412	MAX_No EGTA - 2h CM - siCTR - 4.tif	94			412	Exp2_17517_30minpulse_2hrecovery_VeCad488staining_VeCad647prelabbeled_DAPI_siYapTaz_4.tif	78
																	408	0							407	0								413	Exp1_130317_No EGTA_siCTR_3.tif	95			413	Exp2_17517_30minpulse_2hrecovery_VeCad488staining_VeCad647prelabbeled_DAPI_siCTR_1.tif	35
																	409	4	1		4	2			408	0								414	MAX_No EGTA - 2h CM - siYapTaz - 3.tif	65			414	Exp2_17517_30minpulse_2hrecovery_VeCad488staining_VeCad647prelabbeled_DAPI_siCTR_1.tif	1
																	410	5	3						409	0								415	Exp1_130317_No EGTA_siYapTaz_2.tif	56			415	Exp2_17517_30minpulse_2hrecovery_VeCad488staining_VeCad647prelabbeled_DAPI_siCTR_4.tif	16
																	411	0							410	4	3							416	Exp1_130317_No EGTA_siCTR_5.tif	78			416	Exp3_19517_30minpulse_2hrecovery_VeCad488staining_VeCad647prelabbeled_DAPI_siCTR_1.tif	45
																	412	2	2						411	0								417	Exp1_130317_No EGTA_siCTR_5.tif	67			417	Exp3_19517_30minpulse_2hrecovery_VeCad488staining_VeCad647prelabbeled_DAPI_siCTR_1.tif	64
																	413	0							412	1	3							418	MAX_No EGTA - 2h CM - siCTR - 5.tif	42			418	Exp2_17517_30minpulse_2hrecovery_VeCad488staining_VeCad647prelabbeled_DAPI_siCTR_5.tif	49
																	414	1	2						413	3	2							419	MAX_No EGTA - 2h CM - siYapTaz - 4.tif	57			419	Exp2_17517_30minpulse_2hrecovery_VeCad488staining_VeCad647prelabbeled_DAPI_siCTR_4.tif	45
																	415	5	3						414	3	1							420	MAX_No EGTA - 2h CM - siYapTaz - 5.tif	47			420	Exp3_19517_30minpulse_2hrecovery_VeCad488staining_VeCad647prelabbeled_DAPI_siCTR_1.tif	99
																	416	3	3						415	3	1							421	Exp1_130317_No EGTA_siCTR_5.tif	0			421	Exp3_19517_30minpulse_2hrecovery_VeCad488staining_VeCad647prelabbeled_DAPI_siCTR_3.tif	2
																	417	3	3						416	5	3							422	MAX_No EGTA - 2h CM - siCTR - 1.tif	91			422	Exp3_19517_30minpulse_2hrecovery_VeCad488staining_VeCad647prelabbeled_DAPI_siYapTaz_5.tif	78
																	418	4	1						417	0								423	Exp1_130317_No EGTA_siCTR_4.tif	79			423	Exp2_17517_30minpulse_2hrecovery_VeCad488staining_VeCad647prelabbeled_DAPI_siYapTaz_1.tif	45
																	419	4	1		4	3			418	2	2							424	MAX_No EGTA - 2h CM - siYapTaz - 5.tif	75			424	Exp2_17517_30minpulse_2hrecovery_VeCad488staining_VeCad647prelabbeled_DAPI_siCTR_4.tif	64
																	420	1	3						419	3	1							425	MAX_No EGTA - 2h CM - siYapTaz - 2.tif	97			425	Exp3_19517_30minpulse_2hrecovery_VeCad488staining_VeCad647prelabbeled_DAPI_siCTR_4.tif	0
																	421	0							420	0								426	Exp1_130317_No EGTA_siYapTaz_4.tif	65			426	Exp3_19517_30minpulse_2hrecovery_VeCad488staining_VeCad647prelabbeled_DAPI_siCTR_5.tif	27
																	422	2	1						421	0								427	Exp1_130317_No EGTA_siCTR_3.tif	48			427	Exp2_17517_30minpulse_2hrecovery_VeCad488staining_VeCad647prelabbeled_DAPI_siCTR_2.tif	97
																	423	0							422	0								428	Exp1_130317_No EGTA_siCTR_3.tif	36			428	Exp2_17517_30minpulse_2hrecovery_VeCad488staining_VeCad647prelabbeled_DAPI_siCTR_1.tif	43
																	424	0							423	0								429	Exp1_130317_No EGTA_siYapTaz_2.tif	78			429	Exp3_19517_30minpulse_2hrecovery_VeCad488staining_VeCad647prelabbeled_DAPI_siYapTaz_4.tif	0
																	425	5	3		5	2			424	3	1							430	Exp1_130317_No EGTA_siYapTaz_3.tif	31			430	Exp2_17517_30minpulse_2hrecovery_VeCad488staining_VeCad647prelabbeled_DAPI_siYapTaz_3.tif	33
																	426	5	3						425	0								431	MAX_No EGTA - 2h CM - siYapTaz - 2.tif	8			431	Exp3_19517_30minpulse_2hrecovery_VeCad488staining_VeCad647prelabbeled_DAPI_siYapTaz_2.tif	71
																	427	4	1						426	0								432	Exp1_130317_No EGTA_siYapTaz_5.tif	85			432	Exp3_19517_30minpulse_2hrecovery_VeCad488staining_VeCad647prelabbeled_DAPI_siCTR_3.tif	7
																	428	0							427	3	2							433	MAX_No EGTA - 2h CM - siCTR - 3.tif	24			433	Exp2_17517_30minpulse_2hrecovery_VeCad488staining_VeCad647prelabbeled_DAPI_siYapTaz_4.tif	62
																	429	2	2						428	4	1							434	Exp1_130317_No EGTA_siCTR_2.tif	75			434	Exp2_17517_30minpulse_2hrecovery_VeCad488staining_VeCad647prelabbeled_DAPI_siCTR_4.tif	52
																	430	0							429	1	2							435	Exp1_130317_No EGTA_siCTR_5.tif	93			435	Exp3_19517_30minpulse_2hrecovery_VeCad488staining_VeCad647prelabbeled_DAPI_siCTR_2.tif	87
																	431	2	3						430	0								436	Exp1_130317_No EGTA_siYapTaz_1.tif	13			436	Exp2_17517_30minpulse_2hrecovery_VeCad488staining_VeCad647prelabbeled_DAPI_siCTR_3.tif	17
																	432	0							431	5	2							437	Exp1_130317_No EGTA_siYapTaz_2.tif	17			437	Exp3_19517_30minpulse_2hrecovery_VeCad488staining_VeCad647prelabbeled_DAPI_siYapTaz_1.tif	58
																	433	3	1						432	4	3							438	MAX_No EGTA - 2h CM - siCTR - 2.tif	81			438	Exp3_19517_30minpulse_2hrecovery_VeCad488staining_VeCad647prelabbeled_DAPI_siYapTaz_3.tif	0
																	434	0							433	0								439	Exp1_130317_No EGTA_siYapTaz_5.tif	34			439	Exp3_19517_30minpulse_2hrecovery_VeCad488staining_VeCad647prelabbeled_DAPI_siYapTaz_2.tif	69
																	435	0							434	0								440	Exp1_130317_No EGTA_siYapTaz_4.tif	83			440	Exp3_19517_30minpulse_2hrecovery_VeCad488staining_VeCad647prelabbeled_DAPI_siYapTaz_4.tif	10
																	436	2	2						435	4	1							441	Exp1_130317_No EGTA_siCTR_1.tif	40			441	Exp3_19517_30minpulse_2hrecovery_VeCad488staining_VeCad647prelabbeled_DAPI_siYapTaz_5.tif	38
																	437	0							436	2	3							442	Exp1_130317_No EGTA_siCTR_5.tif	23			442	Exp3_19517_30minpulse_2hrecovery_VeCad488staining_VeCad647prelabbeled_DAPI_siYapTaz_3.tif	32
																	438	0							437	0								443	MAX_No EGTA - 2h CM - siYapTaz - 5.tif	69			443	Exp2_17517_30minpulse_2hrecovery_VeCad488staining_VeCad647prelabbeled_DAPI_siYapTaz_5.tif	11
																	439	0							438	0								444	MAX_No EGTA - 2h CM - siCTR - 5.tif	36			444	Exp2_17517_30minpulse_2hrecovery_VeCad488staining_VeCad647prelabbeled_DAPI_siYapTaz_4.tif	31
																	440	1	2						439	0								445	MAX_No EGTA - 2h CM - siYapTaz - 3.tif	51			445	Exp2_17517_30minpulse_2hrecovery_VeCad488staining_VeCad647prelabbeled_DAPI_siYapTaz_2.tif	25
																	441	0							440	0								446	MAX_No EGTA - 2h CM - siYapTaz - 4.tif	88			446	Exp3_19517_30minpulse_2hrecovery_VeCad488staining_VeCad647prelabbeled_DAPI_siYapTaz_5.tif	40
																	442	5	3						441	1	1							447	Exp1_130317_No EGTA_siCTR_3.tif	40			447	Exp3_19517_30minpulse_2hrecovery_VeCad488staining_VeCad647prelabbeled_DAPI_siYapTaz_2.tif	89
																	443	2	2						442	2	2							448	MAX_No EGTA - 2h CM - siCTR - 3.tif	41			448	Exp3_19517_30minpulse_2hrecovery_VeCad488staining_VeCad647prelabbeled_DAPI_siCTR_1.tif	19
																	444	0							443	0								449	MAX_No EGTA - 2h CM - siYapTaz - 1.tif	31			449	Exp3_19517_30minpulse_2hrecovery_VeCad488staining_VeCad647prelabbeled_DAPI_siYapTaz_1.tif	70
																	445	2	3						444	0								450	MAX_No EGTA - 2h CM - siCTR - 2.tif	85			450	Exp2_17517_30minpulse_2hrecovery_VeCad488staining_VeCad647prelabbeled_DAPI_siYapTaz_5.tif	69
																	446	2	2						445	5	3							451	Exp1_130317_No EGTA_siCTR_4.tif	39			451	Exp2_17517_30minpulse_2hrecovery_VeCad488staining_VeCad647prelabbeled_DAPI_siCTR_5.tif	98
																	447	5	3						446	0								452	Exp1_130317_No EGTA_siYapTaz_4.tif	21			452	Exp2_17517_30minpulse_2hrecovery_VeCad488staining_VeCad647prelabbeled_DAPI_siYapTaz_4.tif	52
																	448	3	1						447	0								453	Exp1_130317_No EGTA_siYapTaz_4.tif	90			453	Exp2_17517_30minpulse_2hrecovery_VeCad488staining_VeCad647prelabbeled_DAPI_siYapTaz_1.tif	92
																	449	5	1						448	0								454	Exp1_130317_No EGTA_siYapTaz_2.tif	92			454	Exp2_17517_30minpulse_2hrecovery_VeCad488staining_VeCad647prelabbeled_DAPI_siCTR_3.tif	60
																	450	4	1						449	2	2							455	MAX_No EGTA - 2h CM - siCTR - 1.tif	71			455	Exp2_17517_30minpulse_2hrecovery_VeCad488staining_VeCad647prelabbeled_DAPI_siCTR_4.tif	86
																	451	0							450	1	2							456	Exp1_130317_No EGTA_siCTR_1.tif	58			456	Exp3_19517_30minpulse_2hrecovery_VeCad488staining_VeCad647prelabbeled_DAPI_siYapTaz_5.tif	98
																	452	5	2						451	0								457	MAX_No EGTA - 2h CM - siYapTaz - 3.tif	80			457	Exp3_19517_30minpulse_2hrecovery_VeCad488staining_VeCad647prelabbeled_DAPI_siCTR_5.tif	47
																	453	0							452	0								458	MAX_No EGTA - 2h CM - siYapTaz - 2.tif	36			458	Exp3_19517_30minpulse_2hrecovery_VeCad488staining_VeCad647prelabbeled_DAPI_siYapTaz_5.tif	14
																	454	5	3						453	5	3							459	Exp1_130317_No EGTA_siCTR_4.tif	61			459	Exp2_17517_30minpulse_2hrecovery_VeCad488staining_VeCad647prelabbeled_DAPI_siCTR_3.tif	25
																	455	4	1						454	2	3							460	MAX_No EGTA - 2h CM - siYapTaz - 2.tif	44			460	Exp2_17517_30minpulse_2hrecovery_VeCad488staining_VeCad647prelabbeled_DAPI_siYapTaz_5.tif	6
																	456	0							455	0								461	Exp1_130317_No EGTA_siYapTaz_3.tif	86			461	Exp2_17517_30minpulse_2hrecovery_VeCad488staining_VeCad647prelabbeled_DAPI_siYapTaz_3.tif	16
																	457	3	2						456	0								462	Exp1_130317_No EGTA_siCTR_2.tif	81			462	Exp3_19517_30minpulse_2hrecovery_VeCad488staining_VeCad647prelabbeled_DAPI_siCTR_2.tif	34
																	458	1	1						457	3	1							463	Exp1_130317_No EGTA_siCTR_5.tif	97			463	Exp2_17517_30minpulse_2hrecovery_VeCad488staining_VeCad647prelabbeled_DAPI_siCTR_1.tif	78
																	459	0							458	0								464	MAX_No EGTA - 2h CM - siCTR - 1.tif	79			464	Exp3_19517_30minpulse_2hrecovery_VeCad488staining_VeCad647prelabbeled_DAPI_siYapTaz_5.tif	16
																	460	0							459	2	1							465	Exp1_130317_No EGTA_siCTR_5.tif	80			465	Exp2_17517_30minpulse_2hrecovery_VeCad488staining_VeCad647prelabbeled_DAPI_siCTR_5.tif	5
																	461	0							460	0								466	Exp1_130317_No EGTA_siCTR_1.tif	60			466	Exp3_19517_30minpulse_2hrecovery_VeCad488staining_VeCad647prelabbeled_DAPI_siYapTaz_2.tif	57
																	462	0							461	0								467	Exp1_130317_No EGTA_siYapTaz_3.tif	35			467	Exp3_19517_30minpulse_2hrecovery_VeCad488staining_VeCad647prelabbeled_DAPI_siCTR_1.tif	65
																	463	0							462	0								468	MAX_No EGTA - 2h CM - siCTR - 5.tif	3			468	Exp3_19517_30minpulse_2hrecovery_VeCad488staining_VeCad647prelabbeled_DAPI_siYapTaz_1.tif	52
																	464	4	1						463	0								469	Exp1_130317_No EGTA_siCTR_4.tif	78			469	Exp3_19517_30minpulse_2hrecovery_VeCad488staining_VeCad647prelabbeled_DAPI_siYapTaz_5.tif	96
																	465	0							464	0								470	Exp1_130317_No EGTA_siYapTaz_5.tif	59			470	Exp2_17517_30minpulse_2hrecovery_VeCad488staining_VeCad647prelabbeled_DAPI_siCTR_4.tif	84
																	466	1	3						465	3	1							471	MAX_No EGTA - 2h CM - siYapTaz - 5.tif	71			471	Exp2_17517_30minpulse_2hrecovery_VeCad488staining_VeCad647prelabbeled_DAPI_siCTR_2.tif	76
																	467	0							466	0								472	Exp1_130317_No EGTA_siCTR_1.tif	7			472	Exp2_17517_30minpulse_2hrecovery_VeCad488staining_VeCad647prelabbeled_DAPI_siYapTaz_3.tif	1
																	468	0							467	0								473	MAX_No EGTA - 2h CM - siYapTaz - 4.tif	72			473	Exp2_17517_30minpulse_2hrecovery_VeCad488staining_VeCad647prelabbeled_DAPI_siYapTaz_2.tif	89
																	469	0							468	0								474	Exp1_130317_No EGTA_siCTR_5.tif	1			474	Exp2_17517_30minpulse_2hrecovery_VeCad488staining_VeCad647prelabbeled_DAPI_siCTR_3.tif	96
																	470	5	3						469	3	2							475	MAX_No EGTA - 2h CM - siYapTaz - 3.tif	99			475	Exp3_19517_30minpulse_2hrecovery_VeCad488staining_VeCad647prelabbeled_DAPI_siYapTaz_5.tif	1
																	471	1	3						470	0								476	MAX_No EGTA - 2h CM - siCTR - 4.tif	40			476	Exp3_19517_30minpulse_2hrecovery_VeCad488staining_VeCad647prelabbeled_DAPI_siYapTaz_4.tif	78
																	472	0							471	0								477	Exp1_130317_No EGTA_siCTR_3.tif	91			477	Exp2_17517_30minpulse_2hrecovery_VeCad488staining_VeCad647prelabbeled_DAPI_siYapTaz_5.tif	26
																	473	4	1						472	1	3							478	MAX_No EGTA - 2h CM - siYapTaz - 1.tif	66			478	Exp2_17517_30minpulse_2hrecovery_VeCad488staining_VeCad647prelabbeled_DAPI_siYapTaz_4.tif	60
																	474	0							473	0								479	MAX_No EGTA - 2h CM - siYapTaz - 3.tif	6			479	Exp3_19517_30minpulse_2hrecovery_VeCad488staining_VeCad647prelabbeled_DAPI_siCTR_5.tif	84
																	475	1	1						474	2	3							480	Exp1_130317_No EGTA_siCTR_4.tif	36			480	Exp3_19517_30minpulse_2hrecovery_VeCad488staining_VeCad647prelabbeled_DAPI_siYapTaz_1.tif	28
																	476	5	2						475	1	2							481	Exp1_130317_No EGTA_siCTR_3.tif	51			481	Exp3_19517_30minpulse_2hrecovery_VeCad488staining_VeCad647prelabbeled_DAPI_siCTR_3.tif	11
																	477	5	3						476	5	3							482	MAX_No EGTA - 2h CM - siYapTaz - 3.tif	79			482	Exp2_17517_30minpulse_2hrecovery_VeCad488staining_VeCad647prelabbeled_DAPI_siYapTaz_5.tif	86
																	478	4	2						477	1	2							483	MAX_No EGTA - 2h CM - siYapTaz - 3.tif	87			483	Exp2_17517_30minpulse_2hrecovery_VeCad488staining_VeCad647prelabbeled_DAPI_siYapTaz_2.tif	62
																	479	1	2						478	1	3							484	Exp1_130317_No EGTA_siCTR_4.tif	69			484	Exp2_17517_30minpulse_2hrecovery_VeCad488staining_VeCad647prelabbeled_DAPI_siCTR_1.tif	48
																	480	0							479	0								485	MAX_No EGTA - 2h CM - siCTR - 2.tif	32			485	Exp3_19517_30minpulse_2hrecovery_VeCad488staining_VeCad647prelabbeled_DAPI_siCTR_3.tif	37
																	481	5	3						480	1	2							486	MAX_No EGTA - 2h CM - siYapTaz - 4.tif	97			486	Exp3_19517_30minpulse_2hrecovery_VeCad488staining_VeCad647prelabbeled_DAPI_siCTR_2.tif	44
																	482	0							481	2	1							487	MAX_No EGTA - 2h CM - siYapTaz - 5.tif	73			487	Exp3_19517_30minpulse_2hrecovery_VeCad488staining_VeCad647prelabbeled_DAPI_siYapTaz_4.tif	59
																	483	0							482	0								488	Exp1_130317_No EGTA_siYapTaz_4.tif	42			488	Exp2_17517_30minpulse_2hrecovery_VeCad488staining_VeCad647prelabbeled_DAPI_siCTR_4.tif	14
																	484	0							483	0								489	MAX_No EGTA - 2h CM - siCTR - 1.tif	7			489	Exp2_17517_30minpulse_2hrecovery_VeCad488staining_VeCad647prelabbeled_DAPI_siCTR_2.tif	44
																	485	1	1						484	4	1		3	2				490	Exp1_130317_No EGTA_siYapTaz_2.tif	19			490	Exp3_19517_30minpulse_2hrecovery_VeCad488staining_VeCad647prelabbeled_DAPI_siYapTaz_4.tif	39
																	486	2	3						485	0								491	MAX_No EGTA - 2h CM - siYapTaz - 4.tif	89			491	Exp2_17517_30minpulse_2hrecovery_VeCad488staining_VeCad647prelabbeled_DAPI_siYapTaz_5.tif	84
																	487	2	2						486	0								492	Exp1_130317_No EGTA_siCTR_1.tif	83			492	Exp3_19517_30minpulse_2hrecovery_VeCad488staining_VeCad647prelabbeled_DAPI_siCTR_2.tif	1
																	488	5	3						487	0								493	Exp1_130317_No EGTA_siCTR_3.tif	18			493	Exp2_17517_30minpulse_2hrecovery_VeCad488staining_VeCad647prelabbeled_DAPI_siYapTaz_5.tif	2
																	489	4	1						488	3	1							494	Exp1_130317_No EGTA_siYapTaz_2.tif	61			494	Exp3_19517_30minpulse_2hrecovery_VeCad488staining_VeCad647prelabbeled_DAPI_siYapTaz_1.tif	47
																	490	5	3						489	0								495	MAX_No EGTA - 2h CM - siYapTaz - 4.tif	19			495	Exp2_17517_30minpulse_2hrecovery_VeCad488staining_VeCad647prelabbeled_DAPI_siCTR_5.tif	46
																	491	3	1		3	3			490	1	2							496	Exp1_130317_No EGTA_siCTR_2.tif	41			496	Exp3_19517_30minpulse_2hrecovery_VeCad488staining_VeCad647prelabbeled_DAPI_siCTR_2.tif	88
																	492	2	2						491	0								497	Exp1_130317_No EGTA_siCTR_1.tif	47			497	Exp2_17517_30minpulse_2hrecovery_VeCad488staining_VeCad647prelabbeled_DAPI_siYapTaz_4.tif	76
																	493	4	1		4	3			492	0								498	MAX_No EGTA - 2h CM - siCTR - 5.tif	49			498	Exp2_17517_30minpulse_2hrecovery_VeCad488staining_VeCad647prelabbeled_DAPI_siCTR_1.tif	57
																	494	5	2						493	2	3							499	Exp1_130317_No EGTA_siCTR_3.tif	12			499	Exp3_19517_30minpulse_2hrecovery_VeCad488staining_VeCad647prelabbeled_DAPI_siYapTaz_2.tif	20
																	495	3	2						494	0								500	Exp1_130317_No EGTA_siYapTaz_5.tif	96			500	Exp3_19517_30minpulse_2hrecovery_VeCad488staining_VeCad647prelabbeled_DAPI_siYapTaz_3.tif	88
																	496	1	3						495	2	1							501	Exp1_130317_No EGTA_siCTR_5.tif	44			501	Exp3_19517_30minpulse_2hrecovery_VeCad488staining_VeCad647prelabbeled_DAPI_siYapTaz_1.tif	42
																	497	0							496	0								502	MAX_No EGTA - 2h CM - siCTR - 1.tif	47			502	Exp3_19517_30minpulse_2hrecovery_VeCad488staining_VeCad647prelabbeled_DAPI_siCTR_2.tif	93
																	498	0							497	5	3							503	MAX_No EGTA - 2h CM - siCTR - 4.tif	21			503	Exp2_17517_30minpulse_2hrecovery_VeCad488staining_VeCad647prelabbeled_DAPI_siCTR_3.tif	10
																	499	0							498	3	1							504	Exp1_130317_No EGTA_siYapTaz_5.tif	92			504	Exp2_17517_30minpulse_2hrecovery_VeCad488staining_VeCad647prelabbeled_DAPI_siCTR_3.tif	47
																	500	5	3						499	1	2							505	Exp1_130317_No EGTA_siCTR_3.tif	75			505	Exp2_17517_30minpulse_2hrecovery_VeCad488staining_VeCad647prelabbeled_DAPI_siCTR_4.tif	41
																	501	5	3						500	2	2							506	Exp1_130317_No EGTA_siCTR_4.tif	33			506	Exp2_17517_30minpulse_2hrecovery_VeCad488staining_VeCad647prelabbeled_DAPI_siYapTaz_2.tif	40
																	502	0							501	0								507	MAX_No EGTA - 2h CM - siCTR - 4.tif	92			507	Exp2_17517_30minpulse_2hrecovery_VeCad488staining_VeCad647prelabbeled_DAPI_siYapTaz_3.tif	73
																	503	2	2						502	5	1							508	MAX_No EGTA - 2h CM - siCTR - 1.tif	97			508	Exp3_19517_30minpulse_2hrecovery_VeCad488staining_VeCad647prelabbeled_DAPI_siCTR_3.tif	92
																	504	5	3						503	0								509	Exp1_130317_No EGTA_siYapTaz_4.tif	94			509	Exp3_19517_30minpulse_2hrecovery_VeCad488staining_VeCad647prelabbeled_DAPI_siYapTaz_2.tif	1
																	505	0							504	0								510	Exp1_130317_No EGTA_siCTR_1.tif	26			510	Exp2_17517_30minpulse_2hrecovery_VeCad488staining_VeCad647prelabbeled_DAPI_siYapTaz_5.tif	90
																	506	1	2						505	0								511	Exp1_130317_No EGTA_siYapTaz_2.tif	52			511	Exp2_17517_30minpulse_2hrecovery_VeCad488staining_VeCad647prelabbeled_DAPI_siYapTaz_2.tif	68
																	507	1	3						506	5	3							512	MAX_No EGTA - 2h CM - siCTR - 3.tif	31			512	Exp3_19517_30minpulse_2hrecovery_VeCad488staining_VeCad647prelabbeled_DAPI_siYapTaz_2.tif	19
																	508	3	1						507	0								513	MAX_No EGTA - 2h CM - siYapTaz - 5.tif	14			513	Exp3_19517_30minpulse_2hrecovery_VeCad488staining_VeCad647prelabbeled_DAPI_siCTR_3.tif	48
																	509	1	3						508	0								514	Exp1_130317_No EGTA_siYapTaz_5.tif	71			514	Exp3_19517_30minpulse_2hrecovery_VeCad488staining_VeCad647prelabbeled_DAPI_siCTR_5.tif	13
																	510	0							509	0								515	Exp1_130317_No EGTA_siYapTaz_1.tif	73			515	Exp2_17517_30minpulse_2hrecovery_VeCad488staining_VeCad647prelabbeled_DAPI_siCTR_2.tif	75
																	511	5	3						510	0								516	MAX_No EGTA - 2h CM - siCTR - 2.tif	95			516	Exp2_17517_30minpulse_2hrecovery_VeCad488staining_VeCad647prelabbeled_DAPI_siYapTaz_5.tif	5
																	512	0							511	2	2							517	Exp1_130317_No EGTA_siYapTaz_1.tif	48			517	Exp2_17517_30minpulse_2hrecovery_VeCad488staining_VeCad647prelabbeled_DAPI_siCTR_5.tif	11
																	513	1	3						512	0								518	Exp1_130317_No EGTA_siYapTaz_5.tif	68			518	Exp2_17517_30minpulse_2hrecovery_VeCad488staining_VeCad647prelabbeled_DAPI_siCTR_2.tif	27
																	514	5	3						513	4	1							519	MAX_No EGTA - 2h CM - siYapTaz - 3.tif	27			519	Exp2_17517_30minpulse_2hrecovery_VeCad488staining_VeCad647prelabbeled_DAPI_siYapTaz_4.tif	19
																	515	1	2						514	0								520	MAX_No EGTA - 2h CM - siYapTaz - 1.tif	89			520	Exp3_19517_30minpulse_2hrecovery_VeCad488staining_VeCad647prelabbeled_DAPI_siYapTaz_3.tif	82
																	516	0							515	0								521	Exp1_130317_No EGTA_siCTR_2.tif	13			521	Exp3_19517_30minpulse_2hrecovery_VeCad488staining_VeCad647prelabbeled_DAPI_siYapTaz_4.tif	81
																	517	3	3						516	1	2							522	Exp1_130317_No EGTA_siYapTaz_5.tif	56			522	Exp3_19517_30minpulse_2hrecovery_VeCad488staining_VeCad647prelabbeled_DAPI_siCTR_3.tif	94
																	518	0							517	4	2							523	MAX_No EGTA - 2h CM - siCTR - 4.tif	8			523	Exp2_17517_30minpulse_2hrecovery_VeCad488staining_VeCad647prelabbeled_DAPI_siYapTaz_3.tif	51
																	519	0							518	0								524	Exp1_130317_No EGTA_siCTR_2.tif	56			524	Exp3_19517_30minpulse_2hrecovery_VeCad488staining_VeCad647prelabbeled_DAPI_siYapTaz_5.tif	32
																	520	1	2						519	1	3							525	MAX_No EGTA - 2h CM - siCTR - 5.tif	47			525	Exp3_19517_30minpulse_2hrecovery_VeCad488staining_VeCad647prelabbeled_DAPI_siYapTaz_2.tif	25
																	521	5	3						520	1	1							526	MAX_No EGTA - 2h CM - siYapTaz - 2.tif	86			526	Exp3_19517_30minpulse_2hrecovery_VeCad488staining_VeCad647prelabbeled_DAPI_siCTR_2.tif	47
																	522	0							521	5	2							527	MAX_No EGTA - 2h CM - siYapTaz - 4.tif	95			527	Exp3_19517_30minpulse_2hrecovery_VeCad488staining_VeCad647prelabbeled_DAPI_siYapTaz_3.tif	65
																	523	3	3		2	2			522	0								528	MAX_No EGTA - 2h CM - siYapTaz - 2.tif	62			528	Exp2_17517_30minpulse_2hrecovery_VeCad488staining_VeCad647prelabbeled_DAPI_siCTR_5.tif	47
																	524	0							523	1	3							529	MAX_No EGTA - 2h CM - siCTR - 2.tif	9			529	Exp3_19517_30minpulse_2hrecovery_VeCad488staining_VeCad647prelabbeled_DAPI_siYapTaz_4.tif	1
																	525	4	1						524	2	3							530	MAX_No EGTA - 2h CM - siYapTaz - 4.tif	51			530	Exp3_19517_30minpulse_2hrecovery_VeCad488staining_VeCad647prelabbeled_DAPI_siYapTaz_1.tif	31
																	526	0							525	0								531	Exp1_130317_No EGTA_siCTR_1.tif	4			531	Exp3_19517_30minpulse_2hrecovery_VeCad488staining_VeCad647prelabbeled_DAPI_siYapTaz_5.tif	54
																	527	0							526	0								532	Exp1_130317_No EGTA_siYapTaz_1.tif	1			532	Exp3_19517_30minpulse_2hrecovery_VeCad488staining_VeCad647prelabbeled_DAPI_siCTR_3.tif	89
																	528	1	2						527	1	2							533	MAX_No EGTA - 2h CM - siCTR - 1.tif	6			533	Exp2_17517_30minpulse_2hrecovery_VeCad488staining_VeCad647prelabbeled_DAPI_siCTR_2.tif	60
																	529	0							528	2	1							534	MAX_No EGTA - 2h CM - siYapTaz - 5.tif	99			534	Exp2_17517_30minpulse_2hrecovery_VeCad488staining_VeCad647prelabbeled_DAPI_siYapTaz_3.tif	12
																	530	2	2						529	1	2							535	MAX_No EGTA - 2h CM - siCTR - 3.tif	14			535	Exp2_17517_30minpulse_2hrecovery_VeCad488staining_VeCad647prelabbeled_DAPI_siCTR_4.tif	80
																	531	0							530	0								536	MAX_No EGTA - 2h CM - siCTR - 2.tif	76			536	Exp3_19517_30minpulse_2hrecovery_VeCad488staining_VeCad647prelabbeled_DAPI_siYapTaz_2.tif	55
																	532	0							531	1	3							537	MAX_No EGTA - 2h CM - siCTR - 4.tif	15			537	Exp2_17517_30minpulse_2hrecovery_VeCad488staining_VeCad647prelabbeled_DAPI_siYapTaz_1.tif	41
																	533	2	1						532	0								538	MAX_No EGTA - 2h CM - siYapTaz - 2.tif	38			538	Exp2_17517_30minpulse_2hrecovery_VeCad488staining_VeCad647prelabbeled_DAPI_siCTR_4.tif	63
[truncated: 1,461 more rows]

## Sheet: Figure 5M, N
Figure 5M - VE-Cadherin mEos immobile fraction.
[truncated: 36 more rows]
