# Supplementary material for: YAP and TAZ regulate adherens junction dynamics and endothelial cell distribution during vascular development
Source: eLife. 2018 Feb 5;7:e31037. doi: 10.7554/eLife.31037 (PMC5814147; doi:10.7554/eLife.31037)
Supplement: Figure 6—source data 1. [file elife-31037-fig6-data1.xlsx]

## Sheet: Figure 6I
Figure 6I - Quantification of wound closure at 16 hours in YAP, TAZ and YAP/TAZ knockdown HUVECs and control
EXP1							EXP2							EXP3
	Area of wound							Area of wound							Area of wound
	0h	16h	% of closure	Average of 3	St deviation			0h	16h	% of closure	Average of 3	St deviation			0h	16h	% of closure	Average of 3	St deviation
siCTR_1		0	100	100	0		siCTR_1		0	100	100	0		siCTR_1		0	100	100	0
siCTR_2		0	100				siCTR_2		0	100				siCTR_2		0	100
siCTR_3		0	100				siCTR_3		0	100				siCTR_3		0	100
siYap_1	0.00835156	0.00584963	29.9576	29.238	1.86871		siYap_1	0.00844698	0.00384679	54.4596	47.8592	5.88855		siYap_1	0.0206168	0.00659541	68.0095	64.5927	3.053
siYap_2	0.00873514	0.00636648	27.1165				siYap_2	0.00915929	0.00520757	43.1444				siYap_2	0.0198061	0.00720227	63.6361
siYap_3	0.00904618	0.00627444	30.6399				siYap_3	0.00903301	0.00488021	45.9736				siYap_3	0.0212247	0.00803722	62.1326
siTaz_1	0.00887405	0.00815414	8.11253	21.9294	13.1938		siTaz_1	0.00940977	0.00943981	-0.319243	2.79602	2.74683		siTaz_1	0.0207786	0.0145708	29.8761	30.409	0.753584
siTaz_2	0.00838172	0.00643049	23.2796				siTaz_2	0.00876219	0.00842594	3.83751				siTaz_2	contaminated
siTaz_3	0.0101807	0.00667891	34.3962				siTaz_3	0.00866483	0.00824287	4.8698				siTaz_3	0.0206958	0.0142922	30.9418
siYapTaz_1	0.0104545	0.00930055	11.0383	10.6746	5.16326		siYapTaz_1	0.00990736	0.0084233	14.9794	11.0481	5.93954		siYapTaz_1	contaminated			40.3231	15.5084
siYapTaz_2	0.0111151	0.0105217	5.33913				siYapTaz_2	0.00975819	0.00839698	13.9494				siYapTaz_2	0.020009	0.00974654	51.2892
siYapTaz_3	0.0107388	0.00905858	15.6464				siYapTaz_3	0.0100386	0.00961539	4.21554				siYapTaz_3	0.0218315	0.0154224	29.357
Measured in ImageJ							1	Filipa_SWA_13032017_siCTR_1_0h_ch00-1.tif	0.00892708					1	SWA_siYapTaz_03042017_siCTR_0h_1_ch00.tif	0.0194225
1	SWA_siYapTaz_31032017_siTaz_1_0h_4x_ch00-1.tif	0.00887405					2	Filipa_SWA_13032017_siCTR_2_0h_ch00-1.tif	0.0103644					2	SWA_siYapTaz_03042017_siCTR_0h_2_ch00.tif	0.0199651
2	SWA_siYapTaz_31032017_siTaz_1_16h_4x_ch00-1.tif	0.00815414					3	Filipa_SWA_13032017_siCTR_3_0h_ch00-1.tif	0.0088649					3	SWA_siYapTaz_03042017_siCTR_0h_3_ch00.tif	0.0202894
3	SWA_siYapTaz_31032017_siTaz_2_0h_4x_ch00-1.tif	0.00838172					4	Filipa_SWA_13032017_siYap_1_0h_ch00-1.tif	0.00844698					4	SWA_siYapTaz_03042017_siYap_0h_1_ch00.tif	0.0206168
4	SWA_siYapTaz_31032017_siTaz_2_16h_4x_ch00-1.tif	0.00643049					5	Filipa_SWA_13032017_siYap_2_0h_ch00-1.tif	0.00915929					5	SWA_siYapTaz_03042017_siYap_0h_2_ch00.tif	0.0198061
5	SWA_siYapTaz_31032017_siTaz_3_0h_4x_ch00-1.tif	0.0101807					6	Filipa_SWA_13032017_siYap_3_0h_ch00-1.tif	0.00903301					6	SWA_siYapTaz_03042017_siYap_0h_3_ch00.tif	0.0212247
6	SWA_siYapTaz_31032017_siTaz_3_16h_4x_ch00-1.tif	0.00667891					7	Filipa_SWA_13032017_siTaz_1_0h_ch00-1.tif	0.00940977					7	SWA_siYapTaz_03042017_siTaz_0h_1_ch00.tif	0.0207786
7	SWA_siYapTaz_31032017_siYap_1_0h_4x_ch00-1.tif	0.00835156					8	Filipa_SWA_13032017_siTaz_2_0h_ch00-1.tif	0.00876219					8	SWA_siYapTaz_03042017_siTaz_0h_3_ch00.tif	0.0206958
8	SWA_siYapTaz_31032017_siYap_1_16h_4x_ch00-1.tif	0.00584963					9	Filipa_SWA_13032017_siTaz_3_0h_ch00-1.tif	0.00866483					9	SWA_siYapTaz_03042017_siYapTaz_0h_2_ch00.tif	0.020009
9	SWA_siYapTaz_31032017_siYap_2_0h_4x_ch00-1.tif	0.00873514					10	Filipa_SWA_13032017_siYapTaz_1_0h_ch00-1.tif	0.00990736					10	SWA_siYapTaz_03042017_siYapTaz_0h_3_ch00.tif	0.0218315
10	SWA_siYapTaz_31032017_siYap_2_16h_4x_ch00-1.tif	0.00636648					11	Filipa_SWA_13032017_siYapTaz_2_0h_ch00-1.tif	0.00975819					11	SWA_siYapTaz_03042017_siYap_16h_1_ch00.tif	0.00659541
11	SWA_siYapTaz_31032017_siYap_3_0h_4x_ch00-1.tif	0.00904618					12	Filipa_SWA_13032017_siYapTaz_3_0h_ch00-1.tif	0.0100386					12	SWA_siYapTaz_03042017_siYap_16h_2_ch00.tif	0.00720227
12	SWA_siYapTaz_31032017_siYap_3_16h_4x_ch00-1.tif	0.00627444					13	Filipa_SWA_13032017_siYap_1_16h_4X_ch00-1.tif	0.00384679					13	SWA_siYapTaz_03042017_siYap_16h_3_ch00.tif	0.00803722
13	SWA_siYapTaz_31032017_siYapTaz_1_0h_4x_ch00-1.tif	0.0104545					14	Filipa_SWA_13032017_siYap_2_16h_4x_ch00-1.tif	0.00520757					14	SWA_siYapTaz_03042017_siTaz_16h_1_ch00.tif	0.0145708
14	SWA_siYapTaz_31032017_siYapTaz_1_16h_4x_ch00-1.tif	0.00930055					15	Filipa_SWA_13032017_siYap_3_16h_4x_ch00-1.tif	0.00488021					15	SWA_siYapTaz_03042017_siTaz_16h_3_ch00.tif	0.0142922
15	SWA_siYapTaz_31032017_siYapTaz_2_0h_4x_ch00-1.tif	0.0111151					16	Filipa_SWA_13032017_siTaz_1_16h_4x_ch00-1.tif	0.00943981					16	SWA_siYapTaz_03042017_siYapTaz_16h_2_ch00.tif	0.00974654
16	SWA_siYapTaz_31032017_siYapTaz_2_16h_4x_ch00-1.tif	0.0105217					17	Filipa_SWA_13032017_siTaz_2_16h_4x_ch00-1.tif	0.00842594					17	SWA_siYapTaz_03042017_siYapTaz_16h_3_ch00.tif	0.0154224
17	SWA_siYapTaz_31032017_siYapTaz_3_0h_4x_ch00-1.tif	0.0107388					18	Filipa_SWA_13032017_siTaz_3_16h_4x_ch00-1.tif	0.00824287
18	SWA_siYapTaz_31032017_siYapTaz_3_16h_4x_ch00-1.tif	0.00905858					19	Filipa_SWA_13032017_siYapTaz_1_16h_4x_ch00-1.tif	0.0084233
							20	Filipa_SWA_13032017_siYapTaz_2_16h_4x_ch00-1.tif	0.00839698
							21	Filipa_SWA_13032017_siYapTaz_3_16h_4x_ch00-1.tif	0.00961539
