# Supplementary material for: YAP and TAZ regulate adherens junction dynamics and endothelial cell distribution during vascular development
Source: eLife. 2018 Feb 5;7:e31037. doi: 10.7554/eLife.31037 (PMC5814147; doi:10.7554/eLife.31037)
Supplement: Figure 7—source data 1. — RT-PCR values of YAP and TAZ gain of function (Figure 7E) and loss of function (Figure 7F) HUVECs for Notch and BMP genes. Values for quantification of pSMAD1/5/8 staining in P6 retinas of YapTaz iEC-KO (Figure 7K). [file elife-31037-fig7-data1.xls]

## Sheet: Figure 7C, D
Figure 7C - Quantification of number of sprouts per 100 um of sprouting front extension at P6 in Taz iEC-GOF mice
	# sprouts per 1000uM			# sprouts per 100uM
	Ctrl	Taz iEC-GOF		Ctrl	Taz iEC-GOF
	29.21	37.25		2.921	3.725
	24.27	30.75		2.427	3.075
	29.69	36.68		2.969	3.668
	31.78	36.28		3.178	3.628
	29.94	44.8		2.994	4.48
	34.2	39.69		3.42	3.969
n animals	6	6
Figure 7D - Quantification of branching frequency (i.e. number of branching points per field of view) in Taz iEC-GOF mice
	# branchpoints
	Ctrl	Taz iEC-GOF
	32.75	35.75
	31.57	40.57
	30.38	35.875
	32.63	39.13
	30.57	40
	30.17	32.63
n animals	6	6

## Sheet: Figure 7E
Block Type	96well
Chemistry	TAQMAN
Experiment File Name	D:\Applied Biosystems\StepOne Software v2.3\experiments\YT 0612 - Notch validation.eds
Experiment Run End Time	2017-05-10 20:30:57 PM CEST
Instrument Type	steponeplus
Passive Reference	ROX
Figure 7E - Reverse transcriptase PCR of HUVECs transduced with adenoviruses carrying YAP (AdYAP) and TAZ (AdTAZ) constitutively active forms and control
HES1
Run 1						Run 2						Run 3
Sample Name	Target Name	RQ	Cт	ΔCт		Sample Name	Target Name	RQ	Cт	ΔCт		Sample Name	Target Name	RQ	Cт	ΔCт
AdGFP1	hHES1	1	23.6941	5.61342		AdGFP1	hHES1	1	23.3426	8.81226		AdGFP1	hHES1	1	21.2764	6.5104
AdGFP1	hACTIN		18.0807			AdGFP1	hACTIN		14.5303			AdGFP1	hACTIN		14.766
AdGFP1	hHES1	1	23.5788	5.84228		AdGFP1	hHES1	1	23.2907	8.9846		AdGFP1	hHES1	1	21.207	6.83763
AdGFP1	hACTIN		17.7365			AdGFP1	hACTIN		14.3061			AdGFP1	hACTIN		14.3694
AdGFP1	hHES1	1	23.6825	5.61555		AdGFP1	hHES1	1	23.2519	8.63731		AdGFP1	hHES1	1	21.0566	6.40518
AdGFP1	hACTIN		18.0669			AdGFP1	hACTIN		14.6146			AdGFP1	hACTIN		14.6515
AdGFP2	hHES1	1.00598	22.8549	5.59236		AdGFP2	hHES1	0.781412	23.5709	9.09593		AdGFP2	hHES1	0.918968	20.775	6.91375
AdGFP2	hACTIN		17.2625			AdGFP2	hACTIN		14.475			AdGFP2	hACTIN		13.8613
AdGFP2	hHES1	1.00598	22.8075	5.6031		AdGFP2	hHES1	0.781412	23.6145	9.17712		AdGFP2	hHES1	0.918968	20.7722	6.68835
AdGFP2	hACTIN		17.2044			AdGFP2	hACTIN		14.4374			AdGFP2	hACTIN		14.0839
AdGFP2	hHES1	1.00598	22.7606	5.84998		AdGFP2	hHES1	0.781412	23.5259	9.22866		AdGFP2	hHES1	0.918968	20.755	6.51685
AdGFP2	hACTIN		16.9106			AdGFP2	hACTIN		14.2972			AdGFP2	hACTIN		14.2381
AdYAP1	hHES1	0.484325	23.6512	6.85066		AdYAP1	hHES1	0.446956	23.87	9.71428		AdYAP1	hHES1	0.456518	21.1375	7.46261
AdYAP1	hACTIN		16.8005			AdYAP1	hACTIN		14.1558			AdYAP1	hACTIN		13.6749
AdYAP1	hHES1	0.484325	23.5573	6.54275		AdYAP1	hHES1	0.446956	23.9669	10.0167		AdYAP1	hHES1	0.456518	21.3286	8.00913
AdYAP1	hACTIN		17.0146			AdYAP1	hACTIN		13.9501			AdYAP1	hACTIN		13.3194
AdYAP1	hHES1	0.484325	23.6128	6.81568		AdYAP1	hHES1	0.446956	24.1214	10.1886		AdYAP1	hHES1	0.456518	21.158	7.67524
AdYAP1	hACTIN		16.7971			AdYAP1	hACTIN		13.9329			AdYAP1	hACTIN		13.4827
AdYAP2	hHES1	0.507355	23.7169	7.12518		AdYAP2	hHES1	0.37193	23.9241	10.1372		AdYAP2	hHES1	0.336971	21.4431	8.62256
AdYAP2	hACTIN		16.5917			AdYAP2	hACTIN		13.7869			AdYAP2	hACTIN		12.8206
AdYAP2	hHES1	0.507355	23.4492	6.37116		AdYAP2	hHES1	0.37193	23.8602	10.1825		AdYAP2	hHES1	0.336971	21.5142	7.90605
AdYAP2	hACTIN		17.0781			AdYAP2	hACTIN		13.6777			AdYAP2	hACTIN		13.6081
AdYAP2	hHES1	0.507355	23.7836	6.5117		AdYAP2	hHES1	0.37193	24.0855	10.3952		AdYAP2	hHES1	0.336971	21.5262	7.93251
AdYAP2	hACTIN		17.2719			AdYAP2	hACTIN		13.6903			AdYAP2	hACTIN		13.5937
AdTAZ1	hHES1	0.467881	24.5213	6.34251		AdTAZ1	hHES1	0.436629	25.5244	9.94566		AdTAZ1	hHES1	0.248076	22.3996	8.43337
AdTAZ1	hACTIN		18.1788			AdTAZ1	hACTIN		15.5788			AdTAZ1	hACTIN		13.9662
AdTAZ1	hHES1	0.467881	24.721	7.27412		AdTAZ1	hHES1	0.436629	25.294	9.98416		AdTAZ1	hHES1	0.248076	22.3709	8.76429
AdTAZ1	hACTIN		17.4469			AdTAZ1	hACTIN		15.3098			AdTAZ1	hACTIN		13.6066
AdTAZ1	hHES1	0.467881	24.5234	6.74196		AdTAZ1	hHES1	0.436629	25.5429	10.0909		AdTAZ1	hHES1	0.248076	22.3731	8.58898
AdTAZ1	hACTIN		17.7814			AdTAZ1	hACTIN		15.452			AdTAZ1	hACTIN		13.7842
AdTAZ2	hHES1	0.509408	23.9771	6.54241		AdTAZ2	hHES1	0.484411	24.9391	9.60067		AdTAZ2	hHES1	0.224089	22.0572	8.48668
AdTAZ2	hACTIN		17.4347			AdTAZ2	hACTIN		15.3384			AdTAZ2	hACTIN		13.5706
AdTAZ2	hHES1	0.509408	23.7898	6.7367		AdTAZ2	hHES1	0.484411	24.9641	10.016		AdTAZ2	hHES1	0.224089	22.1032	8.88524
AdTAZ2	hACTIN		17.0531			AdTAZ2	hACTIN		14.9481			AdTAZ2	hACTIN		13.2179
AdTAZ2	hHES1	0.509408	23.7252	6.71146		AdTAZ2	hHES1	0.484411	24.9228	9.95456		AdTAZ2	hHES1	0.224089	22.1041	8.85486
AdTAZ2	hACTIN		17.0137			AdTAZ2	hACTIN		14.9682			AdTAZ2	hACTIN		13.2492
HEY1
Run 1						Run 2						Run 3
Sample Name	Target Name	RQ	Cт	ΔCт		Sample Name	Target Name	RQ	Cт	ΔCт		Sample Name	Target Name	RQ	Cт	ΔCт
AdGFP1	hHEY1	1	25.9611	6.42159		AdGFP1	hHEY1	1	25.8704	11.3542		AdGFP1	hHEY1	1	25.8714	11.1838
AdGFP1	hACTIN		19.5395			AdGFP1	hACTIN		14.5163			AdGFP1	hACTIN		14.6876
AdGFP1	hHEY1	1	24.9265	7.24016		AdGFP1	hHEY1	1	25.8608	11.4972		AdGFP1	hHEY1	1	25.7426	11.1915
AdGFP1	hACTIN		17.6863			AdGFP1	hACTIN		14.3636			AdGFP1	hACTIN		14.5511
AdGFP1	hHEY1	1	25.0473	6.8966		AdGFP1	hHEY1	1	25.8346	11.3297		AdGFP1	hHEY1	1	25.8446	11.3209
AdGFP1	hACTIN		18.1507			AdGFP1	hACTIN		14.5049			AdGFP1	hACTIN		14.5237
AdGFP2	hHEY1	0.729765	24.4815	6.85101		AdGFP2	hHEY1	0.952796	25.9488	11.1678		AdGFP2	hHEY1	0.896569	25.625	11.0511
AdGFP2	hACTIN		17.6304			AdGFP2	hACTIN		14.781			AdGFP2	hACTIN		14.5739
AdGFP2	hHEY1	0.729765	24.4146	7.56324		AdGFP2	hHEY1	0.952796	25.9467	11.5501		AdGFP2	hHEY1	0.896569	25.4639	11.5784
AdGFP2	hACTIN		16.8514			AdGFP2	hACTIN		14.3966			AdGFP2	hACTIN		13.8856
AdGFP2	hHEY1	0.729765	24.3487	7.5076		AdGFP2	hHEY1	0.952796	25.9822	11.6725		AdGFP2	hHEY1	0.896569	25.5772	11.5392
AdGFP2	hACTIN		16.8411			AdGFP2	hACTIN		14.3097			AdGFP2	hACTIN		14.0379
AdYAP1	hHEY1	0.0770727	27.409	10.2107		AdYAP1	hHEY1	0.300176	27.1133	13.0165		AdYAP1	hHEY1	0.197044	26.9687	13.2581
AdYAP1	hACTIN		17.1983			AdYAP1	hACTIN		14.0968			AdYAP1	hACTIN		13.7106
AdYAP1	hHEY1	0.0770727	27.4129	10.43		AdYAP1	hHEY1	0.300176	27.1829	13.0959		AdYAP1	hHEY1	0.197044	26.9634	13.868
AdYAP1	hACTIN		16.983			AdYAP1	hACTIN		14.087			AdYAP1	hACTIN		13.0954
AdYAP1	hHEY1	0.0770727	27.6467	11.0106		AdYAP1	hHEY1	0.300176	27.2531	13.2771		AdYAP1	hHEY1	0.197044	26.7701	13.6003
AdYAP1	hACTIN		16.6361			AdYAP1	hACTIN		13.976			AdYAP1	hACTIN		13.1698
AdYAP2	hHEY1	0.0898486	27.3413	10.5951		AdYAP2	hHEY1	0.291804	27.1045	13.1796		AdYAP2	hHEY1	0.13828	27.6168	14.1514
AdYAP2	hACTIN		16.7462			AdYAP2	hACTIN		13.9249			AdYAP2	hACTIN		13.4654
AdYAP2	hHEY1	0.0898486	27.2967	10.4282		AdYAP2	hHEY1	0.291804	27.1843	13.1983		AdYAP2	hHEY1	0.13828	27.3372	14.2511
AdYAP2	hACTIN		16.8685			AdYAP2	hACTIN		13.986			AdYAP2	hACTIN		13.0861
AdYAP2	hHEY1	0.0898486	27.3997	9.96418		AdYAP2	hHEY1	0.291804	27.2183	13.1341		AdYAP2	hHEY1	0.13828	27.6992	13.8566
AdYAP2	hACTIN		17.4356			AdYAP2	hACTIN		14.0843			AdYAP2	hACTIN		13.8425
AdTAZ1	hHEY1	0.144453	28.7342	9.5552		AdTAZ1	hHEY1	0.180855	29.449	13.9533		AdTAZ1	hHEY1	0.0829915	28.7599	15.1104
AdTAZ1	hACTIN		19.179			AdTAZ1	hACTIN		15.4958			AdTAZ1	hACTIN		13.6495
AdTAZ1	hHEY1	0.144453	27.9721	10.1036		AdTAZ1	hHEY1	0.180855	29.1902	13.7913		AdTAZ1	hHEY1	0.0829915	28.7674	14.7117
AdTAZ1	hACTIN		17.8685			AdTAZ1	hACTIN		15.3988			AdTAZ1	hACTIN		14.0556
AdTAZ1	hHEY1	0.144453	28.6525	9.27354		AdTAZ1	hHEY1	0.180855	29.5101	13.8378		AdTAZ1	hHEY1	0.0829915	28.8104	14.6467
AdTAZ1	hACTIN		19.3789			AdTAZ1	hACTIN		15.6723			AdTAZ1	hACTIN		14.1637
AdTAZ2	hHEY1	0.0879864	27.641	10.0626		AdTAZ2	hHEY1	0.468915	27.7984	12.1631		AdTAZ2	hHEY1	0.0813859	28.5546	14.9477
AdTAZ2	hACTIN		17.5785			AdTAZ2	hACTIN		15.6352			AdTAZ2	hACTIN		13.6069
AdTAZ2	hHEY1	0.0879864	27.3365	10.3619		AdTAZ2	hHEY1	0.468915	27.7249	12.6077		AdTAZ2	hHEY1	0.0813859	28.6416	14.8525
AdTAZ2	hACTIN		16.9746			AdTAZ2	hACTIN		15.1172			AdTAZ2	hACTIN		13.789
AdTAZ2	hHEY1	0.0879864	27.6217	10.6536		AdTAZ2	hHEY1	0.468915	27.8373	12.6881		AdTAZ2	hHEY1	0.0813859	28.493	14.7532
AdTAZ2	hACTIN		16.9681			AdTAZ2	hACTIN		15.1492			AdTAZ2	hACTIN		13.7398
NRARP
Run 1						Run 2						Run 3
Sample Name	Target Name	RQ	Cт	ΔCт		Sample Name	Target Name	RQ	Cт	ΔCт		Sample Name	Target Name	RQ	Cт	ΔCт
AdGFP1	hNRAP	1	24.3035	5.32103		AdGFP1	hNRAP	1	24.2689	9.26495		AdGFP1	hNRAP	1	17.669	2.44214
AdGFP1	hACTIN		18.9824			AdGFP1	hACTIN		15.004			AdGFP1	hACTIN		15.2268
AdGFP1	hNRAP	1	24.2575	5.63083		AdGFP1	hNRAP	1	24.2048	9.2844		AdGFP1	hNRAP	1	17.3886	2.83161
AdGFP1	hACTIN		18.6266			AdGFP1	hACTIN		14.9204			AdGFP1	hACTIN		14.557
AdGFP1	hNRAP	1	24.3153	5.35639		AdGFP1	hNRAP	1	24.1248	9.07386		AdGFP1	hNRAP	1	17.6808	2.54004
AdGFP1	hACTIN		18.9589			AdGFP1	hACTIN		15.0509			AdGFP1	hACTIN		15.1408
AdGFP2	hNRAP	1.46665	23.2327	5.1287		AdGFP2	hNRAP	0.79894	24.4134	9.2049		AdGFP2	hNRAP	1.06956	17.1023	2.5604
AdGFP2	hACTIN		18.104			AdGFP2	hACTIN		15.2085			AdGFP2	hACTIN		14.5419
AdGFP2	hNRAP	1.46665	23.2944	3.89744		AdGFP2	hNRAP	0.79894	24.436	9.76214		AdGFP2	hNRAP	1.06956	17.106	2.80858
AdGFP2	hACTIN		19.397			AdGFP2	hACTIN		14.6739			AdGFP2	hACTIN		14.2974
AdGFP2	hNRAP	1.46665	23.144	5.62455		AdGFP2	hNRAP	0.79894	24.3556	9.6277		AdGFP2	hNRAP	1.06956	16.797	2.15375
AdGFP2	hACTIN		17.5194			AdGFP2	hACTIN		14.7279			AdGFP2	hACTIN		14.6433
AdYAP1	hNRAP	0.713492	23.557	5.93928		AdYAP1	hNRAP	0.926223	23.9676	9.43016		AdYAP1	hNRAP	0.928584	16.593	2.90066
AdYAP1	hACTIN		17.6178			AdYAP1	hACTIN		14.5374			AdYAP1	hACTIN		13.6923
AdYAP1	hNRAP	0.713492	23.5213	5.85385		AdYAP1	hNRAP	0.926223	23.8715	9.31209		AdYAP1	hNRAP	0.928584	16.3747	2.52665
AdYAP1	hACTIN		17.6675			AdYAP1	hACTIN		14.5594			AdYAP1	hACTIN		13.848
AdYAP1	hNRAP	0.713492	23.5287	5.97622		AdYAP1	hNRAP	0.926223	23.8699	9.21266		AdYAP1	hNRAP	0.928584	16.4536	2.70717
AdYAP1	hACTIN		17.5525			AdYAP1	hACTIN		14.6572			AdYAP1	hACTIN		13.7464
AdYAP2	hNRAP	0.664402	23.5836	6.03154		AdYAP2	hNRAP	1.17608	23.5214	9.03399		AdYAP2	hNRAP	0.953003	16.2818	2.78864
AdYAP2	hACTIN		17.552			AdYAP2	hACTIN		14.4874			AdYAP2	hACTIN		13.4931
AdYAP2	hNRAP	0.664402	23.5934	6.09303		AdYAP2	hNRAP	1.17608	23.4512	8.9117		AdYAP2	hNRAP	0.953003	16.3227	2.52003
AdYAP2	hACTIN		17.5004			AdYAP2	hACTIN		14.5395			AdYAP2	hACTIN		13.8027
AdYAP2	hNRAP	0.664402	23.7705	5.9533		AdYAP2	hNRAP	1.17608	23.637	8.97556		AdYAP2	hNRAP	0.953003	17.0396	2.71347
AdYAP2	hACTIN		17.8172			AdYAP2	hACTIN		14.6614			AdYAP2	hACTIN		14.3261
AdTAZ1	hNRAP	1.07199	24.6697	4.69563		AdTAZ1	hNRAP	1.01499	25.5891	8.73693		AdTAZ1	hNRAP	0.853354	18.231	2.36899
AdTAZ1	hACTIN		19.9741			AdTAZ1	hACTIN		16.8522			AdTAZ1	hACTIN		15.8621
AdTAZ1	hNRAP	1.07199	24.447	5.89775		AdTAZ1	hNRAP	1.01499	25.5471	9.49666		AdTAZ1	hNRAP	0.853354	17.8071	2.82775
AdTAZ1	hACTIN		18.5492			AdTAZ1	hACTIN		16.0504			AdTAZ1	hACTIN		14.9794
AdTAZ1	hNRAP	1.07199	24.659	5.414		AdTAZ1	hNRAP	1.01499	25.5565	9.32524		AdTAZ1	hNRAP	0.853354	17.9743	3.30341
AdTAZ1	hACTIN		19.245			AdTAZ1	hACTIN		16.2313			AdTAZ1	hACTIN		14.6709
AdTAZ2	hNRAP	0.90468	23.9763	5.00544		AdTAZ2	hNRAP	0.710051	25.3316	9.4296		AdTAZ2	hNRAP	0.792503	17.4161	3.03146
AdTAZ2	hACTIN		18.9708			AdTAZ2	hACTIN		15.902			AdTAZ2	hACTIN		14.3846
AdTAZ2	hNRAP	0.90468	23.6154	5.61642		AdTAZ2	hNRAP	0.710051	25.3237	9.91265		AdTAZ2	hNRAP	0.792503	17.0138	2.83116
AdTAZ2	hACTIN		17.999			AdTAZ2	hACTIN		15.4111			AdTAZ2	hACTIN		14.1826
AdTAZ2	hNRAP	0.90468	23.7921	6.11996		AdTAZ2	hNRAP	0.710051	25.3568	9.76298		AdTAZ2	hNRAP	0.792503	17.1203	2.95772
AdTAZ2	hACTIN		17.6721			AdTAZ2	hACTIN		15.5939			AdTAZ2	hACTIN		14.1625
Dll4
Run 1						Run 2						Run 3
Sample Name	Target Name	RQ	Cт	ΔCт		Sample Name	Target Name	RQ	Cт	ΔCт		Sample Name	Target Name	RQ	Cт	ΔCт
AdGFP1	hDLL4	1	23.9632	2.35499		AdGFP1	hDLL4	1	24.3818	8.46976		AdGFP1	hDLL4	1	24.3483	7.5264
AdGFP1	hACTIN		21.6082			AdGFP1	hACTIN		15.912			AdGFP1	hACTIN		16.8219
AdGFP1	hDLL4	1	23.8345	3.6366		AdGFP1	hDLL4	1	24.5258	9.37844		AdGFP1	hDLL4	1	24.267	8.98782
AdGFP1	hACTIN		20.1979			AdGFP1	hACTIN		15.1473			AdGFP1	hACTIN		15.2792
AdGFP1	hDLL4	1	23.7954	3.92546		AdGFP1	hDLL4	1	24.4363	9.3322		AdGFP1	hDLL4	1	24.1677	9.25894
AdGFP1	hACTIN		19.87			AdGFP1	hACTIN		15.1041			AdGFP1	hACTIN		14.9088
AdGFP2	hDLL4	0.559586	22.8125	3.41138		AdGFP2	hDLL4	0.597855	24.5873	9.11305		AdGFP2	hDLL4	1.42757	23.2441	7.27784
AdGFP2	hACTIN		19.4011			AdGFP2	hACTIN		15.4743			AdGFP2	hACTIN		15.9662
AdGFP2	hDLL4	0.559586	22.8672	4.86706		AdGFP2	hDLL4	0.597855	24.7773	9.98348		AdGFP2	hDLL4	1.42757	23.5537	8.18938
AdGFP2	hACTIN		18.0001			AdGFP2	hACTIN		14.7938			AdGFP2	hACTIN		15.3644
AdGFP2	hDLL4	0.559586	22.8014	4.15132		AdGFP2	hDLL4	0.597855	24.921	10.3103		AdGFP2	hDLL4	1.42757	23.5588	8.76526
AdGFP2	hACTIN		18.6501			AdGFP2	hACTIN		14.6107			AdGFP2	hACTIN		14.7935
AdYAP1	hDLL4	0.108946	24.8018	6.56513		AdYAP1	hDLL4	0.375988	24.8637	10.3037		AdYAP1	hDLL4	0.355063	24.5766	9.88953
AdYAP1	hACTIN		18.2366			AdYAP1	hACTIN		14.5599			AdYAP1	hACTIN		14.6871
AdYAP1	hDLL4	0.108946	24.7923	6.03512		AdYAP1	hDLL4	0.375988	24.9572	10.5768		AdYAP1	hDLL4	0.355063	24.7305	9.78372
AdYAP1	hACTIN		18.7572			AdYAP1	hACTIN		14.3804			AdYAP1	hACTIN		14.9468
AdYAP1	hDLL4	0.108946	24.775	6.91175		AdYAP1	hDLL4	0.375988	24.9868	10.5336		AdYAP1	hDLL4	0.355063	24.6653	10.5815
AdYAP1	hACTIN		17.8633			AdYAP1	hACTIN		14.4532			AdYAP1	hACTIN		14.0838
AdYAP2	hDLL4	0.204564	24.5409	6.50168		AdYAP2	hDLL4	0.410953	24.6966	10.5529		AdYAP2	hDLL4	0.322455	25.3745	10.5637
AdYAP2	hACTIN		18.0392			AdYAP2	hACTIN		14.1437			AdYAP2	hACTIN		14.8109
AdYAP2	hDLL4	0.204564	24.8044	4.99451		AdYAP2	hDLL4	0.410953	24.8211	10.5095		AdYAP2	hDLL4	0.322455	25.3535	10.7125
AdYAP2	hACTIN		19.8099			AdYAP2	hACTIN		14.3117			AdYAP2	hACTIN		14.641
AdYAP2	hDLL4	0.204564	25.0011	5.28897		AdYAP2	hDLL4	0.410953	24.8462	9.96688		AdYAP2	hDLL4	0.322455	25.8457	9.39555
AdYAP2	hACTIN		19.7121			AdYAP2	hACTIN		14.8793			AdYAP2	hACTIN		16.4502
AdTAZ1	hDLL4	0.0670004	25.4601	7.30295		AdTAZ1	hDLL4	0.280438	26.4133	10.8647		AdTAZ1	hDLL4	0.091484	26.4346	12.0458
AdTAZ1	hACTIN		18.1572			AdTAZ1	hACTIN		15.5486			AdTAZ1	hACTIN		14.3888
AdTAZ1	hDLL4	0.0670004	25.6716	7.40095		AdTAZ1	hDLL4	0.280438	26.6129	10.7901		AdTAZ1	hDLL4	0.091484	26.7133	11.904
AdTAZ1	hACTIN		18.2707			AdTAZ1	hACTIN		15.8229			AdTAZ1	hACTIN		14.8093
AdTAZ1	hDLL4	0.0670004	25.5909	6.9122		AdTAZ1	hDLL4	0.280438	26.7124	11.0284		AdTAZ1	hDLL4	0.091484	26.4083	12.1744
AdTAZ1	hACTIN		18.6787			AdTAZ1	hACTIN		15.684			AdTAZ1	hACTIN		14.2339
AdTAZ2	hDLL4	0.0704894	24.9182	6.71273		AdTAZ2	hDLL4	0.370743	25.7939	10.1936		AdTAZ2	hDLL4	0.102807	25.7838	11.5072
AdTAZ2	hACTIN		18.2055			AdTAZ2	hACTIN		15.6003			AdTAZ2	hACTIN		14.2766
AdTAZ2	hDLL4	0.0704894	24.9273	7.44935		AdTAZ2	hDLL4	0.370743	25.9274	10.9618		AdTAZ2	hDLL4	0.102807	25.9531	11.9307
AdTAZ2	hACTIN		17.4779			AdTAZ2	hACTIN		14.9656			AdTAZ2	hACTIN		14.0224
AdTAZ2	hDLL4	0.0704894	24.9799	7.23432		AdTAZ2	hDLL4	0.370743	25.9391	10.3195		AdTAZ2	hDLL4	0.102807	25.982	12.1812
AdTAZ2	hACTIN		17.7455			AdTAZ2	hACTIN		15.6196			AdTAZ2	hACTIN		13.8007
LNFG
Run 1						Run 2						Run 3
Sample Name	Target Name	RQ	Cт	ΔCт		Sample Name	Target Name	RQ	Cт	ΔCт		Sample Name	Target Name	RQ	Cт	ΔCт
AdGFP1	hLFNG	1	26.9718	11.2688		AdGFP1	hLFNG	1	26.6475	11.2251		AdGFP1	hLFNG	1	26.9667	9.60082
AdGFP1	hACTIN		15.7029			AdGFP1	hACTIN		15.4224			AdGFP1	hACTIN		17.3979
AdGFP1	hLFNG	1	26.8641	11.4119		AdGFP1	hLFNG	1	26.5764	11.4334		AdGFP1	hLFNG	1	26.8118	9.60082
AdGFP1	hACTIN		15.4522			AdGFP1	hACTIN		15.143			AdGFP1	hACTIN		17.0333
AdGFP1	hLFNG	1	26.8387	11.1291		AdGFP1	hLFNG	1	26.5881	11.2808		AdGFP1	hLFNG	1	26.8442	9.60082
AdGFP1	hACTIN		15.7096			AdGFP1	hACTIN		15.3073			AdGFP1	hACTIN		17.3889
AdGFP2	hLFNG	0.79531	26.1941	11.3256		AdGFP2	hLFNG	0.812558	26.9674	11.4822		AdGFP2	hLFNG	0.838358	26.7194	9.85518
AdGFP2	hACTIN		14.8685			AdGFP2	hACTIN		15.4852			AdGFP2	hACTIN		16.9472
AdGFP2	hLFNG	0.79531	26.2066	11.6645		AdGFP2	hLFNG	0.812558	26.8725	11.6981		AdGFP2	hLFNG	0.838358	26.7337	9.85518
AdGFP2	hACTIN		14.5421			AdGFP2	hACTIN		15.1745			AdGFP2	hACTIN		16.8909
AdGFP2	hLFNG	0.79531	26.2077	11.811		AdGFP2	hLFNG	0.812558	26.9748	11.6574		AdGFP2	hLFNG	0.838358	26.6402	9.85518
AdGFP2	hACTIN		14.3967			AdGFP2	hACTIN		15.3173			AdGFP2	hACTIN		16.6897
AdYAP1	hLFNG	0.0962792	29.1711	14.8945		AdYAP1	hLFNG	0.22882	28.1983	13.2826		AdYAP1	hLFNG	0.104737	28.9648	12.856
AdYAP1	hACTIN		14.2766			AdYAP1	hACTIN		14.9157			AdYAP1	hACTIN		16.1091
AdYAP1	hLFNG	0.0962792	28.9839	14.6072		AdYAP1	hLFNG	0.22882	28.3078	13.6332		AdYAP1	hLFNG	0.104737	28.9858	12.856
AdYAP1	hACTIN		14.3767			AdYAP1	hACTIN		14.6746			AdYAP1	hACTIN		16.1167
AdYAP1	hLFNG	0.0962792	28.9008	14.438		AdYAP1	hLFNG	0.22882	28.237	13.4067		AdYAP1	hLFNG	0.104737	29.0318	12.856
AdYAP1	hACTIN		14.4628			AdYAP1	hACTIN		14.8304			AdYAP1	hACTIN		16.1887
AdYAP2	hLFNG	0.12483	28.7878	14.3317		AdYAP2	hLFNG	0.203143	29.6671	13.4984		AdYAP2	hLFNG	0.0839114	29.2874	13.1758
AdYAP2	hACTIN		14.4561			AdYAP2	hACTIN		16.1686			AdYAP2	hACTIN		16.1145
AdYAP2	hLFNG	0.12483	28.9982	14.3017		AdYAP2	hLFNG	0.203143	29.5951	13.7437		AdYAP2	hLFNG	0.0839114	29.6154	13.1758
AdYAP2	hACTIN		14.6965			AdYAP2	hACTIN		15.8514			AdYAP2	hACTIN		16.3791
AdYAP2	hLFNG	0.12483	28.9678	14.1822		AdYAP2	hLFNG	0.203143	29.6284	13.5955		AdYAP2	hLFNG	0.0839114	29.3304	13.1758
AdYAP2	hACTIN		14.7856			AdYAP2	hACTIN		16.0329			AdYAP2	hACTIN		16.2122
AdTAZ1	hLFNG	0.27531	28.5258	13.0525		AdTAZ1	hLFNG	0.458299	28.8595	12.4155		AdTAZ1	hLFNG	0.146459	29.2315	12.3722
AdTAZ1	hACTIN		15.4733			AdTAZ1	hACTIN		16.444			AdTAZ1	hACTIN		16.8021
AdTAZ1	hLFNG	0.27531	28.4164	13.1515		AdTAZ1	hLFNG	0.458299	28.8024	12.5066		AdTAZ1	hLFNG	0.146459	29.1309	12.3722
AdTAZ1	hACTIN		15.2648			AdTAZ1	hACTIN		16.2958			AdTAZ1	hACTIN		16.6464
AdTAZ1	hLFNG	0.27531	28.5495	13.1884		AdTAZ1	hLFNG	0.458299	28.7005	12.3942		AdTAZ1	hLFNG	0.146459	29.1717	12.3722
AdTAZ1	hACTIN		15.361			AdTAZ1	hACTIN		16.3063			AdTAZ1	hACTIN		16.9688
AdTAZ2	hLFNG	0.25485	27.8544	12.857		AdTAZ2	hLFNG	0.275017	27.8111	13.1979		AdTAZ2	hLFNG	0.179287	28.5	12.0805
AdTAZ2	hACTIN		14.9974			AdTAZ2	hACTIN		14.6132			AdTAZ2	hACTIN		16.6724
AdTAZ2	hLFNG	0.25485	27.8238	13.594		AdTAZ2	hLFNG	0.275017	27.8608	13.2049		AdTAZ2	hLFNG	0.179287	28.3396	12.0805
AdTAZ2	hACTIN		14.2298			AdTAZ2	hACTIN		14.6559			AdTAZ2	hACTIN		16.0821
AdTAZ2	hLFNG	0.25485	27.956	13.2757		AdTAZ2	hLFNG	0.275017	28.0248	13.1237		AdTAZ2	hLFNG	0.179287	28.5064	12.0805
AdTAZ2	hACTIN		14.6803			AdTAZ2	hACTIN		14.9011			AdTAZ2	hACTIN		16.35
ANKRD1
Run 1						Run 2						Run 3
Sample Name	Target Name	RQ	Cт	ΔCт		Sample Name	Target Name	RQ	Cт	ΔCт		Sample Name	Target Name	RQ	Cт	ΔCт
AdGFP1	hANKRD1	1	23.5116	6.95875		AdGFP1	hANKRD1	1	21.9258	5.94477		AdGFP1	hANKRD1	1	24.3665	9.80833
AdGFP1	hACTIN		16.5529			AdGFP1	hACTIN		15.981			AdGFP1	hACTIN		14.5582
AdGFP1	hANKRD1	1	23.0882	7.35233		AdGFP1	hANKRD1	1	21.7234	7.24735		AdGFP1	hANKRD1	1	24.2163	9.96243
AdGFP1	hACTIN		15.7359			AdGFP1	hACTIN		14.476			AdGFP1	hACTIN		14.2539
AdGFP1	hANKRD1	1	23.0979	7.39015		AdGFP1	hANKRD1	1	21.6248	6.75566		AdGFP1	hANKRD1	1	24.0937	10.1754
AdGFP1	hACTIN		15.7078			AdGFP1	hACTIN		14.8691			AdGFP1	hACTIN		13.9183
AdGFP2	hANKRD1	1.80076	21.9771	6.0344		AdGFP2	hANKRD1	0.708121	21.6003	6.75812		AdGFP2	hANKRD1	1.25378	23.2371	9.41707
AdGFP2	hACTIN		15.9427			AdGFP2	hACTIN		14.8422			AdGFP2	hACTIN		13.8201
AdGFP2	hANKRD1	1.80076	22.7451	6.50619		AdGFP2	hANKRD1	0.708121	21.6096	7.13465		AdGFP2	hANKRD1	1.25378	23.1113	9.59968
AdGFP2	hACTIN		16.2389			AdGFP2	hACTIN		14.4749			AdGFP2	hACTIN		13.5116
AdGFP2	hANKRD1	1.80076	22.4195	6.61482		AdGFP2	hANKRD1	0.708121	21.9161	7.5488		AdGFP2	hANKRD1	1.25378	23.1466	9.9506
AdGFP2	hACTIN		15.8047			AdGFP2	hACTIN		14.3673			AdGFP2	hACTIN		13.196
AdYAP1	hANKRD1	6.94456	18.4151	3.96703		AdYAP1	hANKRD1	1.85718	20.0475	5.28137		AdYAP1	hANKRD1	7.50147	20.0826	7.10732
AdYAP1	hACTIN		14.4481			AdYAP1	hACTIN		14.7661			AdYAP1	hACTIN		12.9753
AdYAP1	hANKRD1	6.94456	18.8692	4.6235		AdYAP1	hANKRD1	1.85718	20.0654	5.80779		AdYAP1	hANKRD1	7.50147	20.0462	6.78895
AdYAP1	hACTIN		14.2457			AdYAP1	hACTIN		14.2577			AdYAP1	hACTIN		13.2572
AdYAP1	hANKRD1	6.94456	19.1024	4.72305		AdYAP1	hANKRD1	1.85718	19.9688	6.17928		AdYAP1	hANKRD1	7.50147	20.6227	7.3284
AdYAP1	hACTIN		14.3794			AdYAP1	hACTIN		13.7895			AdYAP1	hACTIN		13.2942
AdYAP2	hANKRD1	5.09759	19.9658	5.26125		AdYAP2	hANKRD1	1.49697	19.7959	6.16708		AdYAP2	hANKRD1	6.99706	19.9701	7.08419
AdYAP2	hACTIN		14.7045			AdYAP2	hACTIN		13.6288			AdYAP2	hACTIN		12.8859
AdYAP2	hANKRD1	5.09759	18.5119	4.85951		AdYAP2	hANKRD1	1.49697	20.0931	6.13316		AdYAP2	hANKRD1	6.99706	20.2397	7.49811
AdYAP2	hACTIN		13.6524			AdYAP2	hACTIN		13.9599			AdYAP2	hACTIN		12.7416
AdYAP2	hANKRD1	5.09759	19.5728	4.53102		AdYAP2	hANKRD1	1.49697	19.9411	5.90139		AdYAP2	hANKRD1	6.99706	20.3821	6.94365
AdYAP2	hACTIN		15.0418			AdYAP2	hACTIN		14.0397			AdYAP2	hACTIN		13.4385
AdTAZ1	hANKRD1	5.75097	19.9034	4.46676		AdTAZ1	hANKRD1	3.1266	20.0556	4.83677		AdTAZ1	hANKRD1	7.878	20.4439	6.76135
AdTAZ1	hACTIN		15.4366			AdTAZ1	hACTIN		15.2188			AdTAZ1	hACTIN		13.6826
AdTAZ1	hANKRD1	5.75097	20.2707	4.72234		AdTAZ1	hANKRD1	3.1266	20.6578	4.99146		AdTAZ1	hANKRD1	7.878	20.6259	7.18459
AdTAZ1	hACTIN		15.5484			AdTAZ1	hACTIN		15.6663			AdTAZ1	hACTIN		13.4413
AdTAZ1	hANKRD1	5.75097	20.2304	4.94071		AdTAZ1	hANKRD1	3.1266	20.5306	5.18575		AdTAZ1	hANKRD1	7.878	20.4457	7.06677
AdTAZ1	hACTIN		15.2897			AdTAZ1	hACTIN		15.3449			AdTAZ1	hACTIN		13.3789
AdTAZ2	hANKRD1	5.42943	18.6438	3.9746		AdTAZ2	hANKRD1	2.08079	20.8933	5.78544		AdTAZ2	hANKRD1	7.91909	20.1509	6.26725
AdTAZ2	hACTIN		14.6692			AdTAZ2	hACTIN		15.1079			AdTAZ2	hACTIN		13.8836
AdTAZ2	hANKRD1	5.42943	18.9036	5.27116		AdTAZ2	hANKRD1	2.08079	20.9711	5.90274		AdTAZ2	hANKRD1	7.91909	20.1881	7.39473
AdTAZ2	hACTIN		13.6324			AdTAZ2	hACTIN		15.0683			AdTAZ2	hACTIN		12.7934
AdTAZ2	hANKRD1	5.42943	19.0632	5.13307		AdTAZ2	hANKRD1	2.08079	21.2656	5.08819		AdTAZ2	hANKRD1	7.91909	20.1752	7.32822
AdTAZ2	hACTIN		13.9302			AdTAZ2	hACTIN		16.1775			AdTAZ2	hACTIN		12.847
CTGF
Run 1						Run 2						Run 3
Sample Name	Target Name	RQ	Cт	ΔCт		Sample Name	Target Name	RQ	Cт	ΔCт		Sample Name	Target Name	RQ	Cт	ΔCт
AdGFP1	hCTGF	1	17.8756	2.64459		AdGFP1	hCTGF	1	16.9673	2.91188		AdGFP1	hCTGF	1	18.2963	4.69207
AdGFP1	hACTIN		15.231			AdGFP1	hACTIN		14.0554			AdGFP1	hACTIN		13.6042
AdGFP1	hCTGF	1	17.9249	2.66725		AdGFP1	hCTGF	1	16.9292	2.93654		AdGFP1	hCTGF	1	18.3625	4.75741
AdGFP1	hACTIN		15.2576			AdGFP1	hACTIN		13.9927			AdGFP1	hACTIN		13.6051
AdGFP1	hCTGF	1	17.8546	2.42577		AdGFP1	hCTGF	1	16.8565	2.92844		AdGFP1	hCTGF	1	18.2689	4.5214
AdGFP1	hACTIN		15.4288			AdGFP1	hACTIN		13.9281			AdGFP1	hACTIN		13.7475
AdGFP2	hCTGF	1.02201	16.6674	2.32928		AdGFP2	hCTGF	1.02426	16.7431	3.07793		AdGFP2	hCTGF	0.742814	18.0371	4.97555
AdGFP2	hACTIN		14.3381			AdGFP2	hACTIN		13.6652			AdGFP2	hACTIN		13.0616
AdGFP2	hCTGF	1.02201	16.5601	2.63245		AdGFP2	hCTGF	1.02426	16.7087	2.75218		AdGFP2	hCTGF	0.742814	18.1179	5.13345
AdGFP2	hACTIN		13.9277			AdGFP2	hACTIN		13.9566			AdGFP2	hACTIN		12.9845
AdGFP2	hCTGF	1.02201	16.3593	2.68163		AdGFP2	hCTGF	1.02426	16.8803	2.84299		AdGFP2	hCTGF	0.742814	17.9848	5.14865
AdGFP2	hACTIN		13.6777			AdGFP2	hACTIN		14.0373			AdGFP2	hACTIN		12.8362
AdYAP1	hCTGF	4.50208	15.61	0.158982		AdYAP1	hCTGF	1.3974	15.888	2.08008		AdYAP1	hCTGF	2.35392	15.9266	3.56502
AdYAP1	hACTIN		15.451			AdYAP1	hACTIN		13.8079			AdYAP1	hACTIN		12.3616
AdYAP1	hCTGF	4.50208	15.2534	0.696853		AdYAP1	hCTGF	1.3974	15.9158	2.47746		AdYAP1	hCTGF	2.35392	15.6935	3.44608
AdYAP1	hACTIN		14.5566			AdYAP1	hACTIN		13.4384			AdYAP1	hACTIN		12.2474
AdYAP1	hCTGF	4.50208	15.5702	0.369994		AdYAP1	hCTGF	1.3974	15.9364	2.7711		AdYAP1	hCTGF	2.35392	15.629	3.25458
AdYAP1	hACTIN		15.2002			AdYAP1	hACTIN		13.1653			AdYAP1	hACTIN		12.3744
AdYAP2	hCTGF	2.26222	17.1389	1.4599		AdYAP2	hCTGF	1.53483	15.627	2.32447		AdYAP2	hCTGF	2.78361	15.8448	3.31774
AdYAP2	hACTIN		15.679			AdYAP2	hACTIN		13.3025			AdYAP2	hACTIN		12.527
AdYAP2	hCTGF	2.26222	14.8824	1.47676		AdYAP2	hCTGF	1.53483	15.9379	2.52976		AdYAP2	hCTGF	2.78361	15.6947	2.668
AdYAP2	hACTIN		13.4056			AdYAP2	hACTIN		13.4082			AdYAP2	hACTIN		13.0267
AdYAP2	hCTGF	2.26222	17.106	1.26772		AdYAP2	hCTGF	1.53483	15.7614	2.06839		AdYAP2	hCTGF	2.78361	16.0136	3.55427
AdYAP2	hACTIN		15.8383			AdYAP2	hACTIN		13.693			AdYAP2	hACTIN		12.4593
AdTAZ1	hCTGF	6.0037	16.2666	0.219107		AdTAZ1	hCTGF	2.81266	16.5092	1.57023		AdTAZ1	hCTGF	3.24564	16.6882	2.93101
AdTAZ1	hACTIN		16.0475			AdTAZ1	hACTIN		14.9389			AdTAZ1	hACTIN		13.7572
AdTAZ1	hCTGF	6.0037	14.6316	-0.206052		AdTAZ1	hCTGF	2.81266	16.383	1.39364		AdTAZ1	hCTGF	3.24564	15.8774	2.87322
AdTAZ1	hACTIN		14.8377			AdTAZ1	hACTIN		14.9894			AdTAZ1	hACTIN		13.0042
AdTAZ1	hCTGF	6.0037	14.8584	-0.0330124		AdTAZ1	hCTGF	2.81266	16.249	1.33719		AdTAZ1	hCTGF	3.24564	16.1057	3.07114
AdTAZ1	hACTIN		14.8914			AdTAZ1	hACTIN		14.9118			AdTAZ1	hACTIN		13.0345
AdTAZ2	hCTGF	4.02782	16.049	0.0886469		AdTAZ2	hCTGF	2.48139	16.3449	1.56766		AdTAZ2	hCTGF	2.47229	15.7531	2.96998
AdTAZ2	hACTIN		15.9604			AdTAZ2	hACTIN		14.7773			AdTAZ2	hACTIN		12.7832
AdTAZ2	hCTGF	4.02782	15.0664	0.868939		AdTAZ2	hCTGF	2.48139	16.2793	1.6802		AdTAZ2	hCTGF	2.47229	15.781	3.70091
AdTAZ2	hACTIN		14.1975			AdTAZ2	hACTIN		14.5991			AdTAZ2	hACTIN		12.0801
AdTAZ2	hCTGF	4.02782	15.4976	0.750012		AdTAZ2	hCTGF	2.48139	16.3246	1.59557		AdTAZ2	hCTGF	2.47229	15.6211	3.38244
AdTAZ2	hACTIN		14.7475			AdTAZ2	hACTIN		14.729			AdTAZ2	hACTIN		12.2387
Cyr61
Run 1						Run 2						Run 3
Sample Name	Target Name	RQ	Cт	ΔCт		Sample Name	Target Name	RQ	Cт	ΔCт		Sample Name	Target Name	RQ	Cт	ΔCт
AdGFP1	hCYR61	1	16.6682	1.08315		AdGFP1	hCYR61	1	18.9586	4.67075		AdGFP1	hCYR61	1	20.0263	6.17375
AdGFP1	hACTIN		15.5851			AdGFP1	hACTIN		14.2879			AdGFP1	hACTIN		13.8525
AdGFP1	hCYR61	1	16.5453	1.16712		AdGFP1	hCYR61	1	18.8425	5.0421		AdGFP1	hCYR61	1	19.9554	6.3333
AdGFP1	hACTIN		15.3782			AdGFP1	hACTIN		13.8004			AdGFP1	hACTIN		13.6221
AdGFP1	hCYR61	1	16.7483	1.06732		AdGFP1	hCYR61	1	18.7339	4.6		AdGFP1	hCYR61	1	20.1174	6.12529
AdGFP1	hACTIN		15.681			AdGFP1	hACTIN		14.1339			AdGFP1	hACTIN		13.9921
AdGFP2	hCYR61	0.914697	16.7932	1.00085		AdGFP2	hCYR61	0.988606	18.9214	4.81708		AdGFP2	hCYR61	0.999634	19.5311	5.98025
AdGFP2	hACTIN		15.7924			AdGFP2	hACTIN		14.1044			AdGFP2	hACTIN		13.5509
AdGFP2	hCYR61	0.914697	14.8416	1.30478		AdGFP2	hCYR61	0.988606	18.7656	4.71902		AdGFP2	hCYR61	0.999634	19.6939	6.37155
AdGFP2	hACTIN		13.5368			AdGFP2	hACTIN		14.0466			AdGFP2	hACTIN		13.3223
AdGFP2	hCYR61	0.914697	16.7203	1.39786		AdGFP2	hCYR61	0.988606	18.8179	4.82635		AdGFP2	hCYR61	0.999634	19.8064	6.28214
AdGFP2	hACTIN		15.3224			AdGFP2	hACTIN		13.9915			AdGFP2	hACTIN		13.5243
AdYAP1	hCYR61	3.01077	12.9593	-0.676883		AdYAP1	hCYR61	2.03658	17.4356	3.63623		AdYAP1	hCYR61	4.30805	17.1089	4.07161
AdYAP1	hACTIN		13.6361			AdYAP1	hACTIN		13.7993			AdYAP1	hACTIN		13.0373
AdYAP1	hCYR61	3.01077	13.784	-0.594384		AdYAP1	hCYR61	2.03658	17.4047	3.8051		AdYAP1	hCYR61	4.30805	17.3417	4.17624
AdYAP1	hACTIN		14.3784			AdYAP1	hACTIN		13.5996			AdYAP1	hACTIN		13.1655
AdYAP1	hCYR61	3.01077	13.7815	-0.18154		AdYAP1	hCYR61	2.03658	17.2479	3.79309		AdYAP1	hCYR61	4.30805	16.9247	4.06339
AdYAP1	hACTIN		13.963			AdYAP1	hACTIN		13.4548			AdYAP1	hACTIN		12.8613
AdYAP2	hCYR61	2.49729	14.4432	-0.131294		AdYAP2	hCYR61	1.93567	17.5599	3.60498		AdYAP2	hCYR61	5.08544	16.9928	4.29272
AdYAP2	hACTIN		14.5745			AdYAP2	hACTIN		13.9549			AdYAP2	hACTIN		12.7001
AdYAP2	hCYR61	2.49729	13.8977	-0.295917		AdYAP2	hCYR61	1.93567	17.4088	4.02328		AdYAP2	hCYR61	5.08544	16.9686	4.12467
AdYAP2	hACTIN		14.1936			AdYAP2	hACTIN		13.3855			AdYAP2	hACTIN		12.8439
AdYAP2	hCYR61	2.49729	15.5498	-0.216294		AdYAP2	hCYR61	1.93567	17.6012	3.82608		AdYAP2	hCYR61	5.08544	16.3668	3.17583
AdYAP2	hACTIN		15.7661			AdYAP2	hACTIN		13.7751			AdYAP2	hACTIN		13.191
AdTAZ1	hCYR61	2.54015	14.7861	-0.155466		AdTAZ1	hCYR61	2.65662	18.7893	3.24834		AdTAZ1	hCYR61	5.34651	17.1291	3.51566
AdTAZ1	hACTIN		14.9416			AdTAZ1	hACTIN		15.5409			AdTAZ1	hACTIN		13.6135
AdTAZ1	hCYR61	2.54015	14.6313	-0.0649672		AdTAZ1	hCYR61	2.65662	18.7719	3.5647		AdTAZ1	hCYR61	5.34651	17.5283	4.25852
AdTAZ1	hACTIN		14.6962			AdTAZ1	hACTIN		15.2072			AdTAZ1	hACTIN		13.2698
AdTAZ1	hCYR61	2.54015	14.2621	-0.496714		AdTAZ1	hCYR61	2.65662	18.4466	3.27104		AdTAZ1	hCYR61	5.34651	17.1587	3.60238
AdTAZ1	hACTIN		14.7588			AdTAZ1	hACTIN		15.1755			AdTAZ1	hACTIN		13.5563
AdTAZ2	hCYR61	2.79694	13.8281	-0.642301		AdTAZ2	hCYR61	2.35185	18.2651	3.58624		AdTAZ2	hCYR61	4.09952	16.9953	3.97191
AdTAZ2	hACTIN		14.4704			AdTAZ2	hACTIN		14.6788			AdTAZ2	hACTIN		13.0234
AdTAZ2	hCYR61	2.79694	14.0497	-0.385839		AdTAZ2	hCYR61	2.35185	18.3217	3.4732		AdTAZ2	hCYR61	4.09952	17.0402	4.18249
AdTAZ2	hACTIN		14.4355			AdTAZ2	hACTIN		14.8485			AdTAZ2	hACTIN		12.8577
AdTAZ2	hCYR61	2.79694	13.4552	-0.105818		AdTAZ2	hCYR61	2.35185	18.6548	3.55202		AdTAZ2	hCYR61	4.09952	17.1748	4.37158
AdTAZ2	hACTIN		13.5611			AdTAZ2	hACTIN		15.1028			AdTAZ2	hACTIN		12.8032
ID1
Run 1						Run 2						Run 3
Sample Name	Target Name	RQ	Cт	ΔCт		Sample Name	Target Name	RQ	Cт	ΔCт		Sample Name	Target Name	RQ	Cт	ΔCт
AdGFP1	hID1	1	17.6991	1.47032		AdGFP1	hID1	1	19.3772	3.04969		AdGFP1	hID1	1	20.9793	3.23391
AdGFP1	hACTIN		16.2288			AdGFP1	hACTIN		16.3276			AdGFP1	hACTIN		17.7454
AdGFP1	hID1	1	17.6976	2.15326		AdGFP1	hID1	1	19.3451	3.78748		AdGFP1	hID1	1	20.7574	3.60644
AdGFP1	hACTIN		15.5444			AdGFP1	hACTIN		15.5576			AdGFP1	hACTIN		17.151
AdGFP1	hID1	1	17.5677	2.12073		AdGFP1	hID1	1	19.4239	3.77288		AdGFP1	hID1	1	20.8535	3.57084
AdGFP1	hACTIN		15.447			AdGFP1	hACTIN		15.651			AdGFP1	hACTIN		17.2827
AdGFP2	hID1	0.63559	17.1026	2.25075		AdGFP2	hID1	0.855109	19.3524	3.6867		AdGFP2	hID1	0.961527	20.3201	3.47305
AdGFP2	hACTIN		14.8519			AdGFP2	hACTIN		15.6657			AdGFP2	hACTIN		16.847
AdGFP2	hID1	0.63559	17.1072	2.67871		AdGFP2	hID1	0.855109	19.3995	3.69149		AdGFP2	hID1	0.961527	20.3059	3.4797
AdGFP2	hACTIN		14.4285			AdGFP2	hACTIN		15.708			AdGFP2	hACTIN		16.8262
AdGFP2	hID1	0.63559	17.0641	2.77633		AdGFP2	hID1	0.855109	19.4726	3.90932		AdGFP2	hID1	0.961527	20.3775	3.62825
AdGFP2	hACTIN		14.2877			AdGFP2	hACTIN		15.5633			AdGFP2	hACTIN		16.7493
AdYAP1	hID1	0.737775	17.1455	2.43232		AdYAP1	hID1	0.83729	18.9821	3.63939		AdYAP1	hID1	1.04346	19.5852	3.1793
AdYAP1	hACTIN		14.7132			AdYAP1	hACTIN		15.3427			AdYAP1	hACTIN		16.4059
AdYAP1	hID1	0.737775	16.8233	2.23319		AdYAP1	hID1	0.83729	19.0749	3.94019		AdYAP1	hID1	1.04346	19.62	3.40997
AdYAP1	hACTIN		14.5901			AdYAP1	hACTIN		15.1347			AdYAP1	hACTIN		16.21
AdYAP1	hID1	0.737775	17.0529	2.39503		AdYAP1	hID1	0.83729	19.0073	3.79907		AdYAP1	hID1	1.04346	19.6172	3.63781
AdYAP1	hACTIN		14.6579			AdYAP1	hACTIN		15.2082			AdYAP1	hACTIN		15.9794
AdYAP2	hID1	0.653548	17.1355	2.85111		AdYAP2	hID1	0.92797	19.6567	3.66462		AdYAP2	hID1	1.19839	19.4655	3.46514
AdYAP2	hACTIN		14.2844			AdYAP2	hACTIN		15.9921			AdYAP2	hACTIN		16.0003
AdYAP2	hID1	0.653548	17.0769	2.4813		AdYAP2	hID1	0.92797	19.6308	3.63967		AdYAP2	hID1	1.19839	19.514	3.38586
AdYAP2	hACTIN		14.5956			AdYAP2	hACTIN		15.9912			AdYAP2	hACTIN		16.1282
AdYAP2	hID1	0.653548	17.2728	2.2528		AdYAP2	hID1	0.92797	19.6739	3.6293		AdYAP2	hID1	1.19839	19.6358	2.7769
AdYAP2	hACTIN		15.02			AdYAP2	hACTIN		16.0446			AdYAP2	hACTIN		16.8589
AdTAZ1	hID1	0.715368	17.6082	2.1781		AdTAZ1	hID1	0.690176	20.3836	3.96259		AdTAZ1	hID1	0.587611	20.7156	4.15851
AdTAZ1	hACTIN		15.4301			AdTAZ1	hACTIN		16.421			AdTAZ1	hACTIN		16.557
AdTAZ1	hID1	0.715368	17.6926	2.45276		AdTAZ1	hID1	0.690176	20.8686	4.00178		AdTAZ1	hID1	0.587611	20.7368	4.25192
AdTAZ1	hACTIN		15.2399			AdTAZ1	hACTIN		16.8669			AdTAZ1	hACTIN		16.4848
AdTAZ1	hID1	0.715368	17.7254	2.56317		AdTAZ1	hID1	0.690176	20.5392	4.25056		AdTAZ1	hID1	0.587611	20.8822	4.30196
AdTAZ1	hACTIN		15.1623			AdTAZ1	hACTIN		16.2886			AdTAZ1	hACTIN		16.5803
AdTAZ2	hID1	0.573415	17.3194	2.25905		AdTAZ2	hID1	0.583614	19.5187	4.64486		AdTAZ2	hID1	0.5341	20.6004	4.14294
AdTAZ2	hACTIN		15.0603			AdTAZ2	hACTIN		14.8739			AdTAZ2	hACTIN		16.4574
AdTAZ2	hID1	0.573415	17.3194	3.17367		AdTAZ2	hID1	0.583614	19.471	4.42716		AdTAZ2	hID1	0.5341	20.45	4.48938
AdTAZ2	hACTIN		14.1457			AdTAZ2	hACTIN		15.0438			AdTAZ2	hACTIN		15.9606
AdTAZ2	hID1	0.573415	17.381	2.71863		AdTAZ2	hID1	0.583614	19.5665	3.86877		AdTAZ2	hID1	0.5341	20.5697	4.49333
AdTAZ2	hACTIN		14.6623			AdTAZ2	hACTIN		15.6977			AdTAZ2	hACTIN		16.0763
ID3
Run 1						Run 2						Run 3
Sample Name	Target Name	RQ	Cт	ΔCт		Sample Name	Target Name	RQ	Cт	ΔCт		Sample Name	Target Name	RQ	Cт	ΔCт
AdGFP1	hID3	1	20.9165	5.37211		AdGFP1	hID3	1	19.9612	4.22188		AdGFP1	hID3	1	20.992	3.35658
AdGFP1	hACTIN		15.5444			AdGFP1	hACTIN		15.7393			AdGFP1	hACTIN		17.6354
AdGFP1	hID3	1	20.9674	5.33619		AdGFP1	hID3	1	19.87	4.45067		AdGFP1	hID3	1	20.9607	3.78628
AdGFP1	hACTIN		15.6312			AdGFP1	hACTIN		15.4193			AdGFP1	hACTIN		17.1744
AdGFP1	hID3	1	21.1039	5.3451		AdGFP1	hID3	1	19.9472	4.32238		AdGFP1	hID3	1	20.9783	3.36903
AdGFP1	hACTIN		15.7588			AdGFP1	hACTIN		15.6248			AdGFP1	hACTIN		17.6093
AdGFP2	hID3	0.780155	20.3024	5.533		AdGFP2	hID3	0.884281	19.8228	4.5245		AdGFP2	hID3	0.803245	20.6742	3.67872
AdGFP2	hACTIN		14.7694			AdGFP2	hACTIN		15.2983			AdGFP2	hACTIN		16.9955
AdGFP2	hID3	0.780155	20.4253	5.8322		AdGFP2	hID3	0.884281	19.9831	4.47527		AdGFP2	hID3	0.803245	20.8492	3.87707
AdGFP2	hACTIN		14.5931			AdGFP2	hACTIN		15.5078			AdGFP2	hACTIN		16.9721
AdGFP2	hID3	0.780155	20.4197	5.7627		AdGFP2	hID3	0.884281	19.9819	4.52744		AdGFP2	hID3	0.803245	20.8194	3.90435
AdGFP2	hACTIN		14.657			AdGFP2	hACTIN		15.4544			AdGFP2	hACTIN		16.9151
AdYAP1	hID3	0.823102	20.1134	5.5531		AdYAP1	hID3	0.998538	19.4574	4.3533		AdYAP1	hID3	0.883759	19.918	3.71642
AdYAP1	hACTIN		14.5603			AdYAP1	hACTIN		15.1041			AdYAP1	hACTIN		16.2016
AdYAP1	hID3	0.823102	19.7279	5.32763		AdYAP1	hID3	0.998538	19.5563	4.30294		AdYAP1	hID3	0.883759	19.8852	3.66799
AdYAP1	hACTIN		14.4003			AdYAP1	hACTIN		15.2534			AdYAP1	hACTIN		16.2172
AdYAP1	hID3	0.823102	20.6565	6.01524		AdYAP1	hID3	0.998538	19.2992	4.34502		AdYAP1	hID3	0.883759	19.9457	3.66231
AdYAP1	hACTIN		14.6412			AdYAP1	hACTIN		14.9542			AdYAP1	hACTIN		16.2834
AdYAP2	hID3	0.818834	20.3792	5.78296		AdYAP2	hID3	1.40636	20.0066	3.81003		AdYAP2	hID3	0.923893	19.8197	3.68989
AdYAP2	hACTIN		14.5962			AdYAP2	hACTIN		16.1965			AdYAP2	hACTIN		16.1298
AdYAP2	hID3	0.818834	20.3823	5.66869		AdYAP2	hID3	1.40636	19.9917	3.84671		AdYAP2	hID3	0.923893	19.8239	3.58688
AdYAP2	hACTIN		14.7136			AdYAP2	hACTIN		16.145			AdYAP2	hACTIN		16.237
AdYAP2	hID3	0.818834	20.5026	5.46682		AdYAP2	hID3	1.40636	20.0709	3.8623		AdYAP2	hID3	0.923893	19.8749	3.57772
AdYAP2	hACTIN		15.0358			AdYAP2	hACTIN		16.2086			AdYAP2	hACTIN		16.2972
AdTAZ1	hID3	1.09059	20.8187	5.2907		AdTAZ1	hID3	1.09528	20.8837	4.35609		AdTAZ1	hID3	0.790232	20.7114	3.87903
AdTAZ1	hACTIN		15.528			AdTAZ1	hACTIN		16.5276			AdTAZ1	hACTIN		16.8324
AdTAZ1	hID3	1.09059	20.6177	5.24059		AdTAZ1	hID3	1.09528	20.7153	4.05715		AdTAZ1	hID3	0.790232	20.5718	3.76755
AdTAZ1	hACTIN		15.3772			AdTAZ1	hACTIN		16.6581			AdTAZ1	hACTIN		16.8043
AdTAZ1	hID3	1.09059	20.5867	5.14679		AdTAZ1	hID3	1.09528	20.678	4.1878		AdTAZ1	hID3	0.790232	20.6504	3.88426
AdTAZ1	hACTIN		15.4399			AdTAZ1	hACTIN		16.4902			AdTAZ1	hACTIN		16.7661
AdTAZ2	hID3	0.751733	20.4014	5.35369		AdTAZ2	hID3	0.695864	19.7293	4.90274		AdTAZ2	hID3	0.639108	20.5981	3.88401
AdTAZ2	hACTIN		15.0477			AdTAZ2	hACTIN		14.8265			AdTAZ2	hACTIN		16.714
AdTAZ2	hID3	0.751733	20.4611	6.10454		AdTAZ2	hID3	0.695864	19.7289	4.92155		AdTAZ2	hID3	0.639108	20.6566	4.41
AdTAZ2	hACTIN		14.3565			AdTAZ2	hACTIN		14.8074			AdTAZ2	hACTIN		16.2466
AdTAZ2	hID3	0.751733	20.4002	5.83029		AdTAZ2	hID3	0.695864	19.7988	4.74001		AdTAZ2	hID3	0.639108	20.5379	4.15549
AdTAZ2	hACTIN		14.5699			AdTAZ2	hACTIN		15.0588			AdTAZ2	hACTIN		16.3824
SMAD6
Run 1						Run 2						Run 3
Sample Name	Target Name	RQ	Cт	ΔCт		Sample Name	Target Name	RQ	Cт	ΔCт		Sample Name	Target Name	RQ	Cт	ΔCт
AdGFP1	hSMAD6	1	25.5057	10.0236		AdGFP1	hSMAD6	1	24.374	8.79157		AdGFP1	hSMAD6	1	24.8259	7.38359
AdGFP1	hACTIN		15.4822			AdGFP1	hACTIN		15.5825			AdGFP1	hACTIN		17.4423
AdGFP1	hSMAD6	1	25.4348	9.9299		AdGFP1	hSMAD6	1	24.4087	9.20306		AdGFP1	hSMAD6	1	24.8241	7.61706
AdGFP1	hACTIN		15.5049			AdGFP1	hACTIN		15.2057			AdGFP1	hACTIN		17.207
AdGFP1	hSMAD6	1	25.5928	9.87742		AdGFP1	hSMAD6	1	24.3753	9.17335		AdGFP1	hSMAD6	1	24.8964	7.5243
AdGFP1	hACTIN		15.7153			AdGFP1	hACTIN		15.202			AdGFP1	hACTIN		17.3721
AdGFP2	hSMAD6	1.05857	24.4355	9.80688		AdGFP2	hSMAD6	0.898338	24.5636	9.22		AdGFP2	hSMAD6	0.956228	24.4616	7.46002
AdGFP2	hACTIN		14.6286			AdGFP2	hACTIN		15.3436			AdGFP2	hACTIN		17.0016
AdGFP2	hSMAD6	1.05857	24.3774	9.82686		AdGFP2	hSMAD6	0.898338	24.5395	9.04637		AdGFP2	hSMAD6	0.956228	24.3952	7.57536
AdGFP2	hACTIN		14.5505			AdGFP2	hACTIN		15.4931			AdGFP2	hACTIN		16.8199
AdGFP2	hSMAD6	1.05857	24.4024	9.95079		AdGFP2	hSMAD6	0.898338	24.5948	9.36561		AdGFP2	hSMAD6	0.956228	24.3643	7.6833
AdGFP2	hACTIN		14.4516			AdGFP2	hACTIN		15.2292			AdGFP2	hACTIN		16.681
AdYAP1	hSMAD6	0.48122	25.4578	10.9533		AdYAP1	hSMAD6	0.632597	24.6887	9.62927		AdYAP1	hSMAD6	0.52368	24.6818	8.42508
AdYAP1	hACTIN		14.5045			AdYAP1	hACTIN		15.0595			AdYAP1	hACTIN		16.2567
AdYAP1	hSMAD6	0.48122	25.5078	11.0694		AdYAP1	hSMAD6	0.632597	24.6237	9.85672		AdYAP1	hSMAD6	0.52368	24.697	8.53712
AdYAP1	hACTIN		14.4385			AdYAP1	hACTIN		14.767			AdYAP1	hACTIN		16.1599
AdYAP1	hSMAD6	0.48122	25.3117	10.9739		AdYAP1	hSMAD6	0.632597	24.4985	9.66391		AdYAP1	hSMAD6	0.52368	24.5988	8.36248
AdYAP1	hACTIN		14.3378			AdYAP1	hACTIN		14.8346			AdYAP1	hACTIN		16.2363
AdYAP2	hSMAD6	0.476898	25.7177	11.2127		AdYAP2	hSMAD6	0.763113	25.6909	9.33946		AdYAP2	hSMAD6	0.487487	24.7537	8.58363
AdYAP2	hACTIN		14.5049			AdYAP2	hACTIN		16.3514			AdYAP2	hACTIN		16.17
AdYAP2	hSMAD6	0.476898	25.8328	10.7973		AdYAP2	hSMAD6	0.763113	25.6908	9.60827		AdYAP2	hSMAD6	0.487487	24.7058	8.40796
AdYAP2	hACTIN		15.0355			AdYAP2	hACTIN		16.0825			AdYAP2	hACTIN		16.2978
AdYAP2	hSMAD6	0.476898	25.7463	11.0256		AdYAP2	hSMAD6	0.763113	25.6291	9.39034		AdYAP2	hSMAD6	0.487487	24.9606	8.64304
AdYAP2	hACTIN		14.7207			AdYAP2	hACTIN		16.2387			AdYAP2	hACTIN		16.3175
AdTAZ1	hSMAD6	0.839813	25.9601	9.86166		AdTAZ1	hSMAD6	0.963768	25.9193	8.74925		AdTAZ1	hSMAD6	0.508741	25.6381	8.23556
AdTAZ1	hACTIN		16.0984			AdTAZ1	hACTIN		17.1701			AdTAZ1	hACTIN		17.4025
AdTAZ1	hSMAD6	0.839813	25.8429	10.4372		AdTAZ1	hSMAD6	0.963768	25.9603	9.34349		AdTAZ1	hSMAD6	0.508741	25.5828	8.63593
AdTAZ1	hACTIN		15.4057			AdTAZ1	hACTIN		16.6168			AdTAZ1	hACTIN		16.9469
AdTAZ1	hSMAD6	0.839813	25.8854	10.2876		AdTAZ1	hSMAD6	0.963768	25.9424	9.23497		AdTAZ1	hSMAD6	0.508741	25.6499	8.57845
AdTAZ1	hACTIN		15.5978			AdTAZ1	hACTIN		16.7074			AdTAZ1	hACTIN		17.0714
AdTAZ2	hSMAD6	0.489729	25.5928	10.8324		AdTAZ2	hSMAD6	0.604677	24.5979	9.78323		AdTAZ2	hSMAD6	0.422847	25.3622	8.52221
AdTAZ2	hACTIN		14.7604			AdTAZ2	hACTIN		14.8147			AdTAZ2	hACTIN		16.84
AdTAZ2	hSMAD6	0.489729	25.6905	10.9779		AdTAZ2	hSMAD6	0.604677	24.733	9.82233		AdTAZ2	hSMAD6	0.422847	25.4417	8.80741
AdTAZ2	hACTIN		14.7126			AdTAZ2	hACTIN		14.9106			AdTAZ2	hACTIN		16.6343
AdTAZ2	hSMAD6	0.489729	25.82	11.1104		AdTAZ2	hSMAD6	0.604677	24.9062	9.7397		AdTAZ2	hSMAD6	0.422847	25.4538	8.92071
AdTAZ2	hACTIN		14.7096			AdTAZ2	hACTIN		15.1665			AdTAZ2	hACTIN		16.5331
UNC5B
Run 1						Run 2						Run 3
Sample Name	Target Name	RQ	Cт	ΔCт		Sample Name	Target Name	RQ	Cт	ΔCт		Sample Name	Target Name	RQ	Cт	ΔCт
AdGFP1	hUNC5B	1	25.9653	11.7348		AdGFP1	hUNC5B	1	25.845	12.138		AdGFP1	hUNC5B	1	26.2002	11.8388
AdGFP1	hACTIN		14.2305			AdGFP1	hACTIN		13.707			AdGFP1	hACTIN		14.3614
AdGFP1	hUNC5B	1	25.8193	11.9354		AdGFP1	hUNC5B	1	25.9615	12.3907		AdGFP1	hUNC5B	1	26.3785	11.8184
AdGFP1	hACTIN		13.8839			AdGFP1	hACTIN		13.5708			AdGFP1	hACTIN		14.5602
AdGFP1	hUNC5B	1	25.6136	11.4475		AdGFP1	hUNC5B	1	26.2937	11.9806		AdGFP1	hUNC5B	1	25.954	11.6252
AdGFP1	hACTIN		14.1661			AdGFP1	hACTIN		14.3131			AdGFP1	hACTIN		14.3287
AdGFP2	hUNC5B	0.976576	26.1485	11.7817		AdGFP2	hUNC5B	0.976576	26.2544	12.0278		AdGFP2	hUNC5B	0.976576	25.7326	11.5633
AdGFP2	hACTIN		14.3668			AdGFP2	hACTIN		14.2266			AdGFP2	hACTIN		14.1693
AdGFP2	hUNC5B	0.976576	25.4099	11.5389		AdGFP2	hUNC5B	0.976576	26.2633	12.6045		AdGFP2	hUNC5B	0.976576	25.7149	11.8072
AdGFP2	hACTIN		13.871			AdGFP2	hACTIN		13.6588			AdGFP2	hACTIN		13.9077
AdGFP2	hUNC5B	0.976576	25.4921	11.7368		AdGFP2	hUNC5B	0.976576	26.2793	12.4114		AdGFP2	hUNC5B	0.976576	25.912	11.7456
AdGFP2	hACTIN		13.7553			AdGFP2	hACTIN		13.8679			AdGFP2	hACTIN		14.1664
AdYAP1	hUNC5B	0.243858	27.8059	14.104		AdYAP1	hUNC5B	0.243858	27.4266	14.0756		AdYAP1	hUNC5B	0.243858	26.689	13.4056
AdYAP1	hACTIN		13.7019			AdYAP1	hACTIN		13.351			AdYAP1	hACTIN		13.2834
AdYAP1	hUNC5B	0.243858	27.8761	14.0161		AdYAP1	hUNC5B	0.243858	27.2927	14.3256		AdYAP1	hUNC5B	0.243858	26.962	13.4687
AdYAP1	hACTIN		13.86			AdYAP1	hACTIN		12.9671			AdYAP1	hACTIN		13.4933
AdYAP1	hUNC5B	0.243858	27.828	14.3506		AdYAP1	hUNC5B	0.243858	27.0793	13.8882		AdYAP1	hUNC5B	0.243858	27.0361	13.5979
AdYAP1	hACTIN		13.4774			AdYAP1	hACTIN		13.1911			AdYAP1	hACTIN		13.4382
AdYAP2	hUNC5B	0.273967	27.6557	14.183		AdYAP2	hUNC5B	0.273967	27.5528	13.5945		AdYAP2	hUNC5B	0.273967	27.1258	13.69
AdYAP2	hACTIN		13.4727			AdYAP2	hACTIN		13.9583			AdYAP2	hACTIN		13.4358
AdYAP2	hUNC5B	0.273967	27.4359	13.7641		AdYAP2	hUNC5B	0.273967	27.9346	13.4099		AdYAP2	hUNC5B	0.273967	27.2501	13.7378
AdYAP2	hACTIN		13.6718			AdYAP2	hACTIN		14.5247			AdYAP2	hACTIN		13.5123
AdYAP2	hUNC5B	0.273967	28.0988	13.7701		AdYAP2	hUNC5B	0.273967	28.2051	13.7284		AdYAP2	hUNC5B	0.273967	27.2745	13.8428
AdYAP2	hACTIN		14.3287			AdYAP2	hACTIN		14.4767			AdYAP2	hACTIN		13.4317
AdTAZ1	hUNC5B	0.17297	28.085	14.6385		AdTAZ1	hUNC5B	0.17297	28.6914	14.0813		AdTAZ1	hUNC5B	0.17297	28.4597	14.5166
AdTAZ1	hACTIN		13.4465			AdTAZ1	hACTIN		14.6101			AdTAZ1	hACTIN		13.9431
AdTAZ1	hUNC5B	0.17297	28.82	14.642		AdTAZ1	hUNC5B	0.17297	28.7543	14.1569		AdTAZ1	hUNC5B	0.17297	28.0667	14.6267
AdTAZ1	hACTIN		14.1779			AdTAZ1	hACTIN		14.5973			AdTAZ1	hACTIN		13.44
AdTAZ1	hUNC5B	0.17297	28.3689	14.5753		AdTAZ1	hUNC5B	0.17297	28.9681	14.047		AdTAZ1	hUNC5B	0.17297	28.7908	14.4076
AdTAZ1	hACTIN		13.7937			AdTAZ1	hACTIN		14.9211			AdTAZ1	hACTIN		14.3832
AdTAZ2	hUNC5B	0.181961	27.7351	14.1849		AdTAZ2	hUNC5B	0.181961	28.2691	14.3483		AdTAZ2	hUNC5B	0.181961	27.9751	14.1666
AdTAZ2	hACTIN		13.5502			AdTAZ2	hACTIN		13.9208			AdTAZ2	hACTIN		13.8085
AdTAZ2	hUNC5B	0.181961	27.8941	14.6263		AdTAZ2	hUNC5B	0.181961	26.1178	13.8862		AdTAZ2	hUNC5B	0.181961	27.75	14.7527
AdTAZ2	hACTIN		13.2678			AdTAZ2	hACTIN		12.2316			AdTAZ2	hACTIN		12.9973
AdTAZ2	hUNC5B	0.181961	27.9936	14.5687		AdTAZ2	hUNC5B	0.181961	26.9133	14.0379		AdTAZ2	hUNC5B	0.181961	27.6229	14.4625
AdTAZ2	hACTIN		13.4249			AdTAZ2	hACTIN		12.8754			AdTAZ2	hACTIN		13.1604

## Sheet: FIgure 7F
Figure 7F - Reverse transcriptase PCR of YAP/TAZ knockdown HUVECs and control
	Sample Name	Target Name	Task	Reporter	Quencher	CT	Ct Mean		Sample Name	Target Name	Task	Reporter	Quencher	CT	Ct Mean
	CTR 1-1	HPRT1	UNKNOWN	VIC	NFQ-MGB	33.263	31.9559		CTR1-1	HPRT1	UNKNOWN	VIC	NFQ-MGB	31.976	31.5634
	CTR 1-1	HPRT1	UNKNOWN	VIC	NFQ-MGB	30.649	31.9559		CTR1-1	HPRT1	UNKNOWN	VIC	NFQ-MGB	31.151	31.5634
	CTR 1-1	LFNG	UNKNOWN	FAM	NFQ-MGB	32.316	31.6092		CTR1-1	CTGF	UNKNOWN	FAM	NFQ-MGB	23.856	22.9708
	CTR 1-1	LFNG	UNKNOWN	FAM	NFQ-MGB	30.903	31.6092		CTR1-1	CTGF	UNKNOWN	FAM	NFQ-MGB	22.085	22.9708
	CTR 1-1	DLL4	UNKNOWN	FAM	NFQ-MGB	33.946	32.3276		CTR1-1	CYR61	UNKNOWN	FAM	NFQ-MGB	26.619	26.0161
	CTR 1-1	DLL4	UNKNOWN	FAM	NFQ-MGB	30.709	32.3276		CTR1-1	CYR61	UNKNOWN	FAM	NFQ-MGB	25.413	26.0161
	CTR 1-1	NRARP	UNKNOWN	FAM	NFQ-MGB	31.644	30.8425		CTR1-1	ANKRD1	UNKNOWN	FAM	NFQ-MGB	27.674	26.4305
	CTR 1-1	NRARP	UNKNOWN	FAM	NFQ-MGB	30.041	30.8425		CTR1-1	ANKRD1	UNKNOWN	FAM	NFQ-MGB	25.187	26.4305
	CTR 1-1	HES1	UNKNOWN	FAM	NFQ-MGB	32.482	32.5081		CTR1-2	HPRT1	UNKNOWN	VIC	NFQ-MGB	33.339	32.0103
	CTR 1-1	HES1	UNKNOWN	FAM	NFQ-MGB	32.534	32.5081		CTR1-2	HPRT1	UNKNOWN	VIC	NFQ-MGB	30.681	32.0103
	CTR 1-1	HEY1	UNKNOWN	FAM	NFQ-MGB	36.584	35.4378		CTR1-2	CTGF	UNKNOWN	FAM	NFQ-MGB	24.94	23.5274
	CTR 1-1	HEY1	UNKNOWN	FAM	NFQ-MGB	34.291	35.4378		CTR1-2	CTGF	UNKNOWN	FAM	NFQ-MGB	22.115	23.5274
	CTR 1-1	SMAD6	UNKNOWN	FAM	NFQ-MGB	33.366	33.209		CTR1-2	CYR61	UNKNOWN	FAM	NFQ-MGB	27.369	26.2667
	CTR 1-1	SMAD6	UNKNOWN	FAM	NFQ-MGB	33.052	33.209		CTR1-2	CYR61	UNKNOWN	FAM	NFQ-MGB	25.164	26.2667
	CTR 1-1	UNC5B	UNKNOWN	FAM	NFQ-MGB	37.537	36.0431		CTR1-2	ANKRD1	UNKNOWN	FAM	NFQ-MGB	27.781	26.1307
	CTR 1-1	UNC5B	UNKNOWN	FAM	NFQ-MGB	34.549	36.0431		CTR1-2	ANKRD1	UNKNOWN	FAM	NFQ-MGB	24.48	26.1307
	CTR 1-1	ID1	UNKNOWN	FAM	NFQ-MGB	28.784	28.0626		CTR2-1	HPRT1	UNKNOWN	VIC	NFQ-MGB	32.597	31.6395
	CTR 1-1	ID1	UNKNOWN	FAM	NFQ-MGB	27.341	28.0626		CTR2-1	HPRT1	UNKNOWN	VIC	NFQ-MGB	30.682	31.6395
	CTR 1-1	ID3	UNKNOWN	FAM	NFQ-MGB	29.012	27.9167		CTR2-1	CTGF	UNKNOWN	FAM	NFQ-MGB	23.828	22.7281
	CTR 1-1	ID3	UNKNOWN	FAM	NFQ-MGB	26.822	27.9167		CTR2-1	CTGF	UNKNOWN	FAM	NFQ-MGB	21.628	22.7281
	CTR 1-2	HPRT1	UNKNOWN	VIC	NFQ-MGB	32.373	31.6362		CTR2-1	CYR61	UNKNOWN	FAM	NFQ-MGB	25.46	24.5906
	CTR 1-2	HPRT1	UNKNOWN	VIC	NFQ-MGB	30.9	31.6362		CTR2-1	CYR61	UNKNOWN	FAM	NFQ-MGB	23.722	24.5906
	CTR 1-2	LFNG	UNKNOWN	FAM	NFQ-MGB	33.01	32.1362		CTR2-1	ANKRD1	UNKNOWN	FAM	NFQ-MGB	26.7	25.4124
	CTR 1-2	LFNG	UNKNOWN	FAM	NFQ-MGB	31.262	32.1362		CTR2-1	ANKRD1	UNKNOWN	FAM	NFQ-MGB	24.125	25.4124
	CTR 1-2	DLL4	UNKNOWN	FAM	NFQ-MGB	33.025	32.6814		CTR2-2	HPRT1	UNKNOWN	VIC	NFQ-MGB	33.111	32.1096
	CTR 1-2	DLL4	UNKNOWN	FAM	NFQ-MGB	32.338	32.6814		CTR2-2	HPRT1	UNKNOWN	VIC	NFQ-MGB	31.108	32.1096
	CTR 1-2	NRARP	UNKNOWN	FAM	NFQ-MGB	31.981	31.2944		CTR2-2	CTGF	UNKNOWN	FAM	NFQ-MGB	23.273	22.7293
	CTR 1-2	NRARP	UNKNOWN	FAM	NFQ-MGB	30.607	31.2944		CTR2-2	CTGF	UNKNOWN	FAM	NFQ-MGB	22.185	22.7293
	CTR 1-2	HES1	UNKNOWN	FAM	NFQ-MGB	34.115	33.1687		CTR2-2	CYR61	UNKNOWN	FAM	NFQ-MGB	27.21	26.0689
	CTR 1-2	HES1	UNKNOWN	FAM	NFQ-MGB	32.223	33.1687		CTR2-2	CYR61	UNKNOWN	FAM	NFQ-MGB	24.928	26.0689
	CTR 1-2	HEY1	UNKNOWN	FAM	NFQ-MGB	36.838	35.8399		CTR2-2	ANKRD1	UNKNOWN	FAM	NFQ-MGB	27.346	26.0933
	CTR 1-2	HEY1	UNKNOWN	FAM	NFQ-MGB	34.841	35.8399		CTR2-2	ANKRD1	UNKNOWN	FAM	NFQ-MGB	24.84	26.0933
	CTR 1-2	SMAD6	UNKNOWN	FAM	NFQ-MGB	34.436	34.0924		YT1-1	HPRT1	UNKNOWN	VIC	NFQ-MGB	32.352	31.0704
	CTR 1-2	SMAD6	UNKNOWN	FAM	NFQ-MGB	33.749	34.0924		YT1-1	HPRT1	UNKNOWN	VIC	NFQ-MGB	29.789	31.0704
	CTR 1-2	UNC5B	UNKNOWN	FAM	NFQ-MGB	36.245	35.7622		YT1-1	CTGF	UNKNOWN	FAM	NFQ-MGB	26.93	26.5074
	CTR 1-2	UNC5B	UNKNOWN	FAM	NFQ-MGB	35.279	35.7622		YT1-1	CTGF	UNKNOWN	FAM	NFQ-MGB	26.085	26.5074
	CTR 1-2	ID1	UNKNOWN	FAM	NFQ-MGB	28.848	28.2172		YT1-1	CYR61	UNKNOWN	FAM	NFQ-MGB	29.008	28.3193
	CTR 1-2	ID1	UNKNOWN	FAM	NFQ-MGB	27.586	28.2172		YT1-1	CYR61	UNKNOWN	FAM	NFQ-MGB	27.631	28.3193
	CTR 1-2	ID3	UNKNOWN	FAM	NFQ-MGB	28.399	27.7861		YT1-1	ANKRD1	UNKNOWN	FAM	NFQ-MGB	30.843	29.6151
	CTR 1-2	ID3	UNKNOWN	FAM	NFQ-MGB	27.173	27.7861		YT1-1	ANKRD1	UNKNOWN	FAM	NFQ-MGB	28.387	29.6151
	CTR2-1	HPRT1	UNKNOWN	VIC	NFQ-MGB	31.775	31.2601		YT1-2	HPRT1	UNKNOWN	VIC	NFQ-MGB	31.373	30.8738
	CTR2-1	HPRT1	UNKNOWN	VIC	NFQ-MGB	30.745	31.2601		YT1-2	HPRT1	UNKNOWN	VIC	NFQ-MGB	30.375	30.8738
	CTR2-1	LFNG	UNKNOWN	FAM	NFQ-MGB	31.65	31.1193		YT1-2	CTGF	UNKNOWN	FAM	NFQ-MGB	27.804	26.5473
	CTR2-1	LFNG	UNKNOWN	FAM	NFQ-MGB	30.589	31.1193		YT1-2	CTGF	UNKNOWN	FAM	NFQ-MGB	25.291	26.5473
	CTR2-1	DLL4	UNKNOWN	FAM	NFQ-MGB	33.156	32.0875		YT1-2	CYR61	UNKNOWN	FAM	NFQ-MGB	28.687	28.5228
	CTR2-1	DLL4	UNKNOWN	FAM	NFQ-MGB	31.019	32.0875		YT1-2	CYR61	UNKNOWN	FAM	NFQ-MGB	28.358	28.5228
	CTR2-1	NRARP	UNKNOWN	FAM	NFQ-MGB	31.969	30.7864		YT1-2	ANKRD1	UNKNOWN	FAM	NFQ-MGB	29.732	29.6574
	CTR2-1	NRARP	UNKNOWN	FAM	NFQ-MGB	29.604	30.7864		YT1-2	ANKRD1	UNKNOWN	FAM	NFQ-MGB	29.583	29.6574
	CTR2-1	HES1	UNKNOWN	FAM	NFQ-MGB	32.856	32.7723		YT2-1	HPRT1	UNKNOWN	VIC	NFQ-MGB	31.487	30.9313
	CTR2-1	HES1	UNKNOWN	FAM	NFQ-MGB	32.689	32.7723		YT2-1	HPRT1	UNKNOWN	VIC	NFQ-MGB	30.376	30.9313
	CTR2-1	HEY1	UNKNOWN	FAM	NFQ-MGB	35.545	34.6616		YT2-1	CTGF	UNKNOWN	FAM	NFQ-MGB	28.208	26.6928
	CTR2-1	HEY1	UNKNOWN	FAM	NFQ-MGB	33.778	34.6616		YT2-1	CTGF	UNKNOWN	FAM	NFQ-MGB	25.177	26.6928
	CTR2-1	SMAD6	UNKNOWN	FAM	NFQ-MGB	32.591	32.597		YT2-1	CYR61	UNKNOWN	FAM	NFQ-MGB	28.844	28.7238
	CTR2-1	SMAD6	UNKNOWN	FAM	NFQ-MGB	32.602	32.597		YT2-1	CYR61	UNKNOWN	FAM	NFQ-MGB	28.604	28.7238
	CTR2-1	UNC5B	UNKNOWN	FAM	NFQ-MGB	36.66	35.0436		YT2-1	ANKRD1	UNKNOWN	FAM	NFQ-MGB	30.157	29.69
	CTR2-1	UNC5B	UNKNOWN	FAM	NFQ-MGB	33.428	35.0436		YT2-1	ANKRD1	UNKNOWN	FAM	NFQ-MGB	29.223	29.69
	CTR2-1	ID1	UNKNOWN	FAM	NFQ-MGB	28.536	27.9285		YT2-2	HPRT1	UNKNOWN	VIC	NFQ-MGB	31.648	30.984
	CTR2-1	ID1	UNKNOWN	FAM	NFQ-MGB	27.321	27.9285		YT2-2	HPRT1	UNKNOWN	VIC	NFQ-MGB	30.32	30.984
	CTR2-1	ID3	UNKNOWN	FAM	NFQ-MGB	27.373	27.4093		YT2-2	CTGF	UNKNOWN	FAM	NFQ-MGB	25.946	25.6718
	CTR2-1	ID3	UNKNOWN	FAM	NFQ-MGB	27.445	27.4093		YT2-2	CTGF	UNKNOWN	FAM	NFQ-MGB	25.398	25.6718
	CTR2-2	HPRT1	UNKNOWN	VIC	NFQ-MGB	31.556	31.3121		YT2-2	CYR61	UNKNOWN	FAM	NFQ-MGB	28.596	28.472
	CTR2-2	HPRT1	UNKNOWN	VIC	NFQ-MGB	31.069	31.3121		YT2-2	CYR61	UNKNOWN	FAM	NFQ-MGB	28.348	28.472
	CTR2-2	LFNG	UNKNOWN	FAM	NFQ-MGB	32.598	31.6279		YT2-2	ANKRD1	UNKNOWN	FAM	NFQ-MGB	29.887	29.4344
	CTR2-2	LFNG	UNKNOWN	FAM	NFQ-MGB	30.657	31.6279		YT2-2	ANKRD1	UNKNOWN	FAM	NFQ-MGB	28.982	29.4344
	CTR2-2	DLL4	UNKNOWN	FAM	NFQ-MGB	33.115	32.1059
	CTR2-2	DLL4	UNKNOWN	FAM	NFQ-MGB	31.097	32.1059		Sample Name	Target Name	Task	Reporter	Quencher	CT	Ct Mean
	CTR2-2	NRARP	UNKNOWN	FAM	NFQ-MGB	31.832	30.817		SICTR SPARSE1	GAPDH	UNKNOWN	VIC	NFQ-MGB	29.285	27.8311
	CTR2-2	NRARP	UNKNOWN	FAM	NFQ-MGB	29.802	30.817		SICTR SPARSE2	GAPDH	UNKNOWN	VIC	NFQ-MGB	29.246	27.5383
	CTR2-2	HES1	UNKNOWN	FAM	NFQ-MGB	32.608	32.6116		SICTR SPARSE3	GAPDH	UNKNOWN	VIC	NFQ-MGB	29.869	26.9978
	CTR2-2	HES1	UNKNOWN	FAM	NFQ-MGB	32.615	32.6116		SIYT SPARSE1	GAPDH	UNKNOWN	VIC	NFQ-MGB	31.06	28.2847
	CTR2-2	HEY1	UNKNOWN	FAM	NFQ-MGB	34.192	34.3011		SIYT SPARSE2	GAPDH	UNKNOWN	VIC	NFQ-MGB	30.483	28.7843
	CTR2-2	HEY1	UNKNOWN	FAM	NFQ-MGB	34.411	34.3011		SIYT SPARSE3	GAPDH	UNKNOWN	VIC	NFQ-MGB	28.264	27.7785
	CTR2-2	SMAD6	UNKNOWN	FAM	NFQ-MGB	32.391	32.3401		SICTR SPARSE1	GAPDH	UNKNOWN	VIC	NFQ-MGB	29.066	27.8311
	CTR2-2	SMAD6	UNKNOWN	FAM	NFQ-MGB	32.289	32.3401		SICTR SPARSE2	GAPDH	UNKNOWN	VIC	NFQ-MGB	29.027	27.5383
	CTR2-2	UNC5B	UNKNOWN	FAM	NFQ-MGB	33.986	34.8669		SICTR SPARSE3	GAPDH	UNKNOWN	VIC	NFQ-MGB	27.14	26.9978
	CTR2-2	UNC5B	UNKNOWN	FAM	NFQ-MGB	35.748	34.8669		SIYT SPARSE1	GAPDH	UNKNOWN	VIC	NFQ-MGB	28.052	28.2847
	CTR2-2	ID1	UNKNOWN	FAM	NFQ-MGB	28.679	27.8792		SIYT SPARSE2	GAPDH	UNKNOWN	VIC	NFQ-MGB	29.588	28.7843
	CTR2-2	ID1	UNKNOWN	FAM	NFQ-MGB	27.079	27.8792		SIYT SPARSE3	GAPDH	UNKNOWN	VIC	NFQ-MGB	29.174	27.7785
	CTR2-2	ID3	UNKNOWN	FAM	NFQ-MGB	28.321	27.4208		SICTR SPARSE1	GAPDH	UNKNOWN	VIC	NFQ-MGB	25.142	27.8311
	CTR2-2	ID3	UNKNOWN	FAM	NFQ-MGB	26.521	27.4208		SICTR SPARSE2	GAPDH	UNKNOWN	VIC	NFQ-MGB	24.341	27.5383
	YT1-1	HPRT1	UNKNOWN	VIC	NFQ-MGB	31.892	30.8216		SICTR SPARSE3	GAPDH	UNKNOWN	VIC	NFQ-MGB	23.984	26.9978
	YT1-1	HPRT1	UNKNOWN	VIC	NFQ-MGB	29.751	30.8216		SIYT SPARSE1	GAPDH	UNKNOWN	VIC	NFQ-MGB	25.742	28.2847
	YT1-1	LFNG	UNKNOWN	FAM	NFQ-MGB	28.994	28.8046		SIYT SPARSE2	GAPDH	UNKNOWN	VIC	NFQ-MGB	26.282	28.7843
	YT1-1	LFNG	UNKNOWN	FAM	NFQ-MGB	28.615	28.8046		SIYT SPARSE3	GAPDH	UNKNOWN	VIC	NFQ-MGB	25.897	27.7785
	YT1-1	DLL4	UNKNOWN	FAM	NFQ-MGB	31.699	30.489		SICTR SPARSE1	BACTIN	UNKNOWN	VIC	NFQ-MGB	27.529	26.3892
	YT1-1	DLL4	UNKNOWN	FAM	NFQ-MGB	29.279	30.489		SICTR SPARSE2	BACTIN	UNKNOWN	VIC	NFQ-MGB	28.672	26.4303
	YT1-1	NRARP	UNKNOWN	FAM	NFQ-MGB	31.304	30.5586		SICTR SPARSE3	BACTIN	UNKNOWN	VIC	NFQ-MGB	26.256	25.4512
	YT1-1	NRARP	UNKNOWN	FAM	NFQ-MGB	29.813	30.5586		SIYT SPARSE1	BACTIN	UNKNOWN	VIC	NFQ-MGB	28.973	27.5889
	YT1-1	HES1	UNKNOWN	FAM	NFQ-MGB	32.708	32.1186		SIYT SPARSE2	BACTIN	UNKNOWN	VIC	NFQ-MGB	28.597	27.5386
	YT1-1	HES1	UNKNOWN	FAM	NFQ-MGB	31.53	32.1186		SIYT SPARSE3	BACTIN	UNKNOWN	VIC	NFQ-MGB	26.677	26.6065
	YT1-1	HEY1	UNKNOWN	FAM	NFQ-MGB	31.792	31.3254		SICTR SPARSE1	BACTIN	UNKNOWN	VIC	NFQ-MGB	27.648	26.3892
	YT1-1	HEY1	UNKNOWN	FAM	NFQ-MGB	30.858	31.3254		SICTR SPARSE2	BACTIN	UNKNOWN	VIC	NFQ-MGB	26.967	26.4303
	YT1-1	SMAD6	UNKNOWN	FAM	NFQ-MGB	26.067	27.8387		SICTR SPARSE3	BACTIN	UNKNOWN	VIC	NFQ-MGB	26.733	25.4512
	YT1-1	SMAD6	UNKNOWN	FAM	NFQ-MGB	29.61	27.8387		SIYT SPARSE1	BACTIN	UNKNOWN	VIC	NFQ-MGB	28.316	27.5889
	YT1-1	UNC5B	UNKNOWN	FAM	NFQ-MGB	33.947	32.7237		SIYT SPARSE2	BACTIN	UNKNOWN	VIC	NFQ-MGB	28.211	27.5386
	YT1-1	UNC5B	UNKNOWN	FAM	NFQ-MGB	31.5	32.7237		SIYT SPARSE3	BACTIN	UNKNOWN	VIC	NFQ-MGB	27.645	26.6065
	YT1-1	ID1	UNKNOWN	FAM	NFQ-MGB	26.788	26.0685		SICTR SPARSE1	BACTIN	UNKNOWN	VIC	NFQ-MGB	23.99	26.3892
	YT1-1	ID1	UNKNOWN	FAM	NFQ-MGB	25.349	26.0685		SICTR SPARSE2	BACTIN	UNKNOWN	VIC	NFQ-MGB	23.652	26.4303
	YT1-1	ID3	UNKNOWN	FAM	NFQ-MGB	26.858	26.0907		SICTR SPARSE3	BACTIN	UNKNOWN	VIC	NFQ-MGB	23.364	25.4512
	YT1-1	ID3	UNKNOWN	FAM	NFQ-MGB	25.323	26.0907		SIYT SPARSE1	BACTIN	UNKNOWN	VIC	NFQ-MGB	25.478	27.5889
	YT1-2	HPRT1	UNKNOWN	VIC	NFQ-MGB	32.453	30.968		SIYT SPARSE2	BACTIN	UNKNOWN	VIC	NFQ-MGB	25.808	27.5386
	YT1-2	HPRT1	UNKNOWN	VIC	NFQ-MGB	29.483	30.968		SIYT SPARSE3	BACTIN	UNKNOWN	VIC	NFQ-MGB	25.497	26.6065
	YT1-2	LFNG	UNKNOWN	FAM	NFQ-MGB	29.299	28.935		SICTR SPARSE1	CTGF	UNKNOWN	FAM	NFQ-MGB	25.262	24.6102
	YT1-2	LFNG	UNKNOWN	FAM	NFQ-MGB	28.571	28.935		SICTR SPARSE2	CTGF	UNKNOWN	FAM	NFQ-MGB	25.726	24.7631
	YT1-2	DLL4	UNKNOWN	FAM	NFQ-MGB	30.293	30.1274		SICTR SPARSE3	CTGF	UNKNOWN	FAM	NFQ-MGB	26.264	24.6905
	YT1-2	DLL4	UNKNOWN	FAM	NFQ-MGB	29.962	30.1274		SIYT SPARSE1	CTGF	UNKNOWN	FAM	NFQ-MGB	31.113	31.0113
	YT1-2	NRARP	UNKNOWN	FAM	NFQ-MGB	31.434	30.5843		SIYT SPARSE2	CTGF	UNKNOWN	FAM	NFQ-MGB	31.028	31.0396
	YT1-2	NRARP	UNKNOWN	FAM	NFQ-MGB	29.735	30.5843		SIYT SPARSE3	CTGF	UNKNOWN	FAM	NFQ-MGB	31.68	30.7251
	YT1-2	HES1	UNKNOWN	FAM	NFQ-MGB	31.923	31.9301		SICTR SPARSE1	CTGF	UNKNOWN	FAM	NFQ-MGB	25.687	24.6102
	YT1-2	HES1	UNKNOWN	FAM	NFQ-MGB	31.937	31.9301		SICTR SPARSE2	CTGF	UNKNOWN	FAM	NFQ-MGB	25.441	24.7631
	YT1-2	HEY1	UNKNOWN	FAM	NFQ-MGB	31.27	31.1747		SICTR SPARSE3	CTGF	UNKNOWN	FAM	NFQ-MGB	25.097	24.6905
	YT1-2	HEY1	UNKNOWN	FAM	NFQ-MGB	31.079	31.1747		SIYT SPARSE1	CTGF	UNKNOWN	FAM	NFQ-MGB	31.687	31.0113
	YT1-2	SMAD6	UNKNOWN	FAM	NFQ-MGB	31.24	30.6597		SIYT SPARSE2	CTGF	UNKNOWN	FAM	NFQ-MGB	31.984	31.0396
	YT1-2	SMAD6	UNKNOWN	FAM	NFQ-MGB	30.08	30.6597		SIYT SPARSE3	CTGF	UNKNOWN	FAM	NFQ-MGB	31.357	30.7251
	YT1-2	UNC5B	UNKNOWN	FAM	NFQ-MGB	33.588	32.508		SICTR SPARSE1	CTGF	UNKNOWN	FAM	NFQ-MGB	22.882	24.6102
	YT1-2	UNC5B	UNKNOWN	FAM	NFQ-MGB	31.428	32.508		SICTR SPARSE2	CTGF	UNKNOWN	FAM	NFQ-MGB	23.122	24.7631
	YT1-2	ID1	UNKNOWN	FAM	NFQ-MGB	26.759	26.2042		SICTR SPARSE3	CTGF	UNKNOWN	FAM	NFQ-MGB	22.71	24.6905
	YT1-2	ID1	UNKNOWN	FAM	NFQ-MGB	25.65	26.2042		SIYT SPARSE1	CTGF	UNKNOWN	FAM	NFQ-MGB	30.234	31.0113
	YT1-2	ID3	UNKNOWN	FAM	NFQ-MGB	26.65	26.2605		SIYT SPARSE2	CTGF	UNKNOWN	FAM	NFQ-MGB	30.107	31.0396
	YT1-2	ID3	UNKNOWN	FAM	NFQ-MGB	25.871	26.2605		SIYT SPARSE3	CTGF	UNKNOWN	FAM	NFQ-MGB	29.139	30.7251
	YT2-1	HPRT1	UNKNOWN	VIC	NFQ-MGB	31.841	30.8611
	YT2-1	HPRT1	UNKNOWN	VIC	NFQ-MGB	29.881	30.8611		Sample Name	Target Name	Task	Reporter	Quencher	CT	Ct Mean
	YT2-1	LFNG	UNKNOWN	FAM	NFQ-MGB	29.108	29.0357		SICTR SP1	HPRT1	UNKNOWN	VIC	NFQ-MGB	31.088	31.0746
	YT2-1	LFNG	UNKNOWN	FAM	NFQ-MGB	28.963	29.0357		SICTR SP2	HPRT1	UNKNOWN	VIC	NFQ-MGB	30.978	30.9252
	YT2-1	DLL4	UNKNOWN	FAM	NFQ-MGB	30.072	30.1003		SICTR SP3	HPRT1	UNKNOWN	VIC	NFQ-MGB	31.235	31.2919
	YT2-1	DLL4	UNKNOWN	FAM	NFQ-MGB	30.129	30.1003		SIYT SP1	HPRT1	UNKNOWN	VIC	NFQ-MGB	31.933	31.9421
	YT2-1	NRARP	UNKNOWN	FAM	NFQ-MGB	30.515	30.4781		SIYT SP2	HPRT1	UNKNOWN	VIC	NFQ-MGB	31.887	31.7868
	YT2-1	NRARP	UNKNOWN	FAM	NFQ-MGB	30.442	30.4781		SIYT SP3	HPRT1	UNKNOWN	VIC	NFQ-MGB	31.806	31.7617
	YT2-1	HES1	UNKNOWN	FAM	NFQ-MGB	32.934	32.1918		SICTR SP1	HPRT1	UNKNOWN	VIC	NFQ-MGB	31.061	31.0746
	YT2-1	HES1	UNKNOWN	FAM	NFQ-MGB	31.45	32.1918		SICTR SP2	HPRT1	UNKNOWN	VIC	NFQ-MGB	30.872	30.9252
	YT2-1	HEY1	UNKNOWN	FAM	NFQ-MGB	31.81	30.9953		SICTR SP3	HPRT1	UNKNOWN	VIC	NFQ-MGB	31.348	31.2919
	YT2-1	HEY1	UNKNOWN	FAM	NFQ-MGB	30.18	30.9953		SIYT SP1	HPRT1	UNKNOWN	VIC	NFQ-MGB	31.951	31.9421
	YT2-1	SMAD6	UNKNOWN	FAM	NFQ-MGB	31.719	30.7416		SIYT SP2	HPRT1	UNKNOWN	VIC	NFQ-MGB	31.687	31.7868
	YT2-1	SMAD6	UNKNOWN	FAM	NFQ-MGB	29.764	30.7416		SIYT SP3	HPRT1	UNKNOWN	VIC	NFQ-MGB	31.718	31.7617
	YT2-1	UNC5B	UNKNOWN	FAM	NFQ-MGB	33.83	32.6165		SICTR SP1	CYR61	UNKNOWN	FAM	NFQ-MGB	25.943	25.9266
	YT2-1	UNC5B	UNKNOWN	FAM	NFQ-MGB	31.403	32.6165		SICTR SP2	CYR61	UNKNOWN	FAM	NFQ-MGB	25.957	25.9486
	YT2-1	ID1	UNKNOWN	FAM	NFQ-MGB	27.382	26.4163		SICTR SP3	CYR61	UNKNOWN	FAM	NFQ-MGB	26.034	26.0047
	YT2-1	ID1	UNKNOWN	FAM	NFQ-MGB	25.45	26.4163		SIYT SP1	CYR61	UNKNOWN	FAM	NFQ-MGB	31.955	31.9146
	YT2-1	ID3	UNKNOWN	FAM	NFQ-MGB	26.499	25.8048		SIYT SP2	CYR61	UNKNOWN	FAM	NFQ-MGB	31.279	31.5114
	YT2-1	ID3	UNKNOWN	FAM	NFQ-MGB	25.111	25.8048		SIYT SP3	CYR61	UNKNOWN	FAM	NFQ-MGB	31.462	31.5062
	YT2-2	HPRT1	UNKNOWN	VIC	NFQ-MGB	32.13	31.2561		SICTR SP1	CYR61	UNKNOWN	FAM	NFQ-MGB	25.91	25.9266
	YT2-2	HPRT1	UNKNOWN	VIC	NFQ-MGB	30.383	31.2561		SICTR SP2	CYR61	UNKNOWN	FAM	NFQ-MGB	25.941	25.9486
	YT2-2	LFNG	UNKNOWN	FAM	NFQ-MGB	29.723	28.9104		SICTR SP3	CYR61	UNKNOWN	FAM	NFQ-MGB	25.976	26.0047
	YT2-2	LFNG	UNKNOWN	FAM	NFQ-MGB	28.098	28.9104		SIYT SP1	CYR61	UNKNOWN	FAM	NFQ-MGB	31.874	31.9146
	YT2-2	DLL4	UNKNOWN	FAM	NFQ-MGB	31.073	30.1109		SIYT SP2	CYR61	UNKNOWN	FAM	NFQ-MGB	31.743	31.5114
	YT2-2	DLL4	UNKNOWN	FAM	NFQ-MGB	29.149	30.1109		SIYT SP3	CYR61	UNKNOWN	FAM	NFQ-MGB	31.55	31.5062
	YT2-2	NRARP	UNKNOWN	FAM	NFQ-MGB	30.121	30.0904		SICTR SP1	ANKRD1	UNKNOWN	FAM	NFQ-MGB	25.148	25.1073
	YT2-2	NRARP	UNKNOWN	FAM	NFQ-MGB	30.06	30.0904		SICTR SP2	ANKRD1	UNKNOWN	FAM	NFQ-MGB	25.993	25.9831
	YT2-2	HES1	UNKNOWN	FAM	NFQ-MGB	32.402	31.6899		SICTR SP3	ANKRD1	UNKNOWN	FAM	NFQ-MGB	25.842	25.8057
	YT2-2	HES1	UNKNOWN	FAM	NFQ-MGB	30.978	31.6899		SIYT SP1	ANKRD1	UNKNOWN	FAM	NFQ-MGB	33.027	33.2461
	YT2-2	HEY1	UNKNOWN	FAM	NFQ-MGB	31.111	30.7686		SIYT SP2	ANKRD1	UNKNOWN	FAM	NFQ-MGB	32.645	32.7007
	YT2-2	HEY1	UNKNOWN	FAM	NFQ-MGB	30.427	30.7686		SIYT SP3	ANKRD1	UNKNOWN	FAM	NFQ-MGB	33.446	33.4859
	YT2-2	SMAD6	UNKNOWN	FAM	NFQ-MGB	31.824	30.8387		SICTR SP1	ANKRD1	UNKNOWN	FAM	NFQ-MGB	25.066	25.1073
	YT2-2	SMAD6	UNKNOWN	FAM	NFQ-MGB	29.854	30.8387		SICTR SP2	ANKRD1	UNKNOWN	FAM	NFQ-MGB	25.973	25.9831
	YT2-2	UNC5B	UNKNOWN	FAM	NFQ-MGB	31.999	31.9223		SICTR SP3	ANKRD1	UNKNOWN	FAM	NFQ-MGB	25.769	25.8057
	YT2-2	UNC5B	UNKNOWN	FAM	NFQ-MGB	31.845	31.9223		SIYT SP1	ANKRD1	UNKNOWN	FAM	NFQ-MGB	33.465	33.2461
	YT2-2	ID1	UNKNOWN	FAM	NFQ-MGB	26.747	26.0479		SIYT SP2	ANKRD1	UNKNOWN	FAM	NFQ-MGB	32.756	32.7007
	YT2-2	ID1	UNKNOWN	FAM	NFQ-MGB	25.348	26.0479		SIYT SP3	ANKRD1	UNKNOWN	FAM	NFQ-MGB	33.526	33.4859
	YT2-2	ID3	UNKNOWN	FAM	NFQ-MGB	25.905	25.6324
	YT2-2	ID3	UNKNOWN	FAM	NFQ-MGB	25.36	25.6324
									Sample Name	Target Name	Task	Reporter	Quencher	CT	Ct Mean
	Sample Name	Target Name	Task	Reporter	Quencher	CT	Ct Mean		siC s1	GAPDH	UNKNOWN	VIC	NFQ-MGB	28.814	28.4467
	siCtr s1	GAPDH	UNKNOWN	VIC	NFQ-MGB	27.266	27.0116		siC s2	GAPDH	UNKNOWN	VIC	NFQ-MGB	28.23	28.1881
	siCtr s2	GAPDH	UNKNOWN	VIC	NFQ-MGB	26.697	26.5255		siC s3	GAPDH	UNKNOWN	VIC	NFQ-MGB	28.778	28.5914
	siCtr s3	GAPDH	UNKNOWN	VIC	NFQ-MGB	27.158	27.0898		siYT s1	GAPDH	UNKNOWN	VIC	NFQ-MGB	29.59	29.4398
	siYT s1	GAPDH	UNKNOWN	VIC	NFQ-MGB	27.495	27.3704		siYT s2	GAPDH	UNKNOWN	VIC	NFQ-MGB	29.214	29.2483
	siYT s2	GAPDH	UNKNOWN	VIC	NFQ-MGB	27.588	27.6188		siYT s3	GAPDH	UNKNOWN	VIC	NFQ-MGB	28.413	28.2171
	siYT s3	GAPDH	UNKNOWN	VIC	NFQ-MGB	27.313	27.2871		siC s1	GAPDH	UNKNOWN	VIC	NFQ-MGB	28.08	28.4467
	siCtr s1	GAPDH	UNKNOWN	VIC	NFQ-MGB	26.757	27.0116		siC s2	GAPDH	UNKNOWN	VIC	NFQ-MGB	28.146	28.1881
	siCtr s2	GAPDH	UNKNOWN	VIC	NFQ-MGB	26.354	26.5255		siC s3	GAPDH	UNKNOWN	VIC	NFQ-MGB	28.404	28.5914
	siCtr s3	GAPDH	UNKNOWN	VIC	NFQ-MGB	27.021	27.0898		siYT s1	GAPDH	UNKNOWN	VIC	NFQ-MGB	29.29	29.4398
	siYT s1	GAPDH	UNKNOWN	VIC	NFQ-MGB	27.245	27.3704		siYT s2	GAPDH	UNKNOWN	VIC	NFQ-MGB	29.283	29.2483
	siYT s2	GAPDH	UNKNOWN	VIC	NFQ-MGB	27.649	27.6188		siYT s3	GAPDH	UNKNOWN	VIC	NFQ-MGB	28.491	28.2171
	siYT s3	GAPDH	UNKNOWN	VIC	NFQ-MGB	27.261	27.2871		siC s1	bACTIN	UNKNOWN	VIC	NFQ-MGB	28.296	28.1409
	siCtr s1	bACTIN	UNKNOWN	VIC	NFQ-MGB	26.156	26.0832		siC s2	bACTIN	UNKNOWN	VIC	NFQ-MGB	28.339	28.2327
	siCtr s2	bACTIN	UNKNOWN	VIC	NFQ-MGB	25.987	25.9016		siC s3	bACTIN	UNKNOWN	VIC	NFQ-MGB	28.32	28.0496
	siCtr s3	bACTIN	UNKNOWN	VIC	NFQ-MGB	26.874	26.7344		siYT s1	bACTIN	UNKNOWN	VIC	NFQ-MGB	29.275	29.2023
	siYT s1	bACTIN	UNKNOWN	VIC	NFQ-MGB	27.245	27.0877		siYT s2	bACTIN	UNKNOWN	VIC	NFQ-MGB	28.715	28.6384
	siYT s2	bACTIN	UNKNOWN	VIC	NFQ-MGB	27.499	27.3968		siYT s3	bACTIN	UNKNOWN	VIC	NFQ-MGB	28.484	28.2741
	siYT s3	bACTIN	UNKNOWN	VIC	NFQ-MGB	27.717	27.6438		siC s1	bACTIN	UNKNOWN	VIC	NFQ-MGB	27.985	28.1409
	siCtr s1	bACTIN	UNKNOWN	VIC	NFQ-MGB	26.01	26.0832		siC s2	bACTIN	UNKNOWN	VIC	NFQ-MGB	28.126	28.2327
	siCtr s2	bACTIN	UNKNOWN	VIC	NFQ-MGB	25.816	25.9016		siC s3	bACTIN	UNKNOWN	VIC	NFQ-MGB	27.779	28.0496
	siCtr s3	bACTIN	UNKNOWN	VIC	NFQ-MGB	26.595	26.7344		siYT s1	bACTIN	UNKNOWN	VIC	NFQ-MGB	29.13	29.2023
	siYT s1	bACTIN	UNKNOWN	VIC	NFQ-MGB	26.93	27.0877		siYT s2	bACTIN	UNKNOWN	VIC	NFQ-MGB	28.562	28.6384
	siYT s2	bACTIN	UNKNOWN	VIC	NFQ-MGB	27.295	27.3968		siYT s3	bACTIN	UNKNOWN	VIC	NFQ-MGB	28.362	28.2741
	siYT s3	bACTIN	UNKNOWN	VIC	NFQ-MGB	27.571	27.6438		siC s1	ID1	UNKNOWN	FAM	NFQ-MGB	30.382	30.2438
	siCtr s1	SMAD6	UNKNOWN	FAM	NFQ-MGB	33.748	33.7407		siC s2	ID1	UNKNOWN	FAM	NFQ-MGB	31.016	30.6893
	siCtr s2	SMAD6	UNKNOWN	FAM	NFQ-MGB	34.323	34.227		siC s3	ID1	UNKNOWN	FAM	NFQ-MGB	31.081	30.8198
	siCtr s3	SMAD6	UNKNOWN	FAM	NFQ-MGB	35.009	34.5226		siYT s1	ID1	UNKNOWN	FAM	NFQ-MGB	31.862	31.6388
	siYT s1	SMAD6	UNKNOWN	FAM	NFQ-MGB	32.934	32.9502		siYT s2	ID1	UNKNOWN	FAM	NFQ-MGB	31.269	31.0882
	siYT s2	SMAD6	UNKNOWN	FAM	NFQ-MGB	32.77	32.8364		siYT s3	ID1	UNKNOWN	FAM	NFQ-MGB	31.183	30.8067
	siYT s3	SMAD6	UNKNOWN	FAM	NFQ-MGB	32.8	32.8366		siC s1	ID1	UNKNOWN	FAM	NFQ-MGB	30.105	30.2438
	siCtr s1	SMAD6	UNKNOWN	FAM	NFQ-MGB	33.733	33.7407		siC s2	ID1	UNKNOWN	FAM	NFQ-MGB	30.362	30.6893
	siCtr s2	SMAD6	UNKNOWN	FAM	NFQ-MGB	34.131	34.227		siC s3	ID1	UNKNOWN	FAM	NFQ-MGB	30.559	30.8198
	siCtr s3	SMAD6	UNKNOWN	FAM	NFQ-MGB	34.036	34.5226		siYT s1	ID1	UNKNOWN	FAM	NFQ-MGB	31.416	31.6388
	siYT s1	SMAD6	UNKNOWN	FAM	NFQ-MGB	32.967	32.9502		siYT s2	ID1	UNKNOWN	FAM	NFQ-MGB	30.908	31.0882
	siYT s2	SMAD6	UNKNOWN	FAM	NFQ-MGB	32.903	32.8364		siYT s3	ID1	UNKNOWN	FAM	NFQ-MGB	30.867	30.8067
	siYT s3	SMAD6	UNKNOWN	FAM	NFQ-MGB	32.874	32.8366
	siCtr s1	ID3	UNKNOWN	FAM	NFQ-MGB	29.795	29.6558
	siCtr s2	ID3	UNKNOWN	FAM	NFQ-MGB	29.779	29.6788
	siCtr s3	ID3	UNKNOWN	FAM	NFQ-MGB	30.18	30.6362
	siYT s1	ID3	UNKNOWN	FAM	NFQ-MGB	30.784	30.597
	siYT s2	ID3	UNKNOWN	FAM	NFQ-MGB	30.77	30.6056
	siYT s3	ID3	UNKNOWN	FAM	NFQ-MGB	30.974	30.9363
	siCtr s1	ID3	UNKNOWN	FAM	NFQ-MGB	29.517	29.6558
	siCtr s2	ID3	UNKNOWN	FAM	NFQ-MGB	29.578	29.6788
	siCtr s3	ID3	UNKNOWN	FAM	NFQ-MGB	31.092	30.18
	siYT s1	ID3	UNKNOWN	FAM	NFQ-MGB	30.41	30.597
	siYT s2	ID3	UNKNOWN	FAM	NFQ-MGB	30.441	30.6056
	siYT s3	ID3	UNKNOWN	FAM	NFQ-MGB	30.899	30.9363
	Sample Name	Target Name	Task	Reporter	Quencher	CT	Ct Mean
	SICTR SPARSE1	GAPDH	UNKNOWN	VIC	NFQ-MGB	29.285	27.8311
	SICTR SPARSE2	GAPDH	UNKNOWN	VIC	NFQ-MGB	29.246	27.5383
	SICTR SPARSE3	GAPDH	UNKNOWN	VIC	NFQ-MGB	29.869	26.9978
	SIYT SPARSE1	GAPDH	UNKNOWN	VIC	NFQ-MGB	31.06	28.2847
	SIYT SPARSE2	GAPDH	UNKNOWN	VIC	NFQ-MGB	30.483	28.7843
	SIYT SPARSE3	GAPDH	UNKNOWN	VIC	NFQ-MGB	28.264	27.7785
	SICTR SPARSE1	DLL4	UNKNOWN	FAM	NFQ-MGB	34.348	32.9518
	SICTR SPARSE2	DLL4	UNKNOWN	FAM	NFQ-MGB	35.016	33.4558
	SICTR SPARSE3	DLL4	UNKNOWN	FAM	NFQ-MGB	33.663	32.5682
	SIYT SPARSE1	DLL4	UNKNOWN	FAM	NFQ-MGB	34.909	33.6305
	SIYT SPARSE2	DLL4	UNKNOWN	FAM	NFQ-MGB	33.95	32.7022
	SIYT SPARSE3	DLL4	UNKNOWN	FAM	NFQ-MGB	31.505	30.9082
	SICTR SPARSE1	GAPDH	UNKNOWN	VIC	NFQ-MGB	29.066	27.8311
	SICTR SPARSE2	GAPDH	UNKNOWN	VIC	NFQ-MGB	29.027	27.5383
	SICTR SPARSE3	GAPDH	UNKNOWN	VIC	NFQ-MGB	27.14	26.9978
	SIYT SPARSE1	GAPDH	UNKNOWN	VIC	NFQ-MGB	28.052	28.2847
	SIYT SPARSE2	GAPDH	UNKNOWN	VIC	NFQ-MGB	29.588	28.7843
	SIYT SPARSE3	GAPDH	UNKNOWN	VIC	NFQ-MGB	29.174	27.7785
	SICTR SPARSE1	DLL4	UNKNOWN	FAM	NFQ-MGB	32.846	32.9518
	SICTR SPARSE2	DLL4	UNKNOWN	FAM	NFQ-MGB	33.37	33.4558
	SICTR SPARSE3	DLL4	UNKNOWN	FAM	NFQ-MGB	32.57	32.5682
	SIYT SPARSE1	DLL4	UNKNOWN	FAM	NFQ-MGB	33.425	33.6305
	SIYT SPARSE2	DLL4	UNKNOWN	FAM	NFQ-MGB	32.556	32.7022
	SIYT SPARSE3	DLL4	UNKNOWN	FAM	NFQ-MGB	30.954	30.9082
	SICTR SPARSE1	GAPDH	UNKNOWN	VIC	NFQ-MGB	25.142	27.8311
	SICTR SPARSE2	GAPDH	UNKNOWN	VIC	NFQ-MGB	24.341	27.5383
	SICTR SPARSE3	GAPDH	UNKNOWN	VIC	NFQ-MGB	23.984	26.9978
	SIYT SPARSE1	GAPDH	UNKNOWN	VIC	NFQ-MGB	25.742	28.2847
	SIYT SPARSE2	GAPDH	UNKNOWN	VIC	NFQ-MGB	26.282	28.7843
	SIYT SPARSE3	GAPDH	UNKNOWN	VIC	NFQ-MGB	25.897	27.7785
	SICTR SPARSE1	DLL4	UNKNOWN	FAM	NFQ-MGB	31.661	32.9518
	SICTR SPARSE2	DLL4	UNKNOWN	FAM	NFQ-MGB	31.981	33.4558
	SICTR SPARSE3	DLL4	UNKNOWN	FAM	NFQ-MGB	31.472	32.5682
	SIYT SPARSE1	DLL4	UNKNOWN	FAM	NFQ-MGB	32.558	33.6305
	SIYT SPARSE2	DLL4	UNKNOWN	FAM	NFQ-MGB	31.6	32.7022
	SIYT SPARSE3	DLL4	UNKNOWN	FAM	NFQ-MGB	30.265	30.9082
	SICTR SPARSE1	BACTIN	UNKNOWN	VIC	NFQ-MGB	27.529	26.3892
	SICTR SPARSE2	BACTIN	UNKNOWN	VIC	NFQ-MGB	28.672	26.4303
	SICTR SPARSE3	BACTIN	UNKNOWN	VIC	NFQ-MGB	26.256	25.4512
	SIYT SPARSE1	BACTIN	UNKNOWN	VIC	NFQ-MGB	28.973	27.5889
	SIYT SPARSE2	BACTIN	UNKNOWN	VIC	NFQ-MGB	28.597	27.5386
	SIYT SPARSE3	BACTIN	UNKNOWN	VIC	NFQ-MGB	26.677	26.6065
	SICTR SPARSE1	BACTIN	UNKNOWN	VIC	NFQ-MGB	27.648	26.3892
	SICTR SPARSE2	BACTIN	UNKNOWN	VIC	NFQ-MGB	26.967	26.4303
	SICTR SPARSE3	BACTIN	UNKNOWN	VIC	NFQ-MGB	26.733	25.4512
	SIYT SPARSE1	BACTIN	UNKNOWN	VIC	NFQ-MGB	28.316	27.5889
	SIYT SPARSE2	BACTIN	UNKNOWN	VIC	NFQ-MGB	28.211	27.5386
	SIYT SPARSE3	BACTIN	UNKNOWN	VIC	NFQ-MGB	27.645	26.6065
	SICTR SPARSE1	BACTIN	UNKNOWN	VIC	NFQ-MGB	23.99	26.3892
	SICTR SPARSE2	BACTIN	UNKNOWN	VIC	NFQ-MGB	23.652	26.4303
	SICTR SPARSE3	BACTIN	UNKNOWN	VIC	NFQ-MGB	23.364	25.4512
	SIYT SPARSE1	BACTIN	UNKNOWN	VIC	NFQ-MGB	25.478	27.5889
	SIYT SPARSE2	BACTIN	UNKNOWN	VIC	NFQ-MGB	25.808	27.5386
	SIYT SPARSE3	BACTIN	UNKNOWN	VIC	NFQ-MGB	25.497	26.6065
	SICTR SPARSE1	HEY1	UNKNOWN	FAM	NFQ-MGB	36.749	35.5144
	SICTR SPARSE2	HEY1	UNKNOWN	FAM	NFQ-MGB	38.909	36.1552
	SICTR SPARSE3	HEY1	UNKNOWN	FAM	NFQ-MGB	36.113	35.1227
	SIYT SPARSE1	HEY1	UNKNOWN	FAM	NFQ-MGB	34.36	33.4333
	SIYT SPARSE2	HEY1	UNKNOWN	FAM	NFQ-MGB	33.487	32.7684
	SIYT SPARSE3	HEY1	UNKNOWN	FAM	NFQ-MGB	33.588	33.4866
	SICTR SPARSE1	HEY1	UNKNOWN	FAM	NFQ-MGB	35.803	35.5144
	SICTR SPARSE2	HEY1	UNKNOWN	FAM	NFQ-MGB	35.477	36.1552
	SICTR SPARSE3	HEY1	UNKNOWN	FAM	NFQ-MGB	35.572	35.1227
	SIYT SPARSE1	HEY1	UNKNOWN	FAM	NFQ-MGB	33.721	33.4333
	SIYT SPARSE2	HEY1	UNKNOWN	FAM	NFQ-MGB	32.91	32.7684
	SIYT SPARSE3	HEY1	UNKNOWN	FAM	NFQ-MGB	34.44	33.4866
	SICTR SPARSE1	HEY1	UNKNOWN	FAM	NFQ-MGB	33.991	35.5144
	SICTR SPARSE2	HEY1	UNKNOWN	FAM	NFQ-MGB	34.079	36.1552
	SICTR SPARSE3	HEY1	UNKNOWN	FAM	NFQ-MGB	33.683	35.1227
	SIYT SPARSE1	HEY1	UNKNOWN	FAM	NFQ-MGB	32.219	33.4333
	SIYT SPARSE2	HEY1	UNKNOWN	FAM	NFQ-MGB	31.909	32.7684
	SIYT SPARSE3	HEY1	UNKNOWN	FAM	NFQ-MGB	32.432	33.4866
	SICTR SPARSE1	NRARP1	UNKNOWN	FAM	NFQ-MGB	32.791	31.4613
	SICTR SPARSE2	NRARP1	UNKNOWN	FAM	NFQ-MGB	32.99	31.3407
	SICTR SPARSE3	NRARP1	UNKNOWN	FAM	NFQ-MGB	32.06	31.1051
	SIYT SPARSE1	NRARP1	UNKNOWN	FAM	NFQ-MGB	33.744	33.4
	SIYT SPARSE2	NRARP1	UNKNOWN	FAM	NFQ-MGB	34.018	33.6128
	SIYT SPARSE3	NRARP1	UNKNOWN	FAM	NFQ-MGB	33.052	32.7125
	SICTR SPARSE1	NRARP1	UNKNOWN	FAM	NFQ-MGB	31.407	31.4613
	SICTR SPARSE2	NRARP1	UNKNOWN	FAM	NFQ-MGB	31.372	31.3407
	SICTR SPARSE3	NRARP1	UNKNOWN	FAM	NFQ-MGB	31.209	31.1051
	SIYT SPARSE1	NRARP1	UNKNOWN	FAM	NFQ-MGB	33.76	33.4
	SIYT SPARSE2	NRARP1	UNKNOWN	FAM	NFQ-MGB	34.139	33.6128
	SIYT SPARSE3	NRARP1	UNKNOWN	FAM	NFQ-MGB	33.175	32.7125
	SICTR SPARSE1	NRARP1	UNKNOWN	FAM	NFQ-MGB	30.185	31.4613
	SICTR SPARSE2	NRARP1	UNKNOWN	FAM	NFQ-MGB	29.66	31.3407
	SICTR SPARSE3	NRARP1	UNKNOWN	FAM	NFQ-MGB	30.046	31.1051
	SIYT SPARSE1	NRARP1	UNKNOWN	FAM	NFQ-MGB	32.696	33.4
	SIYT SPARSE2	NRARP1	UNKNOWN	FAM	NFQ-MGB	32.682	33.6128
	SIYT SPARSE3	NRARP1	UNKNOWN	FAM	NFQ-MGB	31.911	32.7125
	SICTR SPARSE1	LNFG	UNKNOWN	FAM	NFQ-MGB	33.469	32.1976
	SICTR SPARSE2	LNFG	UNKNOWN	FAM	NFQ-MGB	33.955	32.7089
	SICTR SPARSE3	LNFG	UNKNOWN	FAM	NFQ-MGB	33.389	32.4431
	SIYT SPARSE1	LNFG	UNKNOWN	FAM	NFQ-MGB	32.218	31.2794
	SIYT SPARSE2	LNFG	UNKNOWN	FAM	NFQ-MGB	32.109	31.242
	SIYT SPARSE3	LNFG	UNKNOWN	FAM	NFQ-MGB	31.78	30.793
	SICTR SPARSE1	LNFG	UNKNOWN	FAM	NFQ-MGB	32.035	32.1976
	SICTR SPARSE2	LNFG	UNKNOWN	FAM	NFQ-MGB	33.151	32.7089
	SICTR SPARSE3	LNFG	UNKNOWN	FAM	NFQ-MGB	32.481	32.4431
	SIYT SPARSE1	LNFG	UNKNOWN	FAM	NFQ-MGB	31.676	31.2794
	SIYT SPARSE2	LNFG	UNKNOWN	FAM	NFQ-MGB	31.436	31.242
	SIYT SPARSE3	LNFG	UNKNOWN	FAM	NFQ-MGB	30.912	30.793
	SICTR SPARSE1	LNFG	UNKNOWN	FAM	NFQ-MGB	31.089	32.1976
	SICTR SPARSE2	LNFG	UNKNOWN	FAM	NFQ-MGB	31.021	32.7089
	SICTR SPARSE3	LNFG	UNKNOWN	FAM	NFQ-MGB	31.46	32.4431
	SIYT SPARSE1	LNFG	UNKNOWN	FAM	NFQ-MGB	29.944	31.2794
	SIYT SPARSE2	LNFG	UNKNOWN	FAM	NFQ-MGB	30.181	31.242
	SIYT SPARSE3	LNFG	UNKNOWN	FAM	NFQ-MGB	29.687	30.793
	Sample Name	Target Name	Task	Reporter	Quencher	CT	Ct Mean
	SIcTR S1	HPRT1	UNKNOWN	VIC	NFQ-MGB	30.877	30.0993
	SIcTR S2	HPRT1	UNKNOWN	VIC	NFQ-MGB	31.836	31.1947
	SIcTR S3	HPRT1	UNKNOWN	VIC	NFQ-MGB	31.928	30.8882
	SIYT S1	HPRT1	UNKNOWN	VIC	NFQ-MGB	31.565	31.387
	SIYT S2	HPRT1	UNKNOWN	VIC	NFQ-MGB	32.312	31.4135
	SIYT S3	HPRT1	UNKNOWN	VIC	NFQ-MGB	32.214	30.5967
	SIcTR S1	HPRT1	UNKNOWN	VIC	NFQ-MGB	29.322	30.0993
	SIcTR S2	HPRT1	UNKNOWN	VIC	NFQ-MGB	30.553	31.1947
	SIcTR S3	HPRT1	UNKNOWN	VIC	NFQ-MGB	29.849	30.8882
	SIYT S1	HPRT1	UNKNOWN	VIC	NFQ-MGB	31.209	31.387
	SIYT S2	HPRT1	UNKNOWN	VIC	NFQ-MGB	30.515	31.4135
	SIYT S3	HPRT1	UNKNOWN	VIC	NFQ-MGB	28.979	30.5967
	SIYT D1	HPRT1	UNKNOWN	VIC	NFQ-MGB	30.745	31.8166
	SIYT D2	HPRT1	UNKNOWN	VIC	NFQ-MGB	30.257	31.449
	SIYT D3	HPRT1	UNKNOWN	VIC	NFQ-MGB	30.397	31.7807
	SIcTR S1	UNC5B	UNKNOWN	FAM	NFQ-MGB	35.37	35.4964
	SIcTR S2	UNC5B	UNKNOWN	FAM	NFQ-MGB	36.717	36.4168
	SIcTR S3	UNC5B	UNKNOWN	FAM	NFQ-MGB	Undetermined	37.075
	SIYT S1	UNC5B	UNKNOWN	FAM	NFQ-MGB	37.592	36.5998
	SIYT S2	UNC5B	UNKNOWN	FAM	NFQ-MGB	34.692	33.6461
	SIYT S3	UNC5B	UNKNOWN	FAM	NFQ-MGB	32.882	33.4
	SIcTR S1	UNC5B	UNKNOWN	FAM	NFQ-MGB	35.623	35.4964
	SIcTR S2	UNC5B	UNKNOWN	FAM	NFQ-MGB	36.117	36.4168
	SIcTR S3	UNC5B	UNKNOWN	FAM	NFQ-MGB	37.075	37.075
	SIYT S1	UNC5B	UNKNOWN	FAM	NFQ-MGB	35.608	36.5998
	SIYT S2	UNC5B	UNKNOWN	FAM	NFQ-MGB	32.6	33.6461
	SIYT S3	UNC5B	UNKNOWN	FAM	NFQ-MGB	33.918	33.4
	Sample Name	Target Name	Task	Reporter	Quencher	CT	Ct Mean
	SICTR SP1	HPRT1	UNKNOWN	VIC	NFQ-MGB	31.088	31.0746
	SICTR SP2	HPRT1	UNKNOWN	VIC	NFQ-MGB	30.978	30.9252
	SICTR SP3	HPRT1	UNKNOWN	VIC	NFQ-MGB	31.235	31.2919
	SIYT SP1	HPRT1	UNKNOWN	VIC	NFQ-MGB	31.933	31.9421
	SIYT SP2	HPRT1	UNKNOWN	VIC	NFQ-MGB	31.887	31.7868
	SIYT SP3	HPRT1	UNKNOWN	VIC	NFQ-MGB	31.806	31.7617
	SICTR SP1	HPRT1	UNKNOWN	VIC	NFQ-MGB	31.061	31.0746
	SICTR SP2	HPRT1	UNKNOWN	VIC	NFQ-MGB	30.872	30.9252
	SICTR SP3	HPRT1	UNKNOWN	VIC	NFQ-MGB	31.348	31.2919
	SIYT SP1	HPRT1	UNKNOWN	VIC	NFQ-MGB	31.951	31.9421
	SIYT SP2	HPRT1	UNKNOWN	VIC	NFQ-MGB	31.687	31.7868
	SIYT SP3	HPRT1	UNKNOWN	VIC	NFQ-MGB	31.718	31.7617
	SICTR SP1	HES1	UNKNOWN	FAM	NFQ-MGB	32.118	32.0025
	SICTR SP2	HES1	UNKNOWN	FAM	NFQ-MGB	32.09	32.1229
	SICTR SP3	HES1	UNKNOWN	FAM	NFQ-MGB	32.77	32.6871
	SIYT SP1	HES1	UNKNOWN	FAM	NFQ-MGB	34.313	34.5267
	SIYT SP2	HES1	UNKNOWN	FAM	NFQ-MGB	33.516	33.7038
	SIYT SP3	HES1	UNKNOWN	FAM	NFQ-MGB	34.422	34.0799
	SICTR SP1	HES1	UNKNOWN	FAM	NFQ-MGB	31.887	32.0025
	SICTR SP2	HES1	UNKNOWN	FAM	NFQ-MGB	32.156	32.1229
	SICTR SP3	HES1	UNKNOWN	FAM	NFQ-MGB	32.604	32.6871
	SIYT SP1	HES1	UNKNOWN	FAM	NFQ-MGB	34.741	34.5267
	SIYT SP2	HES1	UNKNOWN	FAM	NFQ-MGB	33.891	33.7038
	SIYT SP3	HES1	UNKNOWN	FAM	NFQ-MGB	33.738	34.0799
	Sample Name	Target Name	Task	Reporter	Quencher	CT	Ct Mean
	siC s1	GAPDH	UNKNOWN	VIC	NFQ-MGB	28.814	28.4467
	siC s2	GAPDH	UNKNOWN	VIC	NFQ-MGB	28.23	28.1881
	siC s3	GAPDH	UNKNOWN	VIC	NFQ-MGB	28.778	28.5914
	siYT s1	GAPDH	UNKNOWN	VIC	NFQ-MGB	29.59	29.4398
	siYT s2	GAPDH	UNKNOWN	VIC	NFQ-MGB	29.214	29.2483
	siYT s3	GAPDH	UNKNOWN	VIC	NFQ-MGB	28.413	28.2171
	siC s1	GAPDH	UNKNOWN	VIC	NFQ-MGB	28.08	28.4467
	siC s2	GAPDH	UNKNOWN	VIC	NFQ-MGB	28.146	28.1881
	siC s3	GAPDH	UNKNOWN	VIC	NFQ-MGB	28.404	28.5914
	siYT s1	GAPDH	UNKNOWN	VIC	NFQ-MGB	29.29	29.4398
	siYT s2	GAPDH	UNKNOWN	VIC	NFQ-MGB	29.283	29.2483
	siYT s3	GAPDH	UNKNOWN	VIC	NFQ-MGB	28.491	28.2171
	siC s1	bACTIN	UNKNOWN	VIC	NFQ-MGB	28.296	28.1409
	siC s2	bACTIN	UNKNOWN	VIC	NFQ-MGB	28.339	28.2327
	siC s3	bACTIN	UNKNOWN	VIC	NFQ-MGB	28.32	28.0496
	siYT s1	bACTIN	UNKNOWN	VIC	NFQ-MGB	29.275	29.2023
	siYT s2	bACTIN	UNKNOWN	VIC	NFQ-MGB	28.715	28.6384
	siYT s3	bACTIN	UNKNOWN	VIC	NFQ-MGB	28.484	28.2741
	siC s1	bACTIN	UNKNOWN	VIC	NFQ-MGB	27.985	28.1409
	siC s2	bACTIN	UNKNOWN	VIC	NFQ-MGB	28.126	28.2327
	siC s3	bACTIN	UNKNOWN	VIC	NFQ-MGB	27.779	28.0496
	siYT s1	bACTIN	UNKNOWN	VIC	NFQ-MGB	29.13	29.2023
	siYT s2	bACTIN	UNKNOWN	VIC	NFQ-MGB	28.562	28.6384
	siYT s3	bACTIN	UNKNOWN	VIC	NFQ-MGB	28.362	28.2741
	siC s1	ID1	UNKNOWN	FAM	NFQ-MGB	30.382	30.2438
	siC s2	ID1	UNKNOWN	FAM	NFQ-MGB	31.016	30.6893
	siC s3	ID1	UNKNOWN	FAM	NFQ-MGB	31.081	30.8198
	siYT s1	ID1	UNKNOWN	FAM	NFQ-MGB	31.862	31.6388
	siYT s2	ID1	UNKNOWN	FAM	NFQ-MGB	31.269	31.0882
	siYT s3	ID1	UNKNOWN	FAM	NFQ-MGB	31.183	30.8067
	siC s1	ID1	UNKNOWN	FAM	NFQ-MGB	30.105	30.2438
	siC s2	ID1	UNKNOWN	FAM	NFQ-MGB	30.362	30.6893
	siC s3	ID1	UNKNOWN	FAM	NFQ-MGB	30.559	30.8198
	siYT s1	ID1	UNKNOWN	FAM	NFQ-MGB	31.416	31.6388
	siYT s2	ID1	UNKNOWN	FAM	NFQ-MGB	30.908	31.0882
	siYT s3	ID1	UNKNOWN	FAM	NFQ-MGB	30.867	30.8067

## Sheet: Figure 7K
Figure 7K - Quantification of endothelial cells positive for pSMAD1/5/8 at the sprouting front of the P6 retina in YapTaz iEC-KO
	Type1	Total number of cells	Type2	Type3	Type 4	2 + 3 should be = 1	% of pSMAD + Endothelial cells	Average/animal	Genotype		% of pSMAD + Endothelial cells					% of pSMAD + Endothelial cells
	Endothelial nuclei		pSMAD negative	pSMAD positive	pSMAD not sure						WT	KO				WT	KO
B318 (231116)_SF_P2_1	37	123	15	22		37	59.4595	52	KO		5	52			Average	5	52
B318 (231116)_SF_P2_2	40		20	20		40	50				8	53			SD D	2.21897	0.544949
B318 (231116)_SF_P2_3	46		23	21	2	46	45.6522				3	52
B318 (231116)_SF_P3_1	36	139	35	0	1	36	0	5	WT
B318 (231116)_SF_P3_2	48		33	7	8	48	14.5833
B318 (231116)_SF_P3_3	55		44	0	11	55	0				Total number of cells					Total number of cells
B318 (231116)_SF_P4_1	43	124	33	4	6	43	9.30233	7	Yap KO, Taz Het		WT	KO				WT	KO
B318 (231116)_SF_P4_2	52		47	1	3	51	1.92308				139	123			Average	167	137
B318 (231116)_SF_P4_3	29		23	3	3	29	10.3448				158	169			SD D	33.4215	28.1129
B318 (231116)_SF_P5_1	37	114	34	0	3	37	0	15	Yap KO, Taz Het		204	118
B318 (231116)_SF_P5_2	37		23	9	4	36	24.3243
B318 (231116)_SF_P5_3	40		30	8	2	40	20
B312 (251116)_SF_P2_1	48	158	46	0	2	48	0	8	WT
B312 (251116)_SF_P2_2	63		60	1	2	63	1.5873
B312 (251116)_SF_P2_3	47		34	10	3	47	21.2766
B312 (251116)_SF_P3_1	54	169	20	31	3	54	57.4074	53	KO
B312 (251116)_SF_P3_2	60		17	42	0	59	70
B312 (251116)_SF_P3_3	55		35	17	3	55	30.9091
B312 (251116)_SF_P5_1	36	118	15	14	4	33	38.8889	52	KO
B312 (251116)_SF_P5_2	54		13	35	5	53	64.8148
B312 (251116)_SF_P5_3	28		8	15	4	27	53.5714
B312 (251116)_SF_P5_4 didn’t include	39		8	31	0	39	79.4872
B312 (251116)_SF_P6_1	70	204	67	0	3	70	0	3	WT
B312 (251116)_SF_P6_2	59		57	1	0	58	1.69492
B312 (251116)_SF_P6_3	75		66	6	1	73	8
