# Supplementary material for: YAP and TAZ regulate adherens junction dynamics and endothelial cell distribution during vascular development
Source: eLife. 2018 Feb 5;7:e31037. doi: 10.7554/eLife.31037 (PMC5814147; doi:10.7554/eLife.31037)
Supplement: Figure 8—source data 1. — Values for quantification of wound closure at 16 hr in YAP/TAZ knockdown HUVECs treated with Notch (Figure 8B) and BMP (Figure 8E) inhibitors. Values for quantification of permeability of YAP/TAZ knockdown HUVECs treated with 1 μM Ldn193189 (Figure 8F). Values for quantification of morphological analysis of VE-Cadherin in YAP/TAZ knockdown HUVECs treated with 1 μM Ldn193189 (Figure 8I). [file elife-31037-fig8-data1.xls]

## Sheet: Figure 8A, D
Figure 8 - A - Luciferase reporter assay for Notch activity in YAP/TAZ knockdown HUVECs and controls treated with 0.1uM DBZ or DMSO
	siCTR DMSO	siCTR DBZ 0.1uM	siYAP+siTAZ DMSO	siYAP+siTAZ DBZ 0.1uM			n= 3 -4 biological replicates per condition
	1.09655	0.0664904	4.09556	1.23626
	0.90345	0.0608349	2.48946	0.647705
	1	0.487306	6.1475	1.7627
				0.669398
Figure 8 - D - Luciferase reporter assay for BMP activity in YAP/TAZ knockdown HUVECs and controls treated with 25 ng/mL Alk1fc, 0.25ug/mL ENGecd, 0.1ug/mL Gremlin, 1uM K02288, 1uM Ldn193189 and DMSO.
	siCTR DMSO	siCTR ENGecd	siCTR Alk1fc	siCTR Ldn193189	siCTR K02288	siCTR Gremlin	siYAP+siTAZ DMSO	siYAP+siTAZ ENGecd	siYAP+siTAZ Alk1fc	siYAP+siTAZ Ldn193189	siYAP+siTAZ K02288	siYAP+siTAZ Gremlin		n= 3 - 6 biological replicates per condition
	1.01639	1.01824	0.679838	1.29698	0.986171	1.3224	14.7683	10.0036	22.6014	6.82757	16.5579	3.92728
	1.11475	2.13704	0.332014	0.89644	1.03151	1.51545	11.5333	9.84226	24.0052	8.83567	14.4563	19.9354
	0.868852	0.507537	0.276641	1.564	0.850148	1.47418	12.4241	8.49769	29.0589	6.30237	10.9537	8.65034
	1.14423	1.28919				1.26508	9.87732	1.37115	3.28416			16.1845
	0.855769	1.19319				1.17098	12.7063	28.7391
								29.1526

## Sheet: Figure 8B, E
Figure 8 B -Quantification of wound closure at 16h for HUVECs knocked down for YAP/TAZ and treated with 0.1uM DBZ or DMSO.
Scratch wound assay - 15/11/2017					Scratch wound assay -23/11/2017						siCTR DMSO	siYAPTAZ DMSO	siCTR DBZ	siYAPTAZ DBZ
16h					16h					2017-11-15	100	13.0261	100	33.8952
	Area of wound measured in ImageJ										100	25.3048	100	25.2034
	0h	16h	% of closure			Area of wound measured in ImageJ					100	40.5196	100	21.7772
siCTR_DMSO_1	didn’t measure	0	100			0h	16h	% of closure		2017-11-23	99.4639	42.9696	95.9525	28.3084
siCTR_DMSO_2	didn’t measure	0	100		siCTR_DMSO_1	42.4225	0.227431	99.4639			99.2727	29.0914	100	30.6715
siCTR_DMSO_3	didn’t measure	0	100		siCTR_DMSO_2	40.7946	0.296682	99.2727			99.7714	21.3116	100	46.1736
siYapTaz_DMSO_1	381.237	331.576	13.0261		siCTR_DMSO_3	44.1352	0.100887	99.7714
siYapTaz_DMSO_2	403.239	301.2	25.3048		siYapTaz_DMSO_1	53.7498	30.6537	42.9696
siYapTaz_DMSO_3	401.856	239.026	40.5196		siYapTaz_DMSO_2	52.9136	37.5203	29.0914
					siYapTaz_DMSO_3	49.0264	38.5781	21.3116
siCTR_DBZ_1	didn’t measure	0	100
siCTR_DBZ_2	didn’t measure	0	100		siCTR_DBZ_1	48.0357	1.94425	95.9525
siCTR_DBZ_3	didn’t measure	0	100		siCTR_DBZ_2	36.2305	0	100
siYapTaz_DBZ_1	400.976	265.064	33.8952		siCTR_DBZ_3	39.3447	0	100
siYapTaz_DBZ_2	433.359	324.138	25.2034		siYapTaz_DBZ_1	54.4707	39.0509	28.3084
siYapTaz_DBZ_3	452.182	353.709	21.7772		siYapTaz_DBZ_2	51.282	35.553	30.6715
					siYapTaz_DBZ_3	56.8214	30.5849	46.1736
Figure 8 E - Quantification of wound closure at 16h for HUVECs knocked down for YAP/TAZ and treated with 1uM Ldn193189 or DMSO
Scratch wound assay 30/11/2017					Scratch wound assay 06/12/2017						siCTR DMSO	siYAPTAZ DMSO	siCTR Ldn	siYAPTAZ Ldn
16h					16h					2017-12-06	97.9001	46.2602	100	68.1689
	Area of wound measured in ImageJ					Area of wound measured in ImageJ					100	33.9421	98.1285	75.0127
	0h	16h	% of closure	observation		0h	16h	% of closure			92.1116	36.7487	99.2893	60.4658
siCTR_DMSO_1	didn’t quantify	0	100		siCTR_DMSO_1	40.4369	0.849151	97.9001				37.6954		49.713
siCTR_DMSO_2	didn’t quantify	0	100		siCTR_DMSO_2	40.4869	0	100				30.4709		58.3718
siCTR_DMSO_3	didn’t quantify	0	100		siCTR_DMSO_3	43.5911	3.43866	92.1116		2017-11-30	100	6.70735	100	6.80868
siYapTaz_DMSO_1	44.7587	41.7566	6.70735	cells didn’t do monolayer - sparse - excluded	siYapTaz_DMSO_1	43.1962	23.2135	46.2602			100	25.6163	100	41.5347
siYapTaz_DMSO_2	54.9666	40.8862	25.6163		siYapTaz_DMSO_2	44.697	29.5258	33.9421			100	26.9186	100	39.1919
siYapTaz_DMSO_3	47.2103	34.5019	26.9186		siYapTaz_DMSO_3	47.0995	29.7911	36.7487					100	22.8934
					siYapTaz_DMSO_4	44.0278	27.4313	37.6954
siCTR_LDN_1	didn’t quantify	0	100		siYapTaz_DMSO_5	48.3119	33.5909	30.4709
siCTR_LDN_2	didn’t quantify	0	100
siCTR_LDN_3	didn’t quantify	0	100		siCTR_LDN_1	didn’t quantify	0	100
siCTR_LDN_4	didn’t quantify	0	100		siCTR_LDN_2	43.6607	0.81713	98.1285
siYapTaz_LDN_1	47.4045	44.1769	6.80868	cells didn’t do monolayer - sparse - excluded	siCTR_LDN_3	45.5426	0.323688	99.2893
siYapTaz_LDN_2	48.0322	28.0822	41.5347		siYapTaz_LDN_1	41.0176	13.0563	68.1689
siYapTaz_LDN_3	52.7245	32.0608	39.1919		siYapTaz_LDN_2	47.4655	11.8603	75.0127
siYapTaz_LDN_4	44.8856	34.6098	22.8934	cells didn’t do monolayer - sparse - excluded	siYapTaz_LDN_3	47.0179	18.5882	60.4658
					siYapTaz_LDN_4	49.2973	24.7901	49.713
					siYapTaz_LDN_5	46.0193	19.157	58.3718

## Sheet: Figure8F
Figure 8 F - Permeability of HUVECs knocked down for YAP/TAZ and treated with 1uM Ldn193189 or DMSO to 250kDa fluorescent dextran molecules
	siCTR DMSO	siYAPTAZ DMSO	siCTR Ldn	siYAPTAZ Ldn
2017-12-07	6433.76	17161.8	3890.69	6631.31
	6162.17	14137.5	3678.28	5866.62
	6193.37	16430.3	3738.9	7045.71
	6164.36	15218.8	3548.55	7218.9
	7027.23	13911.9	3536.34	6518.59
	5485.75	18936.9	4561.95	8082.02
Reading at 6h after adding FITC-Dextran;
NOTE: removed 100uL aliquot per well from bottom well; reading in white opaque plate without prior dilution

## Sheet: Figure8I
Figure 8 I - Morphological analysis of VE-Cadherin labelled cell junctions in HUVECs knocked down for YAP/TAZ and treated with 1uM Ldn193189 or DMSO control
Unordered patches classification
0	No junction - not sure - out of focus
1	Linear
2	Thicker
3	Pre-JAIL
4	JAIL
5	Fingers
Patches classification					Patches solutions				exp_type	exp_number	type	counter											Total number of counts per experiment	Total number of counts per condition				COUNTS	siYAPTAZ DMSO				PERCENTAGE	siYAPTAZ DMSO
EXP1 + EXP2 + EXP3									DMSO	1	JAIL	0				EXP	Type	Counts	Percentage		DMSO	Exp1	57	172				straight	30	36	23		straight	52.6316	51.4286	51.1111
Patch number	Morphology classification				Patch number	image_name	2018-01-17		DMSO	1	fingers	17			DMSO	1	straight	30	52.6316			Exp2	70					thick	9	15	5		thick	15.7895	21.4286	11.1111
0	0				0	VeCad488_siYAPTAZ_DMSO_cvs3_image1.tif	60		DMSO	1	straight	30			DMSO	2	straight	36	51.4286			Exp3	45					thick JAIL	1	6	2		thick JAIL	1.75439	8.57143	4.44444
1	1				1	VeCad488_siYAPTAZ_DMSO_cvs2_image2.tif	85		DMSO	1	thick	9			DMSO	3	straight	23	51.1111									JAIL	0	2	2		JAIL	0	2.85714	4.44444
2	2				2	VeCad488_siYAPTAZ_DMSO_cvs1_image1.tif	4		DMSO	1	thick JAIL	1			DMSO	1	thick	9	15.7895		LDN	Exp1	61	199				Fingers	17	11	13		Fingers	29.8246	15.7143	28.8889
3	0				3	VeCad488_siYAPTAZ_DMSO_cvs3_image3.tif	99		DMSO	2	JAIL	2			DMSO	2	thick	15	21.4286			Exp2	75
4	1				4	VeCad488_siYAPTAZ_DMSO_cvs3_image2.tif	38		DMSO	2	fingers	11			DMSO	3	thick	5	11.1111			Exp3	63
5	1				5	VeCad488_siYAPTAZ_DMSO_cvs1_image1.tif	7		DMSO	2	straight	36			DMSO	1	thick JAIL	1	1.75439									COUNTS	siYAPTAZ LDN				PERCENTAGE	siYAPTAZ LDN
6	1				6	VeCad488_siYAPTAZ_Ldn_cvs3_image2.tif	37		DMSO	2	thick	15			DMSO	2	thick JAIL	6	8.57143									straight	17	30	27		straight	27.8689	40	42.8571
7	1				7	VeCad488_siYAPTAZ_Ldn_cvs3_image2.tif	11		DMSO	2	thick JAIL	6			DMSO	3	thick JAIL	2	4.44444									thick	19	22	12		thick	31.1475	29.3333	19.0476
8	0				8	VeCad488_siYAPTAZ_DMSO_cvs1_image3.tif	85		DMSO	3	JAIL	2			DMSO	1	JAIL	0	0									thick JAIL	13	11	10		thick JAIL	21.3115	14.6667	15.873
9	5				9	VeCad488_siYAPTAZ_DMSO_cvs2_image1.tif	58		DMSO	3	fingers	13			DMSO	2	JAIL	2	2.85714									JAIL	5	4	6		JAIL	8.19672	5.33333	9.52381
10	1				10	VeCad488_siYAPTAZ_Ldn_cvs1_image2.tif	74		DMSO	3	straight	23			DMSO	3	JAIL	2	4.44444									Fingers	7	8	8		Fingers	11.4754	10.6667	12.6984
11					11	VeCad488_siYAPTAZ_DMSO_cvs2_image2.tif	80		DMSO	3	thick	5			DMSO	1	fingers	17	29.8246
12	1				12	VeCad488_siYAPTAZ_DMSO_cvs3_image2.tif	90		DMSO	3	thick JAIL	2			DMSO	2	fingers	11	15.7143
13	2				13	VeCad488_siYAPTAZ_Ldn_cvs1_image1.tif	30								DMSO	3	fingers	13	28.8889
14	1				14	VeCad488_siYAPTAZ_DMSO_cvs1_image2.tif	50		Ldn	1	JAIL	5
15	2				15	VeCad488_siYAPTAZ_Ldn_cvs2_image2.tif	3		Ldn	1	fingers	7
16	3				16	VeCad488_siYAPTAZ_Ldn_cvs2_image3.tif	5		Ldn	1	straight	17				EXP	Type	Counter	Percentage		confirm that precentages add up to 100 percent - correct
17	1				17	VeCad488_siYAPTAZ_DMSO_cvs1_image3.tif	46		Ldn	1	thick	19			Ldn	1	straight	17	27.8689		100	DMSO exp1
18	1				18	VeCad488_siYAPTAZ_DMSO_cvs2_image3.tif	98		Ldn	1	thick JAIL	13			Ldn	2	straight	30	40		100	DMSO exp2
19	3				19	VeCad488_siYAPTAZ_DMSO_cvs2_image3.tif	20		Ldn	2	JAIL	4			Ldn	3	straight	27	42.8571		100	DMSO exp3
20	0				20	VeCad488_siYAPTAZ_Ldn_cvs2_image3.tif	67		Ldn	2	fingers	8			Ldn	1	thick	19	31.1475		100	Ldn exp1
21	0				21	VeCad488_siYAPTAZ_Ldn_cvs3_image3.tif	68		Ldn	2	straight	30			Ldn	2	thick	22	29.3333		100	Ldn exp2
22	5				22	VeCad488_siYAPTAZ_DMSO_cvs1_image2.tif	43		Ldn	2	thick	22			Ldn	3	thick	12	19.0476		100	Ldn exp3
23	0				23	VeCad488_siYAPTAZ_DMSO_cvs1_image3.tif	44		Ldn	2	thick JAIL	11			Ldn	1	thick JAIL	13	21.3115
24	0				24	VeCad488_siYAPTAZ_Ldn_cvs1_image3.tif	25		Ldn	3	JAIL	6			Ldn	2	thick JAIL	11	14.6667
25	1				25	VeCad488_siYAPTAZ_DMSO_cvs2_image1.tif	68		Ldn	3	fingers	8			Ldn	3	thick JAIL	10	15.873
26	2				26	VeCad488_siYAPTAZ_DMSO_cvs3_image3.tif	65		Ldn	3	straight	27			Ldn	1	JAIL	5	8.19672
27	3				27	VeCad488_siYAPTAZ_Ldn_cvs2_image3.tif	60		Ldn	3	thick	12			Ldn	2	JAIL	4	5.33333
28	0				28	VeCad488_siYAPTAZ_DMSO_cvs1_image2.tif	76		Ldn	3	thick JAIL	10			Ldn	3	JAIL	6	9.52381
29	1				29	VeCad488_siYAPTAZ_DMSO_cvs1_image3.tif	15								Ldn	1	fingers	7	11.4754
30	3				30	VeCad488_siYAPTAZ_DMSO_cvs2_image3.tif	43								Ldn	2	fingers	8	10.6667
31	3				31	VeCad488_siYAPTAZ_Ldn_cvs1_image2.tif	85								Ldn	3	fingers	8	12.6984
32	1				32	VeCad488_siYAPTAZ_DMSO_cvs3_image3.tif	71
33	1				33	VeCad488_siYAPTAZ_DMSO_cvs2_image2.tif	31
34	2				34	VeCad488_siYAPTAZ_Ldn_cvs1_image2.tif	30
35	3				35	VeCad488_siYAPTAZ_DMSO_cvs3_image2.tif	78
36	0				36	VeCad488_siYAPTAZ_DMSO_cvs1_image1.tif	22
37	0				37	VeCad488_siYAPTAZ_DMSO_cvs2_image3.tif	18
38	0				38	VeCad488_siYAPTAZ_DMSO_cvs2_image3.tif	65		COUNTS	siYAPTAZ DMSO				PERCENTAGE	siYAPTAZ DMSO
39	2				39	VeCad488_siYAPTAZ_Ldn_cvs2_image3.tif	56		straight	30	36	23		straight	52.6316	51.4286	51.1111
40	1				40	VeCad488_siYAPTAZ_DMSO_cvs2_image3.tif	55		thick	9	15	5		thick	15.7895	21.4286	11.1111
41	0				41	VeCad488_siYAPTAZ_DMSO_cvs2_image1.tif	24		thick JAIL	1	6	2		thick JAIL	1.75439	8.57143	4.44444
42	1				42	VeCad488_siYAPTAZ_Ldn_cvs2_image3.tif	47		JAIL	0	2	2		JAIL	0	2.85714	4.44444
43	3				43	VeCad488_siYAPTAZ_DMSO_cvs2_image2.tif	84		Fingers	17	11	13		Fingers	29.8246	15.7143	28.8889
44	1				44	VeCad488_siYAPTAZ_Ldn_cvs1_image3.tif	6
45	0				45	VeCad488_siYAPTAZ_Ldn_cvs1_image2.tif	51
46	5				46	VeCad488_siYAPTAZ_DMSO_cvs1_image3.tif	93		COUNTS	siYAPTAZ LDN				PERCENTAGE	siYAPTAZ LDN
47	5				47	VeCad488_siYAPTAZ_DMSO_cvs1_image3.tif	56		straight	17	30	27		straight	27.8689	40	42.8571
48	0				48	VeCad488_siYAPTAZ_DMSO_cvs2_image1.tif	66		thick	19	22	12		thick	31.1475	29.3333	19.0476
49	0				49	VeCad488_siYAPTAZ_Ldn_cvs1_image2.tif	76		thick JAIL	13	11	10		thick JAIL	21.3115	14.6667	15.873
50	1				50	VeCad488_siYAPTAZ_DMSO_cvs1_image2.tif	4		JAIL	5	4	6		JAIL	8.19672	5.33333	9.52381
51	2				51	VeCad488_siYAPTAZ_Ldn_cvs3_image2.tif	23		Fingers	7	8	8		Fingers	11.4754	10.6667	12.6984
52	2				52	VeCad488_siYAPTAZ_Ldn_cvs1_image2.tif	56
53	3				53	VeCad488_siYAPTAZ_DMSO_cvs2_image1.tif	79
54	3				54	VeCad488_siYAPTAZ_DMSO_cvs2_image2.tif	32
55	1				55	VeCad488_siYAPTAZ_DMSO_cvs3_image3.tif	36
56	1				56	VeCad488_siYAPTAZ_DMSO_cvs2_image2.tif	29
57	5				57	VeCad488_siYAPTAZ_DMSO_cvs1_image2.tif	81
58	0				58	VeCad488_siYAPTAZ_DMSO_cvs1_image3.tif	91
59	1				59	VeCad488_siYAPTAZ_Ldn_cvs1_image2.tif	66
60	5				60	VeCad488_siYAPTAZ_DMSO_cvs1_image2.tif	52
61	1				61	VeCad488_siYAPTAZ_Ldn_cvs3_image1.tif	30
62	0				62	VeCad488_siYAPTAZ_DMSO_cvs1_image3.tif	76
63	1				63	VeCad488_siYAPTAZ_DMSO_cvs3_image3.tif	73
64	0				64	VeCad488_siYAPTAZ_Ldn_cvs2_image1.tif	95
65	0				65	VeCad488_siYAPTAZ_Ldn_cvs1_image1.tif	48
66	2				66	VeCad488_siYAPTAZ_Ldn_cvs1_image2.tif	24
67	3				67	VeCad488_siYAPTAZ_DMSO_cvs2_image3.tif	9
68	0				68	VeCad488_siYAPTAZ_DMSO_cvs3_image3.tif	40
69	2				69	VeCad488_siYAPTAZ_Ldn_cvs3_image2.tif	55
70	1				70	VeCad488_siYAPTAZ_Ldn_cvs2_image2.tif	34
71	4				71	VeCad488_siYAPTAZ_Ldn_cvs2_image3.tif	46
72	4				72	VeCad488_siYAPTAZ_Ldn_cvs2_image3.tif	95
73	1				73	VeCad488_siYAPTAZ_DMSO_cvs1_image1.tif	29
74	1				74	VeCad488_siYAPTAZ_Ldn_cvs2_image2.tif	20
75	3				75	VeCad488_siYAPTAZ_Ldn_cvs2_image3.tif	39
76	0				76	VeCad488_siYAPTAZ_Ldn_cvs3_image3.tif	66
77	0				77	VeCad488_siYAPTAZ_Ldn_cvs2_image3.tif	34
78	2				78	VeCad488_siYAPTAZ_DMSO_cvs3_image3.tif	14
79	1				79	VeCad488_siYAPTAZ_DMSO_cvs3_image2.tif	62
80	2				80	VeCad488_siYAPTAZ_Ldn_cvs2_image2.tif	29
81	0				81	VeCad488_siYAPTAZ_DMSO_cvs3_image2.tif	23
82	0				82	VeCad488_siYAPTAZ_DMSO_cvs2_image2.tif	23
83	3				83	VeCad488_siYAPTAZ_Ldn_cvs3_image2.tif	83
84	1				84	VeCad488_siYAPTAZ_DMSO_cvs1_image2.tif	49
85	2				85	VeCad488_siYAPTAZ_Ldn_cvs2_image2.tif	52
86	0				86	VeCad488_siYAPTAZ_Ldn_cvs3_image1.tif	88
87	5				87	VeCad488_siYAPTAZ_DMSO_cvs1_image1.tif	21
88	2				88	VeCad488_siYAPTAZ_DMSO_cvs2_image2.tif	17
89	4				89	VeCad488_siYAPTAZ_Ldn_cvs3_image3.tif	86
90	2				90	VeCad488_siYAPTAZ_Ldn_cvs3_image3.tif	19
91	1				91	VeCad488_siYAPTAZ_DMSO_cvs2_image2.tif	30
92	0				92	VeCad488_siYAPTAZ_DMSO_cvs3_image2.tif	61
93	0				93	VeCad488_siYAPTAZ_DMSO_cvs1_image1.tif	42
94	2				94	VeCad488_siYAPTAZ_DMSO_cvs2_image3.tif	10
95	1				95	VeCad488_siYAPTAZ_Ldn_cvs1_image1.tif	0
96	1				96	VeCad488_siYAPTAZ_DMSO_cvs3_image2.tif	30
97	0				97	VeCad488_siYAPTAZ_DMSO_cvs3_image3.tif	89
98	1				98	VeCad488_siYAPTAZ_Ldn_cvs2_image3.tif	27
99	2				99	VeCad488_siYAPTAZ_Ldn_cvs2_image2.tif	74
100	1				100	VeCad488_siYAPTAZ_DMSO_cvs3_image3.tif	74
101	0				101	VeCad488_siYAPTAZ_DMSO_cvs1_image2.tif	98
102	3				102	VeCad488_siYAPTAZ_Ldn_cvs1_image3.tif	33
103	1				103	VeCad488_siYAPTAZ_DMSO_cvs1_image2.tif	97
104	2				104	VeCad488_siYAPTAZ_DMSO_cvs2_image2.tif	93
105	0				105	VeCad488_siYAPTAZ_Ldn_cvs1_image1.tif	14
106	1				106	VeCad488_siYAPTAZ_Ldn_cvs3_image2.tif	88
107	2				107	VeCad488_siYAPTAZ_Ldn_cvs2_image3.tif	40
108	0				108	VeCad488_siYAPTAZ_Ldn_cvs1_image2.tif	18
109	1				109	VeCad488_siYAPTAZ_DMSO_cvs1_image3.tif	6
110	0				110	VeCad488_siYAPTAZ_DMSO_cvs3_image1.tif	75
111	4				111	VeCad488_siYAPTAZ_Ldn_cvs1_image1.tif	69
112	4				112	VeCad488_siYAPTAZ_Ldn_cvs3_image1.tif	12
113	2				113	VeCad488_siYAPTAZ_DMSO_cvs2_image3.tif	94
114	0				114	VeCad488_siYAPTAZ_Ldn_cvs2_image3.tif	90
115	1				115	VeCad488_siYAPTAZ_Ldn_cvs2_image1.tif	66
116	4				116	VeCad488_siYAPTAZ_DMSO_cvs2_image1.tif	95
117	0				117	VeCad488_siYAPTAZ_Ldn_cvs2_image1.tif	88
118	1				118	VeCad488_siYAPTAZ_DMSO_cvs1_image2.tif	1
119	2				119	VeCad488_siYAPTAZ_Ldn_cvs2_image2.tif	61
120	0				120	VeCad488_siYAPTAZ_DMSO_cvs3_image3.tif	45
121	4				121	VeCad488_siYAPTAZ_Ldn_cvs3_image3.tif	3
122	0				122	VeCad488_siYAPTAZ_DMSO_cvs3_image1.tif	42
123	0				123	VeCad488_siYAPTAZ_Ldn_cvs3_image1.tif	63
124	1				124	VeCad488_siYAPTAZ_DMSO_cvs2_image2.tif	81
125	0				125	VeCad488_siYAPTAZ_DMSO_cvs1_image2.tif	53
126	0				126	VeCad488_siYAPTAZ_DMSO_cvs1_image2.tif	66
127	2				127	VeCad488_siYAPTAZ_Ldn_cvs1_image2.tif	87
128	1				128	VeCad488_siYAPTAZ_DMSO_cvs1_image2.tif	87
129	5				129	VeCad488_siYAPTAZ_Ldn_cvs3_image3.tif	85
130	0				130	VeCad488_siYAPTAZ_DMSO_cvs1_image2.tif	5
131	2				131	VeCad488_siYAPTAZ_DMSO_cvs1_image2.tif	34
132	0				132	VeCad488_siYAPTAZ_DMSO_cvs3_image1.tif	21
133	0				133	VeCad488_siYAPTAZ_Ldn_cvs3_image3.tif	4
134	0				134	VeCad488_siYAPTAZ_Ldn_cvs2_image2.tif	56
135	0				135	VeCad488_siYAPTAZ_DMSO_cvs2_image1.tif	63
136	5				136	VeCad488_siYAPTAZ_DMSO_cvs1_image3.tif	53
137	2				137	VeCad488_siYAPTAZ_Ldn_cvs1_image1.tif	16
138	5				138	VeCad488_siYAPTAZ_DMSO_cvs2_image3.tif	90
139	2				139	VeCad488_siYAPTAZ_Ldn_cvs1_image1.tif	13
140	1				140	VeCad488_siYAPTAZ_DMSO_cvs2_image3.tif	73
141	4				141	VeCad488_siYAPTAZ_Ldn_cvs2_image3.tif	81
142	4				142	VeCad488_siYAPTAZ_Ldn_cvs2_image1.tif	79
143	0				143	VeCad488_siYAPTAZ_DMSO_cvs2_image3.tif	42
144	3				144	VeCad488_siYAPTAZ_Ldn_cvs3_image2.tif	30
145	1				145	VeCad488_siYAPTAZ_Ldn_cvs1_image1.tif	94
146	0				146	VeCad488_siYAPTAZ_DMSO_cvs3_image3.tif	34
147	0				147	VeCad488_siYAPTAZ_DMSO_cvs2_image3.tif	29
148	0				148	VeCad488_siYAPTAZ_Ldn_cvs2_image2.tif	71
149	2				149	VeCad488_siYAPTAZ_DMSO_cvs1_image3.tif	55
150	1				150	VeCad488_siYAPTAZ_DMSO_cvs2_image3.tif	6
151	0				151	VeCad488_siYAPTAZ_DMSO_cvs2_image3.tif	63
152	0				152	VeCad488_siYAPTAZ_Ldn_cvs2_image1.tif	69
153	0				153	VeCad488_siYAPTAZ_Ldn_cvs2_image1.tif	8
154	0				154	VeCad488_siYAPTAZ_DMSO_cvs2_image3.tif	67
155	1				155	VeCad488_siYAPTAZ_DMSO_cvs1_image2.tif	37
156	1				156	VeCad488_siYAPTAZ_Ldn_cvs3_image3.tif	67
157	1				157	VeCad488_siYAPTAZ_Ldn_cvs2_image2.tif	98
158	0				158	VeCad488_siYAPTAZ_DMSO_cvs1_image3.tif	37
159	1				159	VeCad488_siYAPTAZ_Ldn_cvs1_image3.tif	7
160	3				160	VeCad488_siYAPTAZ_DMSO_cvs3_image3.tif	93
161	0				161	VeCad488_siYAPTAZ_Ldn_cvs3_image3.tif	57
162	2				162	VeCad488_siYAPTAZ_Ldn_cvs3_image1.tif	60
163	0				163	VeCad488_siYAPTAZ_Ldn_cvs3_image2.tif	27
164	3				164	VeCad488_siYAPTAZ_Ldn_cvs3_image3.tif	13
165	1				165	VeCad488_siYAPTAZ_Ldn_cvs2_image3.tif	7
166	5				166	VeCad488_siYAPTAZ_DMSO_cvs2_image2.tif	24
167	3				167	VeCad488_siYAPTAZ_Ldn_cvs2_image3.tif	88
168	0				168	VeCad488_siYAPTAZ_DMSO_cvs3_image2.tif	3
169	2				169	VeCad488_siYAPTAZ_Ldn_cvs1_image3.tif	34
170	3	1			170	VeCad488_siYAPTAZ_Ldn_cvs1_image1.tif	95
171	2				171	VeCad488_siYAPTAZ_Ldn_cvs3_image3.tif	33
172	1				172	VeCad488_siYAPTAZ_Ldn_cvs1_image2.tif	68
173	1				173	VeCad488_siYAPTAZ_DMSO_cvs2_image2.tif	66
174	5				174	VeCad488_siYAPTAZ_Ldn_cvs3_image1.tif	45
175	5				175	VeCad488_siYAPTAZ_DMSO_cvs1_image2.tif	73
176	1				176	VeCad488_siYAPTAZ_Ldn_cvs1_image1.tif	68
177	3				177	VeCad488_siYAPTAZ_Ldn_cvs1_image3.tif	49
178	2				178	VeCad488_siYAPTAZ_Ldn_cvs1_image1.tif	55
179	2				179	VeCad488_siYAPTAZ_Ldn_cvs1_image3.tif	83
180	0				180	VeCad488_siYAPTAZ_DMSO_cvs1_image1.tif	51
181	0				181	VeCad488_siYAPTAZ_DMSO_cvs1_image3.tif	20
182	0				182	VeCad488_siYAPTAZ_DMSO_cvs3_image1.tif	41
183	1				183	VeCad488_siYAPTAZ_Ldn_cvs3_image2.tif	99
184	0				184	VeCad488_siYAPTAZ_DMSO_cvs2_image3.tif	4
185	0				185	VeCad488_siYAPTAZ_DMSO_cvs1_image1.tif	25
186	0				186	VeCad488_siYAPTAZ_DMSO_cvs1_image3.tif	43
187	1				187	VeCad488_siYAPTAZ_DMSO_cvs3_image3.tif	91
188	1				188	VeCad488_siYAPTAZ_DMSO_cvs3_image1.tif	45
189	5				189	VeCad488_siYAPTAZ_DMSO_cvs2_image1.tif	26
190	3				190	VeCad488_siYAPTAZ_Ldn_cvs1_image3.tif	57
191	0				191	VeCad488_siYAPTAZ_Ldn_cvs2_image1.tif	24
192	1				192	VeCad488_siYAPTAZ_Ldn_cvs2_image2.tif	1
193	1				193	VeCad488_siYAPTAZ_DMSO_cvs2_image2.tif	9
194	1				194	VeCad488_siYAPTAZ_Ldn_cvs3_image3.tif	84
195	5				195	VeCad488_siYAPTAZ_Ldn_cvs3_image1.tif	84
196	3				196	VeCad488_siYAPTAZ_Ldn_cvs1_image1.tif	10
197	5				197	VeCad488_siYAPTAZ_DMSO_cvs2_image2.tif	39
198	5				198	VeCad488_siYAPTAZ_Ldn_cvs2_image3.tif	55
199	1				199	VeCad488_siYAPTAZ_Ldn_cvs2_image2.tif	32
200	3				200	VeCad488_siYAPTAZ_Ldn_cvs1_image3.tif	27
201	0				201	VeCad488_siYAPTAZ_Ldn_cvs1_image3.tif	35
202	3				202	VeCad488_siYAPTAZ_Ldn_cvs1_image2.tif	98
203	1				203	VeCad488_siYAPTAZ_Ldn_cvs2_image1.tif	50
204	2				204	VeCad488_siYAPTAZ_Ldn_cvs1_image1.tif	11
205	5				205	VeCad488_siYAPTAZ_DMSO_cvs3_image1.tif	62
206	1				206	VeCad488_siYAPTAZ_Ldn_cvs3_image2.tif	34
207	0				207	VeCad488_siYAPTAZ_DMSO_cvs1_image1.tif	79
208	1				208	VeCad488_siYAPTAZ_DMSO_cvs2_image2.tif	83
209	1				209	VeCad488_siYAPTAZ_DMSO_cvs2_image3.tif	38
210	1				210	VeCad488_siYAPTAZ_DMSO_cvs2_image3.tif	22
211	5				211	VeCad488_siYAPTAZ_DMSO_cvs1_image3.tif	98
212	1				212	VeCad488_siYAPTAZ_Ldn_cvs2_image2.tif	88
213	1				213	VeCad488_siYAPTAZ_Ldn_cvs1_image1.tif	4
214	0				214	VeCad488_siYAPTAZ_Ldn_cvs1_image2.tif	41
215	1				450	VeCad488_siYAPTAZ_DMSO_cvs2_image1.tif	14
216	0				461	VeCad488_siYAPTAZ_DMSO_cvs3_image2.tif	6
217	5				468	VeCad488_siYAPTAZ_DMSO_cvs2_image2.tif	74
218	1				472	VeCad488_siYAPTAZ_Ldn_cvs1_image1.tif	99
219	1				476	VeCad488_siYAPTAZ_Ldn_cvs3_image3.tif	0
220	3				479	VeCad488_siYAPTAZ_DMSO_cvs2_image1.tif	77
221	1				481	VeCad488_siYAPTAZ_DMSO_cvs2_image3.tif	58
222	0				483	VeCad488_siYAPTAZ_Ldn_cvs2_image2.tif	70
223	0				485	VeCad488_siYAPTAZ_Ldn_cvs1_image1.tif	15
224	0				487	VeCad488_siYAPTAZ_Ldn_cvs3_image1.tif	83
225	1				489	VeCad488_siYAPTAZ_DMSO_cvs2_image3.tif	53
226	5				490	VeCad488_siYAPTAZ_DMSO_cvs2_image1.tif	67
227	0				491	VeCad488_siYAPTAZ_DMSO_cvs1_image3.tif	64
228	5				492	VeCad488_siYAPTAZ_DMSO_cvs2_image2.tif	10
229	0				493	VeCad488_siYAPTAZ_DMSO_cvs3_image3.tif	49
230	2				494	VeCad488_siYAPTAZ_DMSO_cvs1_image2.tif	27
231	1				495	VeCad488_siYAPTAZ_Ldn_cvs3_image2.tif	79
232	4				496	VeCad488_siYAPTAZ_Ldn_cvs1_image3.tif	84
233	3				497	VeCad488_siYAPTAZ_Ldn_cvs1_image3.tif	48
234	0				498	VeCad488_siYAPTAZ_Ldn_cvs2_image2.tif	19
235	0				499	VeCad488_siYAPTAZ_Ldn_cvs1_image3.tif	10
236	2				500	VeCad488_siYAPTAZ_DMSO_cvs3_image3.tif	66
237	0
238	1
239	2
240	2
241	1
242	0
243	0
244	1	5
245	0
246	2
247	5
248	0
249	1
250	1
251	5
252	1
253	1
254	5
255	0
256	1
257	4
258	1
259	0
260	2
261	1
262	2
263	0
264	0
265	0
266	5
267	1
268	1
269	0
270	3
271	1
272	3
273	2
274	2
275	5
276	0
277	5
278	0
279	3	5
280	1
281	4
282	0
283	0
284	1
285	1	3
286	1
287	0
288	0
289	1
290	2
291	5	1
292	1
293	0
294	0
295	2
296	1
297	1
298	5
299	0
300	3
301	1	2
302	1
303	2	5
304	3
305	0
306	1
307	0
308	0
309	1
310	1
311	0
312	0
313	0
314	0
315	1
316	2
317	1	2
318	0
319	0
320	1
321	2
322	5
323	2
324	3
325	0
326	1
327	1
328	1
329	5
330	0
331	1
332	1
333	1
334	5
335	1
336	4
337	2
338	2
339	3
340	2
341	1
342	0
343	0
344	3
345	2
346	0
347	1
348	1
349	1
350	0
351	0
352	1
353	2	5
354	1
355	1
356	0
357	1
358	1
359	0
360	5
361	5
362	2
363	4
364	3
365	4
366	5
367	3
368	2
369	5
370	5
371	2
372	1
373	2
374	1
375	2
376	2
377	0
378	2
379	1
380	2
381	4
382	5
383	0
384	5
385	2
386	2
387	1
388	1
389	0
390	1
391	1
392	1
393	2
394	2
395	5
396	1
397	1
398	2
399	1
400	0
401	1
402	0
403	0
404	0
405	5
406	0
407	1
408	5
409	1
410	5
411	1
412	1
413	2
414	5
415	0
416	1
417	3
418	2
419	1
420	1
421	2
422	3
423	0
424	2
425	1
426	1
427	1
428	2
429	1
430	1
431	2
432	0
433	1
434	1
435	5
436	5
437	5
438	5
439	3
440	1
441	1
442	1
443	5	3
444	1
445	3
446	2
447	0
448	0
449	0
450	0
451	1
452	1
453	1
454	0
455	2
456	3
457	5
458	1
459	1
460	5
461	0
462	0
463	5
464	5
465	1
466	1
467	4
468	1
469	5
470	0
471	5
472	0
473	1
474	2
475	0
476	5
477	0
478	2
479	0
480	0
481	5
482	4
483	2
484	5
485	4
486	1
487	2
488	1
489	2
490	1
491	0
492	5
493	5
494	1
495	0
496	3
497	5
498	2
499	2
500	0
