# Supplementary material for: YAP and TAZ regulate adherens junction dynamics and endothelial cell distribution during vascular development
Source: eLife journal article supplement (doi:10.7554/elife.31037), 2018-02-05
Supplement: supp [file elife_poa_e31037_Figure_1_figure_supplement_1.pdf › elife_poa_e31037_Figure_1_figure_supplement_1.pdf]

Figure 1 - Figure Supplement 1

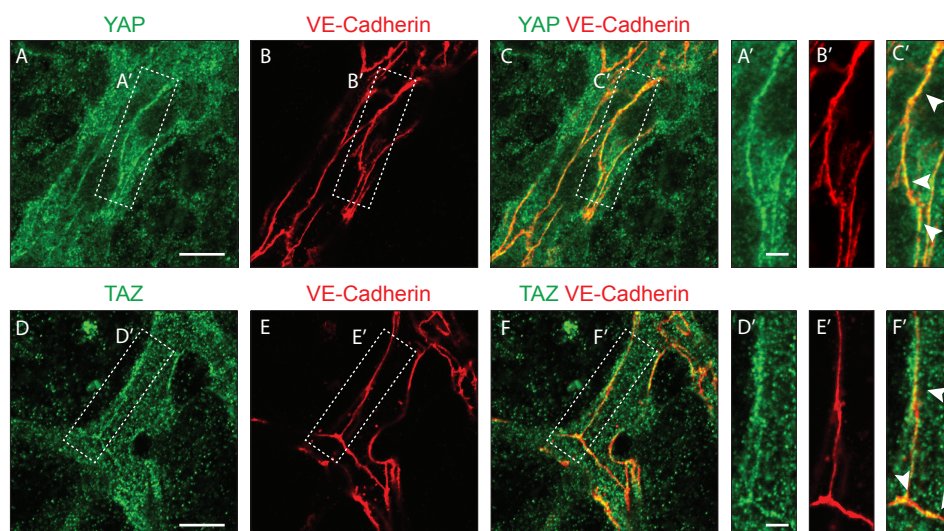

**Figure 1 - Figure supplement 1. YAP and TAZ localise at endothelial adherens junctions in the mouse retina.**

Immunofluorescence stainings of YAP (green, A-C, A'-C'), TAZ (green, D-F, D'-F') and VE-Cadherin (red, B, E, B', E') were performed in wild-type mouse retinas at P6. Arrows, co-localisation of YAP or TAZ with VE-Cadherin. Images correspond to single confocal planes.  $n > 3$  pups per staining. Scale bar A-C and D-F 10  $\mu\text{m}$ , A'-C' and D'-F' 3  $\mu\text{m}$ .
