# Supplementary material for: YAP and TAZ regulate adherens junction dynamics and endothelial cell distribution during vascular development
Source: eLife journal article supplement (doi:10.7554/elife.31037), 2018-02-05
Supplement: supp [file elife_poa_e31037_Figure_2_figure_supplement_1.pdf › elife_poa_e31037_Figure_2_figure_supplement_1.pdf]

Figure 2 - Figure supplement 1

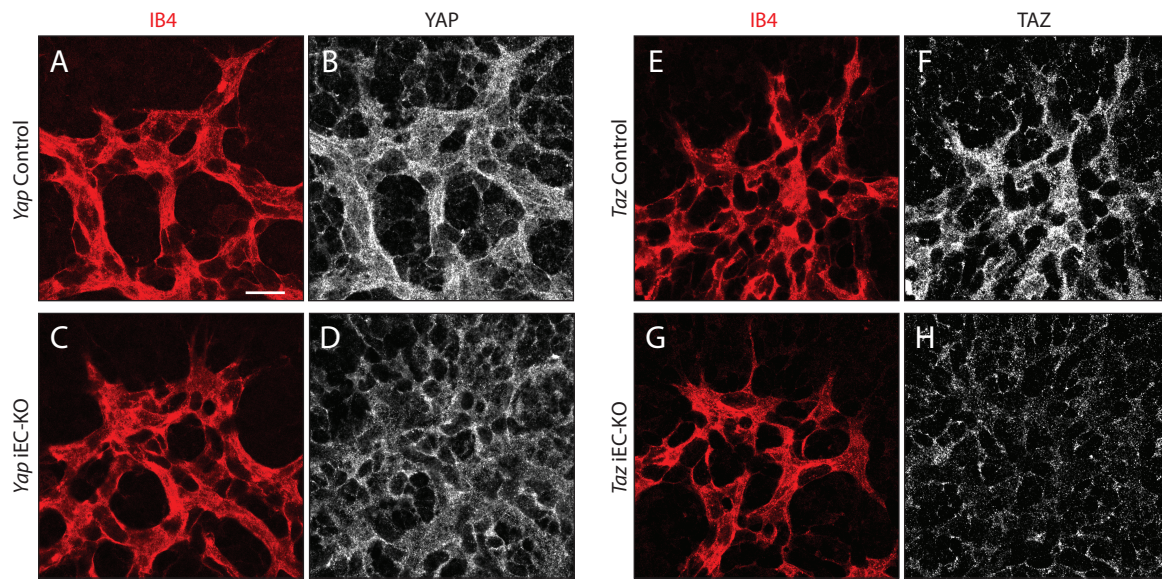

**Figure 2 – Figure supplement 1. YAP and TAZ proteins are lost upon Cre-mediated genetic deletion in P6 mouse retinas.**

*Yap* iEC-KO (*Yap*<sup>fl/fl</sup> *Pdgfb-iCreERT2*+/*wt*), *Taz* iEC-KO (*Taz*<sup>fl/fl</sup> *Pdgfb-iCreERT2*+/*wt*) and respective littermate control mice (*Yap*Control, *Yap*<sup>fl/fl</sup> and *Taz*Control, *Taz*<sup>fl/fl</sup>) were injected with tamoxifen at P1 and P3. At P6, mouse retinas were stained for YAP (grey, B,D), TAZ (grey, F,H), and with Isolectin B4 (IB4; red, A,C,E,G). *n* > 3 pups. Scale bar: 20μm.
