# Supplementary material for: YAP and TAZ regulate adherens junction dynamics and endothelial cell distribution during vascular development
Source: eLife journal article supplement (doi:10.7554/elife.31037), 2018-02-05
Supplement: supp [file elife_poa_e31037_Figure_3_figure_supplement_1.pdf › elife_poa_e31037_Figure_3_figure_supplement_1.pdf]

Figure 3 - Figure supplement 1

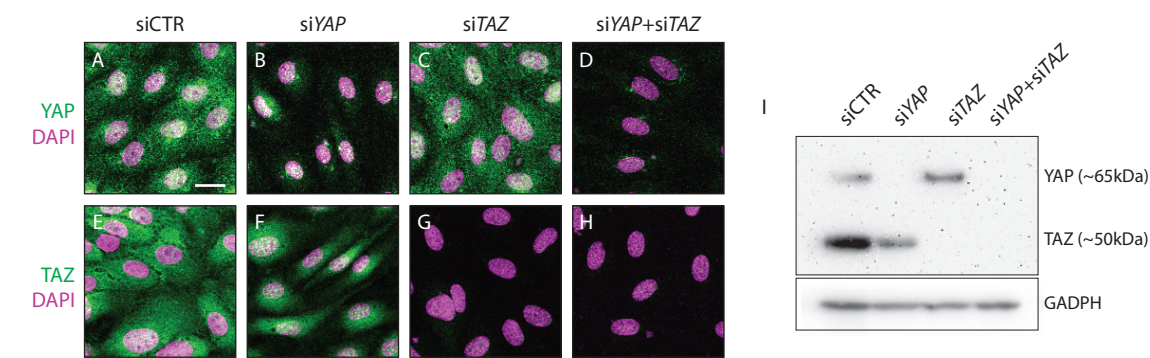

**Figure 3 – Figure supplement 1. YAP and TAZ proteins are lost after gene knockdown by siRNA in HUVECs.** HUVECs were treated with non targeting siRNA (siCTR) or siRNA targeting *YAP*, *TAZ* and *YAP + TAZ* for 24h. **A-H**, Immunofluorescence staining for YAP (green, **A-D**) or TAZ (green, **E-H**) and labelling of nuclei with DAPI (magenta) 72h after siRNA transfection. Scale bar: 10µm. **I**, Western blot for YAP/TAZ and GAPDH 72h after siRNA transfection.
