# Supplementary material for: YAP and TAZ regulate adherens junction dynamics and endothelial cell distribution during vascular development
Source: eLife journal article supplement (doi:10.7554/elife.31037), 2018-02-05
Supplement: supp [file elife_poa_e31037_Figure_3_figure_supplement_2.pdf › elife_poa_e31037_Figure_3_figure_supplement_2.pdf]

Figure 3 - Figure supplement 2

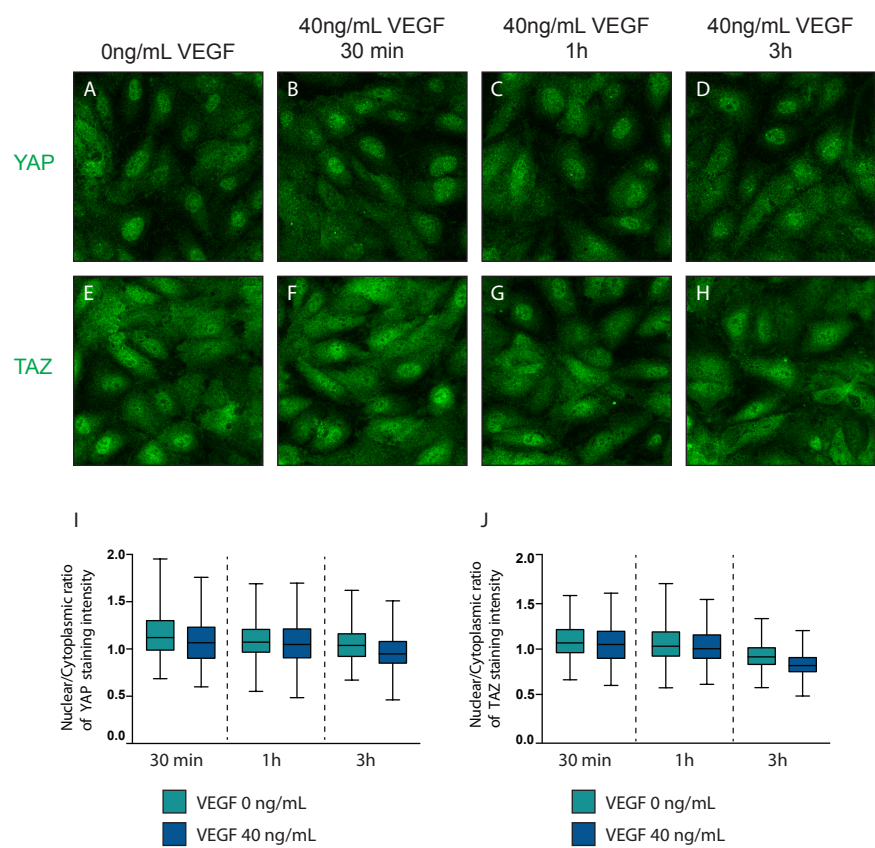

**Figure 3 – Figure supplement 2. VEGF treatment does not affect YAP and TAZ subcellular localisation.**

Confluent HUVECs were treated with 40ng/mL of VEGF for 30 min (B, F), 1h (C,G) and 3h (D,H) or control (A,E) and stained for YAP (A-D) or TAZ (E-H) and DAPI (not shown). I,J, Quantification of nuclear to cytoplasmic ratio of YAP (I) or TAZ (J) with VEGF treatment of one representative experiment. Nuclear/cytoplasmic ratio > 1, YAP/TAZ nuclear; nuclear/cytoplasmic ratio < 1, YAP/TAZ cytoplasmic. At least 200 cells quantified per condition per experiment. n= 2 independent experiments.
