# Supplementary material for: YAP and TAZ regulate adherens junction dynamics and endothelial cell distribution during vascular development
Source: eLife journal article supplement (doi:10.7554/elife.31037), 2018-02-05
Supplement: supp [file elife_poa_e31037_Figure_4_figure_supplement_1.pdf › elife_poa_e31037_Figure_4_figure_supplement_1.pdf]

Figure 4 - Figure supplement 1

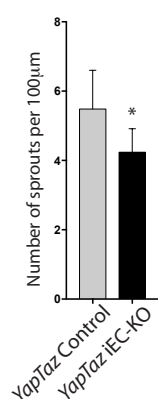

**Figure 4 - Figure supplement 1. Combined loss of YAP and TAZ leads to decreased number of sprouts in the developing mouse retina.**

Quantification of number of sprouts per 100 μm of sprouting front extension at P6 in *YapTaz* iEC-KO (n= 9 pups) and littermate control mice (n=9 pups). Data are mean  $\pm$  SD. p values were calculated using unpaired t-test. \*,  $p < 0.05$ .
