# Supplementary material for: YAP and TAZ regulate adherens junction dynamics and endothelial cell distribution during vascular development
Source: eLife journal article supplement (doi:10.7554/elife.31037), 2018-02-05
Supplement: supp [file elife_poa_e31037_Figure_7_figure_supplement_1.pdf › elife_poa_e31037_Figure_7_figure_supplement_1.pdf]

Figure 7 - Figure Supplement 1

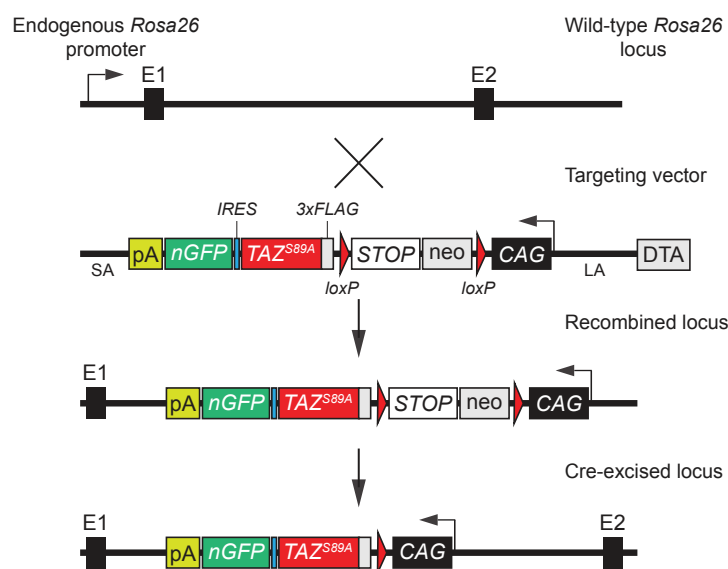

**Figure 7 - Figure supplement 1. Targeting strategy used for the generation of the conditional TAZ gain-of-function mouse model.**

cDNA coding for a 3xFLAG-tagged human TAZ S89A was inserted into a *Rosa26* targeting vector downstream of the ubiquitous CAG promoter. The cDNA also included an internal ribosome entry sequence (IRES) and a nuclear-localized enhanced green fluorescence protein (nEGFP) for monitoring transgene expression. To allow Cre-dependent expression of 3xFLAG-TAZS89A and of the EGFP reporter, a floxed transcriptional STOP cassette was incorporated between the 3xFLAG-TAZS89A-IRES-nEGFP sequence and the CAG promoter.
