# Supplementary material for: YAP and TAZ regulate adherens junction dynamics and endothelial cell distribution during vascular development
Source: eLife journal article supplement (doi:10.7554/elife.31037), 2018-02-05
Supplement: supp [file elife_poa_e31037_Figure_7_figure_supplement_2.pdf › elife_poa_e31037_Figure_7_figure_supplement_2.pdf]

Figure 7 - Figure Supplement 2

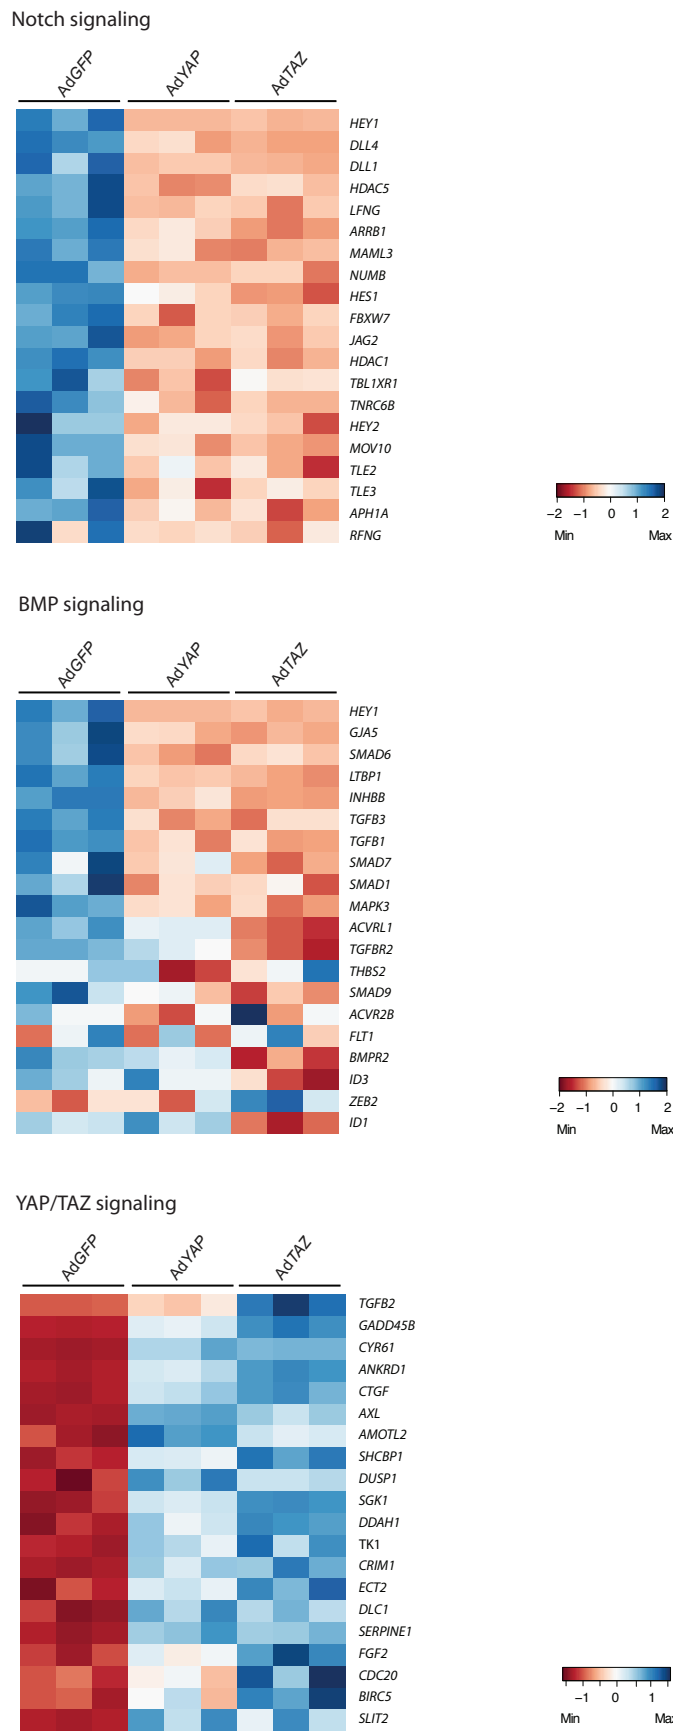

**Figure 7 - Figure supplement 2. Microarray of YAP and TAZ gain of function mutant cells.**  
Heatmaps of Notch, BMP and Hippo pathway genes in control (AdGFP), AdYAP and AdTAZ HUVECs.
