# Supplementary material for: YAP and TAZ regulate adherens junction dynamics and endothelial cell distribution during vascular development
Source: eLife journal article supplement (doi:10.7554/elife.31037), 2018-02-05
Supplement: supp [file elife_poa_e31037_Figure_7_figure_supplement_3.pdf › elife_poa_e31037_Figure_7_figure_supplement_3.pdf]

Figure 7 - Figure Supplement 3

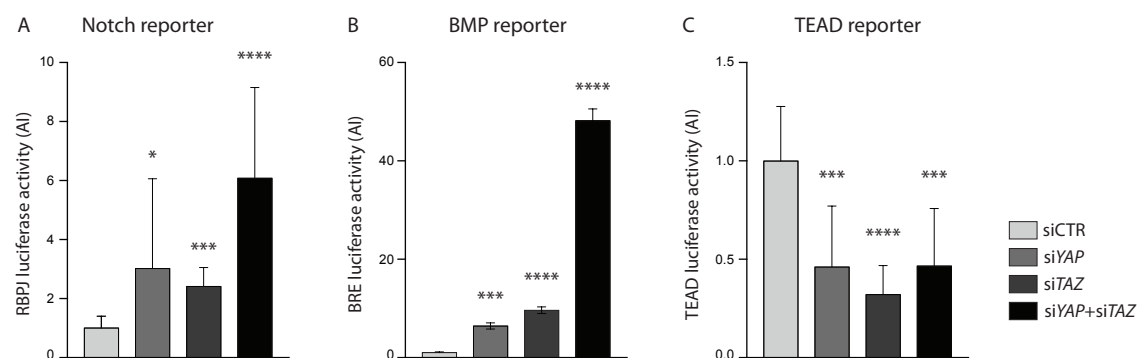

**Figure 7 - Figure supplement 3. YAP and TAZ knockdown increases Notch and BMP reporter activities *in vitro*.**  
**A-C,** Luciferase reporter assays in YAP, TAZ and YAP/TAZ knockdown HUVECs and controls for Notch reporter (A), BMP reporter (B) and TEAD reporter (C). Data are mean  $\pm$  SD. *p* values were calculated using unpaired *t*-test. *n*  $\geq$  3 experiments for Notch reporter, 3 experiments for BMP reporter,  $\geq$  6 experiments for TEAD reporter. \*, *p* < 0.05; \*\*, *p* < 0.01; \*\*\*, *p* < 0.001; \*\*\*\*, *p* < 0.0001.
