# Supplementary material for: YAP and TAZ regulate adherens junction dynamics and endothelial cell distribution during vascular development
Source: eLife journal article supplement (doi:10.7554/elife.31037), 2018-02-05
Supplement: supp [file elife_poa_e31037_Figure_7_figure_supplement_4.pdf › elife_poa_e31037_Figure_7_figure_supplement_4.pdf]

Figure 7 - Figure Supplement 4

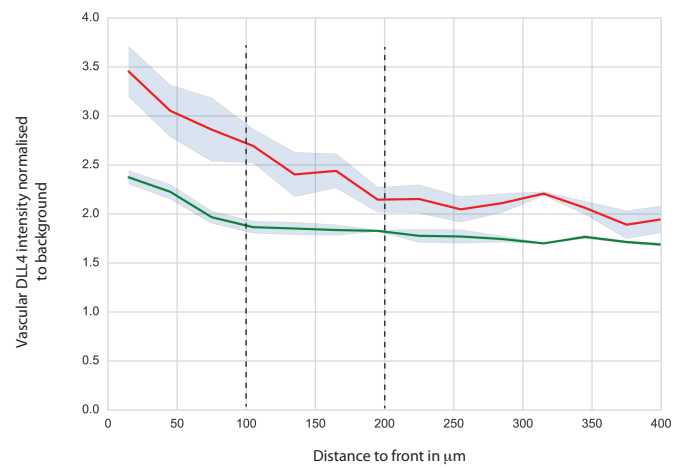

**Figure 7 - Figure supplement 4. DLL4 intensity in *YapTaz* iEC-KO.**

Graph shows mean DLL4 staining intensity in the vascular retina of control (green) and *YapTaz* iEC-KO (red) P6 pups normalised to the background intensity. Data are mean  $\pm$  SEM.  $n = 3$  control and 3 *YapTaz* iEC-KO.
