# Supplementary material for: YAP and TAZ regulate adherens junction dynamics and endothelial cell distribution during vascular development
Source: eLife journal article supplement (doi:10.7554/elife.31037), 2018-02-05
Supplement: supp [file elife_poa_e31037_Figure_8_figure_supplement_1.pdf › elife_poa_e31037_Figure_8_figure_supplement_1.pdf]

Figure 8 - Figure Supplement 1

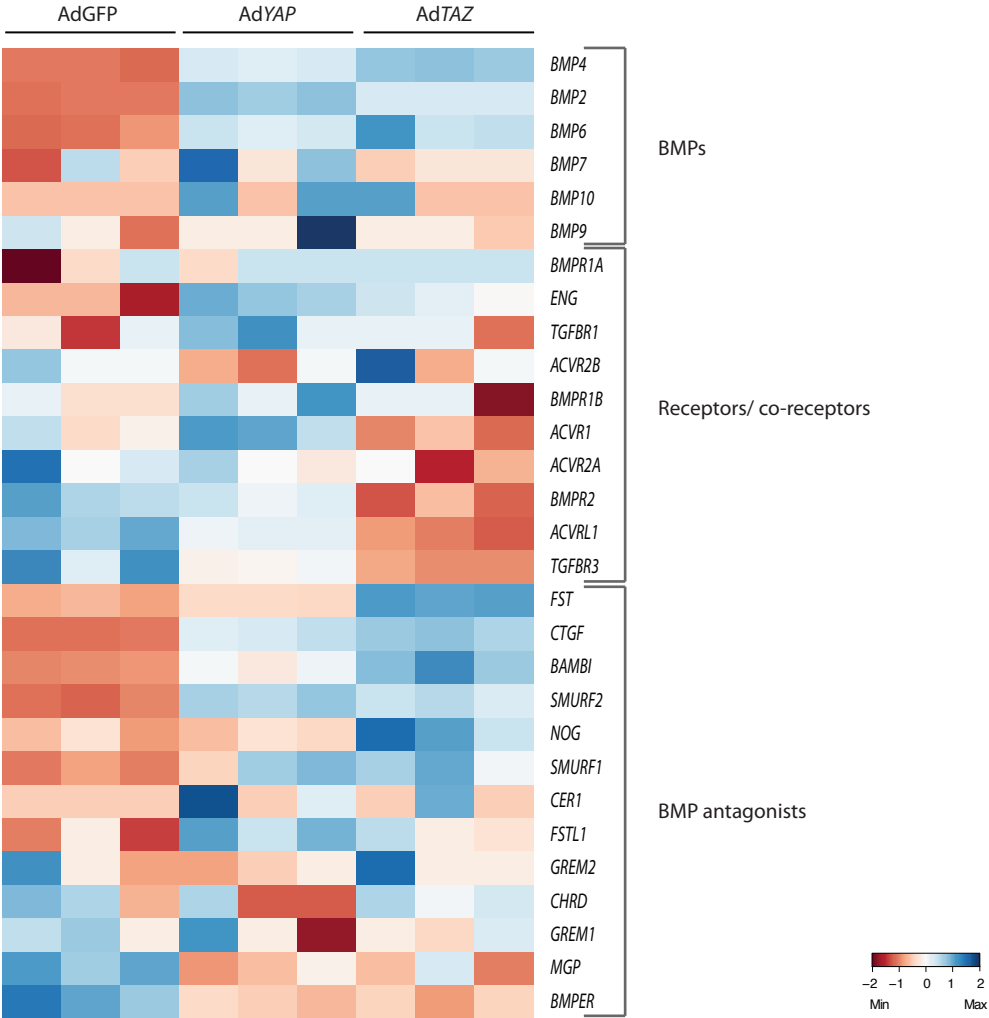

**Figure 8 - Figure supplement 1. Nuclear YAP and TAZ increase the expression of BMP inhibitors**  
Heatmap of BMPs, BMP receptors and co-receptors and BMP inhibitors genes in control (AdGFP), AdYAP and AdTAZ gain of function mutant cells.
